# Supplementary material for: A planet within the debris disk around the pre-main-sequence star AU Microscopii
Source: Springer Nature journal article supplement (doi:10.1038/s41586-020-2400-z), 2020-06-24
Supplement: MOESM9 [file 41586_2020_2400_MOESM9_ESM.xlsx]

## Sheet: CCFbis
JD	Stellar rotation period phase (D)	CCF Bis	Unc
2.45299e+06	1.78082	-619.638	2.04037
2.45316e+06	2.95942	-363.52	0.861041
2.4532e+06	3.11745	612.648	0.979796
2.45347e+06	2.72137	35.4797	0.909264
2.45347e+06	3.67253	181.37	0.838907
2.4535e+06	4.51926	-69.3752	1.15397
2.45352e+06	2.23037	290.402	0.992915
2.45355e+06	2.962	-506.004	1.11335
2.45359e+06	1.01314	-272.357	1.0729
2.45657e+06	4.60302	1146.85	1.12008
2.45657e+06	4.61371	1205.4	1.12557
2.45657e+06	0.729659	-484.748	0.992736
2.45657e+06	0.740549	-357.444	0.987991
2.45657e+06	1.79545	-430.494	0.910502
2.45657e+06	1.80645	-566.51	0.932723
2.45677e+06	4.76629	-725.876	0.986951
2.45677e+06	4.77625	65.2844	1.00093
2.45677e+06	0.900762	378.237	0.88789
2.45677e+06	0.915196	369.589	0.908546
2.45679e+06	2.41929	194.387	0.948649
2.4568e+06	3.42287	-15.3061	0.940883
2.4568e+06	0.531541	31.1977	1.02105
2.45684e+06	3.70816	-1762.88	0.984506
2.45684e+06	3.71817	-140791	0.999072
2.45698e+06	0.414763	-142.339	0.976812
2.45698e+06	0.424392	-213.879	0.993499
2.45722e+06	3.23626	-928.108	1.34977
2.45722e+06	3.24588	-907.986	1.36252
2.45733e+06	1.2744	-156.039	3.60835
2.45733e+06	1.28507	-188.411	3.75641
2.45749e+06	1.15152	-1463.48	3.416
2.45749e+06	1.16229	-1106.95	3.32413
2.45759e+06	0.71265	-577.263	3.29219
2.45759e+06	0.723321	-588.814	3.43845
2.4579e+06	3.58106	385.71	4.62432
2.4579e+06	3.59163	333.086	4.68855
2.45792e+06	2.07162	-484.605	4.65537
2.45792e+06	2.08219	173.076	4.49238
2.45804e+06	2.99556	-10300.2	3.76916
2.45804e+06	3.00635	60.4995	3.77201
2.45804e+06	0.0986649	-101.557	5.31674
2.45804e+06	0.108826	-118.091	5.45721
2.45821e+06	4.13382	-89.1551	3.33717
2.45821e+06	4.1446	-362.756	3.33186
2.45821e+06	0.290635	13.781	4.01302
2.45821e+06	0.301411	35.0496	4.17821
2.45821e+06	1.28343	-614.76	3.04385
2.45821e+06	1.29452	-615.368	3.01264

## Sheet: CCFFWHM
JD	Phase	CCF FWHM
2.45299e+06	1.78082	9.16281
2.45316e+06	2.95942	9.60485
2.4532e+06	3.11745	9.50564
2.45347e+06	2.72137	14.0315
2.45347e+06	3.67253	13.832
2.4535e+06	4.51926	14.2349
2.45352e+06	2.23037	13.489
2.45355e+06	2.962	9.16675
2.45359e+06	1.01314	14.0544
2.45657e+06	4.60302	9.76279
2.45657e+06	4.61371	9.9126
2.45657e+06	0.729659	9.18707
2.45657e+06	0.740549	9.17168
2.45657e+06	1.79545	8.83771
2.45657e+06	1.80645	9.95582
2.45677e+06	4.76629	9.39908
2.45677e+06	4.77625	9.41094
2.45677e+06	0.900762	9.99398
2.45677e+06	0.915196	9.8927
2.45679e+06	2.41929	9.57387
2.4568e+06	3.42287	8.79336
2.4568e+06	0.531541	9.25165
2.45684e+06	3.70816	8.84639
2.45684e+06	3.71817	9.28291
2.45698e+06	0.414763	9.24993
2.45698e+06	0.424392	9.24939
2.45722e+06	3.23626	9.78874
2.45722e+06	3.24588	9.79692
2.45733e+06	1.2744	8.8753
2.45733e+06	1.28507	9.32171
2.45749e+06	1.15152	9.34781
2.45749e+06	1.16229	9.40726
2.45759e+06	0.71265	10.1529
2.45759e+06	0.723321	10.1618
2.4579e+06	3.58106	9.475
2.4579e+06	3.59163	9.50546
2.45792e+06	2.07162	9.21897
2.45792e+06	2.08219	9.23864
2.45804e+06	2.99556	9.34523
2.45804e+06	3.00635	9.90123
2.45804e+06	0.0986649	9.30457
2.45804e+06	0.108826	9.3197
2.45821e+06	4.13382	9.3057
2.45821e+06	4.1446	9.31936
2.45821e+06	0.290635	9.40294
2.45821e+06	0.301411	8.92348
2.45821e+06	1.28343	9.88841
2.45821e+06	1.29452	9.94378

## Sheet: CaIIHK
JD	Phase	CaII H&K	Unc
2.45299e+06	1.78082	7.84768	0.0366501
2.45316e+06	2.95942	7.22634	0.0138702
2.4532e+06	3.11745	7.61889	0.0164204
2.45347e+06	2.72137	8.21141	0.0155978
2.45347e+06	3.67253	7.21596	0.0141225
2.4535e+06	4.51926	7.41903	0.0185362
2.45352e+06	2.23037	10.0268	0.0185461
2.45355e+06	2.962	7.95089	0.0172919
2.45359e+06	1.01314	8.00861	0.0172984
2.45657e+06	4.60302	8.73656	0.0219655
2.45657e+06	4.61371	8.63489	0.0221394
2.45657e+06	0.729659	8.90521	0.019789
2.45657e+06	0.740549	9.1064	0.0196855
2.45657e+06	1.79545	9.1093	0.0188863
2.45657e+06	1.80645	9.40399	0.019638
2.45677e+06	4.76629	9.54359	0.0211038
2.45677e+06	4.77625	9.30109	0.0209312
2.45677e+06	0.900762	8.17559	0.016471
2.45677e+06	0.915196	8.05469	0.0168248
2.45679e+06	2.41929	8.74989	0.0184282
2.4568e+06	3.42287	7.66868	0.0176471
2.4568e+06	0.531541	9.82258	0.0225284
2.45684e+06	3.70816	8.27481	0.0198714
2.45684e+06	3.71817	8.45069	0.0205559
2.45698e+06	0.414763	7.63286	0.0190211
2.45698e+06	0.424392	7.55451	0.0191566
2.45722e+06	3.23626	7.84554	0.0236641
2.45722e+06	3.24588	7.79741	0.0238193
2.45733e+06	1.2744	7.81585	0.0159501
2.45733e+06	1.28507	7.71754	0.016813
2.45749e+06	1.15152	8.89085	0.0134133
2.45749e+06	1.16229	8.2308	0.0116834
2.45759e+06	0.71265	8.56563	0.012161
2.45759e+06	0.723321	8.5877	0.0126466
2.4579e+06	3.58106	7.77632	0.0193155
2.4579e+06	3.59163	7.83747	0.0195022
2.45792e+06	2.07162	8.79447	0.0223919
2.45792e+06	2.08219	8.84102	0.0214177
2.45804e+06	2.99556	8.95415	0.0156082
2.45804e+06	3.00635	8.74743	0.017714
2.45804e+06	0.0986649	7.76674	0.0225255
2.45804e+06	0.108826	7.38498	0.0228651
2.45821e+06	4.13382	7.32337	0.012622
2.45821e+06	4.1446	7.3681	0.0124589
2.45821e+06	0.290635	7.31485	0.0149308
2.45821e+06	0.301411	7.3367	0.0153916
2.45821e+06	1.28343	8.41723	0.0115942
2.45821e+06	1.29452	8.31489	0.0110685

## Sheet: Halpha
JD	Phase	Halpha
2.45299e+06	1.78082	-1.87923
2.45316e+06	2.95942	-1.87566
2.4532e+06	3.11745	-2.07515
2.45347e+06	2.72137	-2.27617
2.45347e+06	3.67253	-1.76469
2.4535e+06	4.51926	-1.91745
2.45352e+06	2.23037	-2.93705
2.45355e+06	2.962	-2.25022
2.45359e+06	1.01314	-2.20959
2.45657e+06	4.60302	-2.75023
2.45657e+06	4.61371	-2.71184
2.45657e+06	0.729659	-2.78191
2.45657e+06	0.740549	-2.82466
2.45657e+06	1.79545	-2.79119
2.45657e+06	1.80645	-2.88268
2.45677e+06	4.76629	-2.95377
2.45677e+06	4.77625	-2.89127
2.45677e+06	0.900762	-2.54875
2.45677e+06	0.915196	-2.52776
2.45679e+06	2.41929	-2.71656
2.4568e+06	3.42287	-2.2535
2.4568e+06	0.531541	-3.29893
2.45684e+06	3.70816	-2.46753
2.45684e+06	3.71817	-2.50744
2.45698e+06	0.414763	-2.48015
2.45698e+06	0.424392	-2.4473
2.45722e+06	3.23626	-2.34866
2.45722e+06	3.24588	-2.3346
2.45733e+06	1.2744	-2.48998
2.45733e+06	1.28507	-2.43146
2.45749e+06	1.15152	-3.08149
2.45749e+06	1.16229	-3.06377
2.45759e+06	0.71265	-2.74169
2.45759e+06	0.723321	-2.75135
2.4579e+06	3.58106	-2.49412
2.4579e+06	3.59163	-2.49102
2.45792e+06	2.07162	-2.94049
2.45792e+06	2.08219	-2.95512
2.45804e+06	2.99556	-3.05097
2.45804e+06	3.00635	-3.01326
2.45804e+06	0.0986649	-2.25457
2.45804e+06	0.108826	-2.22844
2.45821e+06	4.13382	-2.13891
2.45821e+06	4.1446	-2.15776
2.45821e+06	0.290635	-2.14323
2.45821e+06	0.301411	-2.13798
2.45821e+06	1.28343	-2.73723
2.45821e+06	1.29452	-2.70269

## Sheet: NaD1
JD	Phase	NaD1
2.45299e+06	1.78082	0.938195
2.45316e+06	2.95942	0.937565
2.4532e+06	3.11745	0.919165
2.45347e+06	2.72137	0.882582
2.45347e+06	3.67253	0.950521
2.4535e+06	4.51926	0.923659
2.45352e+06	2.23037	0.736213
2.45355e+06	2.962	0.909995
2.45359e+06	1.01314	0.908614
2.45657e+06	4.60302	0.860546
2.45657e+06	4.61371	0.862552
2.45657e+06	0.729659	0.831174
2.45657e+06	0.740549	0.807495
2.45657e+06	1.79545	0.804855
2.45657e+06	1.80645	0.786893
2.45677e+06	4.76629	0.80695
2.45677e+06	4.77625	0.823981
2.45677e+06	0.900762	0.885654
2.45677e+06	0.915196	0.888734
2.45679e+06	2.41929	0.84586
2.4568e+06	3.42287	0.918539
2.4568e+06	0.531541	0.796559
2.45684e+06	3.70816	0.87734
2.45684e+06	3.71817	0.866749
2.45698e+06	0.414763	0.919631
2.45698e+06	0.424392	0.921671
2.45722e+06	3.23626	0.901748
2.45722e+06	3.24588	0.899416
2.45733e+06	1.2744	0.897788
2.45733e+06	1.28507	0.903484
2.45749e+06	1.15152	0.838523
2.45749e+06	1.16229	0.831049
2.45759e+06	0.71265	0.859364
2.45759e+06	0.723321	0.856524
2.4579e+06	3.58106	0.886189
2.4579e+06	3.59163	0.887669
2.45792e+06	2.07162	0.838143
2.45792e+06	2.08219	0.838258
2.45804e+06	2.99556	0.828397
2.45804e+06	3.00635	0.83646
2.45804e+06	0.0986649	0.912326
2.45804e+06	0.108826	0.92571
2.45821e+06	4.13382	0.92004
2.45821e+06	4.1446	0.919151
2.45821e+06	0.290635	0.928579
2.45821e+06	0.301411	0.93065
2.45821e+06	1.28343	0.863868
2.45821e+06	1.29452	0.86961

## Sheet: RV
JD	Phase	RV	Unc
2.45299e+06	1.78082	81.6102	5.63591
2.45316e+06	2.95942	27.225	2.43384
2.4532e+06	3.11745	-23.7135	3.05293
2.45347e+06	2.72137	-129.949	3.65028
2.45347e+06	3.67253	-163.314	4.87532
2.4535e+06	4.51926	-34.6513	3.28284
2.45352e+06	2.23037	-337.219	11.5998
2.45355e+06	2.962	-28.0698	2.98779
2.45359e+06	1.01314	143.589	4.33833
2.45657e+06	4.60302	-235.873	4.4347
2.45657e+06	4.61371	-230.07	4.54049
2.45657e+06	0.729659	-16.7449	3.24828
2.45657e+06	0.740549	-31.4737	3.41643
2.45657e+06	1.79545	200.481	3.92496
2.45657e+06	1.80645	203.823	4.13856
2.45677e+06	4.76629	-44.2229	4.02559
2.45677e+06	4.77625	-53.5343	4.15187
2.45677e+06	0.900762	-1.35403	2.50133
2.45677e+06	0.915196	0	2.90362
2.45679e+06	2.41929	-111.632	3.23169
2.4568e+06	3.42287	73.2231	3.75212
2.4568e+06	0.531541	27.5722	3.76363
2.45684e+06	3.70816	166.158	4.22869
2.45684e+06	3.71817	169.519	4.2632
2.45698e+06	0.414763	-56.506	3.71189
2.45698e+06	0.424392	-57.6349	3.6621
2.45722e+06	3.23626	224.033	5.16264
2.45722e+06	3.24588	223.309	5.35357
2.45733e+06	1.2744	102.863	2.35496
2.45733e+06	1.28507	103.414	2.75653
2.45749e+06	1.15152	104.426	5.04077
2.45749e+06	1.16229	101.605	4.6424
2.45759e+06	0.71265	81.8197	2.4896
2.45759e+06	0.723321	78.6579	2.71068
2.4579e+06	3.58106	-276.271	6.66182
2.4579e+06	3.59163	-280.803	6.16001
2.45792e+06	2.07162	169.247	3.99149
2.45792e+06	2.08219	165.482	4.08126
2.45804e+06	2.99556	-9.13959	2.8497
2.45804e+06	3.00635	-15.6865	2.7631
2.45804e+06	0.0986649	-36.2354	3.94609
2.45804e+06	0.108826	-30.1605	3.88126
2.45821e+06	4.13382	-34.3968	2.75467
2.45821e+06	4.1446	-36.0984	2.21794
2.45821e+06	0.290635	38.7756	2.92614
2.45821e+06	0.301411	43.9619	2.67382
2.45821e+06	1.28343	90.2446	2.6392
2.45821e+06	1.29452	87.4288	3.03134
