# Supplementary material for: A planet within the debris disk around the pre-main-sequence star AU Microscopii
Source: Springer Nature journal article supplement (doi:10.1038/s41586-020-2400-z), 2020-06-24
Supplement: MOESM10 [file 41586_2020_2400_MOESM10_ESM.xlsx]

## Sheet: RVs_unphased
Spectrograph	Time	RVs	Unc	Residuals
HARPS	2986.51	58.9793	3.93569	0.0417145
HARPS	3157.9	9.84994	2.3623	0.0180997
HARPS	3201.82	-32.7501	2.89416	-0.0355827
HARPS	3468.89	-117.72	3.75645	0.0717342
HARPS	3469.84	-147.322	3.77325	-0.153841
HARPS	3499.87	-39.0947	3.74814	0.0251807
HARPS	3521.89	-275.762	8.09161	-1.34912
HARPS	3551.8	-57.0071	3.06013	0.0609253
HARPS	3593.62	96.2164	4.87986	0.183247
HARPS	6568.51	-225.723	4.29588	0.562612
HARPS	6568.52	-226.625	4.75192	-1.03032
HARPS	6569.49	-21.6033	2.31165	1.93175
HARPS	6569.51	-26.6699	3.28713	-3.90304
HARPS	6570.56	166.472	5.07106	1.19687
HARPS	6570.57	165.011	4.98215	-0.871011
HARPS	6772.91	-42.9736	2.93663	2.32639
HARPS	6772.92	-48.8082	2.80398	-2.18388
HARPS	6773.91	-29.9487	1.83853	-0.542427
HARPS	6773.93	-28.4435	2.04821	0.637977
HARPS	6794.88	-111.997	3.47135	-0.0774184
HARPS	6795.89	47.1068	3.47876	-0.00942768
HARPS	6797.86	-3.53185	3.23573	0.152271
HARPS	6844.8	120.172	5.1267	-4.92106
HARPS	6844.81	130.538	4.4278	3.82279
HARPS	6982.53	-47.2157	3.35107	0.153878
HARPS	6982.54	-47.6513	3.0325	-0.160689
HARPS	7223.64	177.558	5.75752	3.36424
HARPS	7223.65	171.334	4.96062	-2.25937
HARPS	7333.53	91.1597	2.38298	-1.54748
HARPS	7333.54	95.9957	2.25507	1.41099
HARPS	7493.89	75.8392	4.30863	0.190627
HARPS	7493.9	75.2267	3.88333	-0.0877667
HARPS	7590.71	77.0396	2.44362	1.48223
HARPS	7590.72	72.7642	2.52814	-1.57504
HARPS	7904.81	-237.495	7.07721	1.65889
HARPS	7904.82	-242.459	7.63451	-2.75088
HARPS	7917.89	142.098	4.23785	0.91835
HARPS	7917.9	139.907	3.82474	-0.616805
HARPS	8035.52	-9.42282	3.06255	0.249535
HARPS	8035.53	-11.1364	3.13905	-0.246256
HARPS	8037.49	-33.8733	2.93853	1.6774
HARPS	8037.5	-39.0961	3.6759	-2.64144
HARPS	8206.87	-41.9203	2.738	-0.403535
HARPS	8206.88	-40.7896	2.3261	0.281328
HARPS	8207.89	14.9891	2.7237	0.141861
HARPS	8207.9	15.8109	2.34002	-0.112458
HARPS	8208.88	82.1902	1.97949	0.786677
HARPS	8208.89	79.5046	2.00918	-0.793447
iSHELL	7684.76	65.2398	3.83016	0.25129
iSHELL	7698.75	4.7016	20.2035	-2.47188
iSHELL	7699.71	33.7387	3.10932	-0.0826049
iSHELL	7850.13	100.992	7.67198	1.51238
iSHELL	7856.13	-27.578	14.053	-1.70434
iSHELL	7923.12	51.8025	7.29594	-0.305678
iSHELL	7931.02	2.36658	14.3457	-4.21406
iSHELL	7939.99	15.2584	2.63473	0.222257
iSHELL	7982.91	-35.7078	23.3412	-5.1562
iSHELL	7983.91	-42.0219	17.4905	-10.0438
iSHELL	7984.9	71.2784	7.69908	1.95591
iSHELL	8046.69	-11.4061	9.17625	0.702822
iSHELL	8047.68	42.6086	10.2574	0.436453
iSHELL	8048.68	10.2797	12.5049	-1.68559
iSHELL	8049.68	-43.916	16.0994	-1.79921
iSHELL	8406.81	-44.0814	9.46272	-0.654645
iSHELL	8660.08	58.0512	22.7593	-8.48864
iSHELL	8666.92	72.2959	11.7266	-3.16406
iSHELL	8668.05	-12.1302	9.39322	-1.01695
iSHELL	8675.08	162.979	9.26857	3.60532
iSHELL	8739.93	137.885	7.8931	5.92631
iSHELL	8760.71	-10.4077	10.7522	15.2361
iSHELL	8761.73	-79.7611	5.64177	-0.198974
iSHELL	8762.73	49.4771	5.59609	0.0317199
iSHELL	8763.78	17.2777	3.61518	-0.57267
iSHELL	8764.76	25.2744	3.44315	-0.551891
iSHELL	8765.71	-72.9185	1.25299	-0.19714
HIRES	3182.04	46.4518	5	0.197215
HIRES	3195.93	-180.388	5	-0.314032
HIRES	3926.02	-275.728	5	-0.468738
HIRES	3926.97	267.182	5	0.294734
HIRES	3927.91	58.2918	5	0.212853
HIRES	3933.94	156.242	5	0.280964
HIRES	3934.92	-166.638	5	-0.145752
HIRES	3960.94	248.832	5	0.20426
HIRES	3962.02	-2.0782	5	-0.355568
HIRES	4636.07	-18.1082	5	0.0768295
HIRES	4688.86	-145.468	5	-0.237145
HIRES	4808.7	-97.9282	5	-0.136094
HIRES	5015.01	-160.588	5	-0.189816
HIRES	5371.04	88.1318	5	0.131146
HIRES	5727.98	20.4618	5	0.0262727
HIRES	6638.69	317.362	5.43	0.500511

## Sheet: HIRES_GP+planet_model_unphased
times	Planet model	GP lower 1-sig	GP median	GP upper 1-sig
3182.04	13.0567	28.2022	33.1979	38.1936
3182.16	13.541	29.7835	54.2323	78.681
3182.27	13.9262	17.3504	66.1457	114.941
3182.39	14.2097	-1.81438	69.8116	141.438
3182.5	14.3892	-24.1063	67.0475	158.201
3182.62	14.4636	-46.5548	60.0464	166.648
3182.74	14.4322	-67.1026	50.8874	168.877
3182.85	14.2952	-84.6427	41.2228	167.088
3182.97	14.0538	-98.8458	32.1612	163.168
3183.08	13.7095	-109.898	24.3007	158.499
3183.2	13.2651	-118.252	17.846	153.944
3183.31	12.7236	-124.445	12.7466	149.939
3183.43	12.0891	-128.99	8.81687	146.624
3183.54	11.3662	-132.326	5.82178	143.97
3183.66	10.5603	-134.808	3.52733	141.863
3183.77	9.67708	-136.714	1.72413	140.162
3183.89	8.72314	-138.261	0.232757	138.726
3184	7.70542	-139.622	-1.10112	137.42
3184.12	6.63138	-140.947	-2.41707	136.113
3184.23	5.50886	-142.377	-3.85293	134.671
3184.35	4.34608	-144.061	-5.55928	132.942
3184.46	3.15153	-146.169	-7.7153	130.738
3184.58	1.93396	-148.909	-10.5452	127.818
3184.69	0.702261	-152.532	-14.3337	123.865
3184.81	-0.534548	-157.335	-19.4369	118.461
3184.92	-1.76742	-163.637	-26.2815	111.074
3185.04	-2.98735	-171.726	-35.3406	101.045
3185.15	-4.18541	-181.766	-47.0721	87.6217
3185.27	-5.35284	-193.639	-61.8063	70.0262
3185.39	-6.48109	-206.767	-79.5784	47.6098
3185.5	-7.56193	-219.936	-99.9219	20.0926
3185.62	-8.58743	-231.224	-121.673	-12.1226
3185.73	-9.55012	-238.116	-142.871	-47.6255
3185.85	-10.4429	-237.9	-160.837	-83.7741
3185.96	-11.2594	-228.39	-172.524	-116.658
3186.08	-11.9934	-209.144	-175.093	-141.043
3186.19	-12.6397	-185.343	-166.627	-147.911
3186.31	-13.1936	-169.955	-146.748	-123.541
3186.42	-13.6509	-150.855	-116.929	-83.0031
3186.54	-14.0084	-119.213	-80.3447	-41.4765
3186.65	-14.2634	-76.7331	-41.2739	-5.81482
3186.77	-14.4141	-28.3564	-4.22033	19.9158
3186.88	-14.4593	16.5594	26.9927	37.426
3187	-14.3988	27.548	49.8924	72.2368
3187.11	-14.233	18.0885	63.6328	109.177
3187.23	-13.963	0.486573	68.8567	137.227
3187.34	-13.5909	-21.0805	67.2524	155.585
3187.46	-13.1194	-43.3964	60.9867	165.37
3187.57	-12.5519	-64.1874	52.1901	168.568
3187.69	-11.8925	-82.1617	42.6084	167.378
3187.81	-11.1462	-96.8533	33.4518	163.757
3187.92	-10.3184	-108.365	25.406	159.177
3188.04	-9.41503	-117.109	18.739	154.587
3188.15	-8.44282	-123.611	13.439	150.489
3188.27	-7.40883	-128.389	9.33933	147.067
3188.38	-6.32064	-131.893	6.21099	144.315
3188.5	-5.1862	-134.493	3.81879	142.131
3188.61	-4.01381	-136.476	1.9491	140.374
3188.73	-2.81204	-138.069	0.417956	138.904
3188.84	-1.58969	-139.45	-0.932451	137.585
3188.96	-0.355683	-140.773	-2.24335	136.286
3189.07	0.880945	-142.178	-3.65203	134.874
3189.19	2.11115	-143.812	-5.30615	133.2
3189.3	3.32594	-145.842	-7.37941	131.083
3189.42	4.51643	-148.469	-10.088	128.293
3189.53	5.67391	-151.937	-13.7065	124.524
3189.65	6.78992	-156.537	-18.5802	119.376
3189.76	7.85629	-162.587	-25.127	112.333
3189.88	8.86523	-170.391	-33.8183	102.754
3189.99	9.80935	-180.14	-45.125	89.8904
3190.11	10.6818	-191.78	-59.4146	72.9508
3190.22	11.4761	-204.82	-76.7919	51.2365
3190.34	12.1865	-218.157	-96.8959	24.3652
3190.46	12.8078	-229.967	-118.697	-7.42573
3190.57	13.3354	-237.78	-140.368	-42.9547
3190.69	13.7656	-238.805	-159.332	-79.8595
3190.8	14.0951	-230.534	-172.557	-114.579
3190.92	14.3215	-211.626	-177.1	-142.575
3191.03	14.4432	-184.164	-170.816	-157.468
3191.15	14.4594	-169.075	-153.008	-136.941
3191.26	14.3697	-155.078	-124.81	-94.5416
3191.38	14.1751	-127.243	-89.1266	-51.0103
3191.49	13.8767	-87.6412	-50.1033	-12.5654
3191.61	13.477	-41.5786	-12.2793	17.0199
3191.72	12.9786	1.46769	20.3344	39.2011
3191.84	12.3854	20.8501	44.9834	69.1167
3191.95	11.7016	16.4797	60.5221	104.564
3192.07	10.9323	1.32378	67.3444	133.365
3192.18	10.083	-19.0104	66.9839	152.978
3192.3	9.16002	-40.857	61.555	163.967
3192.41	8.17007	-61.6627	53.2197	168.102
3192.53	7.12038	-79.9192	43.805	167.529
3192.64	6.01865	-95.0025	34.6184	164.239
3192.76	4.87292	-106.914	26.4335	159.781
3192.88	3.69157	-116.012	19.5851	155.182
3192.99	2.48325	-122.803	14.104	151.011
3193.11	1.25679	-127.802	9.84649	147.495
3193.22	0.0211587	-131.468	6.59229	144.653
3193.34	-1.2146	-134.181	4.10695	142.395
3193.45	-2.44146	-136.239	2.17388	140.586
3193.57	-3.65044	-137.875	0.605278	139.085
3193.68	-4.8327	-139.274	-0.759711	137.755
3193.8	-5.97959	-140.593	-2.06371	136.465
3193.91	-7.08273	-141.971	-3.4433	135.084
3194.03	-8.13405	-143.554	-5.04303	133.468
3194.14	-9.12586	-145.503	-7.03082	131.441
3194.26	-10.0509	-148.012	-9.61438	128.784
3194.37	-10.9024	-151.319	-13.0574	125.204
3194.49	-11.6742	-155.707	-17.6929	120.321
3194.6	-12.3605	-161.492	-23.9275	113.637
3194.72	-12.9565	-168.985	-32.2273	104.531
3194.83	-13.4576	-178.409	-43.0711	92.2673
3194.95	-13.8604	-189.764	-56.857	76.0505
3195.06	-14.1617	-202.651	-73.7527	55.1454
3195.18	-14.3594	-216.081	-93.498	29.0853
3195.29	-14.4521	-228.355	-115.197	-2.03797
3195.41	-14.4391	-237.089	-137.168	-37.2474
3195.53	-14.3205	-239.485	-156.955	-74.4244
3195.64	-14.0971	-232.879	-171.57	-110.261
3195.76	-13.7705	-215.481	-178.003	-140.525
3195.87	-13.3433	-187.413	-173.909	-160.405
3195.99	-12.8184	-169.459	-158.286	-147.113
3196.1	-12.1998	-160.021	-131.926	-103.831
3196.22	-11.492	-135.856	-97.4309	-59.0054
3196.33	-10.7	-99.322	-58.7697	-18.2174
3196.45	-9.82981	-55.7807	-20.4687	14.8433
3196.56	-8.88769	-14.1389	13.314	40.7668
3196.68	-7.88055	10.5613	39.5655	68.5697
3196.79	-6.81575	12.3465	56.8439	101.341
3196.91	-5.70108	0.531919	65.2809	130.03
3197.02	-4.54469	-18.0196	66.2314	150.482
3197.14	-3.35505	-39.0291	61.7317	162.492
3197.25	-2.14084	-59.5965	53.9535	167.504
3197.37	-0.910959	-77.9643	44.7912	167.547
3197.48	0.325609	-93.3276	35.6425	164.613
3197.6	1.55982	-105.568	27.3686	160.306
3197.71	2.78264	-114.978	20.3733	155.725
3197.83	3.98514	-122.031	14.7338	151.499
3197.94	5.15851	-127.236	10.3328	147.902
3198.06	6.29418	-131.056	6.96174	144.979
3198.18	7.38384	-133.876	4.38901	142.654
3198.29	8.41952	-136.004	2.39636	140.796
3198.41	9.39365	-137.681	0.793013	139.267
3198.52	10.2991	-139.096	-0.584446	137.927
3198.64	11.1292	-140.408	-1.87975	136.649
3198.75	11.878	-141.758	-3.22858	135.301
3198.87	12.54	-143.288	-4.7722	133.743
3198.98	13.1102	-145.154	-6.67261	131.809
3199.1	13.5846	-147.544	-9.12865	129.286
3199.21	13.9597	-150.685	-12.3925	125.9
3199.33	14.2327	-154.854	-16.7835	121.287
3199.44	14.4016	-160.362	-22.6951	114.971
3199.56	14.4652	-167.525	-30.5848	106.356
3199.67	14.4231	-176.591	-40.9342	94.7231
3199.79	14.2754	-187.613	-54.1653	79.2827
3199.9	14.0235	-200.28	-70.5017	59.2764
3200.02	13.6689	-213.725	-89.7779	34.1694
3200.13	13.2145	-226.388	-111.23	3.92843
3200.25	12.6634	-236.003	-133.328	-30.6528
3200.36	12.0197	-239.835	-153.753	-67.671
3200.48	11.2881	-235.18	-169.592	-104.005
3200.6	10.4741	-220.141	-177.802	-135.463
3200.71	9.58338	-195.026	-175.869	-156.712
3200.83	8.62265	-174.713	-162.511	-150.308
3200.94	7.59887	-166.11	-138.171	-110.232
3201.06	6.51955	-144.943	-105.132	-65.32
3201.17	5.39256	-111.375	-67.1415	-22.9081
3201.29	4.22616	-70.2984	-28.6664	12.9657
3201.4	3.02888	-29.8243	6.03179	41.8879
3201.52	1.80946	-1.84865	33.7105	69.2697
3201.63	0.576838	5.81955	52.6408	99.462
3201.75	-0.659983	-1.97228	62.6832	127.339
3201.86	-1.89196	-18.2026	64.9928	148.188
3201.98	-3.11007	-37.9924	61.5031	160.999
3202.09	-4.30542	-58.0512	54.3729	166.797
3202.21	-5.46925	-76.3434	45.5476	167.439
3202.32	-6.59307	-91.8618	36.5071	164.876
3202.44	-7.66864	-104.352	28.1975	160.747
3202.55	-8.68811	-114.023	21.0929	156.208
3202.67	-9.64402	-121.307	15.3205	151.948
3202.78	-10.5294	-126.699	10.7926	148.285
3202.9	-11.3377	-130.66	7.31536	145.291
3203.01	-12.0631	-133.58	4.66207	142.904
3203.13	-12.7002	-135.774	2.61438	141.003
3203.25	-13.2445	-137.488	0.979406	139.447
3203.36	-13.6918	-138.918	-0.408238	138.101
3203.48	-14.039	-140.222	-1.69308	136.836
3203.59	-14.2835	-141.542	-3.00969	135.522
3203.71	-14.4235	-143.017	-4.49597	134.025
3203.82	-14.458	-144.798	-6.30779	132.183
3203.94	-14.3868	-147.067	-8.63494	129.797
3204.05	-14.2103	-150.04	-11.7175	126.606
3204.17	-13.9299	-153.985	-15.8603	122.264
3204.28	-13.5475	-159.207	-21.4418	116.323
3204.4	-13.0661	-166.024	-28.9076	108.209
3204.51	-12.4891	-174.705	-38.7376	97.2295
3204.63	-11.8207	-185.349	-51.3715	82.6064
3204.74	-11.0659	-197.732	-67.0808	63.5702
3204.86	-10.2301	-211.11	-85.7876	39.5346
3204.97	-9.31944	-224.07	-106.856	10.3592
3205.09	-8.34062	-234.497	-128.912	-23.3257
3205.2	-7.30078	-239.761	-149.787	-59.8133
3205.32	-6.20753	-237.197	-166.669	-96.1414
3205.43	-5.06886	-224.949	-176.515	-128.082
3205.55	-3.89309	-203.708	-176.682	-149.656
3205.67	-2.68883	-183.963	-165.627	-147.291
3205.78	-1.46489	-173.424	-143.457	-113.489
3205.9	-0.230203	-154.32	-112.113	-69.9058
3206.01	1.00619	-123.456	-75.0911	-26.7264
3206.13	2.23524	-84.7276	-36.7482	11.2312
3206.24	3.44796	-45.37	-1.40479	42.5605
3206.36	4.6355	-15.3491	27.5005	70.3502
3206.47	5.78915	-2.7086	47.9664	98.6414
3206.59	6.90049	-6.16471	59.5786	125.322
3206.7	7.96138	-19.6119	63.2752	146.162
3206.82	8.96407	-37.8084	60.8626	159.534
3206.93	9.90123	-57.0807	54.4639	166.008
3207.05	10.766	-75.099	46.0581	167.215
3207.16	11.552	-90.6366	37.1968	165.03
3207.28	12.2536	-103.286	28.9071	161.1
3207.39	12.8656	-113.16	21.7339	156.628
3207.51	13.3836	-120.641	15.8566	152.354
3207.62	13.8036	-126.198	11.2205	148.639
3207.74	14.1228	-130.286	7.64918	145.584
3207.85	14.3386	-133.297	4.92327	143.144
3207.97	14.4497	-135.551	2.82575	141.203
3208.08	14.4551	-137.3	1.16269	139.625
3208.2	14.3547	-138.74	-0.232676	138.275
3208.32	14.1495	-140.034	-1.5053	137.024
3208.43	13.8407	-141.323	-2.78848	135.746
3208.55	13.4308	-142.742	-4.21658	134.309
3208.66	12.9227	-144.439	-5.93932	132.56
3208.78	12.3201	-146.585	-8.13726	130.311
3208.89	11.6274	-149.39	-11.038	127.314
3209.01	10.8496	-153.108	-14.9312	123.245
3209.12	9.9926	-158.037	-20.1788	117.68
3209.24	9.0625	-164.496	-27.2118	110.073
3209.35	8.06614	-172.768	-36.5041	99.7596
3209.47	7.01082	-182.996	-48.5068	85.982
3209.58	5.90425	-195.033	-63.5316	67.97
3209.7	4.75452	-208.26	-81.58	45.0998
3209.81	3.57004	-221.418	-102.138	17.1419
3209.93	2.35947	-232.558	-123.989	-15.4205
3210.04	1.13167	-239.189	-145.127	-51.0643
3210.16	-0.104385	-238.735	-162.861	-86.9863
3210.27	-1.33965	-229.401	-174.182	-118.964
3210.39	-2.5651	-211.923	-176.353	-140.783
3210.5	-3.77177	-193.827	-167.602	-141.377
3210.62	-4.95083	-181.58	-147.711	-113.843
3210.73	-6.09366	-163.759	-118.274	-72.7888
3210.85	-7.19191	-135.288	-82.4988	-29.7094
3210.97	-8.23753	-98.7981	-44.5915	9.61504
3211.08	-9.22289	-60.6037	-8.88414	42.8354
3211.2	-10.1408	-29.3379	21.0256	71.3891
3211.31	-10.9845	-12.738	42.8845	98.5069
3211.43	-11.7478	-11.9131	56.005	123.923
3211.54	-12.4252	-22.2495	61.0945	144.439
3211.66	-13.0117	-38.514	59.8106	158.135
3211.77	-13.5031	-56.7265	54.2177	165.162
3211.89	-13.8956	-74.2674	46.3099	166.887
3212	-14.1865	-89.6805	37.6984	165.077
3212.12	-14.3736	-102.392	29.4856	161.363
3212.23	-14.4556	-112.407	22.2866	156.98
3212.35	-14.4319	-120.043	16.3347	152.712
3212.46	-14.3026	-125.739	11.6109	148.961
3212.58	-14.0686	-129.938	7.95931	145.857
3212.69	-13.7318	-133.031	5.16975	143.37
3212.81	-13.2945	-135.339	3.02832	141.395
3212.92	-12.7599	-137.117	1.34112	139.799
3213.04	-12.132	-138.566	-0.0593358	138.447
3213.15	-11.4154	-139.848	-1.31801	137.212
3213.27	-10.6152	-141.104	-2.56671	135.97
3213.39	-9.73741	-142.467	-3.93621	134.595
3213.5	-8.78837	-144.079	-5.57001	132.939
3213.62	-7.77503	-146.103	-7.63939	130.824
3213.73	-6.70481	-148.739	-10.3593	128.02
3213.85	-5.58553	-152.229	-14.0038	124.222
3213.96	-4.42538	-156.863	-18.9167	119.03
3214.08	-3.23285	-162.955	-25.5127	111.93
3214.19	-2.01664	-170.799	-34.2554	102.289
3214.31	-0.78567	-180.576	-45.6015	89.373
3214.42	0.451071	-192.212	-59.8951	72.422
3214.54	1.68454	-205.205	-77.2085	50.7881
3214.65	2.9057	-218.454	-97.1431	24.1682
3214.77	4.10564	-230.187	-118.636	-7.08579
3214.88	5.27558	-238.073	-139.85	-41.6272
3215	6.40695	-239.652	-158.239	-76.8259
3215.11	7.49149	-233.168	-170.857	-108.546
3215.23	8.52126	-219.162	-174.908	-130.653
3215.34	9.48874	-203.054	-168.425	-133.796
3215.46	10.3868	-189.994	-150.885	-111.775
3215.57	11.209	-173.018	-123.528	-74.039
3215.69	11.9492	-146.655	-89.2553	-31.8554
3215.8	12.6021	-112.312	-52.0778	8.15681
3215.92	13.1628	-75.3732	-16.2931	42.7871
3216.04	13.6272	-43.4397	14.382	72.2037
3216.15	13.992	-23.7894	37.4675	98.7243
3216.27	14.2545	-19.0019	52.0094	123.021
3216.38	14.4128	-26.0635	58.4755	143.014
3216.5	14.4657	-40.1184	58.3549	156.828
3216.61	14.4129	-57.0156	53.6312	164.278
3216.73	14.2546	-73.8772	46.2942	166.466
3216.84	13.9921	-89.0179	38.0012	165.02
3216.96	13.6273	-101.689	29.9229	161.534
3217.07	13.1629	-111.775	22.7425	157.26
3217.19	12.6022	-119.522	16.7481	153.018
3217.3	11.9494	-125.329	11.959	149.247
3217.42	11.2092	-129.621	8.242	146.105
3217.53	10.3871	-132.784	5.39875	143.581
3217.65	9.48897	-135.138	3.21998	141.578
3217.76	8.52151	-136.941	1.51296	139.967
3217.88	7.49175	-138.395	0.11024	138.615
3217.99	6.40722	-139.664	-1.13275	137.398
3218.11	5.27586	-140.886	-2.34612	136.194
3218.22	4.10593	-142.193	-3.65695	134.879
3218.34	2.906	-143.72	-5.20253	133.315
3218.46	1.68484	-145.623	-7.14491	131.333
3218.57	0.451373	-148.092	-9.68638	128.719
3218.69	-0.785369	-151.356	-13.0848	125.187
3218.8	-2.01635	-155.694	-17.6654	120.363
3218.92	-3.23255	-161.414	-23.8243	113.765
3219.03	-4.4251	-168.817	-32.0117	104.794
3219.15	-5.58526	-178.114	-42.6842	92.7454
3219.26	-6.70455	-189.298	-56.2108	76.8768
3219.38	-7.77478	-201.978	-72.7253	56.5277
3219.49	-8.78813	-215.209	-91.9361	31.3365
3219.61	-9.73719	-227.398	-112.93	1.53799
3219.72	-10.615	-236.394	-134.043	-31.6918
3219.84	-11.4152	-239.861	-152.887	-65.9134
3219.95	-12.1319	-236.061	-166.609	-97.1569
3220.07	-12.7598	-225.233	-172.39	-119.548
3220.18	-13.2943	-211.246	-168.105	-124.964
3220.3	-13.7317	-198.152	-152.946	-107.74
3220.41	-14.0686	-181.872	-127.809	-73.7466
3220.53	-14.3025	-157.388	-95.2649	-33.1418
3220.64	-14.4319	-125.118	-59.0958	6.92677
3220.76	-14.4557	-89.5424	-23.5197	42.5031
3220.87	-14.3737	-57.3921	7.66953	72.7311
3220.99	-14.1866	-35.4571	31.7948	99.0466
3221.11	-13.8957	-27.1689	47.6477	122.464
3221.22	-13.5032	-30.9534	55.4514	141.856
3221.34	-13.0119	-42.6006	56.5106	155.622
3221.45	-12.4254	-57.9581	52.707	163.372
3221.57	-11.748	-73.9477	46.0062	165.96
3221.68	-10.9847	-88.6679	38.0972	164.862
3221.8	-10.141	-101.192	30.2106	161.613
3221.91	-9.22314	-111.277	23.0939	157.465
3222.03	-8.2378	-119.087	17.0906	153.268
3222.14	-7.19219	-124.974	12.2598	149.494
3222.26	-6.09395	-129.34	8.49373	146.327
3222.37	-4.95113	-132.559	5.60765	143.775
3222.49	-3.77208	-134.952	3.39872	141.749
3222.6	-2.56542	-136.774	1.67658	140.127
3222.72	-1.33997	-138.23	0.27457	138.779
3222.83	-0.104705	-139.483	-0.951015	137.581
3222.95	1.13135	-140.671	-2.12834	136.414
3223.06	2.35915	-141.922	-3.38075	135.16
3223.18	3.56973	-143.365	-4.83938	133.686
3223.29	4.75421	-145.149	-6.65712	131.835
3223.41	5.90395	-147.453	-9.02366	129.405
3223.52	7.01054	-150.494	-12.1806	126.133
3223.64	8.06587	-154.538	-16.434	121.67
3223.76	9.06224	-159.885	-22.1598	115.565
3223.87	9.99236	-166.838	-29.7918	107.254
3223.99	10.8494	-175.633	-39.7817	96.0692
3224.1	11.6272	-186.321	-52.5159	81.2894
3224.22	12.3199	-198.615	-68.1808	62.2532
3224.33	12.9225	-211.717	-86.5819	38.5534
3224.45	13.4307	-224.22	-106.949	10.3214
3224.56	13.8406	-234.155	-127.793	-21.4314
3224.68	14.1494	-239.321	-146.896	-54.472
3224.79	14.3547	-237.986	-161.522	-85.0572
3224.91	14.455	-230.061	-168.863	-107.666
3225.02	14.4497	-218.242	-166.672	-115.103
3225.14	14.3387	-205.686	-153.888	-102.089
3225.25	14.1228	-190.128	-131.069	-72.0095
3225.37	13.8037	-167.355	-100.447	-33.5393
3225.48	13.3837	-137.097	-65.5444	6.00783
3225.6	12.8658	-102.991	-30.4563	42.0784
3225.71	12.2538	-70.9935	0.989229	72.972
3225.83	11.5522	-47.4126	25.9508	99.3143
3225.94	10.7662	-36.1399	42.9827	122.105
3226.06	9.90143	-36.7799	52.0632	140.906
3226.18	8.96429	-45.9104	54.3	154.51
3226.29	7.96162	-59.546	51.4535	162.453
3226.41	6.90074	-74.4875	45.4457	165.379
3226.52	5.78941	-88.644	37.9818	164.608
3226.64	4.63576	-100.915	30.3423	161.599
3226.75	3.44824	-110.924	23.3347	157.593
3226.87	2.23552	-118.746	17.3569	153.46
3226.98	1.00647	-124.68	12.5093	149.699
3227.1	-0.22992	-129.097	8.71129	146.52
3227.21	-1.4646	-132.36	5.79401	143.948
3227.33	-2.68856	-134.782	3.56265	141.907
3227.44	-3.89282	-136.618	1.8304	140.279
3227.56	-5.0686	-138.072	0.43225	138.937
3227.67	-6.20728	-139.308	-0.774196	137.759
3227.79	-7.30054	-140.461	-1.91492	136.631
3227.9	-8.3404	-141.655	-3.10945	135.436
3228.02	-9.31923	-143.016	-4.48285	134.051
3228.13	-10.2299	-144.684	-6.17902	132.326
3228.25	-11.0657	-146.826	-8.37522	130.076
3228.36	-11.8206	-149.649	-11.2968	127.056
3228.48	-12.489	-153.403	-15.2304	122.942
3228.59	-13.066	-158.379	-20.5306	117.317
3228.71	-13.5475	-164.878	-27.6125	109.653
3228.83	-13.9298	-173.154	-36.9184	99.3176
3228.94	-14.2103	-183.311	-48.8452	85.6202
3229.06	-14.3868	-195.151	-63.6226	67.9059
3229.17	-14.4581	-208.021	-81.1433	45.7347
3229.29	-14.4236	-220.692	-100.773	19.147
3229.4	-14.2836	-231.382	-121.192	-11.0029
3229.52	-14.0391	-238.029	-140.364	-42.6985
3229.63	-13.6919	-238.911	-155.688	-72.4651
3229.75	-13.2446	-233.63	-164.404	-95.1787
3229.86	-12.7004	-223.971	-164.176	-104.381
3229.98	-12.0633	-212.356	-153.721	-95.0858
3230.09	-11.3379	-197.629	-133.279	-68.9298
3230.21	-10.5296	-176.455	-104.739	-33.0227
3230.32	-9.64428	-148.154	-71.335	5.4842
3230.44	-8.68839	-115.615	-37.002	41.6111
3230.55	-7.66893	-84.0815	-5.55933	72.9628
3230.67	-6.59337	-59.3915	20.023	99.4375
3230.78	-5.46957	-45.6516	38.0828	121.817
3230.9	-4.30574	-43.3789	48.3588	140.096
3231.01	-3.1104	-49.9716	51.7522	153.476
3231.13	-1.89229	-61.7531	49.885	161.523
3231.25	-0.660322	-75.4941	44.617	164.728
3231.36	0.5765	-88.9527	37.6535	164.26
3231.48	1.80913	-100.865	30.3138	161.493
3231.59	3.02854	-110.723	23.4601	157.644
3231.71	4.22584	-118.506	17.5426	153.591
3231.82	5.39224	-124.451	12.7038	149.859
3231.94	6.51924	-128.897	8.89181	146.681
3232.05	7.59858	-132.189	5.95562	144.1
3232.17	8.62237	-134.63	3.71002	142.05
3232.28	9.58312	-136.474	1.973	140.42
3232.4	10.4738	-137.923	0.581977	139.087
3232.51	11.2879	-139.139	-0.603597	137.932
3232.63	12.0195	-140.256	-1.70727	136.842
3232.74	12.6632	-141.395	-2.84471	135.706
3232.86	13.2143	-142.676	-4.135	134.406
3232.97	13.6688	-144.231	-5.7133	132.804
3233.09	14.0233	-146.216	-7.74467	130.727
3233.2	14.2754	-148.826	-10.4385	127.949
3233.32	14.423	-152.297	-14.0619	124.173
3233.43	14.4652	-156.906	-18.9473	119.012
3233.55	14.4016	-162.952	-25.489	111.974
3233.66	14.2327	-170.7	-34.1163	102.468
3233.78	13.9597	-180.295	-45.2303	89.8347
3233.9	13.5847	-191.625	-59.0949	73.4349
3234.01	13.1103	-204.166	-75.6799	52.8061
3234.13	12.5401	-216.862	-94.4756	27.9105
3234.24	11.8782	-228.117	-114.331	-0.545547
3234.36	11.1294	-236.015	-133.391	-30.7662
3234.47	10.2993	-238.851	-149.21	-59.5697
3234.59	9.39384	-235.96	-159.103	-82.2457
3234.7	8.41973	-228.415	-160.682	-92.9499
3234.82	7.38406	-218.012	-152.478	-86.9447
3234.93	6.29441	-204.255	-134.435	-64.6147
3235.05	5.15876	-184.612	-108.096	-31.5794
3235.16	3.98539	-158.221	-76.3935	5.43381
3235.28	2.7829	-127.329	-43.0653	41.1983
3235.39	1.56008	-96.5222	-11.8805	72.7613
3235.51	0.325873	-71.179	14.0993	99.3777
3235.62	-0.910696	-55.464	33.0206	121.505
3235.74	-2.14058	-50.5739	44.3916	139.357
3235.85	-3.35479	-54.6873	48.9021	152.491
3235.97	-4.54444	-64.5365	48.0214	160.579
3236.08	-5.70084	-76.9534	43.5289	164.011
3236.2	-6.81552	-89.5935	37.1141	163.822
3236.31	-7.88033	-101.049	30.1235	161.296
3236.43	-8.88749	-110.681	23.4669	157.615
3236.55	-9.82963	-118.37	17.6444	153.659
3236.66	-10.6999	-124.291	12.8402	149.972
3236.78	-11.4918	-128.743	9.03285	146.809
3236.89	-12.1997	-132.047	6.09054	144.228
3237.01	-12.8184	-134.498	3.83929	142.177
3237.12	-13.3432	-136.344	2.10307	140.55
3237.24	-13.7705	-137.784	0.722561	139.229
3237.35	-14.097	-138.978	-0.440404	138.097
3237.47	-14.3205	-140.059	-1.50668	137.045
3237.58	-14.4391	-141.143	-2.58804	135.967
3237.7	-14.4522	-142.345	-3.7977	134.75
3237.81	-14.3595	-143.791	-5.2623	133.266
3237.93	-14.1618	-145.625	-7.13514	131.355
3238.04	-13.8605	-148.029	-9.60998	128.809
3238.16	-13.4578	-151.225	-12.9343	125.356
3238.27	-12.9567	-155.476	-17.4184	120.639
3238.39	-12.3607	-161.073	-23.4343	114.204
3238.5	-11.6744	-168.289	-31.3946	105.5
3238.62	-10.9027	-177.302	-41.6992	93.9039
3238.73	-10.0512	-188.072	-54.638	78.7964
3238.85	-9.12614	-200.197	-70.2468	59.7033
3238.97	-8.13435	-212.782	-88.1306	36.5209
3239.08	-7.08305	-224.415	-107.299	9.81799
3239.2	-5.97992	-233.329	-126.079	-18.8279
3239.31	-4.83304	-237.851	-142.195	-46.5387
3239.43	-3.65078	-237.101	-153.06	-69.0192
3239.54	-2.44181	-231.586	-156.273	-80.96
3239.66	-1.21496	-222.572	-150.211	-77.8512
3239.77	0.0208013	-209.917	-134.547	-59.1776
3239.89	1.25643	-191.773	-110.493	-29.2127
3240	2.48289	-167.247	-80.662	5.92291
3240.12	3.69122	-138.064	-48.5658	40.9325
3240.23	4.87257	-108.206	-17.8846	72.4371
3240.35	6.01831	-82.6002	8.26651	99.1332
3240.46	7.12006	-65.3649	27.8709	121.107
3240.58	8.16976	-58.1876	40.2197	138.627
3240.69	9.15973	-59.9459	45.7902	151.526
3240.81	10.0827	-67.8384	45.8875	159.613
3240.92	10.932	-78.8406	42.1946	163.23
3241.04	11.7014	-90.5585	36.369	163.296
3241.15	12.3852	-101.465	29.7721	161.009
3241.27	12.9784	-110.799	23.3536	157.506
3241.38	13.4768	-118.344	17.6599	153.664
3241.5	13.8766	-124.204	12.9164	150.037
3241.62	14.1749	-128.636	9.13242	146.901
3241.73	14.3697	-131.937	6.19715	144.331
3241.85	14.4593	-134.388	3.94912	142.286
3241.96	14.4432	-136.228	2.21946	140.667
3242.08	14.3215	-137.655	0.852951	139.361
3242.19	14.0951	-138.825	-0.285677	138.254
3242.31	13.7656	-139.869	-1.31432	137.241
3242.42	13.3355	-140.9	-2.34077	136.218
3242.54	12.8079	-142.027	-3.47254	135.082
3242.65	12.1866	-143.366	-4.82807	133.71
3242.77	11.4762	-145.055	-6.54927	131.957
3242.88	10.6819	-147.262	-8.81476	129.632
3243	9.80952	-150.192	-11.8529	126.486
3243.11	8.86541	-154.096	-15.9515	122.193
3243.23	7.85649	-159.253	-21.4593	116.335
3243.34	6.79013	-165.939	-28.7699	108.399
3243.46	5.67413	-174.357	-38.2767	97.8039
3243.57	4.51666	-184.53	-50.2878	83.9543
3243.69	3.32618	-196.161	-64.8945	66.3725
3243.8	2.11139	-208.511	-81.8053	44.9006
3243.92	0.88119	-220.342	-100.18	19.9819
3244.04	-0.355438	-230.04	-118.529	-7.01691
3244.15	-1.58944	-235.982	-134.752	-33.5219
3244.27	-2.8118	-237.124	-146.385	-55.645
3244.38	-4.01358	-233.526	-151.042	-68.5586
3244.5	-5.18598	-225.998	-146.987	-67.9766
3244.61	-6.32043	-214.562	-133.65	-52.739
3244.73	-7.40863	-197.903	-111.924	-25.9455
3244.84	-8.44263	-175.201	-84.0994	7.00225
3244.96	-9.41486	-147.772	-53.4367	40.8983
3245.07	-10.3182	-119.047	-23.4908	72.0652
3245.19	-11.1461	-93.5123	2.60758	98.7275
3245.3	-11.8924	-75.1709	22.7088	120.589
3245.42	-12.5518	-66.0496	35.904	137.858
3245.53	-13.1193	-65.6274	42.4612	150.55
3245.65	-13.5908	-71.589	43.513	158.615
3245.76	-13.963	-81.1205	40.6314	162.383
3245.88	-14.233	-91.8327	35.4268	162.686
3245.99	-14.3989	-102.109	29.2628	160.635
3246.11	-14.4594	-111.078	23.1205	157.319
3246.22	-14.4142	-118.427	17.5882	153.603
3246.34	-14.2635	-124.191	12.9307	150.053
3246.45	-14.0086	-128.579	9.18909	146.957
3246.57	-13.6511	-131.86	6.27417	144.409
3246.69	-13.1938	-134.299	4.03842	142.376
3246.8	-12.6399	-136.128	2.32121	140.771
3246.92	-11.9936	-137.538	0.972237	139.482
3247.03	-11.2596	-138.683	-0.140335	138.402
3247.15	-10.4432	-139.689	-1.13117	137.427
3247.26	-9.55041	-140.667	-2.10404	136.459
3247.38	-8.58775	-141.721	-3.16088	135.399
3247.49	-7.56226	-142.96	-4.41228	134.135
3247.61	-6.48143	-144.51	-5.98923	132.532
3247.72	-5.35319	-146.527	-8.05578	130.416
3247.84	-4.18577	-149.204	-10.8216	127.561
3247.95	-2.98772	-152.773	-14.5524	123.668
3248.07	-1.7678	-157.503	-19.5731	118.356
3248.18	-0.534923	-163.665	-26.2559	111.154
3248.3	0.701885	-171.484	-34.9837	101.516
3248.41	1.93358	-181.03	-46.0754	88.8795
3248.53	3.15116	-192.105	-59.668	72.7694
3248.64	4.34571	-204.108	-75.5615	52.9847
3248.76	5.50851	-215.968	-93.0559	29.8564
3248.87	6.63104	-226.228	-110.838	4.55145
3248.99	7.70509	-233.329	-126.991	-20.6526
3249.1	8.72282	-236.116	-139.188	-42.2612
3249.22	9.67678	-234.296	-145.093	-55.8907
3249.34	10.56	-228.292	-142.888	-57.4837
3249.45	11.366	-218.16	-131.793	-45.4263
3249.57	12.0889	-202.985	-112.402	-21.8196
3249.68	12.7234	-182.07	-86.6826	8.70461
3249.8	13.2649	-156.42	-57.6254	41.1694
3249.91	13.7094	-128.977	-28.6279	71.7216
3250.03	14.0536	-103.801	-2.79996	98.2007
3250.14	14.2951	-84.7258	17.6078	119.941
3250.26	14.4321	-74.002	31.507	137.016
3250.37	14.4635	-71.6096	38.9631	149.536
3250.49	14.3892	-75.7102	40.9312	157.573
3250.6	14.2097	-83.7498	38.8605	161.471
3250.72	13.9262	-93.3947	34.2994	161.994
3250.83	13.541	-102.971	28.6014	160.174
3250.95	13.0567	-111.514	22.7698	157.054
3251.06	12.477	-118.62	17.4294	153.479
3251.18	11.8061	-124.253	12.8827	150.018
3251.29	11.0488	-128.573	9.20197	146.976
3251.41	10.2107	-131.818	6.32072	144.459
3251.52	9.298	-134.234	4.10636	142.447
3251.64	8.31731	-136.045	2.40754	140.86
3251.76	7.27582	-137.433	1.07967	139.592
3251.87	6.18113	-138.55	-0.00515432	138.54
3251.99	5.04127	-139.519	-0.958073	137.603
3252.1	3.86455	-140.446	-1.87881	136.689
3252.22	2.65959	-141.429	-2.86387	135.702
3252.33	1.43521	-142.572	-4.0163	134.539
3252.45	0.20035	-143.991	-5.45674	133.077
3252.56	-1.03595	-145.829	-7.3353	131.158
3252.68	-2.26466	-148.264	-9.84372	128.576
3252.79	-3.47678	-151.513	-13.2259	125.061
3252.91	-4.66345	-155.829	-17.7826	120.264
3253.02	-5.81599	-161.481	-23.8635	113.754
3253.14	-6.92598	-168.701	-31.8373	105.027
3253.25	-7.98529	-177.604	-42.0273	93.5499
3253.37	-8.98618	-188.072	-54.6065	78.8594
3253.48	-9.92133	-199.63	-69.4546	60.7212
3253.6	-10.7839	-211.368	-86.0004	39.3673
3253.71	-11.5676	-221.979	-103.1	15.7794
3253.83	-12.2666	-229.991	-119.019	-8.04798
3253.94	-12.876	-234.177	-131.587	-28.9965
3254.06	-13.3911	-233.977	-138.537	-43.097
3254.17	-13.8083	-229.485	-138.007	-46.5292
3254.29	-14.1245	-220.712	-129.042	-37.3721
3254.41	-14.3373	-207.02	-111.958	-16.8952
3254.52	-14.4453	-187.855	-88.4058	11.0436
3254.64	-14.4476	-163.995	-61.0948	41.8059
3254.75	-14.3442	-137.952	-33.2367	71.4787
3254.87	-14.1359	-113.375	-7.88595	97.6033
3254.98	-13.8242	-93.8993	12.6383	119.176
3255.1	-13.4114	-81.9026	27.0912	136.085
3255.21	-12.9005	-77.7723	35.346	148.464
3255.33	-12.2952	-80.1187	38.1788	156.476
3255.44	-11.5999	-86.6779	36.9061	160.49
3255.56	-10.8198	-95.2171	33.0017	161.22
3255.67	-9.96058	-104.039	27.796	159.631
3255.79	-9.02846	-112.103	22.3052	156.713
3255.9	-8.03029	-118.921	17.1849	153.291
3256.02	-6.97337	-124.389	12.7725	149.934
3256.13	-5.86543	-128.617	9.17075	146.958
3256.25	-4.71457	-131.809	6.33627	144.482
3256.36	-3.52921	-134.193	4.15238	142.498
3256.48	-2.31802	-135.978	2.47789	140.934
3256.59	-1.08985	-137.341	1.17466	139.691
3256.71	0.146306	-138.429	0.119243	138.667
3256.83	1.38142	-139.36	-0.795724	137.769
3256.94	2.60645	-140.237	-1.66586	136.905
3257.06	3.81244	-141.153	-2.58238	135.988
3257.17	4.99057	-142.204	-3.64118	134.921
3257.29	6.13222	-143.498	-4.95306	133.592
3257.4	7.22905	-145.167	-6.65492	131.857
3257.52	8.27303	-147.373	-8.92134	129.531
3257.63	9.25653	-150.318	-11.9751	126.368
3257.75	10.1724	-154.24	-16.093	122.054
3257.86	11.0138	-159.397	-21.6012	116.195
3257.98	11.7747	-166.028	-28.8511	108.326
3258.09	12.4496	-174.279	-38.165	97.9495
3258.21	13.0334	-184.103	-49.7431	84.6167
3258.32	13.5219	-195.136	-63.5331	68.0697
3258.44	13.9115	-206.615	-79.0802	48.455
3258.55	14.1994	-217.386	-95.4003	26.5856
3258.67	14.3835	-226.072	-110.941	4.19029
3258.78	14.4625	-231.418	-123.693	-15.9682
3258.9	14.4356	-232.665	-131.488	-30.311
3259.01	14.3033	-229.631	-132.447	-35.2639
3259.13	14.0663	-222.238	-125.475	-28.7126
3259.24	13.7265	-210.026	-110.637	-11.2484
3259.36	13.2863	-192.574	-89.2803	14.0133
3259.48	12.749	-170.5	-63.8233	42.8532
3259.59	12.1185	-145.944	-37.2706	71.4025
3259.71	11.3993	-122.169	-12.5891	96.9907
3259.82	10.5968	-102.585	7.86567	118.316
3259.94	9.71687	-89.6264	22.7175	135.061
3260.05	8.76586	-84.0019	31.6608	147.324
3260.17	7.75077	-84.7294	35.2946	155.319
3260.28	6.67901	-89.8499	34.7954	159.441
3260.4	5.55843	-97.2676	31.5509	160.369
3260.51	4.39722	-105.295	26.8568	159.008
3260.63	3.20387	-112.834	21.7323	156.298
3260.74	1.98711	-119.325	16.8575	153.04
3260.86	0.755845	-124.598	12.6013	149.8
3260.97	-0.480928	-128.711	9.09571	146.902
3261.09	-1.71416	-131.836	6.32074	144.477
3261.2	-2.93484	-134.176	4.17621	142.529
3261.32	-4.13403	-135.929	2.53189	140.992
3261.43	-5.30297	-137.263	1.25679	139.776
3261.55	-6.4331	-138.319	0.232389	138.784
3261.66	-7.51616	-139.212	-0.644644	137.923
3261.78	-8.54423	-140.04	-1.46576	137.109
3261.89	-9.50979	-140.892	-2.31706	136.258
3262.01	-10.4058	-141.857	-3.28765	135.281
3262.13	-11.2256	-143.034	-4.47904	134.076
3262.24	-11.9634	-144.544	-6.01568	132.513
3262.36	-12.6136	-146.535	-8.05587	130.424
3262.47	-13.1716	-149.194	-10.8021	127.589
3262.59	-13.6332	-152.74	-14.5076	123.725
3262.7	-13.9951	-157.422	-19.4746	118.473
3262.82	-14.2546	-163.478	-26.0351	111.408
3262.93	-14.4098	-171.079	-34.5053	102.068
3263.05	-14.4597	-180.233	-45.1048	90.0234
3263.16	-14.4037	-190.677	-57.8381	75.0004
3263.28	-14.2424	-201.782	-72.354	57.0738
3263.39	-13.9769	-212.539	-87.8173	36.9046
3263.51	-13.6092	-221.681	-102.852	15.9765
3263.62	-13.1419	-227.956	-115.618	-3.28109
3263.74	-12.5785	-230.465	-124.061	-17.6573
3263.85	-11.9231	-228.804	-126.317	-23.831
3263.97	-11.1805	-222.78	-121.183	-19.585
3264.08	-10.356	-212.035	-108.502	-4.96884
3264.2	-9.45583	-196.256	-89.3333	17.5896
3264.31	-8.48646	-175.951	-65.8051	44.3405
3264.43	-7.45501	-152.943	-40.6965	71.5501
3264.55	-6.36901	-130.135	-16.8581	96.4194
3264.66	-5.23641	-110.699	3.34917	117.397
3264.78	-4.06549	-97.0669	18.444	133.955
3264.89	-2.86482	-90.1938	27.9583	146.11
3265.01	-1.64317	-89.4587	32.3187	154.096
3265.12	-0.409484	-93.2077	32.5577	158.323
3265.24	0.827217	-99.5102	29.9669	159.444
3265.35	2.05789	-106.717	25.7961	158.309
3265.47	3.27354	-113.697	21.0583	155.813
3265.58	4.46526	-119.828	16.4511	152.73
3265.7	5.62435	-124.877	12.371	149.619
3265.81	6.74233	-128.854	8.97772	146.809
3265.93	7.81103	-131.896	6.27442	144.445
3266.04	8.82262	-134.183	4.17784	142.538
3266.16	9.7697	-135.896	2.5694	141.035
3266.27	10.6454	-137.198	1.32582	139.849
3266.39	11.4432	-138.22	0.333969	138.888
3266.5	12.1574	-139.076	-0.505203	138.065
3266.62	12.7826	-139.857	-1.27893	137.299
3266.73	13.3144	-140.647	-2.06837	136.511
3266.85	13.7489	-141.531	-2.95616	135.619
3266.96	14.0828	-142.599	-4.03514	134.529
3267.08	14.3138	-143.96	-5.41807	133.124
3267.2	14.4401	-145.751	-7.24791	131.255
3267.31	14.4608	-148.14	-9.7078	128.724
3267.43	14.3757	-151.332	-13.0283	125.276
3267.54	14.1856	-155.562	-17.4874	120.587
3267.66	13.8917	-161.063	-23.3961	114.271
3267.77	13.4963	-168.023	-31.0607	105.901
3267.89	13.0022	-176.495	-40.7128	95.0692
3268	12.413	-186.301	-52.4035	81.494
3268.12	11.733	-196.935	-65.8722	65.1907
3268.23	10.9673	-207.528	-80.4207	46.6862
3268.35	10.1214	-216.925	-94.8422	27.2404
3268.46	9.20147	-223.909	-107.468	8.97384
3268.58	8.21427	-227.493	-116.371	-5.24913
3268.69	7.16703	-227.093	-119.729	-12.3649
3268.81	6.06739	-222.4	-116.262	-10.1244
3268.92	4.9234	-213.094	-105.625	1.84424
3269.04	3.74342	-198.944	-88.6064	21.7313
3269.15	2.53609	-180.379	-67.0493	46.2805
3269.27	1.31023	-158.957	-43.4946	71.9674
3269.38	0.0748112	-137.248	-20.6526	95.9429
3269.5	-1.16113	-118.178	-0.859651	116.459
3269.62	-2.38856	-104.135	14.3245	132.784
3269.73	-3.5985	-96.2545	24.2876	144.83
3269.85	-4.7821	-94.2266	29.2917	152.81
3269.96	-5.93071	-96.6928	30.2236	157.14
3270.08	-7.03592	-101.906	28.271	158.448
3270.19	-8.08965	-108.283	24.6281	157.539
3270.31	-9.0842	-114.678	20.2918	155.262
3270.42	-10.0123	-120.42	15.9707	152.362
3270.54	-10.8671	-125.221	12.0843	149.39
3270.65	-11.6425	-129.044	8.81826	146.681
3270.77	-12.3327	-131.989	6.19804	144.385
3270.88	-12.9326	-134.213	4.1576	142.528
3271	-13.438	-135.882	2.59048	141.063
3271.11	-13.845	-137.146	1.38168	139.909
3271.23	-14.1508	-138.134	0.42382	138.982
3271.34	-14.3531	-138.951	-0.377615	138.196
3271.46	-14.4504	-139.687	-1.10561	137.475
3271.57	-14.4419	-140.419	-1.83653	136.746
3271.69	-14.3279	-141.227	-2.6469	135.933
3271.8	-14.109	-142.192	-3.62146	134.95
3271.92	-13.7869	-143.416	-4.86208	133.692
3272.03	-13.364	-145.02	-6.49736	132.025
3272.15	-12.8433	-147.158	-8.69221	129.774
3272.27	-12.2287	-150.019	-11.6553	126.709
3272.38	-11.5246	-153.821	-15.6408	122.54
3272.5	-10.7362	-158.792	-20.9377	116.917
3272.61	-9.86924	-165.127	-27.8392	109.448
3272.73	-8.9301	-172.915	-36.5826	99.7498
3272.84	-7.92563	-182.051	-47.2557	87.5396
3272.96	-6.86317	-192.137	-59.6765	72.7841
3273.07	-5.7505	-202.435	-73.2706	55.8937
3273.19	-4.59576	-211.909	-86.9912	37.9267
3273.3	-3.40738	-219.398	-99.3391	20.72
3273.42	-2.19405	-223.867	-108.527	6.81295
3273.53	-0.964665	-224.599	-112.794	-0.989314
3273.65	0.2718	-221.171	-110.816	-0.46189
3273.76	1.5063	-213.262	-102.089	9.08517
3273.88	2.7298	-200.691	-87.1542	26.383
3273.99	3.93337	-183.828	-67.579	48.6699
3274.11	5.10819	-164.007	-45.6591	72.6884
3274.22	6.24567	-143.497	-23.9436	95.6098
3274.34	7.33749	-124.979	-4.71766	115.544
3274.45	8.37568	-110.761	10.4075	131.576
3274.57	9.35263	-102.103	20.6952	143.493
3274.68	10.2612	-98.9589	26.2536	151.466
3274.8	11.0948	-100.248	27.8244	155.896
3274.92	11.8472	-104.416	26.4861	157.388
3275.03	12.513	-109.968	23.368	156.704
3275.15	13.0873	-115.763	19.4427	154.648
3275.26	13.566	-121.095	15.4222	151.939
3275.38	13.9454	-125.627	11.7449	149.117
3275.49	14.2229	-129.278	8.61933	146.517
3275.61	14.3963	-132.114	6.09269	144.299
3275.72	14.4645	-134.265	4.11605	142.498
3275.84	14.427	-135.883	2.5954	141.074
3275.95	14.284	-137.108	1.42444	139.957
3276.07	14.0365	-138.059	0.501925	139.063
3276.18	13.6863	-138.838	-0.261953	138.314
3276.3	13.2362	-139.53	-0.945887	137.638
3276.41	12.6892	-140.208	-1.62157	136.964
3276.53	12.0494	-140.944	-2.35981	136.224
3276.64	11.3216	-141.815	-3.23778	135.34
3276.76	10.511	-142.911	-4.34725	134.217
3276.87	9.62349	-144.343	-5.8035	132.736
3276.99	8.66565	-146.249	-7.75431	130.74
3277.1	7.64446	-148.801	-10.3876	128.026
3277.22	6.56739	-152.202	-13.9342	124.334
3277.34	5.44231	-156.67	-18.6608	119.348
3277.45	4.27744	-162.402	-24.8449	112.712
3277.57	3.08132	-169.515	-32.7242	104.067
3277.68	1.86268	-177.963	-42.4144	93.1343
3277.8	0.630445	-187.443	-53.8	79.843
3277.91	-0.606383	-197.339	-66.4176	64.5035
3278.03	-1.83875	-206.733	-79.3693	47.9947
3278.14	-3.05765	-214.538	-91.3215	31.8953
3278.26	-4.25417	-219.707	-100.632	18.4421
3278.37	-5.41956	-221.43	-105.623	10.1839
3278.49	-6.54528	-219.18	-104.951	9.27855
3278.6	-7.62312	-212.61	-97.9825	16.6454
3278.72	-8.64518	-201.56	-85.0415	31.4775
3278.83	-9.604	-186.35	-67.4299	51.4906
3278.95	-10.4926	-168.127	-47.1966	73.7338
3279.06	-11.3044	-148.889	-26.7139	95.4612
3279.18	-12.0335	-131.075	-8.19086	114.694
3279.29	-12.6745	-116.891	6.73511	130.361
3279.41	-13.2229	-107.671	17.2242	142.12
3279.52	-13.6745	-103.589	23.2428	150.075
3279.64	-14.0261	-103.817	25.3914	154.6
3279.75	-14.2751	-107	24.6357	156.271
3279.87	-14.4197	-111.744	22.0326	155.809
3279.99	-14.4588	-116.934	18.522	153.978
3280.1	-14.3922	-121.842	14.8128	151.467
3280.22	-14.2202	-126.089	11.3569	148.803
3280.33	-13.9443	-129.554	8.38346	146.321
3280.45	-13.5663	-132.268	5.95987	144.188
3280.56	-13.0891	-134.34	4.05405	142.448
3280.68	-12.5162	-135.902	2.58465	141.071
3280.79	-11.8517	-137.083	1.45438	139.991
3280.91	-11.1005	-137.996	0.568409	139.133
3281.02	-10.2681	-138.737	-0.15815	138.421
3281.14	-9.36054	-139.386	-0.799685	137.787
3281.25	-8.38454	-140.012	-1.42338	137.166
3281.37	-7.3472	-140.682	-2.09463	136.493
3281.48	-6.2561	-141.466	-2.8836	135.699
3281.6	-5.11923	-142.445	-3.87277	134.699
3281.71	-3.9449	-143.718	-5.16506	133.388
3281.83	-2.74169	-145.41	-6.89238	131.625
3281.94	-1.51842	-147.677	-9.22302	129.231
3282.06	-0.284014	-150.705	-12.3655	125.974
3282.17	0.952488	-154.7	-16.564	121.572
3282.29	2.18205	-159.857	-22.0785	115.7
3282.41	3.39567	-166.312	-29.1427	108.027
3282.52	4.58448	-174.067	-37.8925	98.2819
3282.64	5.73978	-182.901	-48.2677	86.3655
3282.75	6.85313	-192.308	-59.9025	72.5035
3282.87	7.91637	-201.49	-72.0362	57.4171
3282.98	8.92175	-209.441	-83.4943	42.4522
3283.1	9.8619	-215.132	-92.783	29.5659
3283.21	10.7299	-217.696	-98.32	21.0563
3283.33	11.5195	-216.522	-98.77	18.9819
3283.44	12.2249	-211.218	-93.4004	24.417
3283.56	12.8409	-201.623	-82.3417	36.9393
3283.67	13.363	-188.009	-66.6488	54.7112
3283.79	13.7874	-171.364	-48.126	75.1119
3283.9	14.111	-153.444	-28.9573	95.5294
3284.02	14.3314	-136.457	-11.2547	113.948
3284.13	14.447	-122.486	3.3426	129.171
3284.25	14.4569	-112.904	13.9131	140.73
3284.36	14.3612	-108.058	20.2958	148.65
3284.48	14.1605	-107.351	22.9554	153.262
3284.59	13.8562	-109.619	22.7435	155.106
3284.71	13.4506	-113.585	20.6389	154.863
3284.82	12.9467	-118.175	17.5415	153.258
3284.94	12.348	-122.649	14.15	150.949
3285.06	11.6592	-126.599	10.9252	148.45
3285.17	10.885	-129.866	8.11364	146.093
3285.29	10.0313	-132.45	5.80138	144.052
3285.4	9.10424	-134.434	3.97269	142.379
3285.52	8.11062	-135.935	2.55887	141.053
3285.63	7.0577	-137.07	1.47187	140.014
3285.75	5.95319	-137.944	0.623525	139.191
3285.86	4.80516	-138.648	-0.0660146	138.516
3285.98	3.62201	-139.256	-0.666802	137.922
3286.09	2.41239	-139.833	-1.24166	137.35
3286.21	1.18515	-140.442	-1.85088	136.74
3286.32	-0.0507326	-141.145	-2.55817	136.029
3286.44	-1.28622	-142.017	-3.43746	135.142
3286.55	-2.51229	-143.144	-4.58034	133.984
3286.67	-3.71996	-144.64	-6.10401	132.432
3286.78	-4.9004	-146.645	-8.15849	130.328
3286.9	-6.04498	-149.329	-10.931	127.467
3287.01	-7.14533	-152.882	-14.6435	123.595
3287.13	-8.1934	-157.496	-19.5375	118.421
3287.24	-9.18153	-163.318	-25.8389	111.64
3287.36	-10.1025	-170.386	-33.6969	102.992
3287.47	-10.9495	-178.55	-43.0965	92.3573
3287.59	-11.7165	-187.405	-53.7566	79.8915
3287.71	-12.3977	-196.261	-65.0411	66.1789
3287.82	-12.9883	-204.209	-75.9259	52.357
3287.94	-13.4838	-210.257	-85.0654	40.1264
3288.05	-13.8807	-213.512	-90.9845	31.5434
3288.17	-14.1761	-213.297	-92.3766	28.5438
3288.28	-14.3678	-209.172	-88.4383	32.2952
3288.4	-14.4544	-200.956	-79.1341	42.6873
3288.51	-14.4352	-188.872	-65.2915	58.2893
3288.63	-14.3104	-173.772	-48.4768	76.8184
3288.74	-14.081	-157.194	-30.6785	95.8372
3288.86	-13.7486	-141.129	-13.8944	113.34
3288.97	-13.3156	-127.524	0.257669	128.04
3289.09	-12.7852	-117.76	10.7954	139.35
3289.2	-12.1612	-112.318	17.4456	147.209
3289.32	-11.4484	-110.802	20.5457	151.894
3289.43	-10.6517	-112.236	20.8331	153.902
3289.55	-9.77715	-115.465	19.2046	153.874
3289.66	-8.83106	-119.467	16.5135	152.494
3289.78	-7.82037	-123.507	13.4421	150.391
3289.89	-6.75246	-127.152	10.4552	148.062
3290.01	-5.63514	-130.211	7.81327	145.838
3290.13	-4.47659	-132.656	5.61935	143.895
3290.24	-3.28528	-134.547	3.87329	142.294
3290.36	-2.06992	-135.983	2.51889	141.021
3290.47	-0.839404	-137.069	1.47746	140.024
3290.59	0.397274	-137.904	0.667647	139.239
3290.7	1.63107	-138.57	0.0147619	138.599
3290.82	2.85296	-139.138	-0.546915	138.044
3290.93	4.054	-139.67	-1.07597	137.518
3291.05	5.22542	-140.222	-1.62794	136.966
3291.16	6.35864	-140.852	-2.26054	136.33
3291.28	7.44538	-141.625	-3.03989	135.545
3291.39	8.4777	-142.62	-4.04724	134.526
3291.51	9.44803	-143.938	-5.3863	133.165
3291.62	10.3493	-145.704	-7.19011	131.323
3291.74	11.1749	-148.07	-9.62583	128.819
3291.85	11.9188	-151.215	-12.8939	125.427
3291.97	12.5755	-155.32	-17.2167	120.887
3292.08	13.1403	-160.539	-22.8097	114.919
3292.2	13.609	-166.937	-29.8292	107.278
3292.31	13.9782	-174.423	-38.2962	97.8309
3292.43	14.2452	-182.679	-48.0021	86.6747
3292.54	14.4081	-191.121	-58.4226	74.2762
3292.66	14.4655	-198.937	-68.6738	61.589
3292.78	14.4173	-205.191	-77.5554	50.08
3292.89	14.2636	-208.989	-83.7066	41.5752
3293.01	14.0056	-209.608	-85.8681	37.872
3293.12	13.6452	-206.564	-83.1912	40.1812
3293.24	13.185	-199.642	-75.5017	48.6385
3293.35	12.6284	-189.016	-63.4211	62.1735
3293.47	11.9795	-175.413	-48.2878	78.8376
3293.58	11.243	-160.182	-31.8925	96.3974
3293.7	10.4243	-145.107	-16.104	112.899
3293.81	9.52938	-131.996	-2.49964	126.997
3293.93	8.56479	-122.208	7.89863	138.005
3294.04	7.53759	-116.328	14.7221	145.772
3294.16	6.45528	-114.132	18.1895	150.511
3294.27	5.32578	-114.818	18.9273	152.672
3294.39	4.15735	-117.357	17.7472	152.852
3294.5	2.95854	-120.793	15.4507	151.694
3294.62	1.73811	-124.403	12.698	149.799
3294.73	0.504997	-127.739	9.95266	147.644
3294.85	-0.731791	-130.585	7.48608	145.557
3294.96	-1.9632	-132.885	5.41616	143.717
3295.08	-3.18024	-134.677	3.75737	142.192
3295.2	-4.37399	-136.044	2.46571	140.976
3295.31	-5.53574	-137.08	1.47181	140.024
3295.43	-6.65698	-137.873	0.701255	139.276
3295.54	-7.72951	-138.502	0.0845891	138.671
3295.66	-8.74549	-139.033	-0.43959	138.153
3295.77	-9.69749	-139.522	-0.925786	137.67
3295.89	-10.5785	-140.021	-1.42503	137.171
3296	-11.3822	-140.584	-1.98958	136.605
3296.12	-12.1026	-141.268	-2.6784	135.911
3296.23	-12.7345	-142.144	-3.56337	135.017
3296.35	-13.2732	-143.3	-4.73587	133.828
3296.46	-13.7148	-144.848	-6.31336	132.221
3296.58	-14.0561	-146.926	-8.44425	130.038
3296.69	-14.2946	-149.696	-11.3084	127.079
3296.81	-14.4285	-153.328	-15.1088	123.111
3296.92	-14.4569	-157.978	-20.0483	117.881
3297.04	-14.3795	-163.731	-26.2859	111.159
3297.15	-14.197	-170.544	-33.8698	102.804
3297.27	-13.9106	-178.173	-42.6528	92.8672
3297.38	-13.5224	-186.133	-52.2091	81.7149
3297.5	-13.0353	-193.708	-61.7843	70.1393
3297.61	-12.4529	-200.032	-70.3178	59.3966
3297.73	-11.7793	-204.231	-76.5675	51.0961
3297.85	-11.0196	-205.559	-79.3356	46.8873
3297.96	-10.1793	-203.488	-77.7515	47.9845
3298.08	-9.26454	-197.768	-71.5289	54.71
3298.19	-8.28198	-188.517	-61.1055	66.3065
3298.31	-7.23883	-176.355	-47.6056	81.1444
3298.42	-6.14272	-162.458	-32.6227	97.2129
3298.54	-5.00167	-148.419	-17.887	112.645
3298.65	-3.82401	-135.904	-4.91701	126.07
3298.77	-2.61837	-126.231	5.24478	136.721
3298.88	-1.39355	-120.057	12.1507	144.358
3299	-0.158522	-117.305	15.9119	149.128
3299.11	1.07769	-117.333	17.0476	151.428
3299.23	2.30604	-119.239	16.2838	151.806
3299.34	3.51754	-122.135	14.3658	150.867
3299.46	4.70334	-125.325	11.9264	149.178
3299.57	5.85477	-128.353	9.42365	147.2
3299.69	6.9634	-130.982	7.13608	145.254
3299.8	8.02113	-133.132	5.19442	143.521
3299.92	9.02021	-134.822	3.62662	142.076
3300.03	9.95335	-136.118	2.40042	140.919
3300.15	10.8137	-137.101	1.45569	140.012
3300.27	11.595	-137.853	0.724923	139.303
3300.38	12.2915	-138.445	0.143965	138.733
3300.5	12.8982	-138.939	-0.344306	138.251
3300.61	13.4105	-139.388	-0.790444	137.807
3300.73	13.8248	-139.839	-1.24127	137.357
3300.84	14.138	-140.341	-1.74401	136.853
3300.96	14.3479	-140.944	-2.35117	136.242
3301.07	14.4528	-141.713	-3.12611	135.46
3301.19	14.452	-142.723	-4.14907	134.425
3301.3	14.3456	-144.075	-5.52326	133.028
3301.42	14.1343	-145.891	-7.37973	131.132
3301.53	13.8196	-148.318	-9.87886	128.56
3301.65	13.4039	-151.516	-13.2045	125.107
3301.76	12.8901	-155.634	-17.5456	120.543
3301.88	12.2822	-160.774	-23.0596	114.655
3301.99	11.5844	-166.928	-29.8147	107.299
3302.11	10.8019	-173.919	-37.7146	98.4895
3302.22	9.94046	-181.348	-46.4195	88.5093
3302.34	9.00633	-188.595	-55.2927	78.0099
3302.45	8.00635	-194.871	-63.4062	68.0589
3302.57	6.94784	-199.339	-69.6376	60.0642
3302.68	5.83853	-201.247	-72.862	55.5235
3302.8	4.68655	-200.038	-72.207	55.6236
3302.92	3.50032	-195.42	-67.299	60.8224
3303.03	2.28851	-187.458	-58.4157	70.627
3303.15	1.05998	-176.67	-46.4826	83.7052
3303.26	-0.176272	-164.079	-32.9006	98.2775
3303.38	-1.41122	-151.101	-19.2546	112.592
3303.49	-2.63582	-139.261	-6.98957	125.281
3303.61	-3.84113	-129.821	2.8495	135.52
3303.72	-5.01832	-123.484	9.75245	142.989
3303.84	-6.15879	-120.294	13.7346	147.764
3303.95	-7.2542	-119.756	15.214	150.184
3304.07	-8.29653	-121.087	14.8308	150.748
3304.18	-9.27816	-123.477	13.2712	150.02
3304.3	-10.1919	-126.262	11.1365	148.535
3304.41	-11.0311	-128.986	8.87439	146.735
3304.53	-11.7896	-131.397	6.76744	144.932
3304.64	-12.4619	-133.396	4.95687	143.309
3304.76	-13.043	-134.981	3.48286	141.946
3304.87	-13.5287	-136.202	2.32426	140.851
3304.99	-13.9154	-137.132	1.42993	139.991
3305.1	-14.2003	-137.841	0.739304	139.32
3305.22	-14.3814	-138.398	0.193465	138.785
3305.33	-14.4573	-138.857	-0.260463	138.336
3305.45	-14.4274	-139.268	-0.669221	137.93
3305.57	-14.2919	-139.675	-1.07569	137.524
3305.68	-14.052	-140.121	-1.52247	137.076
3305.8	-13.7092	-140.653	-2.05623	136.54
3305.91	-13.2662	-141.324	-2.73268	135.858
3306.03	-12.7261	-142.204	-3.62201	134.96
3306.14	-12.0929	-143.379	-4.81447	133.75
3306.26	-11.3713	-144.96	-6.42522	132.109
3306.37	-10.5664	-147.076	-8.59638	129.884
3306.49	-9.68433	-149.876	-11.4933	126.89
3306.6	-8.73136	-153.504	-15.29	122.924
3306.72	-7.71452	-158.066	-20.1392	117.788
3306.83	-6.64123	-163.586	-26.1231	111.34
3306.95	-5.51935	-169.94	-33.1866	103.567
3307.06	-4.35709	-176.809	-41.064	94.6805
3307.18	-3.16294	-183.66	-49.2242	85.2116
3307.29	-1.94563	-189.788	-56.8632	76.0611
3307.41	-0.71408	-194.404	-62.9767	68.4509
3307.52	0.522718	-196.77	-66.521	63.728
3307.64	1.75572	-196.306	-66.6391	63.0282
3307.75	2.97589	-192.687	-62.8931	66.9012
3307.87	4.17433	-185.92	-55.4239	75.0727
3307.99	5.34226	-176.432	-44.9755	86.4807
3308.1	6.47114	-165.105	-32.7639	99.5769
3308.22	7.55271	-153.194	-20.2253	112.744
3308.33	8.57907	-142.087	-8.71949	124.648
3308.45	9.54271	-132.979	0.722433	134.424
3308.56	10.4366	-126.596	7.5439	141.684
3308.68	11.2542	-123.079	11.6767	146.433
3308.79	11.9894	-122.063	13.4443	148.952
3308.91	12.6371	-122.881	13.4034	149.688
3309.02	13.1923	-124.804	12.1791	149.162
3309.14	13.651	-127.203	10.337	147.877
3309.25	14.01	-129.631	8.31115	146.253
3309.37	14.2665	-131.826	6.38444	144.595
3309.48	14.4187	-133.671	4.70641	143.084
3309.6	14.4654	-135.149	3.32802	141.805
3309.71	14.4064	-136.296	2.23852	140.773
3309.83	14.2421	-137.171	1.39549	139.962
3309.94	13.9736	-137.839	0.745115	139.329
3310.06	13.603	-138.359	0.233722	138.827
3310.17	13.1328	-138.785	-0.187402	138.411
3310.29	12.5667	-139.162	-0.561327	138.039
3310.4	11.9087	-139.528	-0.927238	137.674
3310.52	11.1636	-139.924	-1.32351	137.277
3310.64	10.3369	-140.39	-1.79155	136.807
3310.75	9.43456	-140.975	-2.38021	136.215
3310.87	8.46329	-141.739	-3.15065	135.437
3310.98	7.43014	-142.757	-4.18148	134.394
3311.1	6.34267	-144.126	-5.57334	132.979
3311.21	5.20884	-145.963	-7.45146	131.06
3311.33	4.03694	-148.402	-9.9634	128.475
3311.44	2.83553	-151.579	-13.268	125.043
3311.56	1.61341	-155.605	-17.511	120.583
3311.67	0.379511	-160.522	-22.7831	114.956
3311.79	-0.857143	-166.252	-29.0618	108.128
3311.9	-2.08751	-172.545	-36.1447	100.255
3312.02	-3.30258	-178.952	-43.594	91.7635
3312.13	-4.49349	-184.848	-50.7203	83.4074
3312.25	-5.6515	-189.507	-56.6336	76.2399
3312.36	-6.76817	-192.214	-60.3764	71.4609
3312.48	-7.83531	-192.382	-61.1216	70.1387
3312.59	-8.84513	-189.654	-58.3877	72.8785
3312.71	-9.79024	-183.984	-52.2012	79.5821
3312.82	-10.6637	-175.714	-43.1433	89.4272
3312.94	-11.4592	-165.6	-32.2551	101.09
3313.06	-12.1709	-154.748	-20.8239	113.1
3313.17	-12.7935	-144.413	-10.1154	124.182
3313.29	-13.3225	-135.714	-1.13261	133.449
3313.4	-13.7541	-129.386	5.53672	140.459
3313.52	-14.0851	-125.645	9.75338	145.152
3313.63	-14.313	-124.237	11.7544	147.746
3313.75	-14.4362	-124.606	12.0157	148.638
3313.86	-14.4539	-126.101	11.1007	148.302
3313.98	-14.3658	-128.137	9.53666	147.21
3314.09	-14.1726	-130.28	7.74012	145.76
3314.21	-13.8758	-132.263	5.99141	144.246
3314.32	-13.4774	-133.957	4.44596	142.848
3314.44	-12.9805	-135.327	3.16408	141.655
3314.55	-12.3886	-136.398	2.14458	140.687
3314.67	-11.7061	-137.217	1.35332	139.924
3314.78	-10.938	-137.843	0.743122	139.329
3314.9	-10.0898	-138.329	0.265417	138.86
3315.01	-9.16784	-138.724	-0.124417	138.475
3315.13	-8.1788	-139.068	-0.465921	138.136
3315.24	-7.12992	-139.397	-0.794824	137.808
3315.36	-6.02888	-139.748	-1.14564	137.457
3315.47	-4.88373	-140.156	-1.55504	137.046
3315.59	-3.70284	-140.664	-2.06575	136.532
3315.71	-2.49484	-141.324	-2.7309	135.862
3315.82	-1.26858	-142.202	-3.61865	134.965
3315.94	-0.0330181	-143.383	-4.81654	133.75
3316.05	1.20281	-144.97	-6.43424	132.102
3316.17	2.42985	-147.084	-8.60259	129.879
3316.28	3.63915	-149.852	-11.4653	126.921
3316.4	4.82186	-153.382	-15.1591	123.064
3316.51	5.96932	-157.733	-19.7793	118.175
3316.63	7.07315	-162.862	-25.3283	112.206
3316.74	8.12527	-168.578	-31.6568	105.264
3316.86	9.11799	-174.508	-38.4087	97.6905
3316.97	10.044	-180.108	-44.9988	90.1109
3317.09	10.8967	-184.718	-50.6462	83.4257
3317.2	11.6696	-187.658	-54.4819	78.6944
3317.32	12.3572	-188.346	-55.7197	76.907
3317.43	12.9545	-186.402	-53.8534	78.6948
3317.55	13.4571	-181.729	-48.8164	84.0966
3317.66	13.8612	-174.591	-41.0459	92.4987
3317.78	14.164	-165.629	-31.4202	102.789
3317.89	14.3633	-155.813	-21.0802	113.653
3318.01	14.4575	-146.271	-11.1916	123.888
3318.12	14.446	-138.044	-2.71727	132.609
3318.24	14.3289	-131.856	3.738	139.332
3318.36	14.107	-127.982	7.97649	143.935
3318.47	13.782	-126.264	10.1574	146.579
3318.59	13.3561	-126.247	10.6801	147.607
3318.7	12.8327	-127.357	10.0465	147.45
3318.82	12.2154	-129.055	8.74357	146.542
3318.93	11.5088	-130.927	7.16729	145.261
3319.05	10.718	-132.704	5.59256	143.889
3319.16	9.84887	-134.248	4.17845	142.604
3319.28	8.90773	-135.511	2.99305	141.497
3319.39	7.90147	-136.506	2.04383	140.593
3319.51	6.83745	-137.27	1.30446	139.879
3319.62	5.72344	-137.855	0.734124	139.323
3319.74	4.5676	-138.307	0.289266	138.886
3319.85	3.37837	-138.671	-0.0707693	138.53
3319.97	2.16446	-138.985	-0.382137	138.22
3320.08	0.934738	-139.281	-0.677332	137.926
3320.2	-0.301798	-139.591	-0.987349	137.616
3320.31	-1.53611	-139.947	-1.34461	137.258
3320.43	-2.75916	-140.387	-1.78639	136.814
3320.54	-3.96201	-140.955	-2.35869	136.238
3320.66	-5.13586	-141.71	-3.12038	135.469
3320.78	-6.27214	-142.724	-4.14721	134.43
3320.89	-7.36252	-144.089	-5.53473	133.02
3321.01	-8.39903	-145.913	-7.39815	131.116
3321.12	-9.3741	-148.31	-9.86635	128.577
3321.24	-10.2806	-151.388	-13.0662	125.256
3321.35	-11.1119	-155.214	-17.0935	121.027
3321.47	-11.8619	-159.772	-21.97	115.832
3321.58	-12.5251	-164.92	-27.5895	109.741
3321.7	-13.0967	-170.357	-33.6669	103.023
3321.81	-13.5725	-175.613	-39.7106	96.1919
3321.93	-13.949	-180.096	-45.042	90.0124
3322.04	-14.2235	-183.173	-48.8806	85.4122
3322.16	-14.3939	-184.276	-50.4898	83.2963
3322.27	-14.4591	-183.007	-49.3543	84.2987
3322.39	-14.4184	-179.231	-45.3343	88.5619
3322.5	-14.2724	-173.134	-38.7424	95.6492
3322.62	-14.0219	-165.257	-30.3069	104.643
3322.73	-13.6688	-156.444	-21.0278	114.388
3322.85	-13.2158	-147.701	-11.9674	123.766
3322.96	-12.666	-139.989	-4.03816	131.913
3323.08	-12.0237	-134.012	2.15039	138.313
3323.19	-11.2933	-130.086	6.35431	142.795
3323.31	-10.4804	-128.135	8.66403	145.463
3323.43	-9.59078	-127.792	9.40725	146.607
3323.54	-8.631	-128.56	9.02592	146.612
3323.66	-7.60808	-129.948	7.96529	145.879
3323.77	-6.5295	-131.564	6.59839	144.761
3323.89	-5.40315	-133.144	5.19203	143.528
3324	-4.23726	-134.541	3.90677	142.355
3324.12	-3.04036	-135.7	2.81693	141.334
3324.23	-1.8212	-136.619	1.93768	140.494
3324.35	-0.588701	-137.329	1.24992	139.829
3324.46	0.648124	-137.872	0.718941	139.31
3324.58	1.88023	-138.292	0.306002	138.904
3324.69	3.09861	-138.627	-0.0257017	138.576
3324.81	4.29434	-138.913	-0.309091	138.294
3324.92	5.4587	-139.178	-0.573635	138.031
3325.04	6.58315	-139.451	-0.847122	137.757
3325.15	7.65947	-139.762	-1.15817	137.445
3325.27	8.67981	-140.141	-1.53924	137.063
3325.38	9.63668	-140.629	-2.03002	136.569
3325.5	10.5231	-141.275	-2.68114	135.913
3325.61	11.3326	-142.143	-3.55788	135.027
3325.73	12.0592	-143.312	-4.74298	133.826
3325.85	12.6976	-144.877	-6.33729	132.202
3325.96	13.2433	-146.943	-8.45547	130.032
3326.08	13.692	-149.611	-11.2137	127.184
3326.19	14.0407	-152.953	-14.706	123.541
3326.31	14.2867	-156.976	-18.9675	119.041
3326.42	14.4282	-161.577	-23.9272	113.723
3326.54	14.4643	-166.516	-29.3605	107.795
3326.65	14.3945	-171.395	-34.859	101.677
3326.77	14.2196	-175.69	-39.8386	96.0125
3326.88	13.9406	-178.819	-43.6055	91.6077
3327	13.5597	-180.237	-45.4787	89.2801
3327.11	13.0797	-179.542	-44.9467	89.6484
3327.23	12.504	-176.559	-41.815	92.9292
3327.34	11.8369	-171.413	-36.2896	98.8336
3327.46	11.0833	-164.547	-28.9636	106.62
3327.57	10.2486	-156.692	-20.7032	115.286
3327.69	9.33903	-148.742	-12.4657	123.811
3327.8	8.36114	-141.575	-5.10628	131.363
3327.92	7.32213	-135.867	0.772441	137.412
3328.03	6.2296	-131.96	4.89166	141.743
3328.15	5.09152	-129.843	7.28231	144.408
3328.26	3.91623	-129.233	8.20616	145.645
3328.38	2.71232	-129.702	8.04724	145.796
3328.5	1.48859	-130.809	7.20869	145.226
3328.61	0.253997	-132.187	6.03871	144.265
3328.73	-0.982431	-133.579	4.79373	143.167
3328.84	-2.21165	-134.835	3.6337	142.103
3328.96	-3.42468	-135.89	2.63769	141.166
3329.07	-4.61264	-136.735	1.82752	140.39
3329.19	-5.76684	-137.392	1.19075	139.773
3329.3	-6.87885	-137.895	0.698398	139.292
3329.42	-7.94053	-138.283	0.316368	138.916
3329.53	-8.94411	-138.591	0.0115496	138.614
3329.65	-9.88226	-138.85	-0.245895	138.358
3329.76	-10.7481	-139.088	-0.482614	138.122
3329.88	-11.5353	-139.329	-0.723472	137.882
3329.99	-12.2382	-139.598	-0.993693	137.611
3330.11	-12.8515	-139.925	-1.32148	137.282
3330.22	-13.3708	-140.342	-1.74097	136.861
3330.34	-13.7923	-140.893	-2.29557	136.302
3330.45	-14.1129	-141.632	-3.04122	135.55
3330.57	-14.3303	-142.628	-4.04926	134.53
3330.68	-14.4429	-143.965	-5.40736	133.151
3330.8	-14.4498	-145.737	-7.21677	131.303
3330.91	-14.351	-148.037	-9.58279	128.871
3331.03	-14.1472	-150.939	-12.5955	125.748
3331.15	-13.84	-154.465	-16.2991	121.867
3331.26	-13.4315	-158.547	-20.6504	117.246
3331.38	-12.9247	-162.994	-25.4758	112.043
3331.49	-12.3234	-167.476	-30.4399	106.596
3331.61	-11.632	-171.535	-35.0449	101.445
3331.72	-10.8555	-174.644	-38.6803	97.2835
3331.84	-9.99954	-176.289	-40.7237	94.8419
3331.95	-9.07045	-176.069	-40.679	94.7107
3332.07	-8.075	-173.781	-38.3124	97.1562
3332.18	-7.02048	-169.492	-33.7412	102.009
3332.3	-5.91459	-163.561	-27.4382	108.685
3332.41	-4.76542	-156.613	-20.144	116.325
3332.53	-3.58138	-149.438	-12.7127	124.012
3332.64	-2.37113	-142.833	-5.9363	130.96
3332.76	-1.14351	-137.436	-0.401045	136.634
3332.87	0.0924888	-133.607	3.59009	140.787
3332.99	1.32783	-131.387	6.0177	143.423
3333.1	2.55349	-130.564	7.08381	144.732
3333.22	3.76049	-130.776	7.11744	145.011
3333.33	4.94001	-131.631	6.47986	144.591
3333.45	6.08342	-132.79	5.49311	143.776
3333.57	7.18237	-134.005	4.40129	142.808
3333.68	8.22881	-135.126	3.3619	141.85
3333.8	9.21509	-136.082	2.45721	140.996
3333.91	10.134	-136.854	1.7147	140.284
3334.03	10.9788	-137.458	1.12795	139.714
3334.14	11.7433	-137.922	0.673312	139.269
3334.26	12.422	-138.28	0.321101	138.922
3334.37	13.0099	-138.562	0.0417444	138.645
3334.49	13.5026	-138.797	-0.191673	138.413
3334.6	13.8966	-139.009	-0.403169	138.202
3334.72	14.189	-139.221	-0.614946	137.991
3334.83	14.3776	-139.455	-0.849205	137.756
3334.95	14.4611	-139.735	-1.13039	137.474
3335.06	14.4389	-140.091	-1.48782	137.115
3335.18	14.3111	-140.559	-1.95851	136.642
3335.29	14.0787	-141.186	-2.59023	136.005
3335.41	13.7433	-142.031	-3.44413	135.143
3335.52	13.3074	-143.168	-4.59601	133.976
3335.64	12.7742	-144.679	-6.13461	132.41
3335.75	12.1476	-146.651	-8.15441	130.342
3335.87	11.4322	-149.156	-10.7402	127.676
3335.98	10.6333	-152.226	-13.9413	124.344
3336.1	9.75653	-155.821	-17.7365	120.348
3336.22	8.80847	-159.793	-21.9944	115.804
3336.33	7.79601	-163.87	-26.4428	110.984
3336.45	6.72655	-167.659	-30.6618	106.335
3336.56	5.60792	-170.688	-34.1193	102.45
3336.68	4.4483	-172.481	-36.2533	99.9741
3336.79	3.25617	-172.643	-36.591	99.4614
3336.91	2.04025	-170.955	-34.8739	101.207
3337.02	0.809421	-167.431	-31.1467	105.138
3337.14	-0.427301	-162.356	-25.7766	110.803
3337.25	-1.66088	-156.259	-19.3888	117.481
3337.37	-2.88229	-149.831	-12.7366	124.357
3337.48	-4.08259	-143.791	-6.54589	130.7
3337.6	-5.25302	-138.739	-1.3785	135.982
3337.71	-6.38501	-135.036	2.44813	139.932
3337.83	-7.47029	-132.768	4.87315	142.514
3337.94	-8.5009	-131.782	6.04534	143.872
3338.06	-9.46933	-131.777	6.24219	144.262
3338.17	-10.3685	-132.41	5.78401	143.978
3338.29	-11.1918	-133.369	4.9659	143.3
3338.4	-11.9332	-134.419	4.01805	142.455
3338.52	-12.5874	-135.412	3.09381	141.599
3338.64	-13.1494	-136.271	2.27728	140.826
3338.75	-13.6153	-136.974	1.60054	140.175
3338.87	-13.9816	-137.527	1.0625	139.652
3338.98	-14.2456	-137.953	0.64448	139.242
3339.1	-14.4054	-138.281	0.320928	138.923
3339.21	-14.4598	-138.538	0.065628	138.67
3339.33	-14.4084	-138.751	-0.145567	138.46
3339.44	-14.2517	-138.94	-0.33423	138.272
3339.56	-13.9907	-139.126	-0.520144	138.086
3339.67	-13.6274	-139.329	-0.722816	137.883
3339.79	-13.1643	-139.569	-0.963406	137.642
3339.9	-12.605	-139.871	-1.26699	137.337
3340.02	-11.9535	-140.268	-1.66506	136.937
3340.13	-11.2145	-140.797	-2.19822	136.401
3340.25	-10.3935	-141.512	-2.91862	135.674
3340.36	-9.4965	-142.473	-3.8914	134.691
3340.48	-8.52999	-143.756	-5.19381	133.369
3340.59	-7.50108	-145.438	-6.90982	131.618
3340.71	-6.41729	-147.588	-9.11792	129.352
3340.82	-5.28654	-150.244	-11.8699	126.504
3340.94	-4.11711	-153.387	-15.1609	123.065
3341.05	-2.91755	-156.907	-18.8943	119.118
3341.17	-1.69663	-160.582	-22.852	114.878
3341.29	-0.463278	-164.078	-26.6834	110.712
3341.4	0.77348	-166.98	-29.9291	107.122
3341.52	2.0046	-168.851	-32.0872	104.677
3341.63	3.22109	-169.314	-32.7147	103.884
3341.75	4.41403	-168.133	-31.54	105.053
3341.86	5.57472	-165.286	-28.5506	108.184
3341.98	6.69466	-160.986	-24.0221	112.942
3342.09	7.76566	-155.678	-18.475	118.728
3342.21	8.77989	-149.963	-12.5667	124.829
3342.32	9.72992	-144.484	-6.95496	130.574
3342.44	10.6088	-139.796	-2.17108	135.454
3342.55	11.4102	-136.259	1.4616	139.182
3342.67	12.1281	-133.988	3.84928	141.687
3342.78	12.7573	-132.885	5.09405	143.073
3342.9	13.2932	-132.702	5.42582	143.554
3343.01	13.732	-133.141	5.12545	143.392
3343.13	14.0703	-133.919	4.46082	142.841
3343.24	14.3058	-134.817	3.64699	142.111
3343.36	14.4367	-135.689	2.8317	141.353
3343.47	14.462	-136.458	2.09955	140.657
3343.59	14.3815	-137.093	1.48624	140.065
3343.7	14.1959	-137.596	0.995342	139.587
3343.82	13.9065	-137.986	0.612669	139.211
3343.94	13.5155	-138.286	0.316547	138.919
3344.05	13.0256	-138.521	0.0839232	138.689
3344.17	12.4404	-138.713	-0.106749	138.499
3344.28	11.7643	-138.881	-0.27477	138.332
3344.4	11.0022	-139.044	-0.437727	138.169
3344.51	10.1596	-139.219	-0.612731	137.994
3344.63	9.24279	-139.424	-0.818064	137.788
3344.74	8.25837	-139.681	-1.07512	137.53
3344.86	7.21358	-140.015	-1.41062	137.193
3344.97	6.11605	-140.46	-1.85889	136.743
3345.09	4.97381	-141.061	-2.46421	136.133
3345.2	3.79522	-141.872	-3.28225	135.307
3345.32	2.58889	-142.955	-4.37979	134.196
3345.43	1.36365	-144.382	-5.83083	132.72
3345.55	0.128464	-146.216	-7.70701	130.802
3345.66	-1.10764	-148.5	-10.0603	128.38
3345.78	-2.33563	-151.23	-12.8979	125.434
3345.89	-3.54652	-154.325	-16.1511	122.023
3346.01	-4.73144	-157.609	-19.6477	118.313
3346.12	-5.88174	-160.801	-23.0977	114.606
3346.24	-6.98901	-163.54	-26.1088	111.323
3346.36	-8.04514	-165.431	-28.2373	108.957
3346.47	-9.04241	-166.119	-29.0741	107.97
3346.59	-9.97353	-165.362	-28.3444	108.673
3346.7	-10.8317	-163.103	-25.9918	111.12
3346.82	-11.6106	-159.5	-22.2146	115.071
3346.93	-12.3046	-154.918	-17.4391	120.04
3347.05	-12.9086	-149.875	-12.2326	125.409
3347.16	-13.4181	-144.943	-7.18495	130.573
3347.28	-13.8295	-140.631	-2.79214	135.046
3347.39	-14.1398	-137.288	0.624005	138.536
3347.51	-14.3466	-135.056	2.94456	140.945
3347.62	-14.4484	-133.875	4.23147	142.338
3347.74	-14.4446	-133.549	4.67134	142.892
3347.85	-14.3351	-133.821	4.50758	142.837
3347.97	-14.1208	-134.439	3.98099	142.401
3348.08	-13.8031	-135.197	3.2907	141.779
3348.2	-13.3845	-135.957	2.57758	141.113
3348.31	-12.868	-136.64	1.92553	140.491
3348.43	-12.2573	-137.211	1.37294	139.957
3348.54	-11.557	-137.667	0.927346	139.522
3348.66	-10.7722	-138.022	0.578607	139.179
3348.77	-9.90852	-138.295	0.30863	138.912
3348.89	-8.97238	-138.508	0.0973226	138.703
3349.01	-7.9706	-138.681	-0.0744239	138.532
3349.12	-6.9105	-138.831	-0.223809	138.383
3349.24	-5.79985	-138.973	-0.366425	138.24
3349.35	-4.64675	-139.124	-0.517257	138.09
3349.47	-3.45966	-139.299	-0.692074	137.915
3349.58	-2.24723	-139.515	-0.909093	137.697
3349.7	-1.01836	-139.796	-1.19088	137.414
3349.81	0.217989	-140.17	-1.56638	137.037
3349.93	1.45276	-140.673	-2.07298	136.527
3350.04	2.67693	-141.353	-2.75799	135.837
3350.16	3.88154	-142.264	-3.67878	134.906
3350.27	5.05779	-143.468	-4.90002	133.668
3350.39	6.19707	-145.024	-6.4863	132.052
3350.5	7.29105	-146.977	-8.48818	130
3350.62	8.33172	-149.331	-10.921	127.489
3350.73	9.31149	-152.033	-13.7386	124.556
3350.85	10.2232	-154.943	-16.8067	121.329
3350.96	11.0601	-157.829	-19.8884	118.052
3351.08	11.8162	-160.38	-22.6516	115.076
3351.19	12.4859	-162.243	-24.7082	112.827
3351.31	13.0643	-163.089	-25.6856	111.718
3351.43	13.5471	-162.679	-25.3137	112.051
3351.54	13.9309	-160.927	-23.5038	113.92
3351.66	14.2129	-157.942	-20.39	117.163
3351.77	14.3909	-154.021	-16.3152	121.391
3351.89	14.4637	-149.605	-11.7635	126.078
3352	14.4307	-145.199	-7.25816	130.683
3352.12	14.2923	-141.266	-3.25666	134.753
3352.23	14.0493	-138.14	-0.0731134	137.994
3352.35	13.7036	-135.977	2.15558	140.288
3352.46	13.2577	-134.754	3.45753	141.669
3352.58	12.7148	-134.318	3.98053	142.279
3352.69	12.079	-134.449	3.93286	142.315
3352.81	11.3549	-134.925	3.52891	141.983
3352.92	10.5477	-135.558	2.95134	141.46
3353.04	9.66346	-136.214	2.33318	140.88
3353.15	8.70854	-136.816	1.75657	140.329
3353.27	7.68995	-137.326	1.26168	139.849
3353.38	6.61514	-137.737	0.859323	139.456
3353.5	5.49198	-138.058	0.542975	139.144
3353.61	4.32867	-138.306	0.297808	138.902
3353.73	3.13372	-138.499	0.106483	138.712
3353.84	1.91588	-138.654	-0.0478412	138.559
3353.96	0.684044	-138.787	-0.180422	138.427
3354.08	-0.552772	-138.912	-0.305046	138.302
3354.19	-1.78552	-139.042	-0.434811	138.172
3354.31	-3.0052	-139.19	-0.583298	138.024
3354.42	-4.20287	-139.373	-0.765981	137.841
3354.54	-5.36979	-139.608	-1.00186	137.604
3354.65	-6.49741	-139.92	-1.31524	137.289
3354.77	-7.57749	-140.34	-1.73755	136.865
3354.88	-8.60214	-140.908	-2.30878	136.29
3355	-9.56385	-141.67	-3.07788	135.514
3355.11	-10.4556	-142.681	-4.10096	134.479
3355.23	-11.2709	-143.994	-5.43557	133.123
3355.34	-12.0037	-145.653	-7.12965	131.394
3355.46	-12.6487	-147.672	-9.20401	129.264
3355.57	-13.2011	-150.013	-11.6296	126.754
3355.69	-13.6571	-152.571	-14.3039	123.963
3355.8	-14.0131	-155.155	-17.0353	121.085
3355.92	-14.2666	-157.502	-19.5455	118.411
3356.03	-14.4157	-159.301	-21.4984	116.304
3356.15	-14.4594	-160.249	-22.5589	115.131
3356.26	-14.3973	-160.114	-22.4678	115.179
3356.38	-14.23	-158.794	-21.1142	116.565
3356.49	-13.9585	-156.352	-18.5797	119.193
3356.61	-13.5849	-153.027	-15.1348	122.757
3356.73	-13.1119	-149.191	-11.1875	126.816
3356.84	-12.5431	-145.284	-7.19706	130.89
3356.96	-11.8824	-141.726	-3.5807	134.564
3357.07	-11.1349	-138.831	-0.639748	137.551
3357.19	-10.3059	-136.762	1.47728	139.717
3357.3	-9.40151	-135.527	2.77069	141.069
3357.42	-8.42834	-135.009	3.35395	141.717
3357.53	-7.39351	-135.024	3.40288	141.83
3357.65	-6.30458	-135.377	3.10644	141.59
3357.76	-5.16953	-135.896	2.63067	141.158
3357.88	-3.99665	-136.458	2.09999	140.658
3357.99	-2.79452	-136.984	1.59385	140.172
3358.11	-1.57193	-137.438	1.15336	139.744
3358.22	-0.33782	-137.806	0.792008	139.39
3358.34	0.898779	-138.096	0.506399	139.109
3358.45	2.12883	-138.32	0.284672	138.89
3358.57	3.34332	-138.494	0.11202	138.718
3358.68	4.53339	-138.633	-0.0262946	138.581
3358.8	5.69033	-138.751	-0.143743	138.463
3358.91	6.80567	-138.86	-0.252478	138.355
3359.03	7.87126	-138.971	-0.363927	138.243
3359.15	8.8793	-139.097	-0.489764	138.117
3359.26	9.82243	-139.25	-0.643106	137.964
3359.38	10.6937	-139.446	-0.839907	137.767
3359.49	11.4869	-139.706	-1.10049	137.505
3359.61	12.196	-140.055	-1.45116	137.153
3359.72	12.816	-140.527	-1.92553	136.676
3359.84	13.3422	-141.162	-2.56515	136.032
3359.95	13.7709	-142.007	-3.41828	135.17
3360.07	14.0989	-143.109	-4.53572	134.038
3360.18	14.3239	-144.511	-5.96198	132.587
3360.3	14.4441	-146.23	-7.72099	130.788
3360.41	14.4586	-148.246	-9.7968	128.652
3360.53	14.3675	-150.477	-12.1127	126.251
3360.64	14.1713	-152.771	-14.5156	123.739
3360.76	13.8714	-154.905	-16.7744	121.356
3360.87	13.4702	-156.61	-18.6012	119.408
3360.99	12.9705	-157.613	-19.6978	118.217
3361.1	12.3759	-157.692	-19.8205	118.051
3361.22	11.6908	-156.732	-18.8449	119.042
3361.33	10.9203	-154.763	-16.8106	121.142
3361.45	10.0699	-151.97	-13.9262	124.117
3361.56	9.14586	-148.664	-10.531	127.602
3361.68	8.15498	-145.227	-7.02378	131.179
3361.8	7.10448	-142.033	-3.78091	134.471
3361.91	6.00204	-139.376	-1.08702	137.201
3362.03	4.85573	-137.422	0.903299	139.228
3362.14	3.67393	-136.2	2.16812	140.536
3362.26	2.46528	-135.625	2.79107	141.207
3362.37	1.23862	-135.546	2.91839	141.383
3362.49	0.00292151	-135.793	2.71486	141.223
3362.6	-1.23277	-136.212	2.33004	140.872
3362.72	-2.45943	-136.688	1.8792	140.446
3362.83	-3.66809	-137.145	1.43836	140.022
3362.95	-4.84989	-137.545	1.04879	139.643
3363.06	-5.99621	-137.874	0.726054	139.326
3363.18	-7.09865	-138.134	0.469448	139.073
3363.29	-8.14915	-138.336	0.269762	138.875
3363.41	-9.14003	-138.492	0.114504	138.721
3363.52	-10.0641	-138.616	-0.00912737	138.598
3363.64	-10.9145	-138.72	-0.112968	138.494
3363.75	-11.685	-138.815	-0.207691	138.4
3363.87	-12.3701	-138.911	-0.303249	138.304
3363.98	-12.9647	-139.017	-0.409659	138.198
3364.1	-13.4644	-139.145	-0.53802	138.069
3364.22	-13.8657	-139.309	-0.701687	137.905
3364.33	-14.1655	-139.524	-0.917594	137.689
3364.45	-14.3617	-139.813	-1.20765	137.398
3364.56	-14.4529	-140.204	-1.59998	137.004
3364.68	-14.4383	-140.73	-2.1296	136.471
3364.79	-14.3181	-141.432	-2.83779	135.757
3364.91	-14.0932	-142.353	-3.76891	134.815
3365.02	-13.7652	-143.531	-4.96361	133.604
3365.14	-13.3365	-144.986	-6.44716	132.092
3365.25	-12.8103	-146.71	-8.21336	130.283
3365.37	-12.1903	-148.641	-10.2062	128.229
3365.48	-11.4812	-150.66	-12.3048	126.05
3365.6	-10.6881	-152.581	-14.3192	123.942
3365.71	-9.81675	-154.172	-16.0051	122.162
3365.83	-8.87363	-155.191	-17.1005	120.99
3365.94	-7.86559	-155.43	-17.3799	120.67
3366.06	-6.80001	-154.766	-16.7124	121.341
3366.17	-5.68467	-153.204	-15.1052	122.993
3366.29	-4.52774	-150.881	-12.7143	125.452
3366.4	-3.33767	-148.055	-9.81819	128.419
3366.52	-2.12317	-145.054	-6.75959	131.535
3366.63	-0.893126	-142.209	-3.87407	134.461
3366.75	0.343473	-139.792	-1.42681	136.938
3366.87	1.57758	-137.966	0.426209	138.818
3366.98	2.80017	-136.778	1.64591	140.069
3367.1	4.00231	-136.169	2.29043	140.749
3367.21	5.17519	-136.016	2.47935	140.975
3367.33	6.31025	-136.174	2.35486	140.883
3367.44	7.39917	-136.505	2.05037	140.606
3367.56	8.43401	-136.903	1.67173	140.247
3367.67	9.40719	-137.297	1.29089	139.879
3367.79	10.3116	-137.648	0.94864	139.545
3367.9	11.1406	-137.939	0.66203	139.263
3368.02	11.8881	-138.172	0.432631	139.037
3368.13	12.5488	-138.352	0.253573	138.859
3368.25	13.1176	-138.492	0.114462	138.721
3368.36	13.5906	-138.603	0.0042661	138.612
3368.48	13.9642	-138.695	-0.0873536	138.52
3368.59	14.2357	-138.777	-0.16974	138.438
3368.71	14.4031	-138.859	-0.251539	138.356
3368.82	14.4652	-138.949	-0.341334	138.266
3368.94	14.4215	-139.056	-0.448496	138.159
3369.05	14.2723	-139.191	-0.584176	138.023
3369.17	14.0188	-139.369	-0.762431	137.844
3369.28	13.6628	-139.608	-1.00143	137.605
3369.4	13.2069	-139.93	-1.32459	137.28
3369.52	12.6545	-140.364	-1.76126	136.841
3369.63	12.0095	-140.945	-2.34649	136.252
3369.75	11.2767	-141.71	-3.11868	135.473
3369.86	10.4614	-142.694	-4.11438	134.466
3369.98	9.56967	-143.92	-5.35894	133.202
3370.09	8.60796	-145.384	-6.85311	131.677
3370.21	7.58332	-147.044	-8.55722	129.93
3370.32	6.50324	-148.806	-10.3771	128.051
3370.44	5.37562	-150.518	-12.1584	126.201
3370.55	4.20871	-151.983	-13.6956	124.592
3370.67	3.01104	-152.987	-14.7609	123.465
3370.78	1.79137	-153.338	-15.1491	123.04
3370.9	0.558615	-152.915	-14.7282	123.458
3371.01	-0.678201	-151.697	-13.4811	124.734
3371.13	-1.91004	-149.786	-11.5204	126.745
3371.24	-3.12788	-147.391	-9.07115	129.249
3371.36	-4.32283	-144.791	-6.42451	131.942
3371.47	-5.48614	-142.277	-3.87663	134.524
3371.59	-6.60931	-140.096	-1.67136	136.753
3371.7	-7.68412	-138.407	0.0378429	138.483
3371.82	-8.70272	-137.268	1.19928	139.667
3371.94	-9.65765	-136.644	1.8497	140.343
3372.05	-10.5419	-136.435	2.08504	140.606
3372.17	-11.3491	-136.519	2.02657	140.572
3372.28	-12.0732	-136.774	1.79221	140.358
3372.4	-12.709	-137.103	1.47824	140.06
3372.51	-13.2519	-137.44	1.15207	139.744
3372.63	-13.6978	-137.745	0.853458	139.452
3372.74	-14.0435	-138.002	0.600422	139.203
3372.86	-14.2865	-138.209	0.396392	139.001
3372.97	-14.425	-138.37	0.236545	138.843
3373.09	-14.458	-138.495	0.112368	138.719
3373.2	-14.3852	-138.593	0.0144395	138.622
3373.32	-14.2071	-138.674	-0.0662219	138.541
3373.43	-13.9252	-138.745	-0.137761	138.47
3373.55	-13.5414	-138.815	-0.20767	138.4
3373.66	-13.0585	-138.891	-0.283293	138.324
3373.78	-12.4802	-138.98	-0.372526	138.235
3373.89	-11.8105	-139.092	-0.484655	138.123
3374.01	-11.0544	-139.239	-0.631309	137.976
3374.12	-10.2175	-139.434	-0.827496	137.779
3374.24	-9.30581	-139.699	-1.09261	137.513
3374.35	-8.32605	-140.056	-1.45112	137.153
3374.47	-7.28538	-140.534	-1.93257	136.669
3374.59	-6.19141	-141.167	-2.56995	136.027
3374.7	-5.05213	-141.985	-3.39568	135.193
3374.82	-3.87589	-143.01	-4.43426	134.141
3374.93	-2.67128	-144.246	-5.69117	132.863
3375.05	-1.44711	-145.663	-7.13946	131.384
3375.16	-0.212336	-147.189	-8.70688	129.775
3375.28	1.02401	-148.7	-10.2691	128.162
3375.39	2.25289	-150.032	-11.6553	126.722
3375.51	3.46531	-150.998	-12.6692	125.659
3375.62	4.65241	-151.424	-13.1267	125.171
3375.74	5.80551	-151.19	-12.8992	125.391
3375.85	6.91617	-150.261	-11.9521	126.356
3375.97	7.97627	-148.707	-10.3624	127.982
3376.08	8.97805	-146.695	-8.30916	130.077
3376.2	9.9142	-144.46	-6.03698	132.386
3376.31	10.7779	-142.255	-3.80442	134.646
3376.43	11.5627	-140.303	-1.83294	136.637
3376.54	12.263	-138.756	-0.270443	138.215
3376.66	12.8737	-137.679	0.822773	139.325
3376.77	13.3902	-137.055	1.46589	139.987
3376.89	13.8088	-136.806	1.73413	140.275
3377.01	14.1265	-136.83	1.72967	140.289
3377.12	14.3408	-137.019	1.55574	140.131
3377.24	14.4503	-137.288	1.29912	139.886
3377.35	14.4542	-137.573	1.02234	139.617
3377.47	14.3523	-137.837	0.763674	139.364
3377.58	14.1455	-138.062	0.541626	139.145
3377.7	13.8353	-138.244	0.361113	138.967
3377.81	13.4239	-138.388	0.219068	138.826
3377.93	12.9144	-138.499	0.108652	138.716
3378.04	12.3104	-138.586	0.0218947	138.629
3378.16	11.6164	-138.657	-0.048956	138.559
3378.27	10.8375	-138.719	-0.110971	138.497
3378.39	9.97935	-138.778	-0.170624	138.437
3378.5	9.04823	-138.842	-0.234188	138.374
3378.62	8.05097	-138.916	-0.308305	138.299
3378.73	6.99484	-139.008	-0.400691	138.207
3378.85	5.88758	-139.128	-0.520931	138.087
3378.96	4.73728	-139.289	-0.681372	137.926
3379.08	3.55236	-139.505	-0.897995	137.709
3379.19	2.34147	-139.797	-1.1911	137.414
3379.31	1.11349	-140.189	-1.58543	137.018
3379.42	-0.122621	-140.71	-2.10908	136.492
3379.54	-1.35781	-141.386	-2.7905	135.805
3379.66	-2.58305	-142.239	-3.65266	134.933
3379.77	-3.78938	-143.276	-4.70412	133.867
3379.89	-4.96797	-144.478	-5.92758	132.622
3380	-6.11021	-145.789	-7.26853	131.252
3380.12	-7.20775	-147.112	-8.62803	129.856
3380.23	-8.25254	-148.308	-9.86513	128.578
3380.35	-9.23697	-149.219	-10.8129	127.593
3380.46	-10.1538	-149.688	-11.3079	127.072
3380.58	-10.9964	-149.599	-11.2282	127.143
3380.69	-11.7585	-148.909	-10.5275	127.854
3380.81	-12.4346	-147.661	-9.25444	129.152
3380.92	-13.0198	-145.987	-7.54882	130.889
3381.04	-13.5097	-144.081	-5.61364	132.853
3381.15	-13.9008	-142.162	-3.67231	134.817
3381.27	-14.1902	-140.428	-1.92361	136.581
3381.38	-14.3758	-139.024	-0.507511	138.009
3381.5	-14.4562	-138.018	0.510471	139.039
3381.61	-14.4309	-137.407	1.13544	139.678
3381.73	-14.3001	-137.132	1.42475	139.981
3381.84	-14.0646	-137.107	1.46338	140.034
3381.96	-13.7263	-137.241	1.34079	139.923
3382.07	-13.2875	-137.457	1.1345	139.726
3382.19	-12.7516	-137.696	0.90199	139.5
3382.31	-12.1224	-137.922	0.679598	139.282
3382.42	-11.4045	-138.119	0.485958	139.091
3382.54	-10.6031	-138.279	0.327113	138.933
3382.65	-9.72424	-138.405	0.20148	138.808
3382.77	-8.77421	-138.504	0.103694	138.711
3382.88	-7.75999	-138.581	0.0270822	138.635
3383	-6.689	-138.643	-0.0350001	138.573
3383.11	-5.56906	-138.696	-0.0886633	138.519
3383.23	-4.40838	-138.747	-0.139486	138.468
3383.34	-3.21543	-138.801	-0.192815	138.415
3383.46	-1.99895	-138.862	-0.254228	138.354
3383.57	-0.767827	-138.938	-0.33012	138.278
3383.69	0.468931	-139.036	-0.428371	138.179
3383.8	1.70228	-139.167	-0.559093	138.048
3383.92	2.9232	-139.342	-0.735398	137.872
3384.03	4.12277	-139.58	-0.974031	137.632
3384.15	5.2922	-139.901	-1.29558	137.31
3384.26	6.42295	-140.327	-1.72382	136.879
3384.38	7.50675	-140.883	-2.28341	136.316
3384.49	8.53566	-141.589	-2.99545	135.598
3384.61	9.50218	-142.454	-3.87019	134.713
3384.73	10.3992	-143.466	-4.89761	133.671
3384.84	11.2202	-144.585	-6.03732	132.51
3384.96	11.9592	-145.733	-7.21145	131.31
3385.07	12.6107	-146.797	-8.30494	130.187
3385.19	13.1701	-147.64	-9.17702	129.286
3385.3	13.6331	-148.127	-9.68474	128.757
3385.42	13.9964	-148.148	-9.71458	128.719
3385.53	14.2574	-147.652	-9.21332	129.225
3385.65	14.4142	-146.663	-8.20756	130.248
3385.76	14.4655	-145.283	-6.80405	131.675
3385.88	14.4111	-143.67	-5.16921	133.332
3385.99	14.2513	-142.013	-3.49401	135.025
3386.11	13.9873	-140.486	-1.95489	136.576
3386.22	13.6211	-139.223	-0.68221	137.858
3386.34	13.1552	-138.293	0.256169	138.806
3386.45	12.5931	-137.705	0.854381	139.413
3386.57	11.939	-137.415	1.15462	139.724
3386.68	11.1976	-137.353	1.22656	139.806
3386.8	10.3743	-137.441	1.14692	139.735
3386.91	9.47515	-137.611	0.98434	139.579
3387.03	8.50673	-137.809	0.791122	139.391
3387.14	7.47612	-138.002	0.60143	139.205
3387.26	6.39085	-138.172	0.433654	139.039
3387.38	5.25886	-138.312	0.29465	138.901
3387.49	4.08843	-138.423	0.184071	138.791
3387.61	2.88813	-138.51	0.0978275	138.705
3387.72	1.66672	-138.577	0.0304033	138.638
3387.84	0.433145	-138.632	-0.0238567	138.584
3387.95	-0.803578	-138.678	-0.0702067	138.538
3388.07	-2.0344	-138.721	-0.113439	138.494
3388.18	-3.25033	-138.766	-0.1581	138.45
3388.3	-4.44246	-138.817	-0.208868	138.399
3388.41	-5.60209	-138.879	-0.271032	138.337
3388.53	-6.72072	-138.959	-0.351046	138.257
3388.64	-7.79018	-139.065	-0.457165	138.15
3388.76	-8.80265	-139.207	-0.600096	138.007
3388.87	-9.75071	-139.4	-0.793577	137.813
3388.99	-10.6275	-139.661	-1.05465	137.551
3389.1	-11.4264	-140.008	-1.40325	137.201
3389.22	-12.1418	-140.463	-1.86059	136.742
3389.33	-12.7684	-141.044	-2.44564	136.153
3389.45	-13.3016	-141.761	-3.16943	135.422
3389.56	-13.7375	-142.608	-4.02719	134.554
3389.68	-14.0729	-143.557	-4.98966	133.577
3389.8	-14.3054	-144.545	-5.99629	132.552
3389.91	-14.4332	-145.481	-6.9541	131.573
3390.03	-14.4554	-146.251	-7.74553	130.76
3390.14	-14.3719	-146.736	-8.24693	130.242
3390.26	-14.1833	-146.835	-8.35466	130.126
3390.37	-13.8909	-146.495	-8.01231	130.47
3390.49	-13.4969	-145.724	-7.22965	131.264
3390.6	-13.0042	-144.597	-6.08612	132.424
3390.72	-12.4163	-143.244	-4.71638	133.811
3390.83	-11.7377	-141.823	-3.28193	135.259
3390.95	-10.9731	-140.489	-1.93763	136.614
3391.06	-10.1283	-139.362	-0.803178	137.755
3391.18	-9.20941	-138.511	0.0535604	138.618
3391.29	-8.22314	-137.953	0.618495	139.19
3391.41	-7.1767	-137.658	0.921164	139.5
3391.52	-6.07776	-137.569	1.01776	139.604
3391.64	-4.93435	-137.619	0.973437	139.566
3391.75	-3.75483	-137.75	0.848359	139.446
3391.87	-2.54783	-137.912	0.689714	139.291
3391.98	-1.32218	-138.075	0.529264	139.134
3392.1	-0.0868358	-138.221	0.384872	138.991
3392.21	1.14916	-138.343	0.263926	138.871
3392.33	2.37678	-138.44	0.16708	138.774
3392.45	3.58704	-138.516	0.0913417	138.699
3392.56	4.77108	-138.576	0.0322117	138.64
3392.68	5.92025	-138.623	-0.0150839	138.593
3392.79	7.02614	-138.663	-0.0550391	138.553
3392.91	8.08067	-138.7	-0.0917556	138.516
3393.02	9.07613	-138.737	-0.129093	138.479
3393.14	10.0052	-138.779	-0.170968	138.437
3393.25	10.8612	-138.83	-0.221742	138.386
3393.37	11.6377	-138.895	-0.286692	138.321
3393.48	12.3291	-138.98	-0.372527	138.235
3393.6	12.9304	-139.096	-0.487953	138.12
3393.71	13.4372	-139.251	-0.644183	137.963
3393.83	13.8457	-139.462	-0.855239	137.752
3393.94	14.153	-139.744	-1.13774	137.468
3394.06	14.3567	-140.114	-1.50971	137.095
3394.17	14.4555	-140.589	-1.98801	136.613
3394.29	14.4486	-141.181	-2.58369	136.013
3394.4	14.3361	-141.886	-3.29569	135.294
3394.52	14.1187	-142.684	-4.10338	134.477
3394.63	13.7981	-143.527	-4.9603	133.607
3394.75	13.3766	-144.344	-5.79203	132.76
3394.86	12.8573	-145.038	-6.5014	132.035
3394.98	12.244	-145.506	-6.98258	131.541
3395.1	11.5412	-145.658	-7.14253	131.373
3395.21	10.7539	-145.441	-6.92447	131.592
3395.33	9.88808	-144.849	-6.32581	132.198
3395.44	8.94993	-143.939	-5.40381	133.131
3395.56	7.94635	-142.813	-4.26586	134.282
3395.67	6.88468	-141.605	-3.04703	135.511
3395.79	5.77268	-140.448	-1.88184	136.684
3395.9	4.61848	-139.451	-0.878674	137.693
3396.02	3.43052	-138.68	-0.103617	138.473
3396.13	2.2175	-138.158	0.4234	139.005
3396.25	0.988274	-137.865	0.721536	139.308
3396.36	-0.248154	-137.756	0.835318	139.427
3396.48	-1.48275	-137.777	0.819421	139.416
3396.59	-2.70647	-137.874	0.726128	139.326
3396.71	-3.91039	-138.006	0.597611	139.201
3396.82	-5.08568	-138.142	0.463103	139.068
3396.94	-6.22376	-138.267	0.339702	138.946
3397.05	-7.3163	-138.372	0.235089	138.842
3397.17	-8.35532	-138.457	0.150704	138.758
3397.28	-9.33321	-138.523	0.0844833	138.692
3397.4	-10.2428	-138.575	0.0328166	138.641
3397.52	-11.0775	-138.616	-0.00829187	138.6
3397.63	-11.8311	-138.651	-0.0426635	138.565
3397.75	-12.4982	-138.682	-0.0737963	138.534
3397.86	-13.0739	-138.713	-0.104959	138.503
3397.98	-13.5539	-138.747	-0.139422	138.469
3398.09	-13.9348	-138.789	-0.180781	138.427
3398.21	-14.2138	-138.841	-0.233333	138.375
3398.32	-14.3888	-138.91	-0.302513	138.305
3398.44	-14.4585	-139.003	-0.39537	138.212
3398.55	-14.4225	-139.129	-0.52101	138.087
3398.67	-14.281	-139.298	-0.690903	137.916
3398.78	-14.035	-139.525	-0.918802	137.688
3398.9	-13.6863	-139.825	-1.21993	137.386
3399.01	-13.2375	-140.213	-1.60899	136.995
3399.13	-12.6919	-140.697	-2.09665	136.504
3399.24	-12.0535	-141.28	-2.68431	135.912
3399.36	-11.3269	-141.947	-3.35794	135.231
3399.47	-10.5174	-142.663	-4.08238	134.498
3399.59	-9.631	-143.368	-4.79869	133.771
3399.7	-8.67413	-143.985	-5.42732	133.131
3399.82	-7.65381	-144.427	-5.87866	132.67
3399.93	-6.57748	-144.613	-6.07041	132.472
3400.05	-5.45304	-144.489	-5.94752	132.594
3400.17	-4.28869	-144.045	-5.49874	133.047
3400.28	-3.09295	-143.317	-4.76359	133.79
3400.4	-1.87458	-142.389	-3.82637	134.737
3400.51	-0.64247	-141.37	-2.79883	135.772
3400.63	0.594355	-140.374	-1.79655	136.781
3400.74	1.82685	-139.498	-0.916445	137.665
3400.86	3.04601	-138.807	-0.221442	138.364
3400.97	4.24292	-138.324	0.264686	138.853
3401.09	5.40881	-138.039	0.55277	139.145
3401.2	6.53517	-137.919	0.677355	139.273
3401.32	7.61375	-137.916	0.683791	139.283
3401.43	8.63667	-137.985	0.617071	139.219
3401.55	9.59645	-138.09	0.514548	139.119
3401.66	10.4861	-138.203	0.402863	139.009
3401.78	11.299	-138.309	0.298173	138.905
3401.89	12.0294	-138.399	0.208238	138.815
3402.01	12.6717	-138.472	0.135095	138.743
3402.12	13.2215	-138.53	0.0774592	138.685
3402.24	13.6745	-138.575	0.0324848	138.64
3402.35	14.0276	-138.611	-0.00313956	138.605
3402.47	14.2781	-138.641	-0.0326437	138.575
3402.59	14.4242	-138.667	-0.0589982	138.549
3402.7	14.4648	-138.693	-0.0849635	138.523
3402.82	14.3997	-138.721	-0.113269	138.495
3402.93	14.2292	-138.755	-0.146869	138.461
3403.05	13.9548	-138.797	-0.189255	138.419
3403.16	13.5783	-138.853	-0.244816	138.363
3403.28	13.1025	-138.927	-0.319232	138.289
3403.39	12.5309	-139.028	-0.419866	138.188
3403.51	11.8677	-139.164	-0.556046	138.051
3403.62	11.1177	-139.346	-0.739081	137.868
3403.74	10.2864	-139.588	-0.98171	137.625
3403.85	9.37992	-139.902	-1.29663	137.309
3403.97	8.40486	-140.297	-1.69376	136.91
3404.08	7.36835	-140.776	-2.17608	136.424
3404.2	6.27797	-141.33	-2.7345	135.861
3404.31	5.1417	-141.932	-3.34282	135.247
3404.43	3.96785	-142.537	-3.95486	134.627
3404.54	2.765	-143.08	-4.50611	134.068
3404.66	1.54195	-143.488	-4.92151	133.645
3404.77	0.307642	-143.691	-5.12919	133.432
3404.89	-0.928895	-143.637	-5.07734	133.483
3405	-2.15862	-143.312	-4.74903	133.814
3405.12	-3.37253	-142.738	-4.16984	134.398
3405.24	-4.56176	-141.98	-3.40485	135.17
3405.35	-5.71761	-141.126	-2.54541	136.036
3405.47	-6.83162	-140.276	-1.68978	136.896
3405.58	-7.89565	-139.513	-0.923628	137.665
3405.7	-8.90191	-138.897	-0.30571	138.286
3405.81	-9.84305	-138.456	0.138007	138.732
3405.93	-10.7122	-138.185	0.411834	139.008
3406.04	-11.5029	-138.057	0.541896	139.141
3406.16	-12.2096	-138.036	0.565335	139.167
3406.27	-12.8269	-138.083	0.520496	139.124
3406.39	-13.3504	-138.165	0.440165	139.045
3406.5	-13.7762	-138.258	0.34839	138.955
3406.62	-14.1012	-138.347	0.260254	138.867
3406.73	-14.3231	-138.424	0.183425	138.791
3406.85	-14.4403	-138.487	0.12037	138.728
3406.96	-14.4518	-138.537	0.0704402	138.678
3407.08	-14.3576	-138.576	0.031445	138.639
3407.19	-14.1583	-138.607	0.000669221	138.609
3407.31	-13.8555	-138.633	-0.0245985	138.583
3407.42	-13.4514	-138.655	-0.0468699	138.561
3407.54	-12.9488	-138.676	-0.0684698	138.54
3407.65	-12.3515	-138.7	-0.0916707	138.516
3407.77	-11.6639	-138.727	-0.118897	138.489
3407.89	-10.891	-138.761	-0.152978	138.455
3408	-10.0384	-138.805	-0.197446	138.41
3408.12	-9.11232	-138.865	-0.256861	138.351
3408.23	-8.1196	-138.945	-0.337143	138.271
3408.35	-7.06749	-139.054	-0.445843	138.162
3408.46	-5.96366	-139.2	-0.592199	138.015
3408.58	-4.8162	-139.394	-0.786788	137.82
3408.69	-3.6335	-139.647	-1.04045	137.566
3408.81	-2.4242	-139.967	-1.36218	137.243
3408.92	-1.19715	-140.359	-1.75587	136.847
3409.04	0.0386713	-140.816	-2.21603	136.384
3409.15	1.27423	-141.319	-2.72348	135.872
3409.27	2.5005	-141.833	-3.24244	135.348
3409.38	3.70849	-142.306	-3.72112	134.864
3409.5	4.88939	-142.677	-4.09725	134.482
3409.61	6.03454	-142.884	-4.3089	134.267
3409.73	7.13559	-142.882	-4.3084	134.266
3409.84	8.18447	-142.651	-4.0755	134.5
3409.96	9.17352	-142.204	-3.62513	134.954
3410.07	10.0955	-141.59	-3.00651	135.577
3410.19	10.9437	-140.882	-2.29341	136.295
3410.31	11.7118	-140.16	-1.56853	137.023
3410.42	12.3943	-139.501	-0.90668	137.688
3410.54	12.9862	-138.958	-0.361838	138.235
3410.65	13.4832	-138.559	0.0391706	138.637
3410.77	13.8815	-138.304	0.295704	138.895
3410.88	14.1784	-138.175	0.426897	139.028
3411	14.3715	-138.141	0.462754	139.066
3411.11	14.4596	-138.169	0.435624	139.04
3411.23	14.442	-138.232	0.374027	138.98
3411.34	14.3188	-138.307	0.299468	138.906
3411.46	14.0908	-138.381	0.225868	138.833
3411.57	13.7599	-138.447	0.160664	138.768
3411.69	13.3283	-138.501	0.10661	138.714
3411.8	12.7993	-138.544	0.0635634	138.671
3411.92	12.1767	-138.578	0.02989	138.638
3412.03	11.465	-138.605	0.00338961	138.611
3412.15	10.6695	-138.626	-0.0181976	138.59
3412.26	9.79606	-138.645	-0.0369848	138.571
[truncated: 28,001 more rows]

## Sheet: iSHELL_GP+planet_model_unphased
times	Planet model	GP lower 1-sig	GP median	GP upper 1-sig
7684.76	14.0731	47.1064	50.9154	54.7243
7684.79	14.1573	46.4445	50.5472	54.6499
7684.83	14.2313	44.7979	49.8089	54.8198
7684.87	14.2952	42.581	48.716	54.8511
7684.9	14.3488	40.0328	47.2907	54.5486
7684.94	14.3921	37.2686	45.5604	53.8522
7684.97	14.4252	34.3403	43.5575	52.7748
7685.01	14.4479	31.2608	41.3182	51.3756
7685.05	14.4603	28.0133	38.8814	49.7495
7685.08	14.4623	24.5592	36.2877	48.0162
7685.12	14.454	20.8495	33.5784	46.3073
7685.15	14.4354	16.8404	30.7944	44.7485
7685.19	14.4064	12.5091	27.9753	43.4415
7685.23	14.3671	7.86313	25.1585	42.4538
7685.26	14.3175	2.93982	22.3783	41.8168
7685.3	14.2577	-2.20142	19.6659	41.5332
7685.33	14.1877	-7.48879	17.0483	41.5854
7685.37	14.1075	-12.8465	14.5484	41.9433
7685.41	14.0172	-18.2006	12.1849	42.5703
7685.44	13.9169	-23.4827	9.97205	43.4268
7685.48	13.8067	-28.6319	7.92025	44.4724
7685.51	13.6865	-33.596	6.03585	45.6677
7685.55	13.5566	-38.3318	4.32171	46.9752
7685.59	13.417	-42.805	2.77756	48.3601
7685.62	13.2678	-46.9902	1.40041	49.791
7685.66	13.109	-50.87	0.18502	51.24
7685.7	12.9409	-54.4346	-0.87568	52.6832
7685.73	12.7636	-57.6808	-1.79014	54.1005
7685.77	12.5771	-60.6114	-2.56781	55.4758
7685.8	12.3816	-63.2342	-3.21874	56.7967
7685.84	12.1772	-65.5608	-3.75333	58.0541
7685.88	11.9641	-67.6063	-4.182	59.2423
7685.91	11.7425	-69.3879	-4.51501	60.3579
7685.95	11.5124	-70.9246	-4.76227	61.4001
7685.98	11.2742	-72.2364	-4.93324	62.3699
7686.02	11.0278	-73.3434	-5.0368	63.2697
7686.06	10.7736	-74.2657	-5.08127	64.1031
7686.09	10.5116	-75.0229	-5.07429	64.8744
7686.13	10.2422	-75.6339	-5.02292	65.588
7686.16	9.96539	-76.1162	-4.93356	66.249
7686.2	9.68146	-76.4863	-4.81205	66.8621
7686.24	9.39061	-76.7593	-4.66369	67.4319
7686.27	9.09304	-76.9491	-4.49323	67.9626
7686.31	8.78896	-77.068	-4.30499	68.4581
7686.34	8.47859	-77.1274	-4.10283	68.9217
7686.38	8.16215	-77.137	-3.89025	69.3565
7686.42	7.83987	-77.1058	-3.67036	69.7651
7686.45	7.51199	-77.0413	-3.44597	70.1494
7686.49	7.17872	-76.9505	-3.2196	70.5113
7686.52	6.84032	-76.8391	-2.99349	70.8521
7686.56	6.49703	-76.7123	-2.76964	71.173
7686.6	6.14909	-76.5746	-2.54984	71.4749
7686.63	5.79674	-76.4297	-2.33566	71.7584
7686.67	5.44025	-76.2811	-2.1285	72.0241
7686.7	5.07987	-76.1315	-1.92958	72.2723
7686.74	4.71585	-75.9834	-1.73997	72.5034
7686.78	4.34845	-75.8388	-1.56061	72.7176
7686.81	3.97795	-75.6996	-1.3923	72.915
7686.85	3.6046	-75.5672	-1.23573	73.0957
7686.88	3.22867	-75.4429	-1.0915	73.2599
7686.92	2.85042	-75.3278	-0.960106	73.4076
7686.96	2.47014	-75.2228	-0.841979	73.5388
7686.99	2.08809	-75.1285	-0.737467	73.6536
7687.03	1.70455	-75.0456	-0.64686	73.7519
7687.06	1.31979	-74.9746	-0.570391	73.8338
7687.1	0.934082	-74.9157	-0.508246	73.8992
7687.14	0.547707	-74.8691	-0.460565	73.948
7687.17	0.16094	-74.8351	-0.427454	73.9802
7687.21	-0.225942	-74.8136	-0.408982	73.9957
7687.24	-0.612662	-74.8046	-0.405195	73.9942
7687.28	-0.998944	-74.8079	-0.41611	73.9757
7687.32	-1.38451	-74.8232	-0.441728	73.9397
7687.35	-1.76909	-74.8502	-0.482034	73.8861
7687.39	-2.1524	-74.8883	-0.537002	73.8143
7687.42	-2.53417	-74.9369	-0.6066	73.7237
7687.46	-2.91412	-74.9953	-0.69079	73.6137
7687.5	-3.29199	-75.0625	-0.789532	73.4834
7687.53	-3.66751	-75.1374	-0.902786	73.3318
7687.57	-4.0404	-75.2185	-1.03051	73.1575
7687.6	-4.4104	-75.3044	-1.17264	72.9591
7687.64	-4.77724	-75.3929	-1.32913	72.7346
7687.68	-5.14067	-75.4818	-1.49987	72.482
7687.71	-5.50041	-75.5682	-1.68473	72.1987
7687.75	-5.85622	-75.6488	-1.8835	71.8818
7687.79	-6.20784	-75.7197	-2.09587	71.5279
7687.82	-6.55502	-75.7762	-2.32141	71.1333
7687.86	-6.89751	-75.8127	-2.55951	70.6937
7687.89	-7.23506	-75.823	-2.8093	70.2044
7687.93	-7.56743	-75.7995	-3.06963	69.6602
7687.97	-7.89439	-75.7336	-3.33899	69.0556
7688	-8.2157	-75.6157	-3.61542	68.3848
7688.04	-8.53112	-75.4344	-3.89641	67.6416
7688.07	-8.84045	-75.1775	-4.17886	66.8198
7688.11	-9.14345	-74.8311	-4.45894	65.9133
7688.15	-9.4399	-74.3801	-4.73201	64.9161
7688.18	-9.7296	-73.8081	-4.99257	63.8229
7688.22	-10.0123	-73.0976	-5.23413	62.6293
7688.25	-10.2879	-72.2303	-5.44918	61.3319
7688.29	-10.5561	-71.1872	-5.62915	59.9289
7688.33	-10.8168	-69.9494	-5.76436	58.4207
7688.36	-11.0697	-68.4981	-5.84409	56.8099
7688.4	-11.3147	-66.8153	-5.85658	55.1022
7688.43	-11.5516	-64.8848	-5.78913	53.3065
7688.47	-11.7802	-62.6924	-5.62829	51.4358
7688.51	-12.0004	-60.2272	-5.36001	49.5072
7688.54	-12.212	-57.4821	-4.96991	47.5423
7688.58	-12.4149	-54.4551	-4.44358	45.5679
7688.61	-12.6089	-51.1498	-3.76695	43.6159
7688.65	-12.7939	-47.5766	-2.92669	41.7232
7688.69	-12.9697	-43.7537	-1.91065	39.9324
7688.72	-13.1362	-39.7075	-0.708372	38.2907
7688.76	-13.2934	-35.4734	0.688436	36.8503
7688.79	-13.441	-31.0963	2.28538	35.667
7688.83	-13.579	-26.6293	4.08489	34.7991
7688.87	-13.7073	-22.1331	6.08575	34.3046
7688.9	-13.8258	-17.6719	8.28272	34.2373
7688.94	-13.9343	-13.308	10.6662	34.6403
7688.97	-14.0329	-9.09359	13.2219	35.5374
7689.01	-14.1215	-5.06139	15.931	36.9233
7689.05	-14.2	-1.21736	18.7696	38.7567
7689.08	-14.2683	2.4604	21.7098	40.9592
7689.12	-14.3264	6.01503	24.7189	43.4227
7689.15	-14.3742	9.49858	27.7607	46.0228
7689.19	-14.4118	12.9589	30.7958	48.6328
7689.23	-14.439	16.4299	33.7825	51.135
7689.26	-14.4559	19.9259	36.6772	53.4285
7689.3	-14.4625	23.4405	39.4361	55.4317
7689.33	-14.4587	26.9473	42.0157	57.0842
7689.37	-14.4446	30.4022	44.3743	58.3464
7689.41	-14.4201	33.7456	46.4727	59.1998
7689.44	-14.3853	36.904	48.2754	59.6468
7689.48	-14.3402	39.7914	49.7517	59.7121
7689.51	-14.2849	42.3081	50.8765	59.4449
7689.55	-14.2193	44.3389	51.6309	58.9229
7689.59	-14.1436	45.7532	52.0028	58.2524
7689.62	-14.0577	46.4247	51.9874	57.5501
7689.66	-13.9618	46.2898	51.5868	56.8838
7689.69	-13.8559	45.4121	50.8107	56.2093
7689.73	-13.7401	43.9562	49.6753	55.3943
7689.77	-13.6144	42.0955	48.2032	54.3109
7689.8	-13.479	39.9539	46.4227	52.8914
7689.84	-13.334	37.5947	44.3667	51.1388
7689.87	-13.1794	35.0224	42.0721	49.1218
7689.91	-13.0154	32.1874	39.5784	46.9694
7689.95	-12.842	29.0005	36.9267	44.853
7689.98	-12.6595	25.3688	34.1589	42.949
7690.02	-12.4679	21.2417	31.3162	41.3907
7690.06	-12.2674	16.6338	28.4386	40.2435
7690.09	-12.0582	11.6126	25.5638	39.5151
7690.13	-11.8403	6.27142	22.7266	39.1817
7690.16	-11.6139	0.709427	19.958	39.2066
7690.2	-11.3792	-4.97845	17.2854	39.5493
7690.24	-11.1363	-10.7052	14.7318	40.1688
7690.27	-10.8855	-16.3927	12.316	41.0248
7690.31	-10.6269	-21.9727	10.0525	42.0777
7690.34	-10.3607	-27.3859	7.95159	43.289
7690.38	-10.0871	-32.5827	6.01977	44.6223
7690.42	-9.80629	-37.5229	4.26003	46.043
7690.45	-9.51844	-42.175	2.67219	47.5194
7690.49	-9.22378	-46.5163	1.25339	49.0231
7690.52	-8.92252	-50.5318	-0.00148393	50.5288
7690.56	-8.61488	-54.214	-1.09936	52.0153
7690.6	-8.30107	-57.5618	-2.04854	53.4647
7690.63	-7.98132	-60.5797	-2.85832	54.8631
7690.67	-7.65585	-63.2771	-3.5386	56.1999
7690.7	-7.32491	-65.6673	-4.09964	57.468
7690.74	-6.98873	-67.7663	-4.55173	58.6628
7690.78	-6.64755	-69.5927	-4.90502	59.7827
7690.81	-6.30161	-71.1664	-5.16933	60.8278
7690.85	-5.95116	-72.5082	-5.35406	61.8001
7690.88	-5.59645	-73.6391	-5.46808	62.7029
7690.92	-5.23774	-74.5798	-5.51969	63.5404
7690.96	-4.87528	-75.3505	-5.51658	64.3173
7690.99	-4.50933	-75.9704	-5.46588	65.0387
7691.03	-4.14015	-76.4578	-5.37411	65.7095
7691.06	-3.76801	-76.8293	-5.24726	66.3348
7691.1	-3.39317	-77.1006	-5.09077	66.9191
7691.14	-3.01591	-77.2858	-4.90963	67.4665
7691.17	-2.63649	-77.3976	-4.70835	67.9809
7691.21	-2.25518	-77.4474	-4.49105	68.4653
7691.24	-1.87225	-77.4456	-4.26146	68.9226
7691.28	-1.48799	-77.401	-4.02299	69.355
7691.32	-1.10266	-77.3218	-3.77868	69.7644
7691.35	-0.716546	-77.2148	-3.53134	70.1521
7691.39	-0.329917	-77.0863	-3.28348	70.5193
7691.42	0.056949	-76.9416	-3.03734	70.8669
7691.46	0.443774	-76.7854	-2.79497	71.1955
7691.5	0.830282	-76.6217	-2.55818	71.5054
7691.53	1.2162	-76.4541	-2.32859	71.7969
7691.57	1.60124	-76.2857	-2.10764	72.0704
7691.6	1.98514	-76.1189	-1.8966	72.3257
7691.64	2.36761	-75.9563	-1.69657	72.5631
7691.68	2.7484	-75.7995	-1.50853	72.7825
7691.71	3.12721	-75.6505	-1.33332	72.9838
7691.75	3.50379	-75.5105	-1.17166	73.1672
7691.78	3.87786	-75.3807	-1.02417	73.3324
7691.82	4.24916	-75.2623	-0.891374	73.4795
7691.86	4.61742	-75.1559	-0.773696	73.6085
7691.89	4.98237	-75.0622	-0.671491	73.7193
7691.93	5.34375	-74.9819	-0.585041	73.8118
7691.96	5.70132	-74.9151	-0.51456	73.886
7692	6.0548	-74.8623	-0.460201	73.9419
7692.04	6.40395	-74.8235	-0.422066	73.9794
7692.07	6.74852	-74.7987	-0.400203	73.9983
7692.11	7.08826	-74.7879	-0.394618	73.9986
7692.15	7.42293	-74.7907	-0.405277	73.9802
7692.18	7.75228	-74.807	-0.43211	73.9427
7692.22	8.07609	-74.8361	-0.475018	73.886
7692.25	8.39412	-74.8775	-0.533877	73.8097
7692.29	8.70614	-74.9304	-0.608541	73.7133
7692.33	9.01193	-74.9939	-0.698853	73.5962
7692.36	9.31127	-75.0669	-0.804639	73.4576
7692.4	9.60396	-75.148	-0.925718	73.2966
7692.43	9.88976	-75.2358	-1.0619	73.112
7692.47	10.1685	-75.3283	-1.21298	72.9023
7692.51	10.44	-75.4234	-1.37874	72.6659
7692.54	10.7039	-75.5184	-1.55893	72.4006
7692.58	10.9603	-75.6104	-1.75325	72.1039
7692.61	11.2087	-75.6956	-1.96135	71.7729
7692.65	11.4492	-75.77	-2.18278	71.4045
7692.69	11.6815	-75.8285	-2.41694	70.9946
7692.72	11.9054	-75.8653	-2.66307	70.5392
7692.76	12.1208	-75.8738	-2.92019	70.0334
7692.79	12.3275	-75.846	-3.187	69.472
7692.83	12.5254	-75.7732	-3.46186	68.8495
7692.87	12.7143	-75.6451	-3.74267	68.1597
7692.9	12.8942	-75.4502	-4.0268	67.3966
7692.94	13.0648	-75.1757	-4.311	66.5537
7692.97	13.226	-74.8073	-4.59132	65.6247
7693.01	13.3778	-74.3295	-4.86298	64.6036
7693.05	13.52	-73.7256	-5.12033	63.4849
7693.08	13.6526	-72.9775	-5.35672	62.2641
7693.12	13.7754	-72.0666	-5.56451	60.9376
7693.15	13.8883	-70.9735	-5.73493	59.5036
7693.19	13.9913	-69.6788	-5.85817	57.9624
7693.23	14.0842	-68.1633	-5.9233	56.3167
7693.26	14.1671	-66.4088	-5.91841	54.572
7693.3	14.2399	-64.3988	-5.83063	52.7375
7693.33	14.3024	-62.1188	-5.64635	50.8261
7693.37	14.3548	-59.5579	-5.35137	48.8552
7693.41	14.3968	-56.709	-4.93121	46.8466
7693.44	14.4286	-53.5701	-4.37136	44.8273
7693.48	14.45	-50.145	-3.65769	42.8296
7693.51	14.4611	-46.445	-2.77689	40.8912
7693.55	14.4618	-42.4888	-1.71685	39.0551
7693.59	14.4522	-38.3044	-0.467218	37.37
7693.62	14.4323	-33.9296	0.980102	35.8898
7693.66	14.402	-29.4123	2.63047	34.6733
7693.69	14.3614	-24.811	4.48597	33.7829
7693.73	14.3106	-20.1932	6.545	33.2832
7693.77	14.2495	-15.6328	8.80183	33.2364
7693.8	14.1782	-11.2033	11.2463	33.6959
7693.84	14.0967	-6.96844	13.8635	34.6955
7693.87	14.0052	-2.96914	16.6339	36.237
7693.91	13.9037	0.78678	19.5331	38.2795
7693.95	13.7922	4.32694	22.5322	40.7374
7693.98	13.6708	7.70534	25.5978	43.4903
7694.02	13.5397	10.9856	28.6931	46.4005
7694.05	13.3988	14.2245	31.7779	49.3312
7694.09	13.2484	17.46	34.8096	52.1592
7694.13	13.0885	20.7069	37.7443	54.7817
7694.16	12.9192	23.9561	40.5375	57.1189
7694.2	12.7407	27.1771	43.1453	59.1136
7694.23	12.5531	30.3206	45.5256	60.7306
7694.27	12.3564	33.3228	47.6389	61.955
7694.31	12.151	36.1086	49.4496	62.7907
7694.34	11.9368	38.5964	50.9271	63.2578
7694.38	11.7141	40.7034	52.0462	63.389
7694.42	11.483	42.3536	52.7882	63.2228
7694.45	11.2438	43.4889	53.1414	62.794
7694.49	10.9964	44.0811	53.1013	62.1215
7694.52	10.7412	44.1425	52.6705	61.1986
7694.56	10.4783	43.7258	51.8592	59.9925
7694.6	10.2079	42.9137	50.684	58.4543
7694.63	9.93021	41.8	49.1682	56.5364
7694.67	9.6454	40.4702	47.3406	54.211
7694.7	9.3537	38.9821	45.2347	51.4872
7694.74	9.0553	37.3387	42.8878	48.4368
7694.78	8.75042	35.4373	40.3399	45.2424
7694.81	8.43927	33.002	37.6327	42.2633
7694.85	8.12209	29.6735	34.8083	39.9431
7694.88	7.7991	25.3774	31.9084	38.4393
7694.92	7.47053	20.3509	28.9732	37.5956
7694.96	7.13661	14.8452	26.0408	37.2364
7694.99	6.79758	9.03677	23.146	37.2552
7695.03	6.45369	3.052	20.3202	37.5884
7695.06	6.10518	-3.00932	17.5909	38.1911
7695.1	5.75231	-9.06305	14.9812	39.0255
7695.14	5.39531	-15.0362	12.5101	40.0564
7695.17	5.03446	-20.8652	10.1922	41.2497
7695.21	4.67	-26.4957	8.03805	42.5718
7695.24	4.30221	-31.882	6.05421	43.9904
7695.28	3.93133	-36.9872	4.24386	45.475
7695.32	3.55764	-41.783	2.60704	46.997
7695.35	3.18141	-46.2489	1.14108	48.5311
7695.39	2.80289	-50.3725	-0.158904	50.0546
7695.42	2.42238	-54.148	-1.29962	51.5488
7695.46	2.04012	-57.5762	-2.28913	52.998
7695.5	1.65641	-60.6631	-3.1365	54.3901
7695.53	1.27152	-63.4194	-3.85142	55.7166
7695.57	0.885713	-65.8595	-4.44392	56.9716
7695.6	0.499273	-68.0005	-4.92411	58.1523
7695.64	0.112477	-69.8618	-5.30198	59.2579
7695.68	-0.2744	-71.4642	-5.58723	60.2898
7695.71	-0.661081	-72.829	-5.78916	61.2507
7695.75	-1.04729	-73.9779	-5.9166	62.1447
7695.78	-1.43275	-74.932	-5.97783	62.9763
7695.82	-1.81718	-75.7119	-5.98059	63.7507
7695.86	-2.20031	-76.3374	-5.93208	64.4732
7695.89	-2.58187	-76.8268	-5.83896	65.1489
7695.93	-2.96158	-77.1973	-5.70735	65.7826
7695.96	-3.33917	-77.4646	-5.54291	66.3788
7696	-3.71437	-77.6431	-5.35084	66.9414
7696.04	-4.08691	-77.7459	-5.13592	67.474
7696.07	-4.45653	-77.7845	-4.90254	67.9794
7696.11	-4.82296	-77.7694	-4.65472	68.46
7696.14	-5.18594	-77.7099	-4.39614	68.9177
7696.18	-5.54521	-77.6142	-4.1302	69.3538
7696.22	-5.90051	-77.4895	-3.85997	69.7696
7696.25	-6.25158	-77.3422	-3.58828	70.1656
7696.29	-6.59818	-77.1778	-3.31767	70.5425
7696.32	-6.94007	-77.0013	-3.05047	70.9004
7696.36	-7.27698	-76.817	-2.78877	71.2395
7696.4	-7.60869	-76.6287	-2.53445	71.5598
7696.43	-7.93495	-76.4395	-2.28918	71.8611
7696.47	-8.25554	-76.2524	-2.05446	72.1435
7696.51	-8.57021	-76.0698	-1.8316	72.4066
7696.54	-8.87876	-75.894	-1.62177	72.6504
7696.58	-9.18095	-75.7266	-1.42598	72.8746
7696.61	-9.47657	-75.5694	-1.24511	73.0792
7696.65	-9.76541	-75.4237	-1.07989	73.2639
7696.69	-10.0473	-75.2905	-0.930969	73.4286
7696.72	-10.3219	-75.171	-0.798865	73.5732
7696.76	-10.5892	-75.0657	-0.684005	73.6977
7696.79	-10.8489	-74.9753	-0.586722	73.8019
7696.83	-11.1008	-74.9003	-0.507265	73.8858
7696.87	-11.3448	-74.8409	-0.4458	73.9493
7696.9	-11.5807	-74.7972	-0.402419	73.9923
7696.94	-11.8083	-74.7692	-0.377146	74.0149
7696.97	-12.0274	-74.7568	-0.369937	74.0169
7697.01	-12.2379	-74.7597	-0.38069	73.9984
7697.05	-12.4397	-74.7775	-0.40925	73.959
7697.08	-12.6326	-74.8096	-0.455413	73.8988
7697.12	-12.8164	-74.8552	-0.518933	73.8173
7697.15	-12.9911	-74.9134	-0.599531	73.7143
7697.19	-13.1564	-74.9832	-0.696896	73.5894
7697.23	-13.3124	-75.0631	-0.810694	73.4418
7697.26	-13.4588	-75.1518	-0.940573	73.2707
7697.3	-13.5956	-75.2475	-1.08616	73.0752
7697.33	-13.7227	-75.3479	-1.24708	72.8538
7697.37	-13.8399	-75.4508	-1.42291	72.605
7697.41	-13.9472	-75.5533	-1.61322	72.3269
7697.44	-14.0446	-75.652	-1.81753	72.0169
7697.48	-14.1319	-75.7431	-2.0353	71.6725
7697.51	-14.2091	-75.8221	-2.2659	71.2903
7697.55	-14.2761	-75.8837	-2.50857	70.8666
7697.59	-14.3329	-75.9219	-2.76239	70.3971
7697.62	-14.3795	-75.9297	-3.0262	69.8773
7697.66	-14.4158	-75.8988	-3.29857	69.3017
7697.69	-14.4417	-75.8203	-3.5777	68.6649
7697.73	-14.4573	-75.6834	-3.86136	67.9607
7697.77	-14.4626	-75.4765	-4.14679	67.1829
7697.8	-14.4575	-75.1864	-4.43061	66.3252
7697.84	-14.4421	-74.7985	-4.70874	65.381
7697.87	-14.4163	-74.297	-4.97628	64.3445
7697.91	-14.3802	-73.6648	-5.22744	63.21
7697.95	-14.3339	-72.8838	-5.45545	61.9729
7697.98	-14.2773	-71.9348	-5.65253	60.6298
7698.02	-14.2104	-70.7985	-5.8098	59.1789
7698.05	-14.1334	-69.455	-5.91728	57.6204
7698.09	-14.0463	-67.8852	-5.96395	55.9574
7698.13	-13.9491	-66.0709	-5.93773	54.1954
7698.16	-13.8419	-63.9953	-5.82566	52.344
7698.2	-13.7249	-61.6443	-5.614	50.4163
7698.23	-13.598	-59.007	-5.28849	48.43
7698.27	-13.4614	-56.0766	-4.83455	46.4076
7698.31	-13.3151	-52.8518	-4.23764	44.3765
7698.34	-13.1594	-49.3372	-3.48366	42.3699
7698.38	-12.9942	-45.5449	-2.55931	40.4262
7698.41	-12.8197	-41.4951	-1.4526	38.5899
7698.45	-12.636	-37.2179	-0.153331	36.9113
7698.49	-12.4433	-32.7538	1.34639	35.4466
7698.52	-12.2417	-28.1546	3.05162	34.2578
7698.56	-12.0313	-23.484	4.96412	33.4122
7698.59	-11.8124	-18.8166	7.08185	32.9803
7698.63	-11.5849	-14.2346	9.39861	33.0318
7698.67	-11.3492	-9.82067	11.9037	33.6281
7698.7	-11.1054	-5.64572	14.5817	34.809
7698.74	-10.8536	-1.75295	17.4123	36.5775
7698.78	-10.594	1.85452	20.3705	38.8864
7698.81	-10.3269	5.21471	23.4266	41.6386
7698.85	-10.0523	8.39342	26.5469	44.7003
7698.88	-9.77062	11.4632	29.6935	47.9238
7698.92	-9.48191	14.4849	32.8257	51.1666
7698.96	-9.18641	17.4965	35.9005	54.3045
7698.99	-8.88433	20.5101	38.8732	57.2363
7699.03	-8.5759	23.5134	41.699	59.8846
7699.06	-8.26134	26.4725	44.3335	62.1945
7699.1	-7.94086	29.3372	46.7343	64.1314
7699.14	-7.6147	32.0453	48.8618	65.6783
7699.17	-7.28309	34.5279	50.6803	66.8327
7699.21	-6.94626	36.7159	52.159	67.6021
7699.24	-6.60447	38.5464	53.2731	67.9998
7699.28	-6.25795	39.9699	54.0039	68.0379
7699.32	-5.90696	40.9577	54.3401	67.7225
7699.35	-5.55173	41.5064	54.2772	67.0481
7699.39	-5.19254	41.64	53.8186	65.9973
7699.42	-4.82962	41.4065	52.9746	64.5427
7699.46	-4.46325	40.8719	51.7625	62.6531
7699.5	-4.09369	40.1111	50.2058	60.3006
7699.53	-3.7212	39.1996	48.334	57.4684
7699.57	-3.34604	38.2037	46.1808	54.1579
7699.6	-2.96849	37.1675	43.7841	50.4007
7699.64	-2.58882	36.0803	41.1842	46.2882
7699.68	-2.20729	34.7544	38.4232	42.092
7699.71	-1.82419	32.4315	35.5434	38.6554
7699.75	-1.43978	28.2503	32.587	36.9237
7699.78	-1.05434	22.8853	29.5942	36.3031
7699.82	-0.66814	16.9997	26.6034	36.2071
7699.86	-0.281466	10.8495	23.6497	36.4499
7699.89	0.10541	4.56668	20.7646	36.9625
7699.93	0.492211	-1.75434	17.9758	37.7059
7699.96	0.878659	-8.03508	15.3066	38.6482
7700	1.26448	-14.2072	12.7761	39.7594
7700.04	1.64939	-20.2108	10.3992	41.0092
7700.07	2.03313	-25.9945	8.18657	42.3676
7700.11	2.41541	-31.5151	6.14513	43.8053
7700.14	2.79596	-36.7378	4.27827	45.2943
7700.18	3.17451	-41.6361	2.58631	46.8087
7700.22	3.55079	-46.1915	1.06689	48.3252
7700.25	3.92453	-50.3926	-0.284583	49.8235
7700.29	4.29546	-54.2354	-1.47448	51.2865
7700.32	4.66332	-57.7216	-2.51054	52.7005
7700.36	5.02784	-60.8582	-3.40153	54.0552
7700.4	5.38876	-63.657	-4.15683	55.3433
7700.43	5.74582	-66.133	-4.78621	56.5606
7700.47	6.09878	-68.3042	-5.29953	57.7051
7700.5	6.44737	-70.1905	-5.70657	58.7774
7700.54	6.79134	-71.8132	-6.01686	59.7794
7700.58	7.13046	-73.194	-6.2396	60.7148
7700.61	7.46448	-74.355	-6.38352	61.588
7700.65	7.79315	-75.3177	-6.45692	62.4038
7700.68	8.11625	-76.1029	-6.46757	63.1678
7700.72	8.43353	-76.7305	-6.42274	63.885
7700.76	8.74479	-77.2192	-6.32924	64.5607
7700.79	9.04978	-77.5862	-6.19337	65.1994
7700.83	9.3483	-77.8474	-6.02102	65.8054
7700.86	9.64014	-78.0175	-5.81763	66.3822
7700.9	9.92507	-78.1095	-5.58829	66.9329
7700.94	10.2029	-78.1353	-5.33767	67.4599
7700.97	10.4734	-78.1055	-5.07015	67.9652
7701.01	10.7365	-78.0295	-4.78974	68.45
7701.05	10.9918	-77.9157	-4.50019	68.9153
7701.08	11.2393	-77.7716	-4.20491	69.3618
7701.12	11.4787	-77.6037	-3.90707	69.7896
7701.15	11.71	-77.4179	-3.60957	70.1988
7701.19	11.9328	-77.2194	-3.31504	70.5893
7701.23	12.1471	-77.0126	-3.02589	70.9608
7701.26	12.3528	-76.8016	-2.74428	71.313
7701.3	12.5495	-76.5899	-2.47218	71.6455
7701.33	12.7373	-76.3805	-2.21134	71.9578
7701.37	12.916	-76.1763	-1.9633	72.2497
7701.41	13.0855	-75.9795	-1.72946	72.5206
7701.44	13.2456	-75.7922	-1.511	72.7702
7701.48	13.3962	-75.6163	-1.30899	72.9983
7701.51	13.5372	-75.4531	-1.12431	73.2045
7701.55	13.6685	-75.3041	-0.957744	73.3886
7701.59	13.79	-75.1703	-0.809908	73.5505
7701.62	13.9017	-75.0526	-0.681316	73.6899
7701.66	14.0035	-74.9516	-0.572362	73.8068
7701.69	14.0952	-74.8678	-0.483329	73.9011
7701.73	14.1768	-74.8015	-0.414398	73.9727
7701.77	14.2483	-74.753	-0.365649	74.0217
7701.8	14.3096	-74.7221	-0.33707	74.0479
7701.84	14.3606	-74.7086	-0.328558	74.0515
7701.87	14.4014	-74.7123	-0.339928	74.0324
7701.91	14.4318	-74.7325	-0.370918	73.9906
7701.95	14.452	-74.7685	-0.421199	73.9261
7701.98	14.4618	-74.8195	-0.490376	73.8387
7702.02	14.4612	-74.8843	-0.578005	73.7283
7702.05	14.4503	-74.9617	-0.683592	73.5945
7702.09	14.4291	-75.0501	-0.80661	73.4369
7702.13	14.3975	-75.1479	-0.946497	73.2549
7702.16	14.3556	-75.2529	-1.10267	73.0476
7702.2	14.3035	-75.3629	-1.27452	72.8139
7702.23	14.2411	-75.4751	-1.46142	72.5523
7702.27	14.1685	-75.5865	-1.66271	72.2611
7702.31	14.0858	-75.6934	-1.87769	71.938
7702.34	13.993	-75.7917	-2.1056	71.5805
7702.38	13.8902	-75.8767	-2.34561	71.1855
7702.41	13.7775	-75.9428	-2.59675	70.7493
7702.45	13.6549	-75.9836	-2.85792	70.2677
7702.49	13.5225	-75.9919	-3.12779	69.7363
7702.52	13.3805	-75.9594	-3.40476	69.1498
7702.56	13.2289	-75.8765	-3.68688	68.5027
7702.59	13.0678	-75.7325	-3.97176	67.789
7702.63	12.8973	-75.5155	-4.25652	67.0024
7702.67	12.7177	-75.212	-4.53766	66.1367
7702.7	12.5289	-74.8073	-4.81096	65.1854
7702.74	12.3312	-74.2854	-5.07143	64.1425
7702.77	12.1246	-73.629	-5.31316	63.0027
7702.81	11.9094	-72.8199	-5.52929	61.7614
7702.85	11.6856	-71.839	-5.71192	60.4152
7702.88	11.4535	-70.6668	-5.85208	58.9626
7702.92	11.2132	-69.2836	-5.9397	57.4042
7702.95	10.9649	-67.6703	-5.96366	55.743
7702.99	10.7087	-65.8089	-5.91181	53.9852
7703.03	10.4448	-63.683	-5.77111	52.1408
7703.06	10.1735	-61.2789	-5.52777	50.2234
7703.1	9.89492	-58.5864	-5.16748	48.2514
7703.14	9.60924	-55.5994	-4.67565	46.2481
7703.17	9.31668	-52.3175	-4.03778	44.242
7703.21	9.01745	-48.7468	-3.23979	42.2672
7703.24	8.71178	-44.9008	-2.26848	40.3638
7703.28	8.39987	-40.8022	-1.11201	38.5782
7703.32	8.08195	-36.4835	0.239618	36.9628
7703.35	7.75824	-31.9889	1.79406	35.577
7703.39	7.42899	-27.3745	3.55606	34.4866
7703.42	7.09441	-22.7093	5.52702	33.7633
7703.46	6.75477	-18.0737	7.70448	33.4827
7703.5	6.41028	-13.5555	10.0818	33.7191
7703.53	6.06121	-9.24066	12.6476	34.5359
7703.57	5.70781	-5.19851	15.3861	35.9707
7703.6	5.35032	-1.46496	18.2763	38.0176
7703.64	4.989	1.96862	21.2926	40.6167
7703.68	4.62411	5.15188	24.4048	43.6578
7703.71	4.25591	8.15783	27.5783	46.9988
7703.75	3.88467	11.0605	30.7749	50.4893
7703.78	3.51064	13.9177	33.9532	53.9887
7703.82	3.13411	16.7631	37.0696	57.376
7703.86	2.75533	19.6042	40.079	60.5539
7703.89	2.37458	22.4253	42.9363	63.4473
7703.93	1.99213	25.1915	45.5967	66.002
7703.96	1.60826	27.8537	48.0176	68.1815
7704	1.22323	30.354	50.1592	69.9643
7704.04	0.837333	32.6313	51.9857	71.3402
7704.07	0.450834	34.6269	53.4665	72.3061
7704.11	0.0640121	36.2907	54.5766	72.8626
7704.14	-0.322855	37.5869	55.2978	73.0088
7704.18	-0.709492	38.4976	55.6187	72.7399
7704.22	-1.09562	39.0257	55.5354	72.0451
7704.25	-1.48097	39.1947	55.0513	70.908
7704.29	-1.86525	39.0452	54.1773	69.3093
7704.32	-2.2482	38.6305	52.9308	67.2311
7704.36	-2.62954	38.0104	51.3359	64.6615
7704.4	-3.009	37.2435	49.4223	61.601
7704.43	-3.38631	36.3791	47.2241	58.0691
7704.47	-3.76119	35.444	44.7795	54.115
7704.5	-4.13338	34.4148	42.1291	49.8434
7704.54	-4.50261	33.1478	39.3151	45.4825
7704.58	-4.86863	31.2167	36.3804	41.5441
7704.61	-5.23115	27.9225	33.367	38.8116
7704.65	-5.58994	23.1586	30.3157	37.4729
7704.68	-5.94472	17.5015	27.2649	37.0283
7704.72	-6.29525	11.3967	24.2498	37.1029
7704.76	-6.64128	5.07876	21.3022	37.5256
7704.79	-6.98255	-1.3123	18.45	38.2122
7704.83	-7.31882	-7.6768	15.7167	39.1102
7704.86	-7.64986	-13.9358	13.1217	40.1793
7704.9	-7.97543	-20.0242	10.6801	41.3844
7704.94	-8.29528	-25.8876	8.40293	42.6934
7704.97	-8.6092	-31.4814	6.29738	44.0762
7705.01	-8.91696	-36.7706	4.36723	45.505
7705.04	-9.21834	-41.7283	2.61316	46.9546
7705.08	-9.51313	-46.3364	1.03321	48.4029
7705.12	-9.8011	-50.5841	-0.376794	49.8305
7705.15	-10.0821	-54.4676	-1.62282	51.2219
7705.19	-10.3558	-57.9891	-2.7122	52.5647
7705.22	-10.6221	-61.1564	-3.6533	53.8498
7705.26	-10.8809	-63.9813	-4.45515	55.071
7705.3	-11.1318	-66.4796	-5.12715	56.2253
7705.33	-11.3748	-68.6694	-5.67889	57.3116
7705.37	-11.6097	-70.571	-6.11988	58.3313
7705.41	-11.8362	-72.206	-6.45948	59.287
7705.44	-12.0543	-73.5962	-6.70671	60.1828
7705.48	-12.2637	-74.7638	-6.87025	61.0233
7705.51	-12.4644	-75.7306	-6.95835	61.8139
7705.55	-12.6561	-76.5173	-6.97885	62.5596
7705.59	-12.8388	-77.1441	-6.93911	63.2658
7705.62	-13.0123	-77.6294	-6.84609	63.9373
7705.66	-13.1765	-77.9908	-6.70631	64.5782
7705.69	-13.3312	-78.2442	-6.52589	65.1924
7705.73	-13.4765	-78.4042	-6.3106	65.783
7705.77	-13.612	-78.484	-6.06581	66.3524
7705.8	-13.7379	-78.4955	-5.79659	66.9023
7705.84	-13.8539	-78.4495	-5.50766	67.4342
7705.87	-13.96	-78.3556	-5.20343	67.9487
7705.91	-14.0561	-78.2223	-4.88802	68.4462
7705.95	-14.1421	-78.0572	-4.56526	68.9267
7705.98	-14.2181	-77.8672	-4.2387	69.3898
7706.02	-14.2838	-77.6583	-3.9116	69.8351
7706.05	-14.3393	-77.4359	-3.58697	70.2619
7706.09	-14.3846	-77.2047	-3.26758	70.6696
7706.13	-14.4196	-76.9692	-2.95591	71.0574
7706.16	-14.4442	-76.733	-2.65424	71.4245
7706.2	-14.4585	-76.4995	-2.36462	71.7703
7706.23	-14.4625	-76.2717	-2.08886	72.094
7706.27	-14.4561	-76.0522	-1.82858	72.3951
7706.31	-14.4394	-75.8434	-1.58523	72.6729
7706.34	-14.4124	-75.6471	-1.36004	72.927
7706.38	-14.375	-75.4652	-1.15409	73.157
7706.41	-14.3273	-75.299	-0.968281	73.3625
7706.45	-14.2694	-75.15	-0.803374	73.5432
7706.49	-14.2013	-75.0189	-0.659972	73.699
7706.52	-14.123	-74.9067	-0.538537	73.8296
7706.56	-14.0347	-74.8138	-0.439393	73.9351
7706.59	-13.9362	-74.7407	-0.362732	74.0153
7706.63	-13.8278	-74.6875	-0.308619	74.0702
7706.67	-13.7095	-74.654	-0.276996	74.1
7706.7	-13.5814	-74.6402	-0.267686	74.1048
7706.74	-13.4436	-74.6454	-0.280403	74.0846
7706.77	-13.2962	-74.6691	-0.314758	74.0396
7706.81	-13.1392	-74.7104	-0.370267	73.9698
7706.85	-12.9728	-74.7682	-0.446359	73.8755
7706.88	-12.7972	-74.8412	-0.542388	73.7564
7706.92	-12.6124	-74.9279	-0.657645	73.6126
7706.95	-12.4185	-75.0266	-0.791367	73.4439
7706.99	-12.2158	-75.1353	-0.942749	73.2498
7707.03	-12.0044	-75.2515	-1.11095	73.0297
7707.06	-11.7843	-75.3729	-1.2951	72.7827
7707.1	-11.5558	-75.4962	-1.4943	72.5076
7707.13	-11.3191	-75.6182	-1.70763	72.203
7707.17	-11.0742	-75.735	-1.93414	71.8668
7707.21	-10.8215	-75.8422	-2.17282	71.4965
7707.24	-10.561	-75.9346	-2.42259	71.0895
7707.28	-10.2929	-76.0066	-2.68227	70.6421
7707.31	-10.0174	-76.0516	-2.95053	70.1505
7707.35	-9.73483	-76.0619	-3.22584	69.6102
7707.39	-9.44526	-76.0291	-3.50643	69.0162
7707.42	-9.14893	-75.9435	-3.79018	68.3631
7707.46	-8.84604	-75.7942	-4.07457	67.645
7707.5	-8.53683	-75.569	-4.35656	66.8559
7707.53	-8.22151	-75.2545	-4.63254	65.9894
7707.57	-7.90031	-74.8358	-4.89819	65.0394
7707.6	-7.57345	-74.2969	-5.14841	64.0001
7707.64	-7.24118	-73.6206	-5.37722	62.8662
7707.68	-6.90372	-72.7887	-5.57768	61.6333
7707.71	-6.56132	-71.7821	-5.74182	60.2985
7707.75	-6.21423	-70.5817	-5.86061	58.8605
7707.78	-5.86269	-69.168	-5.92393	57.3202
7707.82	-5.50695	-67.5224	-5.9206	55.6812
7707.86	-5.14728	-65.6273	-5.83845	53.9504
7707.89	-4.78392	-63.4669	-5.66442	52.1381
7707.93	-4.41713	-61.0285	-5.38471	50.2591
7707.96	-4.04719	-58.3026	-4.98502	48.3326
7708	-3.67435	-55.2846	-4.45081	46.383
7708.04	-3.29888	-51.9755	-3.76763	44.4402
7708.07	-2.92105	-48.3831	-2.92153	42.5401
7708.11	-2.54113	-44.5234	-1.89944	40.7245
7708.14	-2.15939	-40.4216	-0.689707	39.0422
7708.18	-1.7761	-36.1137	0.717447	37.5486
7708.22	-1.39155	-31.6475	2.32938	36.3063
7708.25	-1.006	-27.0835	4.15054	35.3845
7708.29	-0.619726	-22.4946	6.18191	34.8584
7708.32	-0.233011	-17.9642	8.42064	34.8055
7708.36	0.153871	-13.58	10.8596	35.2992
7708.4	0.540642	-9.42298	13.487	36.3969
7708.43	0.927027	-5.55168	16.2863	38.1243
7708.47	1.31275	-1.98754	19.2362	40.4599
7708.5	1.69753	1.29114	22.3104	43.3296
7708.54	2.0811	4.34061	25.4781	46.6156
7708.58	2.46318	7.23278	28.7043	50.1758
7708.61	2.84349	10.0353	31.9501	53.8648
7708.65	3.22177	12.7982	35.1737	57.5492
7708.68	3.59775	15.5478	38.3311	61.1143
7708.72	3.97115	18.2867	41.3768	64.4668
7708.76	4.34171	20.9965	44.2652	67.5338
7708.79	4.70916	23.6421	46.9514	70.2607
7708.83	5.07325	26.1767	49.3925	72.6084
7708.86	5.4337	28.5467	51.5487	74.5508
7708.9	5.79026	30.6972	53.3842	76.0711
7708.94	6.14269	32.5773	54.8682	77.1591
7708.97	6.49071	34.1447	55.9759	77.8072
7709.01	6.83409	35.3703	56.6893	78.0082
7709.04	7.17258	36.241	56.997	77.7531
7709.08	7.50594	36.7606	56.8955	77.0304
7709.12	7.83393	36.9493	56.3884	75.8275
7709.15	8.15631	36.8407	55.4867	74.1327
7709.19	8.47286	36.4777	54.2083	71.9389
7709.22	8.78334	35.9065	52.5775	69.2484
7709.26	9.08754	35.1701	50.624	66.0779
7709.3	9.38523	34.2992	48.3825	62.4657
7709.33	9.67621	33.2994	45.8911	58.4829
7709.37	9.96026	32.1285	43.1909	54.2532
7709.4	10.2372	30.6586	40.3241	49.9896
7709.44	10.5068	28.627	37.3338	46.0406
7709.48	10.7689	25.6671	34.2623	42.8574
7709.51	11.0233	21.5654	31.1504	40.7353
7709.55	11.2697	16.4774	28.0366	39.5959
7709.58	11.5082	10.7366	24.9566	39.1767
7709.62	11.7384	4.62843	21.9423	39.2562
7709.66	11.9601	-1.64879	19.0218	39.6923
7709.69	12.1734	-7.95667	16.2188	40.3943
7709.73	12.3779	-14.1929	13.5532	41.2992
7709.77	12.5736	-20.2782	11.0402	42.3587
7709.8	12.7602	-26.1497	8.69145	43.5326
7709.84	12.9378	-31.7578	6.51443	44.7867
7709.87	13.106	-37.064	4.5134	46.0908
7709.91	13.2649	-42.0398	2.68952	47.4188
7709.95	13.4143	-46.6655	1.04133	48.7482
7709.98	13.5541	-50.9299	-0.434846	50.0603
7710.02	13.6843	-54.8288	-1.74446	51.3399
7710.05	13.8046	-58.3643	-2.89437	52.5756
7710.09	13.915	-61.544	-3.89246	53.759
7710.13	14.0155	-64.3798	-4.74731	54.8852
7710.16	14.1059	-66.8874	-5.46794	55.9515
7710.2	14.1863	-69.0851	-6.06357	56.9579
7710.23	14.2565	-70.993	-6.54343	57.9062
7710.27	14.3165	-72.6328	-6.91664	58.7995
7710.31	14.3663	-74.0263	-7.19208	59.6422
7710.34	14.4057	-75.1956	-7.37832	60.439
7710.38	14.4349	-76.1624	-7.48361	61.1952
7710.41	14.4538	-76.9475	-7.51581	61.9159
7710.45	14.4623	-77.5707	-7.48242	62.6059
7710.49	14.4604	-78.0507	-7.39056	63.2696
7710.52	14.4482	-78.4047	-7.24701	63.9107
7710.56	14.4257	-78.6488	-7.05817	64.5324
7710.59	14.3928	-78.7974	-6.83012	65.1371
7710.63	14.3497	-78.8638	-6.56864	65.7265
7710.67	14.2962	-78.8599	-6.27916	66.3016
7710.7	14.2326	-78.7966	-5.96683	66.8629
7710.74	14.1587	-78.6835	-5.63649	67.4105
7710.77	14.0748	-78.5293	-5.29271	67.9439
7710.81	13.9807	-78.3418	-4.93975	68.4623
7710.85	13.8767	-78.1281	-4.58159	68.9649
7710.88	13.7627	-77.8944	-4.22191	69.4506
7710.92	13.6389	-77.6464	-3.86416	69.9181
7710.95	13.5053	-77.3891	-3.51146	70.3662
7710.99	13.362	-77.1271	-3.16669	70.7937
7711.03	13.2092	-76.8645	-2.83248	71.1995
7711.06	13.0469	-76.605	-2.5112	71.5826
7711.1	12.8753	-76.3517	-2.20498	71.9418
7711.13	12.6945	-76.1077	-1.91571	72.2763
7711.17	12.5046	-75.8755	-1.64508	72.5853
7711.21	12.3058	-75.6573	-1.39456	72.8682
7711.24	12.0981	-75.4552	-1.16542	73.1243
7711.28	11.8818	-75.2707	-0.958742	73.3533
7711.31	11.657	-75.1054	-0.77541	73.5546
7711.35	11.4239	-74.9603	-0.616141	73.728
7711.39	11.1825	-74.8364	-0.481473	73.8734
7711.42	10.9332	-74.7343	-0.371773	73.9907
7711.46	10.676	-74.6543	-0.287246	74.0798
7711.49	10.4113	-74.5967	-0.227932	74.1409
7711.53	10.139	-74.5614	-0.193717	74.174
7711.57	9.85951	-74.548	-0.184336	74.1793
7711.6	9.57296	-74.556	-0.199379	74.1572
7711.64	9.27956	-74.5846	-0.238304	74.108
7711.67	8.97951	-74.6327	-0.300441	74.0318
7711.71	8.67304	-74.6991	-0.385008	73.9291
7711.75	8.36037	-74.7822	-0.491123	73.8
7711.78	8.04171	-74.8803	-0.617818	73.6447
7711.82	7.7173	-74.9913	-0.76405	73.4632
7711.86	7.38736	-75.113	-0.928723	73.2555
7711.89	7.05214	-75.2427	-1.11069	73.0213
7711.93	6.71187	-75.3775	-1.30878	72.7599
7711.96	6.3668	-75.5141	-1.52179	72.4705
7712	6.01718	-75.6488	-1.74849	72.1518
7712.04	5.66324	-75.7774	-1.98761	71.8021
7712.07	5.30526	-75.8952	-2.23787	71.4194
7712.11	4.94348	-75.9969	-2.49791	71.0011
7712.14	4.57816	-76.0765	-2.76629	70.5439
7712.18	4.20957	-76.1271	-3.04144	70.0442
7712.22	3.83796	-76.141	-3.32163	69.4977
7712.25	3.46361	-76.1095	-3.60486	68.8998
7712.29	3.08678	-76.0228	-3.88885	68.2451
7712.32	2.70774	-75.8699	-4.17093	67.528
7712.36	2.32676	-75.6386	-4.44793	66.7427
7712.4	1.94412	-75.3154	-4.71612	65.8831
7712.43	1.56008	-74.8856	-4.9711	64.9433
7712.47	1.17493	-74.3331	-5.20769	63.9177
7712.5	0.788944	-73.6411	-5.41985	62.8014
7712.54	0.402389	-72.7914	-5.60059	61.5902
7712.58	0.0155467	-71.7656	-5.74191	60.2817
7712.61	-0.371307	-70.5446	-5.83476	58.8751
7712.65	-0.757895	-69.1097	-5.869	57.3717
7712.68	-1.14394	-67.4428	-5.83347	55.7759
7712.72	-1.52917	-65.5272	-5.71601	54.0951
7712.76	-1.9133	-63.348	-5.50358	52.3408
7712.79	-2.29606	-60.8935	-5.18244	50.5287
7712.83	-2.67718	-58.1558	-4.73836	48.6791
7712.86	-3.05639	-55.1317	-4.15689	46.8179
7712.9	-3.43341	-51.8241	-3.4237	44.9767
7712.94	-3.80797	-48.2431	-2.52499	43.1931
7712.97	-4.1798	-44.4072	-1.44789	41.5114
7713.01	-4.54865	-40.3446	-0.180954	39.9826
7713.04	-4.91423	-36.0944	1.28532	38.6651
7713.08	-5.27631	-31.7079	2.95799	37.6239
7713.12	-5.6346	-27.2481	4.84114	36.9304
7713.15	-5.98887	-22.7893	6.93539	36.6601
7713.19	-6.33885	-18.4132	9.23745	36.8881
7713.22	-6.68429	-14.2008	11.7397	37.6802
7713.26	-7.02495	-10.2212	14.4299	39.0811
7713.3	-7.36058	-6.51722	17.2911	41.0995
7713.33	-7.69095	-3.09528	20.3013	43.698
7713.37	-8.01581	0.0746606	23.4339	46.7931
7713.4	-8.33494	3.04831	26.6574	50.2664
7713.44	-8.6481	5.88995	29.9363	53.9826
7713.48	-8.95507	8.65674	33.2314	57.806
7713.51	-9.25564	11.3886	36.5004	61.6121
7713.55	-9.54958	14.1044	39.6988	65.2931
7713.58	-9.83669	16.8019	42.7809	68.7599
7713.62	-10.1168	19.4605	45.7008	71.941
7713.66	-10.3896	22.0456	48.4134	74.7811
7713.69	-10.655	24.5124	50.8756	77.2388
7713.73	-10.9128	26.8112	53.0475	79.2837
7713.76	-11.1627	28.892	54.8932	80.8943
7713.8	-11.4047	30.709	56.382	82.055
7713.84	-11.6385	32.2251	57.4892	82.7534
7713.87	-11.864	33.4149	58.1968	82.9786
7713.91	-12.081	34.2671	58.4936	82.7202
7713.94	-12.2893	34.7846	58.3762	81.9677
7713.98	-12.4889	34.9841	57.8483	80.7125
7714.02	-12.6795	34.8929	56.9212	78.9495
7714.05	-12.861	34.545	55.6129	76.6807
7714.09	-13.0334	33.9761	53.9478	73.9195
7714.13	-13.1964	33.2167	51.956	70.6952
7714.16	-13.35	32.2842	49.672	67.0599
7714.2	-13.494	31.1715	47.1344	63.0973
7714.23	-13.6283	29.8322	44.3841	58.9361
7714.27	-13.753	28.1603	41.4637	54.7671
7714.31	-13.8677	25.9786	38.4163	50.8539
7714.34	-13.9726	23.0672	35.2842	47.5012
7714.38	-14.0674	19.2701	32.1087	44.9472
7714.41	-14.1522	14.6075	28.9282	43.2489
7714.45	-14.2268	9.25916	25.7787	42.2983
7714.49	-14.2913	3.45349	22.6924	41.9313
7714.52	-14.3456	-2.60709	19.6975	42.0021
7714.56	-14.3895	-8.76388	16.8184	42.4006
7714.59	-14.4232	-14.8954	14.0749	43.0453
7714.63	-14.4466	-20.9079	11.4831	43.8741
7714.67	-14.4596	-26.7285	9.05484	44.8382
7714.7	-14.4623	-32.3007	6.79821	45.8971
7714.74	-14.4546	-37.5812	4.71802	47.0173
7714.77	-14.4366	-42.5385	2.81601	48.1705
7714.81	-14.4083	-47.1509	1.0913	49.3335
7714.85	-14.3696	-51.4055	-0.459164	50.4872
7714.88	-14.3207	-55.2972	-1.84025	51.6167
7714.92	-14.2615	-58.8273	-3.05824	52.7109
7714.95	-14.1921	-62.0031	-4.12045	53.7622
7714.99	-14.1125	-64.8359	-5.03496	54.766
7715.03	-14.0229	-67.3413	-5.81035	55.7206
7715.06	-13.9232	-69.5371	-6.45542	56.6263
7715.1	-13.8135	-71.4435	-6.9791	57.4853
7715.13	-13.694	-73.0815	-7.39022	58.301
7715.17	-13.5647	-74.473	-7.69751	59.078
7715.21	-13.4257	-75.6398	-7.90943	59.8209
7715.24	-13.277	-76.6032	-8.03422	60.5348
7715.28	-13.1189	-77.3839	-8.0798	61.2243
7715.31	-12.9513	-78.0016	-8.05381	61.894
7715.35	-12.7745	-78.4746	-7.96358	62.5474
7715.39	-12.5886	-78.8201	-7.81615	63.1878
7715.42	-12.3936	-79.0538	-7.61824	63.8173
7715.46	-12.1898	-79.1901	-7.37633	64.4374
7715.49	-11.9773	-79.2423	-7.09659	65.0491
7715.53	-11.7562	-79.2222	-6.78489	65.6524
7715.57	-11.5266	-79.1406	-6.44687	66.2469
7715.6	-11.2889	-79.0074	-6.08784	66.8317
7715.64	-11.043	-78.8312	-5.71286	67.4055
7715.67	-10.7893	-78.6201	-5.32666	67.9668
7715.71	-10.5278	-78.3812	-4.93372	68.5138
7715.75	-10.2588	-78.1212	-4.5382	69.0448
7715.78	-9.98243	-77.8458	-4.14399	69.5579
7715.82	-9.69894	-77.5606	-3.75466	70.0513
7715.85	-9.40851	-77.2703	-3.3735	70.5233
7715.89	-9.11134	-76.9793	-3.00355	70.9723
7715.93	-8.80766	-76.6918	-2.64752	71.3967
7715.96	-8.49767	-76.4112	-2.3079	71.7954
7716	-8.1816	-76.1408	-1.9869	72.167
7716.03	-7.85967	-75.8835	-1.68649	72.5105
7716.07	-7.53213	-75.6418	-1.40839	72.8251
7716.11	-7.19919	-75.4181	-1.15409	73.1099
7716.14	-6.8611	-75.2141	-0.924866	73.3644
7716.18	-6.5181	-75.0316	-0.721763	73.5881
7716.21	-6.17043	-74.8718	-0.545615	73.7806
7716.25	-5.81835	-74.7358	-0.397044	73.9417
7716.29	-5.46211	-74.6244	-0.276468	74.0714
7716.32	-5.10196	-74.5379	-0.184097	74.1697
7716.36	-4.73815	-74.4765	-0.119942	74.2366
7716.4	-4.37096	-74.4401	-0.0838202	74.2725
7716.43	-4.00064	-74.4284	-0.0753564	74.2777
7716.47	-3.62746	-74.4406	-0.0939951	74.2526
7716.5	-3.25168	-74.4758	-0.139008	74.1978
7716.54	-2.87357	-74.5327	-0.209509	74.1136
7716.58	-2.49341	-74.6097	-0.304462	74.0008
7716.61	-2.11146	-74.7052	-0.422706	73.8598
7716.65	-1.728	-74.8171	-0.562967	73.6912
7716.68	-1.3433	-74.9429	-0.723876	73.4952
7716.72	-0.957647	-75.0801	-0.903995	73.2721
7716.76	-0.571305	-75.2257	-1.10183	73.0221
7716.79	-0.184554	-75.3765	-1.31583	72.7448
7716.83	0.202329	-75.5287	-1.54445	72.4398
7716.86	0.589067	-75.6783	-1.78609	72.1062
7716.9	0.975384	-75.821	-2.03916	71.7426
7716.94	1.361	-75.9515	-2.30202	71.3475
7716.97	1.74565	-76.0644	-2.57301	70.9184
7717.01	2.12904	-76.1533	-2.85039	70.4525
7717.04	2.51092	-76.2113	-3.13234	69.9466
7717.08	2.89099	-76.2304	-3.41686	69.3967
7717.12	3.269	-76.2019	-3.70176	68.7983
7717.15	3.64467	-76.1157	-3.98457	68.1466
7717.19	4.01773	-75.961	-4.26247	67.4361
7717.22	4.38791	-75.7255	-4.53215	66.6612
7717.26	4.75496	-75.3959	-4.78979	65.8163
7717.3	5.1186	-74.9576	-5.0309	64.8958
7717.33	5.47858	-74.3949	-5.25027	63.8943
7717.37	5.83464	-73.691	-5.4418	62.8074
7717.4	6.18652	-72.8285	-5.59851	61.6315
7717.44	6.53398	-71.7893	-5.71241	60.3645
7717.48	6.87676	-70.555	-5.77444	59.0061
7717.51	7.21463	-69.1076	-5.77454	57.5585
7717.55	7.54732	-67.4298	-5.70157	56.0267
7717.58	7.87462	-65.506	-5.54345	54.4191
7717.62	8.19629	-63.3226	-5.28723	52.7482
7717.66	8.51208	-60.8692	-4.91926	51.0307
7717.69	8.82179	-58.1394	-4.42544	49.2885
7717.73	9.12518	-55.1318	-3.79148	47.5489
7717.76	9.42205	-51.8516	-3.0032	45.8451
7717.8	9.71217	-48.3109	-2.04701	44.2169
7717.84	9.99534	-44.5309	-0.910264	42.7103
7717.87	10.2714	-40.5423	0.418209	41.3787
7717.91	10.54	-36.3868	1.94762	40.2821
7717.94	10.8012	-32.1172	3.6847	39.4866
7717.98	11.0546	-27.7968	5.63316	39.0632
7718.02	11.3	-23.4977	7.79324	39.0842
7718.05	11.5375	-19.2948	10.1612	39.6172
7718.09	11.7666	-15.2583	12.729	40.7163
7718.12	11.9873	-11.4421	15.484	42.41
7718.16	12.1995	-7.87378	18.4086	44.6909
7718.2	12.4029	-4.54927	21.4805	47.5102
7718.23	12.5974	-1.43603	24.6724	50.7808
7718.27	12.783	1.51599	27.9526	54.3892
7718.3	12.9593	4.36053	31.2851	58.2096
7718.34	13.1265	7.14319	34.6302	62.1172
7718.38	13.2842	9.89402	37.9452	65.9964
7718.41	13.4324	12.6246	41.1855	69.7463
7718.45	13.571	15.3285	44.3049	73.2812
7718.49	13.6999	17.9834	47.2573	76.5311
7718.52	13.8189	20.5548	49.9974	79.44
7718.56	13.9281	23	52.4821	81.9642
7718.59	14.0274	25.272	54.6712	84.0704
7718.63	14.1166	27.3245	56.5289	85.7333
7718.67	14.1956	29.1156	58.0246	86.9335
7718.7	14.2646	30.6111	59.1333	87.6556
7718.74	14.3233	31.7879	59.8373	87.8866
7718.77	14.3718	32.635	60.1254	87.6157
7718.81	14.41	33.154	59.9942	86.8344
7718.85	14.4378	33.3579	59.4477	85.5375
7718.88	14.4554	33.2684	58.497	83.7257
7718.92	14.4626	32.9124	57.1604	81.4085
7718.95	14.4594	32.3169	55.4623	78.6078
7718.99	14.446	31.5033	53.4329	75.3624
7719.03	14.4221	30.4802	51.1067	71.7333
7719.06	14.388	29.2344	48.5224	67.8105
7719.1	14.3435	27.7214	45.721	63.7207
7719.13	14.2888	25.8562	42.7452	59.6342
7719.17	14.2239	23.5129	39.638	55.7632
7719.21	14.1488	20.5484	36.4422	52.3359
7719.24	14.0635	16.8579	33.1988	49.5397
7719.28	13.9682	12.4336	29.9468	47.4601
7719.31	13.8629	7.3756	26.7222	46.0688
7719.35	13.7477	1.84721	23.5575	45.2678
7719.39	13.6227	-3.97798	20.4814	44.9408
7719.42	13.4879	-9.94552	17.5185	44.9826
7719.46	13.3434	-15.9281	14.6894	45.3069
7719.49	13.1894	-21.8239	12.0104	45.8447
7719.53	13.026	-27.5526	9.494	46.5406
7719.57	12.8532	-33.0518	7.14898	47.3497
7719.6	12.6712	-38.2738	4.98077	48.2353
7719.64	12.4802	-43.1836	2.99179	49.1672
7719.67	12.2803	-47.7573	1.18188	50.1211
7719.71	12.0715	-51.9801	-0.451346	51.0774
7719.75	11.8541	-55.8456	-1.91206	52.0214
7719.78	11.6283	-59.3541	-3.20587	52.9424
7719.82	11.3941	-62.5119	-4.33948	53.833
7719.85	11.1517	-65.3301	-5.32041	54.6893
7719.89	10.9014	-67.8233	-6.15671	55.5099
7719.93	10.6433	-70.0091	-6.85675	56.2956
7719.96	10.3776	-71.907	-7.4291	57.0488
7720	10.1044	-73.5378	-7.88232	57.7732
7720.03	9.824	-74.9229	-8.22493	58.4731
7720.07	9.53658	-76.0838	-8.46533	59.1531
7720.11	9.24233	-77.0413	-8.61172	59.8179
7720.14	8.94147	-77.8158	-8.67211	60.4716
7720.18	8.63421	-78.4265	-8.65431	61.1179
7720.21	8.32077	-78.8916	-8.56587	61.7598
7720.25	8.00138	-79.2278	-8.41414	62.3995
7720.29	7.67626	-79.4506	-8.20623	63.0381
7720.32	7.34565	-79.5743	-7.94901	63.6763
7720.36	7.00979	-79.6119	-7.64911	64.3136
7720.39	6.6689	-79.5751	-7.31293	64.9493
7720.43	6.32325	-79.4748	-6.94658	65.5816
7720.47	5.97307	-79.3207	-6.55593	66.2088
7720.5	5.61862	-79.1216	-6.14657	66.8285
7720.54	5.26014	-78.8858	-5.72379	67.4382
7720.57	4.8979	-78.6206	-5.29259	68.0354
7720.61	4.53216	-78.3327	-4.85765	68.6174
7720.65	4.16318	-78.0284	-4.42336	69.1817
7720.68	3.79121	-77.7135	-3.99379	69.7259
7720.72	3.41653	-77.393	-3.5727	70.2476
7720.76	3.03941	-77.0718	-3.16355	70.7447
7720.79	2.66011	-76.7542	-2.76949	71.2153
7720.83	2.27891	-76.4444	-2.39336	71.6576
7720.86	1.89608	-76.1457	-2.03774	72.0703
7720.9	1.51189	-75.8616	-1.70491	72.4518
7720.94	1.12662	-75.5949	-1.39689	72.8011
7720.97	0.740547	-75.3482	-1.11542	73.1173
7721.01	0.35394	-75.1236	-0.861972	73.3996
7721.04	-0.0329188	-74.923	-0.637783	73.6474
7721.08	-0.419754	-74.748	-0.443819	73.8603
7721.12	-0.80629	-74.5997	-0.280795	74.0381
7721.15	-1.19225	-74.479	-0.149178	74.1806
7721.19	-1.57735	-74.3864	-0.0491841	74.288
7721.22	-1.96133	-74.3221	0.0192142	74.3605
7721.26	-2.3439	-74.2859	0.0562868	74.3985
7721.3	-2.7248	-74.2773	0.0625388	74.4024
7721.33	-3.10374	-74.2955	0.0387014	74.3729
7721.37	-3.48047	-74.3393	-0.0142791	74.3108
7721.4	-3.8547	-74.4073	-0.0952562	74.2168
7721.44	-4.22618	-74.4976	-0.2029	74.0918
7721.48	-4.59463	-74.6082	-0.33572	73.9367
7721.51	-4.95979	-74.7366	-0.492082	73.7524
7721.55	-5.3214	-74.8801	-0.670239	73.5396
7721.58	-5.67921	-75.0357	-0.86835	73.299
7721.62	-6.03295	-75.2001	-1.08451	73.0311
7721.66	-6.38238	-75.3696	-1.31676	72.7361
7721.69	-6.72723	-75.5401	-1.56312	72.4139
7721.73	-7.06728	-75.7074	-1.82161	72.0641
7721.76	-7.40226	-75.8664	-2.09021	71.686
7721.8	-7.73195	-76.0119	-2.36693	71.2781
7721.84	-8.05611	-76.1381	-2.64974	70.8386
7721.87	-8.3745	-76.2384	-2.93658	70.3652
7721.91	-8.6869	-76.3055	-3.22532	69.8549
7721.94	-8.99308	-76.3315	-3.51371	69.3041
7721.98	-9.29283	-76.3074	-3.79934	68.7088
7722.02	-9.58592	-76.2234	-4.07953	68.0644
7722.05	-9.87216	-76.0685	-4.35129	67.3659
7722.09	-10.1513	-75.8306	-4.61122	66.6082
7722.12	-10.4232	-75.4966	-4.8554	65.7858
7722.16	-10.6877	-75.0522	-5.07929	64.8937
7722.2	-10.9445	-74.4821	-5.27763	63.9269
7722.23	-11.1935	-73.77	-5.44435	62.8813
7722.27	-11.4344	-72.899	-5.57248	61.754
7722.3	-11.6672	-71.8516	-5.65408	60.5435
7722.34	-11.8916	-70.6104	-5.68016	59.2501
7722.38	-12.1076	-69.1582	-5.64075	57.8767
7722.41	-12.3148	-67.4789	-5.52481	56.4293
7722.45	-12.5132	-65.5579	-5.32038	54.9172
7722.48	-12.7027	-63.3831	-5.01466	53.3538
7722.52	-12.8831	-60.9456	-4.59415	51.7573
7722.56	-13.0543	-58.2405	-4.04493	50.1507
7722.59	-13.2162	-55.2686	-3.35289	48.5629
7722.63	-13.3685	-52.0368	-2.50411	47.0286
7722.66	-13.5113	-48.5595	-1.48522	45.5891
7722.7	-13.6445	-44.8597	-0.28385	44.292
7722.74	-13.7679	-40.9701	1.11087	43.1918
7722.77	-13.8814	-36.933	2.70783	42.3487
7722.81	-13.985	-32.8011	4.5134	41.8279
7722.85	-14.0786	-28.6353	6.53093	41.6972
7722.88	-14.1621	-24.5016	8.76023	42.0221
7722.92	-14.2355	-20.4658	11.1972	42.8601
7722.95	-14.2987	-16.5849	13.8333	44.2515
7722.99	-14.3516	-12.8989	16.6554	46.2097
7723.03	-14.3943	-9.42377	19.6456	48.715
7723.06	-14.4267	-6.14979	22.7811	51.7119
7723.1	-14.4488	-3.04636	26.0341	55.1146
7723.13	-14.4605	-0.0714028	29.3726	58.8166
7723.17	-14.4619	2.81784	32.7601	62.7023
7723.21	-14.4529	5.65601	36.1566	66.6571
7723.24	-14.4336	8.46409	39.5191	70.5741
7723.28	-14.404	11.2472	42.8026	74.3579
7723.31	-14.364	13.995	45.9608	77.9265
7723.35	-14.3138	16.6834	48.9472	81.2111
7723.39	-14.2533	19.278	51.7166	84.1553
7723.42	-14.1827	21.7374	54.2256	86.7138
7723.46	-14.1018	24.0169	56.434	88.8511
7723.49	-14.0109	26.0726	58.3058	90.539
7723.53	-13.91	27.8652	59.8104	91.7555
7723.57	-13.7991	29.3627	60.9229	92.4832
7723.6	-13.6784	30.5426	61.6255	92.7083
7723.64	-13.5478	31.3938	61.907	92.4202
7723.67	-13.4076	31.916	61.7641	91.6122
7723.71	-13.2577	32.1187	61.2006	90.2826
7723.75	-13.0984	32.0188	60.2279	88.4369
7723.78	-12.9297	31.6373	58.864	86.0908
7723.82	-12.7517	30.9943	57.1335	83.2728
7723.85	-12.5647	30.1046	55.0665	80.0284
7723.89	-12.3686	28.971	52.6976	76.4242
7723.93	-12.1637	27.5784	50.0653	72.5523
7723.96	-11.9501	25.8871	47.2109	68.5346
7724	-11.7279	23.8301	44.1768	64.5235
7724.03	-11.4973	21.3164	41.0064	60.6964
7724.07	-11.2585	18.2503	37.7424	57.2345
7724.11	-11.0117	14.5635	34.4261	54.2887
7724.14	-10.7569	10.2494	31.0967	51.944
7724.18	-10.4945	5.37363	27.7905	50.2073
7724.21	-10.2246	0.055434	24.5402	49.025
7724.25	-9.94731	-5.56372	21.3751	48.314
7724.29	-9.66294	-11.3455	18.3203	47.9861
7724.32	-9.37165	-17.1676	15.3967	47.9611
7724.36	-9.07365	-22.9275	12.6216	48.1707
7724.39	-8.76917	-28.5421	10.0079	48.5578
7724.43	-8.45841	-33.9454	7.56518	49.0757
7724.47	-8.14159	-39.0867	5.29967	49.6861
7724.5	-7.81895	-43.9286	3.21456	50.3577
7724.54	-7.49071	-48.4448	1.31046	51.0657
7724.57	-7.15712	-52.6191	-0.414185	51.7907
7724.61	-6.8184	-56.4435	-1.9628	52.5179
7724.65	-6.4748	-59.9175	-3.34025	53.237
7724.68	-6.12657	-63.0463	-4.55255	53.9412
7724.72	-5.77395	-65.8402	-5.60659	54.627
7724.75	-5.41721	-68.3132	-6.50985	55.2935
7724.79	-5.05658	-70.4823	-7.27024	55.9418
7724.83	-4.69234	-72.3664	-7.89593	56.5746
7724.86	-4.32474	-73.9858	-8.3952	57.1954
7724.9	-3.95405	-75.3613	-8.77637	57.8085
7724.93	-3.58052	-76.5137	-9.04775	58.4182
7724.97	-3.20444	-77.4636	-9.21754	59.0285
7725.01	-2.82606	-78.2307	-9.29386	59.643
7725.04	-2.44565	-78.8339	-9.2847	60.2645
7725.08	-2.0635	-79.2907	-9.19788	60.8949
7725.12	-1.67987	-79.6175	-9.04109	61.5353
7725.15	-1.29504	-79.8296	-8.82187	62.1859
7725.19	-0.909286	-79.9408	-8.54753	62.8458
7725.22	-0.522877	-79.9639	-8.22524	63.5134
7725.26	-0.136095	-79.9105	-7.86191	64.1867
7725.3	0.250785	-79.7913	-7.46426	64.8628
7725.33	0.637486	-79.6159	-7.03872	65.5385
7725.37	1.02373	-79.3935	-6.59148	66.2105
7725.4	1.40924	-79.1321	-6.12843	66.8752
7725.44	1.79375	-78.8394	-5.65514	67.5291
7725.48	2.17697	-78.5224	-5.17689	68.1686
7725.51	2.55863	-78.1877	-4.69862	68.7904
7725.55	2.93846	-77.8413	-4.22494	69.3914
7725.58	3.31619	-77.4888	-3.76012	69.9685
7725.62	3.69155	-77.1354	-3.3081	70.5192
7725.66	4.06426	-76.786	-2.87249	71.041
7725.69	4.43407	-76.4449	-2.45657	71.5317
7725.73	4.8007	-76.1161	-2.06331	71.9895
7725.76	5.1639	-75.8035	-1.69533	72.4128
7725.8	5.5234	-75.5102	-1.35499	72.8002
7725.84	5.87895	-75.2391	-1.04429	73.1505
7725.87	6.23029	-74.9928	-0.764974	73.4628
7725.91	6.57718	-74.7734	-0.518449	73.7365
7725.94	6.91936	-74.5827	-0.305839	73.9711
7725.98	7.25659	-74.4221	-0.127961	74.1662
7726.02	7.58862	-74.2925	0.0146646	74.3219
7726.05	7.91523	-74.1946	0.12182	74.4382
7726.09	8.23617	-74.1284	0.193586	74.5156
7726.12	8.55122	-74.0939	0.230336	74.5545
7726.16	8.86014	-74.0903	0.23273	74.5557
7726.2	9.16273	-74.1166	0.20171	74.5201
7726.23	9.45876	-74.1716	0.138478	74.4486
7726.27	9.74803	-74.2534	0.0444844	74.3424
7726.3	10.0303	-74.3599	-0.0785945	74.2027
7726.34	10.3054	-74.4887	-0.228882	74.0309
7726.38	10.5732	-74.6368	-0.40433	73.8282
7726.41	10.8333	-74.8013	-0.602747	73.5959
7726.45	11.0857	-74.9787	-0.82183	73.335
7726.48	11.3302	-75.1651	-1.0592	73.0467
7726.52	11.5666	-75.3566	-1.31241	72.7317
7726.56	11.7947	-75.5485	-1.57903	72.3904
7726.59	12.0144	-75.7362	-1.85657	72.023
7726.63	12.2254	-75.9143	-2.1426	71.6291
7726.66	12.4277	-76.0773	-2.43468	71.208
7726.7	12.6212	-76.219	-2.73039	70.7582
7726.74	12.8056	-76.3326	-3.0273	70.278
7726.77	12.9808	-76.4107	-3.32296	69.7648
7726.81	13.1467	-76.4453	-3.61483	69.2156
7726.84	13.3033	-76.4272	-3.90024	68.6268
7726.88	13.4503	-76.3468	-4.17634	67.9941
7726.92	13.5877	-76.1931	-4.43998	67.3132
7726.95	13.7153	-75.9544	-4.68763	66.5791
7726.99	13.8332	-75.6177	-4.91531	65.7871
7727.02	13.9411	-75.1692	-5.11844	64.9323
7727.06	14.0391	-74.594	-5.29178	64.0104
7727.1	14.127	-73.8766	-5.42929	63.018
7727.13	14.2048	-73.0006	-5.52406	61.9524
7727.17	14.2725	-71.9494	-5.56824	60.813
7727.21	14.3299	-70.7066	-5.55298	59.6007
7727.24	14.3771	-69.2561	-5.46842	58.3193
7727.28	14.414	-67.5829	-5.30371	56.9755
7727.31	14.4406	-65.6737	-5.04705	55.5796
7727.35	14.4569	-63.5179	-4.68583	54.1462
7727.39	14.4628	-61.108	-4.20678	52.6944
7727.42	14.4583	-58.4411	-3.59621	51.2487
7727.46	14.4435	-55.5193	-2.84025	49.8388
7727.49	14.4184	-52.3514	-1.92525	48.5009
7727.53	14.383	-48.9534	-0.838135	47.2771
7727.57	14.3372	-45.3493	0.433154	46.2157
7727.6	14.2812	-41.5724	1.89916	45.3707
7727.64	14.215	-37.6645	3.56842	44.8013
7727.67	14.1386	-33.6757	5.44694	44.5696
7727.71	14.0521	-29.662	7.53766	44.7374
7727.75	13.9556	-25.6819	9.84001	45.362
7727.78	13.849	-21.7904	12.3494	46.4893
7727.82	13.7326	-18.0325	15.057	48.1466
7727.85	13.6063	-14.4368	17.9493	50.3353
7727.89	13.4703	-11.0118	21.0077	53.0273
7727.93	13.3246	-7.7461	24.2092	56.1645
7727.96	13.1694	-4.61325	27.5257	59.6646
7728	13.0048	-1.57975	30.9246	63.4289
7728.03	12.8309	1.3869	34.3691	67.3513
7728.07	12.6478	4.31151	37.819	71.3264
7728.11	12.4556	7.207	41.2309	75.2549
7728.14	12.2546	10.0727	44.5596	79.0466
7728.18	12.0447	12.8945	47.7586	82.6227
7728.21	11.8263	15.6466	50.7813	85.9159
7728.25	11.5994	18.2944	53.5821	88.8698
7728.29	11.3642	20.797	56.1175	91.438
7728.32	11.1208	23.1114	58.3474	93.5834
7728.36	10.8695	25.1954	60.2356	95.2758
7728.39	10.6104	27.0112	61.7514	96.4917
7728.43	10.3437	28.5276	62.87	97.2124
7728.47	10.0697	29.7228	63.5733	97.4237
7728.5	9.78837	30.5845	63.8502	97.1158
7728.54	9.50009	31.1104	63.6972	96.2839
7728.57	9.205	31.3067	63.1181	94.9296
7728.61	8.90332	31.1862	62.1243	93.0624
7728.65	8.59528	30.7646	60.7337	90.7027
7728.68	8.28108	30.057	58.9707	87.8843
7728.72	7.96096	29.0733	56.8653	84.6573
7728.75	7.63514	27.813	54.4523	81.0915
7728.79	7.30386	26.2614	51.7699	77.2785
7728.83	6.96735	24.3851	48.8594	73.3337
7728.86	6.62586	22.1326	45.7635	69.3944
7728.9	6.27963	19.4392	42.5254	65.6116
7728.93	5.9289	16.2413	39.188	62.1347
7728.97	5.57393	12.498	35.7928	59.0876
7729.01	5.21497	8.2109	32.3793	56.5477
7729.04	4.85228	3.43189	28.984	54.5361
7729.08	4.48611	-1.74561	25.6402	53.0261
7729.11	4.11674	-7.20553	22.3776	51.9608
7729.15	3.74442	-12.8276	19.2219	51.2714
7729.19	3.36942	-18.4996	16.1947	50.8891
7729.22	2.99201	-24.1235	13.3139	50.7513
7729.26	2.61246	-29.6172	10.5933	50.8039
7729.29	2.23104	-34.9145	8.04336	51.0012
7729.33	1.84802	-39.9634	5.67103	51.3054
7729.37	1.46368	-44.7249	3.48044	51.6857
7729.4	1.0783	-49.1715	1.47311	52.1177
7729.44	0.69214	-53.2857	-0.351663	52.5824
7729.48	0.305487	-57.0586	-1.99642	53.0657
7729.51	-0.081384	-60.4885	-3.46524	53.5581
7729.55	-0.468197	-63.58	-4.76337	54.0533
7729.58	-0.854675	-66.3425	-5.89701	54.5485
7729.62	-1.24054	-68.7894	-6.87305	55.0433
7729.66	-1.62552	-70.9368	-7.69889	55.539
7729.69	-2.00934	-72.8032	-8.38229	56.0386
7729.73	-2.39171	-74.408	-8.93124	56.5456
7729.76	-2.77238	-75.7716	-9.35386	57.0639
7729.8	-3.15106	-76.9142	-9.65835	57.5975
7729.84	-3.52749	-77.8557	-9.85297	58.1497
7729.87	-3.90139	-78.6152	-9.94594	58.7233
7729.91	-4.2725	-79.2109	-9.94547	59.32
7729.94	-4.64056	-79.6599	-9.8597	59.9405
7729.98	-5.00529	-79.9782	-9.69671	60.5848
7730.02	-5.36644	-80.1803	-9.46446	61.2513
7730.05	-5.72375	-80.2797	-9.17083	61.9381
7730.09	-6.07696	-80.289	-8.8235	62.642
7730.12	-6.42583	-80.2194	-8.43001	63.3594
7730.16	-6.7701	-80.0815	-7.99769	64.0862
7730.2	-7.10952	-79.885	-7.53362	64.8178
7730.23	-7.44386	-79.6388	-7.04464	65.5495
7730.27	-7.77287	-79.3513	-6.53728	66.2767
7730.3	-8.09631	-79.0302	-6.01777	66.9947
7730.34	-8.41397	-78.683	-5.49202	67.6989
7730.38	-8.7256	-78.3164	-4.96557	68.3853
7730.41	-9.03099	-77.9369	-4.44362	69.0497
7730.45	-9.32991	-77.5506	-3.93102	69.6886
7730.48	-9.62216	-77.1632	-3.43225	70.2987
7730.52	-9.90752	-76.7799	-2.95141	70.8771
7730.56	-10.1858	-76.4057	-2.49226	71.4211
7730.59	-10.4568	-76.045	-2.0582	71.9286
7730.63	-10.7203	-75.7021	-1.65227	72.3975
7730.66	-10.9761	-75.3806	-1.27716	72.8263
7730.7	-11.2241	-75.0839	-0.935212	73.2135
7730.74	-11.464	-74.815	-0.628411	73.5581
7730.77	-11.6958	-74.5762	-0.358397	73.8594
7730.81	-11.9191	-74.3696	-0.126455	74.1167
7730.84	-12.134	-74.1968	0.0664837	74.3298
7730.88	-12.3402	-74.0589	0.219848	74.4986
7730.92	-12.5375	-73.9566	0.333424	74.6235
7730.95	-12.7258	-73.8901	0.407356	74.7048
7730.99	-12.9051	-73.859	0.442146	74.7433
7731.02	-13.0751	-73.8626	0.43864	74.7399
7731.06	-13.2358	-73.8998	0.398024	74.6958
7731.1	-13.387	-73.9688	0.321804	74.6124
7731.13	-13.5286	-74.0676	0.211784	74.4912
7731.17	-13.6605	-74.1938	0.070044	74.3339
7731.2	-13.7826	-74.3443	-0.101094	74.1421
7731.24	-13.8949	-74.516	-0.299098	73.9178
7731.28	-13.9973	-74.7052	-0.521267	73.6627
7731.31	-14.0896	-74.9081	-0.764765	73.3786
7731.35	-14.1719	-75.1202	-1.02667	73.0669
7731.38	-14.244	-75.3371	-1.30399	72.7292
7731.42	-14.3059	-75.5538	-1.59373	72.3664
7731.46	-14.3576	-75.7651	-1.89291	71.9793
7731.49	-14.399	-75.9653	-2.19856	71.5682
7731.53	-14.4301	-76.1484	-2.50776	71.1329
7731.56	-14.4508	-76.308	-2.81766	70.6727
7731.6	-14.4613	-76.4371	-3.12543	70.1862
7731.64	-14.4613	-76.528	-3.42824	69.6715
7731.67	-14.4511	-76.5727	-3.72327	69.1262
7731.71	-14.4305	-76.5621	-4.00758	68.5469
7731.75	-14.3995	-76.4865	-4.27811	67.9303
7731.78	-14.3583	-76.3352	-4.53156	67.2721
7731.82	-14.3068	-76.0967	-4.76431	66.5681
7731.85	-14.245	-75.7586	-4.97232	65.8139
7731.89	-14.1731	-75.3074	-5.15102	65.0053
7731.93	-14.091	-74.7289	-5.2952	64.1385
7731.96	-13.9988	-74.0082	-5.39888	63.2104
7732	-13.8967	-73.1298	-5.45529	62.2192
7732.03	-13.7845	-72.0782	-5.45672	61.1647
7732.07	-13.6625	-70.8378	-5.39448	60.0488
7732.11	-13.5308	-69.3937	-5.25891	58.8759
7732.14	-13.3893	-67.7322	-5.03938	57.6535
7732.18	-13.2383	-65.8415	-4.72432	56.3928
7732.21	-13.0778	-63.7122	-4.30138	55.1094
7732.25	-12.9079	-61.3384	-3.75756	53.8233
7732.29	-12.7288	-58.7187	-3.07943	52.5598
7732.32	-12.5406	-55.8565	-2.25346	51.3496
7732.36	-12.3434	-52.7619	-1.2663	50.2293
7732.39	-12.1374	-49.4515	-0.105186	49.2412
7732.43	-11.9227	-45.9499	1.24157	48.4331
7732.47	-11.6995	-42.2894	2.78417	47.8577
7732.5	-11.4678	-38.5097	4.53076	47.5712
7732.54	-11.228	-34.6568	6.48696	47.6307
7732.57	-10.9802	-30.7807	8.65533	48.0913
7732.61	-10.7245	-26.931	11.0349	49.0008
7732.65	-10.4611	-23.1529	13.6207	50.3942
7732.68	-10.1902	-19.4811	16.4034	52.2879
7732.72	-9.91208	-15.9362	19.369	54.6742
7732.75	-9.62683	-12.5221	22.4989	57.5199
7732.79	-9.33469	-9.22836	25.7693	60.767
7732.83	-9.03587	-6.0337	29.1519	64.3376
7732.86	-8.73058	-2.91277	32.6138	68.1405
7732.9	-8.41905	0.157726	36.118	72.0782
7732.93	-8.10149	3.19394	39.6237	76.0535
7732.97	-7.77814	6.20164	43.0875	79.9734
7733.01	-7.44921	9.17479	46.4639	83.7529
7733.04	-7.11496	12.0959	49.7061	87.3162
7733.08	-6.77562	14.9372	52.7673	90.5975
7733.11	-6.43143	17.6633	55.602	93.5407
7733.15	-6.08264	20.2337	58.1664	96.0992
7733.19	-5.72949	22.6059	60.4202	98.2345
7733.22	-5.37224	24.7389	62.3272	99.9156
7733.26	-5.01115	26.5954	63.8566	101.118
7733.29	-4.64647	28.1447	64.9833	101.822
7733.33	-4.27847	29.3645	65.6892	102.014
7733.37	-3.90741	30.2413	65.963	101.685
7733.4	-3.53355	30.7705	65.8013	100.832
7733.44	-3.15716	30.9553	65.2076	99.4599
7733.47	-2.77851	30.8046	64.193	97.5814
7733.51	-2.39788	30.3299	62.7754	95.2208
7733.55	-2.01552	29.5424	60.9791	92.4157
7733.58	-1.63173	28.4485	58.8339	89.2193
7733.62	-1.24677	27.0467	56.3745	85.7022
7733.65	-0.860914	25.3239	53.6391	81.9542
7733.69	-0.474444	23.2541	50.6688	78.0836
7733.73	-0.0876341	20.7993	47.5065	74.2137
7733.76	0.299239	17.9156	44.1953	70.4751
7733.8	0.685897	14.5638	40.7785	66.9931
7733.84	1.07207	10.7239	37.2976	63.8713
7733.87	1.45747	6.40696	33.7924	61.1779
7733.91	1.84182	1.6607	30.3	58.9394
7733.94	2.22486	-3.43618	26.8542	57.1445
7733.98	2.60631	-8.78552	23.4851	55.7556
7734.02	2.9859	-14.2827	20.2191	54.7209
7734.05	3.36334	-19.8269	17.0787	53.9843
7734.09	3.73838	-25.327	14.0825	53.4919
7734.12	4.11075	-30.705	11.2452	53.1953
7734.16	4.48017	-35.8961	8.57819	53.0525
7734.2	4.84639	-40.8491	6.08945	53.028
7734.23	5.20914	-45.525	3.78406	53.0931
7734.27	5.56816	-49.8958	1.66452	53.2248
7734.3	5.9232	-53.9433	-0.268914	53.4055
7734.34	6.27399	-57.6581	-2.01786	53.6224
7734.38	6.6203	-61.0379	-3.58549	53.8669
7734.41	6.96188	-64.0864	-4.97628	54.1339
7734.45	7.29847	-66.8126	-6.19568	54.4213
7734.48	7.62983	-69.2291	-7.24994	54.7292
7734.52	7.95574	-71.3515	-8.14594	55.0596
7734.56	8.27596	-73.1975	-8.89101	55.4155
7734.59	8.59025	-74.7861	-9.49282	55.8004
7734.63	8.8984	-76.1367	-9.95931	56.2181
7734.66	9.20018	-77.2691	-10.2986	56.6718
7734.7	9.49537	-78.2023	-10.519	57.1642
7734.74	9.78377	-78.9548	-10.6289	57.6969
7734.77	10.0652	-79.5441	-10.6368	58.2705
7734.81	10.3394	-79.9866	-10.551	58.8845
7734.84	10.6062	-80.2976	-10.3802	59.5371
7734.88	10.8654	-80.4911	-10.1328	60.2254
7734.92	11.1168	-80.5803	-9.81728	60.9457
7734.95	11.3603	-80.5769	-9.44187	61.6932
7734.99	11.5956	-80.4922	-9.0148	62.4626
7735.02	11.8227	-80.3364	-8.54407	63.2483
7735.06	12.0413	-80.1191	-8.03746	64.0441
7735.1	12.2513	-79.8492	-7.50252	64.8441
7735.13	12.4525	-79.5352	-6.94649	65.6422
7735.17	12.6448	-79.1851	-6.3763	66.4325
7735.2	12.828	-78.8066	-5.79854	67.2095
7735.24	13.0021	-78.4068	-5.21943	67.968
7735.28	13.1669	-77.9928	-4.64481	68.7031
7735.31	13.3222	-77.5709	-4.08016	69.4106
7735.35	13.468	-77.1476	-3.53053	70.0865
7735.38	13.6042	-76.7285	-3.00061	70.7272
7735.42	13.7306	-76.3191	-2.49466	71.3298
7735.46	13.8472	-75.9247	-2.01657	71.8916
7735.49	13.9539	-75.5498	-1.56982	72.4102
7735.53	14.0507	-75.1987	-1.1575	72.8837
7735.56	14.1373	-74.8753	-0.782295	73.3107
7735.6	14.2139	-74.5828	-0.446493	73.6898
7735.64	14.2802	-74.3241	-0.151973	74.0201
7735.67	14.3364	-74.1015	0.0997995	74.3011
7735.71	14.3823	-73.917	0.307774	74.5325
7735.74	14.4179	-73.7716	0.471323	74.7143
7735.78	14.4432	-73.6663	0.590249	74.8468
7735.82	14.4582	-73.6011	0.664777	74.9307
7735.85	14.4628	-73.5758	0.69556	74.9669
7735.89	14.457	-73.5894	0.683666	74.9567
7735.92	14.4409	-73.6404	0.630569	74.9015
7735.96	14.4145	-73.7269	0.538126	74.8032
7736	14.3778	-73.8465	0.408556	74.6636
7736.03	14.3308	-73.9962	0.244404	74.485
7736.07	14.2735	-74.1726	0.0485076	74.2696
7736.11	14.206	-74.372	-0.176047	74.0199
7736.14	14.1284	-74.5902	-0.42597	73.7383
7736.18	14.0406	-74.8228	-0.69782	73.4271
7736.21	13.9428	-75.0647	-0.988049	73.0886
7736.25	13.835	-75.311	-1.29305	72.7249
7736.29	13.7173	-75.5562	-1.60921	72.3378
7736.32	13.5898	-75.7945	-1.93295	71.9286
7736.36	13.4526	-76.0199	-2.26072	71.4985
7736.39	13.3057	-76.226	-2.58909	71.0478
7736.43	13.1493	-76.4059	-2.91469	70.5766
7736.47	12.9835	-76.5526	-3.23426	70.0841
7736.5	12.8085	-76.6582	-3.54459	69.569
7736.54	12.6242	-76.7145	-3.84252	69.0294
7736.57	12.4309	-76.7125	-4.12485	68.4628
7736.61	12.2288	-76.6427	-4.3883	67.8661
7736.65	12.0178	-76.4947	-4.62945	67.2357
7736.68	11.7983	-76.2572	-4.84459	66.568
7736.72	11.5704	-75.9183	-5.02965	65.859
7736.75	11.3341	-75.4651	-5.18008	65.105
7736.79	11.0898	-74.8842	-5.29075	64.3027
7736.83	10.8375	-74.1614	-5.35582	63.4498
7736.86	10.5774	-73.2822	-5.36868	62.5449
7736.9	10.3098	-72.232	-5.32179	61.5884
7736.93	10.0348	-70.9964	-5.20673	60.583
7736.97	9.75264	-69.5618	-5.01408	59.5336
7737.01	9.46349	-67.9156	-4.73347	58.4486
7737.04	9.16756	-66.0474	-4.35365	57.34
7737.08	8.86508	-63.9491	-3.86257	56.2239
7737.11	8.55625	-61.6162	-3.24755	55.1211
7737.15	8.2413	-59.0483	-2.49551	54.0573
7737.19	7.92045	-56.2501	-1.59325	53.0636
7737.22	7.59394	-53.232	-0.527786	52.1764
7737.26	7.26199	-50.011	0.713261	51.4375
7737.29	6.92484	-46.6107	2.14122	50.8931
7737.33	6.58274	-43.0615	3.76589	50.5933
7737.37	6.23593	-39.4001	5.59504	50.5902
7737.4	5.88466	-35.6673	7.63389	50.9351
7737.44	5.52917	-31.9062	9.88459	51.6754
7737.47	5.16973	-28.1584	12.3458	52.8499
7737.51	4.80659	-24.4601	15.012	54.4841
7737.55	4.44001	-20.8381	17.8737	56.5855
7737.58	4.07025	-17.3073	20.9165	59.1402
7737.62	3.69758	-13.8699	24.1211	62.1122
7737.65	3.32227	-10.5173	27.4638	65.4448
7737.69	2.94458	-7.23363	30.9157	69.065
7737.73	2.56478	-4.00112	34.4436	72.8883
7737.76	2.18314	-0.804537	38.0102	76.825
7737.8	1.79994	2.36465	41.5746	80.7846
7737.83	1.41546	5.50579	45.0931	84.6804
7737.87	1.02996	8.60798	48.5198	88.4316
7737.91	0.643727	11.6503	51.8079	91.9655
7737.94	0.257031	14.6029	54.9105	95.2181
7737.98	-0.129848	17.4292	57.7816	98.134
7738.01	-0.516635	20.0886	60.3776	100.667
7738.05	-0.903051	22.5386	62.6577	102.777
7738.09	-1.28882	24.7382	64.5859	104.434
7738.12	-1.67367	26.6504	66.1309	105.611
7738.16	-2.05732	28.2442	67.2676	106.291
7738.2	-2.4395	29.4962	67.9777	106.459
7738.23	-2.81993	30.3913	68.2498	106.108
7738.27	-3.19834	30.9227	68.0801	105.238
7738.3	-3.57447	31.0905	67.472	103.854
7738.34	-3.94804	30.9002	66.4364	101.973
7738.38	-4.31878	30.3602	64.991	99.6217
7738.41	-4.68643	29.4783	63.1598	96.8413
7738.45	-5.05073	28.2592	60.9725	93.6859
7738.48	-5.41141	26.7013	58.4637	90.2261
7738.52	-5.76823	24.7948	55.6715	86.5482
7738.56	-6.12091	22.5211	52.6369	82.7527
7738.59	-6.46921	19.8551	49.4028	78.9504
7738.63	-6.81289	16.77	46.0125	75.255
7738.66	-7.15169	13.246	42.5094	71.7727
7738.7	-7.48537	9.2797	38.9354	68.5911
7738.74	-7.81369	4.89171	35.3306	65.7695
7738.77	-8.13643	0.129525	31.7325	63.3355
7738.81	-8.45334	-4.93621	28.1756	61.2874
7738.84	-8.7642	-10.2195	24.6906	59.6007
7738.88	-9.06879	-15.6282	21.3047	58.2377
7738.92	-9.36689	-21.072	18.0413	57.1546
7738.95	-9.65829	-26.4675	14.9198	56.3072
7738.99	-9.94278	-31.7419	11.9561	55.6541
7739.02	-10.2201	-36.8339	9.16243	55.1588
7739.06	-10.4902	-41.6943	6.54786	54.79
7739.1	-10.7528	-46.2849	4.11858	54.5221
7739.13	-11.0076	-50.5785	1.87814	54.3348
7739.17	-11.2546	-54.5569	-0.17215	54.2126
7739.2	-11.4935	-58.2104	-2.03292	54.1446
7739.24	-11.7242	-61.5367	-3.7064	54.1238
7739.28	-11.9465	-64.539	-5.19621	54.1466
7739.31	-12.1603	-67.2259	-6.50702	54.2119
7739.35	-12.3654	-69.6095	-7.64444	54.3207
7739.38	-12.5616	-71.705	-8.61477	54.4754
7739.42	-12.7488	-73.5294	-9.42491	54.6795
7739.46	-12.9269	-75.101	-10.0822	54.9365
7739.49	-13.0957	-76.4387	-10.5945	55.2496
7739.53	-13.2552	-77.5613	-10.9698	55.6217
7739.56	-13.4052	-78.4873	-11.2164	56.0544
7739.6	-13.5456	-79.2343	-11.343	56.5482
7739.64	-13.6763	-79.819	-11.3583	57.1025
7739.67	-13.7972	-80.2571	-11.2711	57.715
7739.71	-13.9083	-80.5631	-11.0904	58.3823
7739.74	-14.0094	-80.7503	-10.8253	59.0997
7739.78	-14.1005	-80.8311	-10.4847	59.8616
7739.82	-14.1814	-80.817	-10.0778	60.6615
7739.85	-14.2523	-80.7187	-9.61329	61.4922
7739.89	-14.3129	-80.5462	-9.10001	62.3462
7739.92	-14.3633	-80.3089	-8.54648	63.2159
7739.96	-14.4034	-80.0156	-7.96101	64.0936
7740	-14.4332	-79.6751	-7.3516	64.9719
7740.03	-14.4527	-79.2956	-6.72595	65.8437
7740.07	-14.4618	-78.8849	-6.09139	66.7021
7740.1	-14.4606	-78.4508	-5.45487	67.541
7740.14	-14.4491	-78.0006	-4.82294	68.3547
7740.18	-14.4272	-77.5415	-4.20175	69.138
7740.21	-14.3949	-77.0803	-3.597	69.8863
7740.25	-14.3524	-76.6235	-3.01399	70.5955
7740.28	-14.2996	-76.1771	-2.45757	71.262
7740.32	-14.2366	-75.7471	-1.93214	71.8828
7740.36	-14.1634	-75.3385	-1.44169	72.4551
7740.39	-14.08	-74.9564	-0.989743	72.9769
7740.43	-13.9866	-74.605	-0.579364	73.4463
7740.47	-13.8832	-74.2882	-0.213169	73.8619
7740.5	-13.7698	-74.0093	0.106697	74.2227
7740.54	-13.6466	-73.771	0.37857	74.5281
7740.57	-13.5136	-73.5753	0.601274	74.7778
7740.61	-13.3709	-73.4236	0.774128	74.9719
7740.65	-13.2187	-73.317	0.896957	75.1109
7740.68	-13.057	-73.2554	0.970091	75.1956
7740.72	-12.886	-73.2385	0.994363	75.2273
7740.75	-12.7057	-73.2652	0.971103	75.2074
7740.79	-12.5164	-73.3337	0.902121	75.1379
7740.83	-12.3181	-73.4416	0.789683	75.021
7740.86	-12.111	-73.5862	0.636485	74.8592
7740.9	-11.8952	-73.764	0.44561	74.6552
7740.93	-11.6709	-73.971	0.220487	74.4119
7740.97	-11.4383	-74.2028	-0.0351627	74.1325
7741.01	-11.1974	-74.4547	-0.317381	73.82
7741.04	-10.9486	-74.7216	-0.622032	73.4775
7741.08	-10.6919	-74.9979	-0.944865	73.1082
7741.11	-10.4276	-75.2779	-1.28157	72.7148
7741.15	-10.1558	-75.5556	-1.62784	72.2999
7741.19	-9.87673	-75.8247	-1.97942	71.8658
7741.22	-9.59061	-76.0786	-2.33215	71.4143
7741.26	-9.29762	-76.3105	-2.68197	70.9466
7741.29	-8.99798	-76.5134	-3.02501	70.4634
7741.33	-8.6919	-76.6798	-3.35749	69.9648
7741.37	-8.3796	-76.8017	-3.6758	69.4501
7741.4	-8.0613	-76.8709	-3.97643	68.9181
7741.44	-7.73724	-76.8786	-4.25592	68.3668
7741.47	-7.40763	-76.8153	-4.51077	67.7938
7741.51	-7.07273	-76.6709	-4.73743	67.1961
7741.55	-6.73277	-76.4347	-4.93213	66.5704
7741.58	-6.38799	-76.0951	-5.0908	65.9135
7741.62	-6.03863	-75.6401	-5.20898	65.2221
7741.65	-5.68496	-75.0568	-5.28164	64.4936
7741.69	-5.32722	-74.3321	-5.30313	63.7258
7741.73	-4.96566	-73.4524	-5.26705	62.9183
7741.76	-4.60056	-72.4042	-5.16613	62.0719
7741.8	-4.23216	-71.1742	-4.99222	61.1898
7741.83	-3.86073	-69.75	-4.73623	60.2775
7741.87	-3.48654	-68.1204	-4.38813	59.3441
7741.91	-3.10985	-66.276	-3.93703	58.402
7741.94	-2.73094	-64.2102	-3.37124	57.4677
7741.98	-2.35007	-61.9193	-2.67847	56.5623
7742.01	-1.96752	-59.4039	-1.84603	55.7118
7742.05	-1.58357	-56.6691	-0.861105	54.9469
7742.09	-1.19848	-53.7255	0.288878	54.3032
7742.12	-0.812533	-50.5893	1.6159	53.8211
7742.16	-0.426005	-47.2827	3.13088	53.5445
7742.19	-0.0391723	-43.8335	4.84321	53.5199
7742.23	0.347689	-40.2741	6.76025	53.7946
7742.27	0.734301	-36.64	8.88681	54.4136
7742.3	1.12039	-32.9677	11.2246	55.417
7742.34	1.50567	-29.2912	13.772	56.8352
7742.37	1.88988	-25.6395	16.523	58.6856
7742.41	2.27274	-22.0334	19.4677	60.9689
7742.45	2.65397	-18.4843	22.5914	63.6671
7742.48	3.0333	-14.9937	25.8746	66.7429
7742.52	3.41046	-11.5558	29.2929	70.1417
7742.56	3.78518	-8.16	32.8174	73.7948
7742.59	4.15719	-4.79511	36.4146	77.6242
7742.63	4.52622	-1.45311	40.0468	81.5466
7742.66	4.89202	1.8678	43.6728	85.4779
7742.7	5.25432	5.1612	47.2489	89.3365
7742.74	5.61285	8.41161	50.7288	93.0461
7742.77	5.96737	11.5947	54.0657	96.5367
7742.81	6.31762	14.6783	57.2123	99.7462
7742.84	6.66335	17.6246	60.1225	102.62
7742.88	7.00432	20.3918	62.7525	105.113
7742.92	7.34026	22.9371	65.0614	107.186
7742.95	7.67096	25.219	67.0128	108.806
7742.99	7.99617	27.2	68.5753	109.951
7743.02	8.31565	28.848	69.7236	110.599
7743.06	8.62919	30.1384	70.4391	110.74
7743.1	8.93655	31.0541	70.7102	110.366
7743.13	9.23752	31.5857	70.5327	109.48
7743.17	9.53187	31.7308	69.9099	108.089
7743.2	9.81941	31.4918	68.8524	106.213
7743.24	10.0999	30.8741	67.3775	103.881
7743.28	10.3732	29.8838	65.5092	101.135
7743.31	10.6391	28.5245	63.2768	98.0292
7743.35	10.8973	26.796	60.7148	94.6336
7743.38	11.1477	24.6927	57.8612	91.0298
7743.42	11.3902	22.2039	54.7571	87.3103
7743.46	11.6245	19.3163	51.4452	83.5742
7743.49	11.8505	16.0181	47.9692	79.9203
7743.53	12.0681	12.3055	44.3725	76.4394
7743.56	12.2769	8.18913	40.6974	73.2057
7743.6	12.477	3.69818	36.9846	70.271
7743.64	12.6682	-1.11802	33.272	67.662
7743.67	12.8503	-6.1931	29.5947	65.3826
7743.71	13.0232	-11.4493	25.9844	63.4181
7743.74	13.1868	-16.8039	22.469	61.742
7743.78	13.341	-22.1757	19.0729	60.3215
7743.82	13.4856	-27.4887	15.8165	59.1217
7743.85	13.6206	-32.676	12.7167	58.1095
7743.89	13.7458	-37.6805	9.78701	57.2545
7743.92	13.8611	-42.4557	7.03758	56.5309
7743.96	13.9666	-46.9657	4.47576	55.9172
7744	14.0621	-51.1841	2.10624	55.3966
7744.03	14.1475	-55.094	-0.0685623	54.9568
7744.07	14.2227	-58.6859	-2.04821	54.5894
7744.1	14.2878	-61.9575	-3.83396	54.2896
7744.14	14.3427	-64.9123	-5.42851	54.0553
7744.18	14.3873	-67.5586	-6.83576	53.8871
7744.21	14.4216	-69.9083	-8.0606	53.7871
7744.25	14.4456	-71.976	-9.10878	53.7585
7744.28	14.4593	-73.7786	-9.98677	53.805
7744.32	14.4626	-75.3335	-10.7016	53.9303
7744.36	14.4556	-76.6592	-11.2609	54.1373
7744.39	14.4382	-77.7736	-11.6727	54.4281
7744.43	14.4105	-78.6943	-11.9455	54.8033
7744.46	14.3725	-79.4382	-12.0879	55.2624
7744.5	14.3242	-80.0211	-12.1091	55.8028
7744.54	14.2656	-80.4577	-12.0184	56.4208
7744.57	14.1968	-80.7616	-11.8253	57.111
7744.61	14.1179	-80.9454	-11.5394	57.8666
7744.64	14.0289	-81.0207	-11.1704	58.6799
7744.68	13.9298	-80.9984	-10.728	59.5424
7744.72	13.8208	-80.8886	-10.2218	60.4449
7744.75	13.7019	-80.701	-9.6615	61.378
7744.79	13.5731	-80.4449	-9.0563	62.3323
7744.83	13.4347	-80.129	-8.41538	63.2982
7744.86	13.2866	-79.7622	-7.74758	64.267
7744.9	13.1291	-79.3528	-7.06139	65.23
7744.93	12.9621	-78.9092	-6.36497	66.1793
7744.97	12.7859	-78.4396	-5.66605	67.1075
7745.01	12.6005	-77.9518	-4.97194	68.0079
7745.04	12.4061	-77.4537	-4.28954	68.8747
7745.08	12.2028	-76.9528	-3.62525	69.7023
7745.11	11.9908	-76.4563	-2.98505	70.4862
7745.15	11.7702	-75.971	-2.3744	71.2222
7745.19	11.5412	-75.5034	-1.79832	71.9068
7745.22	11.3039	-75.0596	-1.26131	72.537
7745.26	11.0586	-74.645	-0.767373	73.1103
7745.29	10.8053	-74.2647	-0.320017	73.6247
7745.33	10.5443	-73.923	0.077792	74.0786
7745.37	10.2758	-73.6237	0.42362	74.471
7745.4	9.99985	-73.3699	0.715588	74.8011
7745.44	9.7168	-73.164	0.952386	75.0688
7745.47	9.42678	-73.0076	1.13329	75.2742
7745.51	9.13003	-72.9017	1.25815	75.418
7745.55	8.82674	-72.8464	1.32744	75.5013
7745.58	8.51713	-72.8411	1.34219	75.5255
7745.62	8.20143	-72.8846	1.30406	75.4927
7745.65	7.87986	-72.9746	1.21523	75.4051
7745.69	7.55265	-73.1086	1.07844	75.2655
7745.73	7.22004	-73.283	0.89695	75.0769
7745.76	6.88226	-73.4938	0.67445	74.8427
7745.8	6.53955	-73.7366	0.415047	74.5667
7745.83	6.19217	-74.0061	0.123184	74.2525
7745.87	5.84035	-74.297	-0.196419	73.9042
7745.91	5.48436	-74.6033	-0.538845	73.5256
7745.94	5.12444	-74.9189	-0.899049	73.1208
7745.98	4.76085	-75.2373	-1.27193	72.6934
7746.01	4.39386	-75.5518	-1.65241	72.247
7746.05	4.02373	-75.8556	-2.03549	71.7846
7746.09	3.65071	-76.1415	-2.41628	71.309
7746.12	3.27508	-76.4024	-2.79011	70.8222
7746.16	2.89711	-76.6308	-3.15249	70.3258
7746.19	2.51707	-76.8189	-3.49913	69.8207
7746.23	2.13522	-76.9588	-3.82599	69.3069
7746.27	1.75185	-77.0422	-4.12917	68.7838
7746.3	1.36722	-77.0602	-4.40493	68.2504
7746.34	0.981613	-77.0037	-4.6496	67.7045
7746.37	0.595306	-76.8629	-4.8595	67.1439
7746.41	0.208572	-76.6276	-5.03083	66.566
7746.45	-0.178311	-76.2869	-5.15956	65.9677
7746.48	-0.565066	-75.8292	-5.24134	65.3466
7746.52	-0.951417	-75.2428	-5.27132	64.7002
7746.55	-1.33709	-74.5153	-5.24408	64.0271
7746.59	-1.7218	-73.6342	-5.1535	63.3272
7746.63	-2.10528	-72.587	-4.99265	62.6017
7746.66	-2.48726	-71.3618	-4.75372	61.8543
7746.7	-2.86745	-69.9471	-4.428	61.0911
7746.73	-3.24559	-68.3331	-4.00588	60.3213
7746.77	-3.62141	-66.5115	-3.47688	59.5577
7746.81	-3.99464	-64.4765	-2.82974	58.817
7746.84	-4.36501	-62.2254	-2.05261	58.1202
7746.88	-4.73226	-59.7592	-1.13324	57.4927
7746.91	-5.09612	-57.0832	-0.0592548	56.9647
7746.95	-5.45633	-54.2074	1.18148	56.5704
7746.99	-5.81264	-51.1469	2.60051	56.3479
7747.02	-6.16479	-47.9216	4.20832	56.3383
7747.06	-6.51252	-44.5562	6.01388	56.584
7747.1	-6.8556	-41.0788	8.02412	57.127
7747.13	-7.19377	-37.5194	10.2434	58.0063
7747.17	-7.5268	-33.9082	12.6732	59.2546
7747.2	-7.85443	-30.273	15.3112	60.8954
7747.24	-8.17645	-26.6367	18.1514	62.9395
7747.28	-8.49262	-23.0159	21.1832	65.3823
7747.31	-8.8027	-19.4196	24.3917	68.203
7747.35	-9.10649	-15.85	27.757	71.3641
7747.38	-9.40377	-12.304	31.2546	74.8131
7747.42	-9.69431	-8.77579	34.8551	78.4859
7747.46	-9.97792	-5.26024	38.5247	82.3096
7747.49	-10.2544	-1.75562	42.2256	86.2068
7747.53	-10.5235	1.73385	45.9164	90.099
7747.56	-10.7851	5.1965	49.553	93.9095
7747.6	-11.039	8.6125	53.0891	97.5656
7747.64	-11.285	11.9541	56.4774	101.001
7747.67	-11.5229	15.1868	59.6706	104.154
7747.71	-11.7525	18.2708	62.6224	106.974
7747.74	-11.9738	21.1629	65.2886	109.414
7747.78	-12.1865	23.8194	67.6283	111.437
7747.82	-12.3904	26.1976	69.6047	113.012
7747.85	-12.5855	28.2589	71.1862	114.113
7747.89	-12.7716	29.9698	72.3472	114.725
7747.92	-12.9486	31.3036	73.0688	114.834
7747.96	-13.1162	32.2412	73.339	114.437
7748	-13.2745	32.7707	73.1534	113.536
7748.03	-13.4233	32.8868	72.5149	112.143
7748.07	-13.5625	32.5894	71.4338	110.278
7748.1	-13.692	31.8819	69.9272	107.972
7748.14	-13.8117	30.7689	68.0186	105.268
7748.18	-13.9215	29.2545	65.7375	102.221
7748.21	-14.0214	27.3406	63.1179	98.8951
7748.25	-14.1112	25.0269	60.1978	95.3687
7748.28	-14.1909	22.3108	57.0183	91.7257
7748.32	-14.2604	19.1902	53.6221	88.0541
7748.36	-14.3198	15.6668	50.0532	84.4397
7748.39	-14.3689	11.7507	46.3553	80.9598
7748.43	-14.4077	7.46422	42.571	77.6778
7748.46	-14.4362	2.84455	38.7415	74.6385
7748.5	-14.4544	-2.05634	34.9055	71.8674
7748.54	-14.4623	-7.17416	31.0988	69.3717
7748.57	-14.4597	-12.4366	27.3538	67.1441
7748.61	-14.4469	-17.7683	23.6995	65.1672
7748.64	-14.4237	-23.0953	20.1612	63.4176
7748.68	-14.3902	-28.3486	16.7606	61.8697
7748.72	-14.3464	-33.4668	13.5157	60.4982
7748.75	-14.2923	-38.3975	10.4412	59.2799
7748.79	-14.228	-43.0977	7.54845	58.1946
7748.82	-14.1535	-47.534	4.8461	57.2262
7748.86	-14.0689	-51.6821	2.34003	56.3621
7748.9	-13.9742	-55.5261	0.0338103	55.5937
7748.93	-13.8695	-59.0577	-2.07101	54.9157
7748.97	-13.7549	-62.2753	-3.97465	54.3259
7749	-13.6304	-65.1826	-5.67889	53.8248
7749.04	-13.4962	-67.7881	-7.18678	53.4145
7749.08	-13.3524	-70.1037	-8.50253	53.0986
7749.11	-13.199	-72.144	-9.63132	52.8814
7749.15	-13.0361	-73.9253	-10.5792	52.767
7749.19	-12.8639	-75.4648	-11.3528	52.7592
7749.22	-12.6825	-76.7801	-11.9597	52.8607
7749.26	-12.492	-77.8886	-12.4079	53.0727
7749.29	-12.2926	-78.807	-12.706	53.395
7749.33	-12.0844	-79.5511	-12.8629	53.8254
7749.37	-11.8676	-80.1357	-12.888	54.3597
7749.4	-11.6422	-80.5745	-12.7913	54.992
7749.44	-11.4085	-80.8802	-12.5826	55.715
7749.47	-11.1667	-81.0642	-12.2723	56.5196
7749.51	-10.9169	-81.1375	-11.8709	57.3958
7749.55	-10.6592	-81.11	-11.3887	58.3327
7749.58	-10.3939	-80.9914	-10.8362	59.319
7749.62	-10.1212	-80.7909	-10.2239	60.3431
7749.65	-9.84127	-80.5175	-9.56196	61.3936
7749.69	-9.55428	-80.18	-8.86035	62.4593
7749.73	-9.26045	-79.7872	-8.12882	63.5296
7749.76	-8.95999	-79.3478	-7.37675	64.5943
7749.8	-8.65311	-78.8707	-6.61316	65.6444
7749.83	-8.34005	-78.3644	-5.84662	66.6711
7749.87	-8.02102	-77.8376	-5.0853	67.667
7749.91	-7.69625	-77.2987	-4.33687	68.625
7749.94	-7.36597	-76.7562	-3.60851	69.5391
7749.98	-7.03042	-76.2179	-2.90693	70.404
7750.01	-6.68984	-75.6916	-2.23829	71.2151
7750.05	-6.34447	-75.1847	-1.60823	71.9682
7750.09	-5.99456	-74.7039	-1.02186	72.6602
7750.12	-5.64037	-74.2555	-0.483705	73.2881
7750.16	-5.28213	-73.8453	0.00226528	73.8498
7750.19	-4.92012	-73.4782	0.432689	74.3436
7750.23	-4.55458	-73.1586	0.804821	74.7683
7750.27	-4.18579	-72.89	1.11655	75.1231
7750.3	-3.814	-72.6751	1.36644	75.408
7750.34	-3.43948	-72.5158	1.5537	75.6232
7750.37	-3.0625	-72.4132	1.67827	75.7697
7750.41	-2.68333	-72.3672	1.74074	75.8487
7750.45	-2.30224	-72.3773	1.74243	75.8622
7750.48	-1.9195	-72.4417	1.68533	75.8124
7750.52	-1.53539	-72.5581	1.57209	75.7023
7750.55	-1.15018	-72.7231	1.40601	75.5351
7750.59	-0.764143	-72.9328	1.19094	75.3146
7750.63	-0.377562	-73.1824	0.931302	75.045
7750.66	0.00928984	-73.4666	0.631962	74.7306
7750.7	0.396135	-73.7797	0.298185	74.3761
7750.73	0.782697	-74.1152	-0.0644522	73.9863
7750.77	1.1687	-74.4666	-0.450151	73.5663
7750.81	1.55386	-74.8267	-0.852977	73.1208
7750.84	1.93792	-75.1885	-1.26695	72.6546
7750.88	2.32058	-75.5444	-1.68612	72.1722
7750.91	2.70159	-75.8871	-2.10466	71.6777
7750.95	3.08066	-76.2087	-2.51694	71.1748
7750.99	3.45753	-76.5017	-2.91754	70.6666
7751.02	3.83193	-76.7581	-3.30134	70.1554
7751.06	4.20358	-76.97	-3.66351	69.643
7751.09	4.57222	-77.1293	-3.99951	69.1303
7751.13	4.9376	-77.2277	-4.30509	68.6175
7751.17	5.29944	-77.2564	-4.57623	68.104
7751.2	5.65749	-77.2067	-4.80906	67.5886
7751.24	6.01148	-77.069	-4.99982	67.0694
7751.27	6.36118	-76.8337	-5.1447	66.5443
7751.31	6.70633	-76.4906	-5.23978	66.011
7751.35	7.04668	-76.0288	-5.28085	65.4671
7751.38	7.38198	-75.4375	-5.26332	64.9109
7751.42	7.712	-74.7053	-5.18205	64.3412
7751.46	8.03651	-73.8207	-5.03127	63.7581
7751.49	8.35526	-72.7723	-4.80444	63.1635
7751.53	8.66803	-71.5494	-4.49419	62.561
7751.56	8.9746	-70.1416	-4.09227	61.9571
7751.6	9.27475	-68.5401	-3.58952	61.3611
7751.64	9.56827	-66.7377	-2.97596	60.7858
7751.67	9.85493	-64.7294	-2.24082	60.2477
7751.71	10.1345	-62.5129	-1.37273	59.7674
7751.74	10.4069	-60.0895	-0.359947	59.3696
7751.78	10.6718	-57.4642	0.809425	59.083
7751.82	10.9291	-54.646	2.14706	58.9401
7751.85	11.1786	-51.6484	3.66402	58.9764
7751.89	11.42	-48.4888	5.37034	59.2295
7751.92	11.6533	-45.1884	7.27456	59.7375
7751.96	11.8783	-41.7708	9.38317	60.5371
7752	12.0947	-38.2611	11.7002	61.6614
7752.03	12.3025	-34.6838	14.2265	63.1368
7752.07	12.5015	-31.0612	16.9596	64.9805
7752.1	12.6915	-27.4119	19.893	67.1979
7752.14	12.8725	-23.749	23.0159	69.7808
7752.18	13.0442	-20.0804	26.3129	72.7063
7752.21	13.2067	-16.4092	29.764	75.9373
7752.25	13.3596	-12.7352	33.3442	79.4235
7752.28	13.503	-9.05685	37.0239	83.1047
7752.32	13.6368	-5.37442	40.7691	86.9127
7752.36	13.7608	-1.69177	44.5418	90.7753
7752.39	13.8749	1.98149	48.3002	94.6189
7752.43	13.9791	5.62884	52	98.3712
7752.46	14.0733	9.22631	55.5948	101.963
7752.5	14.1574	12.7428	59.0371	105.331
7752.54	14.2315	16.141	62.2792	108.417
7752.57	14.2953	19.379	65.2747	111.17
7752.61	14.3489	22.4117	67.9791	113.546
7752.64	14.3922	25.1938	70.3512	115.509
7752.68	14.4252	27.6811	72.3538	117.027
7752.72	14.4479	29.8331	73.9552	118.077
7752.75	14.4603	31.6142	75.1294	118.645
7752.79	14.4623	32.9957	75.857	118.718
7752.82	14.454	33.9557	76.1258	118.296
7752.86	14.4353	34.4799	75.931	117.382
7752.9	14.4063	34.5603	75.2752	115.99
7752.93	14.367	34.1947	74.1682	114.142
7752.97	14.3174	33.3847	72.6269	111.869
7753	14.2575	32.1346	70.6745	109.214
7753.04	14.1875	30.4498	68.3403	106.231
7753.08	14.1073	28.3355	65.6581	102.981
7753.11	14.017	25.7972	62.6658	99.5345
7753.15	13.9167	22.8408	59.4046	95.9684
7753.18	13.8064	19.4753	55.9175	92.3597
7753.22	13.6863	15.7145	52.2483	88.7821
7753.26	13.5563	11.5808	48.4413	85.3018
7753.29	13.4167	7.10693	44.5397	81.9724
7753.33	13.2674	2.33707	40.585	78.833
7753.36	13.1087	-2.67372	36.6168	75.9074
7753.4	12.9405	-7.86196	32.6717	73.2054
7753.44	12.7632	-13.1591	28.783	70.7252
7753.47	12.5766	-18.4951	24.9809	68.4569
7753.51	12.3811	-23.8022	21.2917	66.3856
7753.55	12.1767	-29.0174	17.7382	64.4939
7753.58	11.9636	-34.0847	14.3399	62.7645
7753.62	11.742	-38.9561	11.1126	61.1812
7753.65	11.5119	-43.5925	8.06898	59.7304
7753.69	11.2736	-47.9633	5.21901	58.4014
7753.73	11.0273	-52.0468	2.56983	57.1865
7753.76	10.773	-55.8289	0.126238	56.0814
7753.8	10.5111	-59.3027	-2.10908	55.0846
7753.83	10.2416	-62.4676	-4.1353	54.1971
7753.87	9.96478	-65.3283	-5.9532	53.4219
7753.91	9.68084	-67.8935	-7.56503	52.7635
7753.94	9.38997	-70.1757	-8.97427	52.2271
7753.98	9.09239	-72.1893	-10.1855	51.8183
7754.01	8.78829	-73.9506	-11.2044	51.5419
7754.05	8.47791	-75.4765	-12.0373	51.4019
7754.09	8.16146	-76.784	-12.6916	51.4008
7754.12	7.83917	-77.8896	-13.1753	51.5389
7754.16	7.51127	-78.8092	-13.4972	51.8149
7754.19	7.178	-79.5576	-13.6664	52.2248
7754.23	6.83959	-80.1484	-13.6929	52.7626
7754.27	6.49629	-80.5941	-13.5869	53.4203
7754.3	6.14833	-80.9061	-13.3591	54.1879
7754.34	5.79598	-81.0949	-13.0204	55.054
7754.37	5.43948	-81.1702	-12.5821	56.006
7754.41	5.07909	-81.1413	-12.0554	57.0306
7754.45	4.71506	-81.0171	-11.4516	58.1139
7754.48	4.34766	-80.8062	-10.7821	59.2421
7754.52	3.97715	-80.5174	-10.0579	60.4016
7754.55	3.60379	-80.1595	-9.29007	61.5793
7754.59	3.22786	-79.7412	-8.48923	62.7628
7754.63	2.84961	-79.2718	-7.66569	63.9404
7754.66	2.46933	-78.7604	-6.82941	65.1016
7754.7	2.08727	-78.2163	-5.98988	66.2366
7754.73	1.70373	-77.6489	-5.15614	67.3366
7754.77	1.31896	-77.0675	-4.33675	68.3939
7754.81	0.933254	-76.4812	-3.53973	69.4017
7754.84	0.546878	-75.899	-2.77256	70.3539
7754.88	0.16011	-75.3297	-2.04216	71.2454
7754.91	-0.226772	-74.7815	-1.35488	72.0717
7754.95	-0.613491	-74.262	-0.716458	72.8291
7754.99	-0.999772	-73.7785	-0.132012	73.5145
7755.02	-1.38534	-73.3375	0.39399	74.1255
7755.06	-1.76991	-72.9447	0.857761	74.6602
7755.09	-2.15322	-72.605	1.25622	75.1175
7755.13	-2.53498	-72.3225	1.58701	75.4965
7755.17	-2.91494	-72.1002	1.84854	75.7973
7755.2	-3.2928	-71.9403	2.04002	76.0203
7755.24	-3.66831	-71.8438	2.16143	76.1667
7755.27	-4.0412	-71.8108	2.21358	76.238
7755.31	-4.41119	-71.8405	2.19807	76.2366
7755.35	-4.77803	-71.9307	2.11731	76.1654
7755.38	-5.14144	-72.0787	1.97449	76.0277
7755.42	-5.50118	-72.2805	1.77351	75.8275
7755.45	-5.85698	-72.5314	1.51896	75.5693
7755.49	-6.20859	-72.826	1.21604	75.2581
7755.53	-6.55576	-73.1582	0.870506	74.8992
7755.56	-6.89824	-73.5211	0.488532	74.4981
7755.6	-7.23578	-73.9075	0.076663	74.0608
7755.63	-7.56814	-74.3099	-0.358316	73.5933
7755.67	-7.89508	-74.7203	-0.809476	73.1014
7755.71	-8.21638	-75.1307	-1.26986	72.591
7755.74	-8.5318	-75.533	-1.73256	72.0678
7755.78	-8.84111	-75.9187	-2.19086	71.537
7755.82	-9.14409	-76.2798	-2.63826	71.0032
7755.85	-9.44054	-76.6079	-3.06858	70.4707
7755.89	-9.73022	-76.8948	-3.47601	69.9428
7755.92	-10.0129	-77.1324	-3.85512	69.4221
7755.96	-10.2885	-77.3123	-4.2009	68.9105
7756	-10.5567	-77.4263	-4.50869	68.4089
7756.03	-10.8173	-77.4658	-4.77422	67.9174
7756.07	-11.0702	-77.4223	-4.99344	67.4354
7756.1	-11.3152	-77.2868	-5.16254	66.9617
7756.14	-11.5521	-77.0501	-5.27776	66.4945
7756.18	-11.7807	-76.7026	-5.3353	66.032
7756.21	-12.0009	-76.2345	-5.33119	65.5721
7756.25	-12.2125	-75.6357	-5.26113	65.1135
7756.28	-12.4154	-74.8958	-5.12037	64.6551
7756.32	-12.6093	-74.0045	-4.90354	64.1974
7756.36	-12.7943	-72.9515	-4.60458	63.7423
7756.39	-12.9701	-71.7269	-4.21664	63.2936
7756.43	-13.1366	-70.3217	-3.73197	62.8577
7756.46	-13.2937	-68.7279	-3.14198	62.4439
7756.5	-13.4413	-66.9391	-2.43722	62.0647
7756.54	-13.5793	-64.951	-1.60749	61.736
7756.57	-13.7075	-62.7616	-0.64196	61.4777
7756.61	-13.826	-60.372	0.470584	61.3132
7756.64	-13.9346	-57.7867	1.7415	61.2697
7756.68	-14.0332	-55.0133	3.18196	61.3773
7756.72	-14.1217	-52.0635	4.80255	61.6686
7756.75	-14.2001	-48.952	6.61282	62.1776
[truncated: 28,001 more rows]

## Sheet: HARPS_GP+planet_model_unphased
times	Planet model	GP lower 1-sig	GP median	GP upper 1-sig
2986.51	6.62961	48.3739	52.308	56.2421
2986.69	8.23119	8.61649	50.2379	91.8593
2986.86	9.69552	-32.8193	44.2934	121.406
2987.04	10.9982	-67.0837	36.2804	139.645
2987.21	12.1175	-91.9659	28.1356	148.237
2987.39	13.0346	-108.202	21.1605	150.522
2987.56	13.7345	-118.083	15.7935	149.67
2987.73	14.2053	-124.07	11.8516	147.774
2987.91	14.4391	-127.987	8.92936	145.846
2988.08	14.4322	-130.836	6.68806	144.212
2988.26	14.1847	-133.007	4.94615	142.899
2988.43	13.7005	-134.612	3.63034	141.873
2988.6	12.9879	-135.716	2.69751	141.111
2988.78	12.0587	-136.407	2.09498	140.597
2988.95	10.9284	-136.778	1.76286	140.304
2989.13	9.61587	-136.898	1.65331	140.205
2989.3	8.143	-136.796	1.74778	140.291
2989.47	6.53435	-136.443	2.06918	140.581
2989.65	4.81677	-135.742	2.6945	141.131
2989.82	3.01889	-134.487	3.77232	142.031
2990	1.17071	-132.294	5.54334	143.381
2990.17	-0.696941	-128.485	8.34886	145.182
2990.34	-2.55291	-121.918	12.5926	147.103
2990.52	-4.36625	-110.858	18.6058	148.07
2990.69	-6.10669	-93.0921	26.3869	145.866
2990.87	-7.74523	-66.6336	35.283	137.2
2991.04	-9.25451	-31.0933	43.8369	118.767
2991.22	-10.6094	10.7899	50.0756	89.3612
2991.39	-11.7872	42.1146	52.2896	62.4646
2991.56	-12.7684	4.32828	49.8988	95.4693
2991.74	-13.5365	-36.1575	43.7796	123.717
2991.91	-14.0788	-69.3875	35.7817	140.951
2992.09	-14.3862	-93.2514	27.8015	148.854
2992.26	-14.4535	-108.652	21.0512	150.754
2992.43	-14.2797	-117.967	15.8814	149.73
2992.61	-13.8677	-123.667	12.0574	147.782
2992.78	-13.2243	-127.526	9.16673	145.859
2992.96	-12.3602	-130.452	6.89615	144.245
2993.13	-11.29	-132.744	5.09958	142.943
2993.3	-10.0313	-134.454	3.731	141.916
2993.48	-8.60528	-135.627	2.75992	141.147
2993.65	-7.03565	-136.356	2.13491	140.625
2993.83	-5.34861	-136.743	1.79257	140.328
2994	-3.57229	-136.868	1.68149	140.23
2994.17	-1.73634	-136.76	1.78138	140.322
2994.35	0.128634	-136.392	2.11572	140.624
2994.52	1.99152	-135.664	2.76424	141.192
2994.7	3.82123	-134.36	3.8804	142.121
2994.87	5.58727	-132.081	5.71118	143.504
2995.04	7.26016	-128.124	8.60313	145.33
2995.22	8.812	-121.314	12.9583	147.231
2995.39	10.2169	-109.888	19.0903	148.069
2995.57	11.4514	-91.6507	26.9562	145.563
2995.74	12.495	-64.7522	35.8439	136.44
2995.92	13.3302	-29.1639	44.2459	117.656
2996.09	13.9432	11.279	50.1916	89.1042
2996.26	14.3235	32.9408	52.0491	71.1574
2996.44	14.4651	-1.29153	49.3645	100.021
2996.61	14.3654	-40.1036	43.1206	126.345
2996.79	14.0261	-71.9471	35.1959	142.339
2996.96	13.4529	-94.5989	27.431	149.461
2997.13	12.6554	-109.059	20.94	150.939
2997.31	11.6468	-117.763	15.9837	149.73
2997.48	10.444	-123.172	12.2793	147.731
2997.66	9.06708	-126.995	9.41372	145.822
2997.83	7.53895	-130.029	7.10568	144.24
2998	5.88512	-132.465	5.2485	142.962
2998.18	4.13318	-134.293	3.82447	141.942
2998.35	2.31235	-135.541	2.81482	141.171
2998.53	0.453001	-136.309	2.1681	140.645
2998.7	-1.41385	-136.714	1.81642	140.347
2998.87	-3.25706	-136.842	1.70428	140.251
2999.05	-5.04588	-136.729	1.80951	140.348
2999.22	-6.75048	-136.349	2.15597	140.661
2999.4	-8.34243	-135.595	2.82592	141.247
2999.57	-9.79517	-134.246	3.97716	142.2
2999.75	-11.0845	-131.889	5.86201	143.613
2999.92	-12.1888	-127.799	8.83053	145.46
3000.09	-13.0898	-120.778	13.2806	147.34
3000.27	-13.7724	-109.05	19.5056	148.061
3000.44	-14.2252	-90.4704	27.42	145.31
3000.62	-14.4406	-63.3826	36.2551	135.893
3000.79	-14.4152	-28.2493	44.4633	117.176
3000.96	-14.1492	9.50717	50.0899	90.6726
3001.14	-13.6471	23.4355	51.5927	79.75
3001.31	-12.9174	-7.80386	48.6465	105.097
3001.49	-11.9721	-44.5034	42.3311	129.166
3001.66	-10.8271	-74.6805	34.5373	143.755
3001.83	-9.50143	-95.9566	27.0361	150.029
3002.01	-8.01722	-109.388	20.835	151.058
3002.18	-6.39921	-117.444	16.1043	149.653
3002.36	-4.67442	-122.569	12.5175	147.604
3002.53	-2.87159	-126.386	9.66834	145.723
3002.7	-1.02081	-129.564	7.31371	144.192
3002.88	0.847045	-132.172	5.39004	142.952
3003.05	2.70083	-134.132	3.90846	141.949
3003.23	4.50962	-135.461	2.86063	141.182
3003.4	6.24324	-136.269	2.19352	140.656
3003.58	7.87278	-136.69	1.83373	140.358
3003.75	9.37105	-136.822	1.72122	140.265
3003.92	10.7131	-136.705	1.83174	140.369
3004.1	11.8764	-136.312	2.18945	140.691
3004.27	12.8417	-135.536	2.87888	141.294
3004.45	13.5929	-134.147	4.06161	142.27
3004.62	14.1174	-131.72	5.9942	143.709
3004.79	14.4064	-127.516	9.02851	145.573
3004.97	14.4552	-120.319	13.5559	147.431
3005.14	14.263	-108.36	19.8467	148.054
3005.32	13.8329	-89.578	27.7724	145.123
3005.49	13.1721	-62.5662	36.5119	135.59
3005.66	12.2916	-28.3943	44.4872	117.369
3005.84	11.2062	5.75153	49.7737	93.7959
3006.01	9.93385	13.8528	50.9299	88.007
3006.19	8.4959	-14.8624	47.7591	110.381
3006.36	6.91628	-49.2087	41.4272	132.063
3006.53	5.22135	-77.5059	33.8213	145.148
3006.71	3.43938	-97.2715	26.6286	150.529
3006.88	1.6001	-109.6	20.7436	151.087
3007.06	-0.26582	-116.984	16.2461	149.476
3007.23	-2.12725	-121.841	12.7713	147.384
3007.41	-3.95314	-125.694	9.92756	145.549
3007.58	-5.71304	-129.057	7.5165	144.09
3007.75	-7.37759	-131.865	5.52084	142.907
3007.93	-8.91902	-133.973	3.98042	141.933
3008.1	-10.3116	-135.386	2.89563	141.178
3008.28	-11.5322	-136.236	2.21009	140.656
3008.45	-12.5603	-136.673	1.84383	140.361
3008.62	-13.3789	-136.809	1.73184	140.272
3008.8	-13.9742	-136.687	1.84768	140.383
3008.97	-14.3364	-136.284	2.21574	140.715
3009.15	-14.4594	-135.487	2.92252	141.332
3009.32	-14.3412	-134.063	4.13281	142.329
3009.49	-13.9837	-131.578	6.10629	143.79
3009.67	-13.3928	-127.278	9.19482	145.668
3009.84	-12.5786	-119.944	13.7808	147.506
3010.02	-11.5544	-107.832	20.1095	148.051
3010.19	-10.3375	-88.9948	28.0093	145.013
3010.36	-8.94807	-62.3282	36.6115	135.551
3010.54	-7.40934	-29.5881	44.3185	118.225
3010.71	-5.74696	0.473108	49.2496	98.0261
3010.89	-3.98867	4.30314	50.0728	95.8424
3011.06	-2.16379	-22.2072	46.7187	115.645
3011.23	-0.30276	-54.0831	40.4266	134.936
3011.41	1.56337	-80.3436	33.0634	146.47
3011.58	3.40348	-98.4912	26.2201	150.931
3011.76	5.18687	-109.658	20.6722	151.002
3011.93	6.8838	-116.357	16.4105	149.178
3012.11	8.46596	-120.975	13.0385	147.052
3012.28	9.90695	-124.913	10.1872	145.287
3012.45	11.1828	-128.509	7.70954	143.928
3012.63	12.2721	-131.548	5.63702	142.822
3012.8	13.1567	-133.817	4.03753	141.892
3012.98	13.822	-135.32	2.91797	141.156
3013.15	14.2568	-136.211	2.21666	140.645
3013.32	14.4538	-136.664	1.846	140.356
3013.5	14.4097	-136.802	1.73567	140.273
3013.67	14.1254	-136.677	1.85698	140.391
3013.85	13.6055	-136.264	2.23445	140.732
3014.02	12.8587	-135.45	2.95633	141.362
3014.19	11.8975	-133.996	4.18997	142.376
3014.37	10.7378	-131.462	6.19704	143.856
3014.54	9.39915	-127.089	9.32756	145.744
3014.72	7.90373	-119.66	13.9527	147.565
3014.89	6.27653	-107.476	20.2908	148.058
3015.06	4.54469	-88.7344	28.1279	144.99
3015.24	2.7371	-62.6751	36.5531	135.781
3015.41	0.883908	-31.7653	43.9608	119.687
3015.59	-0.983977	-5.86537	48.5268	102.919
3015.76	-2.83539	-5.13054	49.0363	103.203
3015.94	-4.63946	-29.6434	45.5435	120.73
3016.11	-6.36608	-59.0045	39.3476	137.7
3016.28	-7.98646	-83.1183	32.2794	147.677
3016.46	-9.47357	-99.5641	25.8214	151.207
3016.63	-10.8026	-109.523	20.6259	150.775
3016.81	-11.9514	-115.537	16.5976	148.732
3016.98	-12.9008	-119.955	13.3156	146.586
3017.15	-13.6349	-124.039	10.4421	144.924
3017.33	-14.1415	-127.922	7.8875	143.697
3017.5	-14.4122	-131.225	5.73428	142.693
3017.68	-14.4425	-133.669	4.07676	141.822
3017.85	-14.2318	-135.265	2.92571	141.116
3018.02	-13.7836	-136.196	2.21206	140.62
3018.2	-13.1055	-136.662	1.83957	140.342
3018.37	-12.2087	-136.802	1.73229	140.267
3018.55	-11.1082	-136.673	1.8593	140.392
3018.72	-9.82233	-136.252	2.24526	140.742
3018.89	-8.3726	-135.424	2.97988	141.384
3019.07	-6.78315	-133.947	4.23243	142.412
3019.24	-5.08051	-131.376	6.26539	143.907
3019.42	-3.29306	-126.952	9.42516	145.802
3019.59	-1.45063	-119.471	14.0695	147.61
3019.77	0.416051	-107.299	20.3885	148.076
3019.94	2.27585	-88.803	28.127	145.057
3020.11	4.09773	-63.5942	36.3384	136.271
3020.29	5.85132	-34.8174	43.4203	121.658
3020.46	7.50737	-12.8851	47.6174	108.12
3020.64	9.03823	-14.376	47.8377	110.051
3020.81	10.4184	-37.0227	44.2533	125.529
3020.98	11.6248	-63.8656	38.2093	140.284
3021.16	12.6374	-85.7598	31.4842	148.728
3021.33	13.4392	-100.441	25.4418	151.324
3021.51	14.017	-109.16	20.6083	150.376
3021.68	14.3609	-114.499	16.8057	148.11
3021.85	14.4654	-118.772	13.5973	145.966
3022.03	14.3286	-123.073	10.6856	144.445
3022.2	13.9529	-127.301	8.04431	143.39
3022.38	13.3445	-130.9	5.80786	142.516
3022.55	12.5136	-133.531	4.09486	141.721
3022.72	11.474	-135.222	2.91682	141.055
3022.9	10.243	-136.192	2.19511	140.582
3023.07	8.84124	-136.67	1.82383	140.317
3023.25	7.29205	-136.81	1.72127	140.253
3023.42	5.62129	-136.677	1.85437	140.386
3023.59	3.85682	-136.249	2.24791	140.744
3023.77	2.02807	-135.41	2.99283	141.396
3023.94	0.16554	-133.916	4.25968	142.435
3024.12	-1.69969	-131.321	6.31054	143.942
3024.29	-3.53652	-126.869	9.48649	145.842
3024.47	-5.31431	-119.382	14.1299	147.642
3024.64	-7.00339	-107.305	20.4014	148.108
3024.81	-8.5756	-89.1982	28.007	145.212
3024.99	-10.0047	-65.0548	35.971	136.997
3025.16	-11.2669	-38.6084	42.7057	124.02
3025.34	-12.3411	-20.2997	46.5358	113.371
3025.51	-13.2093	-23.3678	46.4959	116.36
3025.68	-13.8572	-44.2294	42.8688	129.967
3025.86	-14.2739	-68.5737	37.0304	142.635
3026.03	-14.4524	-88.204	30.692	149.588
3026.21	-14.3899	-101.074	25.0894	151.252
3026.38	-14.0872	-108.532	20.6208	149.773
3026.55	-13.5495	-113.221	17.0311	147.283
3026.73	-12.7857	-117.417	13.877	145.17
3026.9	-11.8086	-122.018	10.9101	143.838
3027.08	-10.6345	-126.652	8.17317	142.998
3027.25	-9.2829	-130.579	5.85269	142.285
3027.42	-7.77643	-133.408	4.08848	141.585
3027.6	-6.1402	-135.194	2.88929	140.972
3027.77	-4.40149	-136.199	2.16464	140.529
3027.95	-2.58931	-136.686	1.79813	140.283
3028.12	-0.733881	-136.826	1.70223	140.23
3028.3	1.13384	-136.688	1.84192	140.372
3028.47	2.98271	-136.255	2.24217	140.739
3028.64	4.78187	-135.408	2.99492	141.398
3028.82	6.50133	-133.904	4.27134	142.446
3028.99	8.11239	-131.297	6.33196	143.961
3029.17	9.58819	-126.841	9.51081	145.862
3029.34	10.9041	-119.393	14.1331	147.66
3029.51	12.0382	-107.493	20.3297	148.152
3029.69	12.9715	-89.9095	27.7698	145.449
3029.86	13.6886	-67.0106	35.4567	137.924
3030.04	14.1773	-42.9903	41.8279	126.646
3030.21	14.4296	-27.8962	45.2986	118.493
3030.38	14.4413	-32.0471	45.0313	122.11
3030.56	14.2121	-51.1721	41.4111	133.994
3030.73	13.746	-73.0501	35.8293	144.709
3030.91	13.0506	-90.3929	29.9158	150.224
3031.08	12.1375	-101.419	24.7702	150.959
3031.25	11.0221	-107.606	20.663	148.932
3031.43	9.72286	-111.683	17.2683	146.219
3031.6	8.26149	-115.885	14.1461	144.178
3031.78	6.66237	-120.878	11.1069	143.092
3031.95	4.95217	-125.984	8.2667	142.518
3032.13	3.15943	-130.27	5.86343	141.997
3032.3	1.31403	-133.305	4.05417	141.413
3032.47	-0.553228	-135.183	2.84107	140.865
3032.65	-2.4112	-136.22	2.11951	140.459
3032.82	-4.22891	-136.713	1.76185	140.237
3033	-5.97602	-136.85	1.67482	140.199
3033.17	-7.62339	-136.708	1.82175	140.351
3033.34	-9.14355	-136.27	2.22791	140.725
3033.52	-10.5111	-135.419	2.98601	141.391
3033.69	-11.7033	-133.911	4.2672	142.445
3033.87	-12.7003	-131.305	6.32933	143.963
3034.04	-13.4853	-126.869	9.49783	145.864
3034.21	-14.0453	-119.505	14.0793	147.663
3034.39	-14.371	-107.859	20.1745	148.207
3034.56	-14.457	-90.9188	27.4191	145.757
3034.74	-14.3017	-69.403	34.8029	139.009
3034.91	-13.9078	-47.8162	40.8001	129.416
3035.08	-13.2819	-35.5143	43.9239	123.362
3035.26	-12.4343	-40.3613	43.4654	127.292
3035.43	-11.3793	-57.778	39.9014	137.581
3035.61	-10.1345	-77.2282	34.6234	146.475
3035.78	-8.72053	-92.2753	29.1666	150.609
3035.95	-7.16105	-101.435	24.4882	150.412
3036.13	-5.48207	-106.351	20.7321	147.816
3036.3	-3.7116	-109.87	17.5095	144.889
3036.48	-1.87915	-114.179	14.3946	142.968
3036.65	-0.015311	-119.665	11.2662	142.197
3036.83	1.84884	-125.309	8.31701	141.943
3037	3.68221	-129.981	5.83458	141.65
3037.17	5.4542	-133.226	3.98854	141.203
3037.35	7.13528	-135.192	2.77022	140.733
3037.52	8.69739	-136.256	2.05864	140.373
3037.7	10.1145	-136.751	1.71441	140.179
3037.87	11.3629	-136.882	1.63876	140.16
3038.04	12.4218	-136.735	1.79371	140.323
3038.22	13.2736	-136.294	2.20504	140.704
3038.39	13.9041	-135.442	2.96603	141.374
3038.57	14.3026	-133.936	4.24722	142.431
3038.74	14.4627	-131.344	6.30265	143.949
3038.91	14.3815	-126.952	9.4477	145.847
3039.09	14.0606	-119.714	13.9691	147.653
3039.26	13.5051	-108.395	19.9378	148.27
3039.44	12.7244	-92.2015	26.9599	146.121
3039.61	11.7315	-72.165	34.0193	140.204
3039.78	10.543	-52.9478	39.6369	132.222
3039.96	9.17871	-43.0313	42.4313	127.894
3040.13	7.66135	-48.265	41.8199	131.905
3040.31	6.01624	-63.9896	38.3602	140.71
3040.48	4.27083	-81.0533	33.4287	147.911
3040.66	2.45423	-93.8066	28.4537	150.714
3040.83	0.596756	-101.087	24.245	149.577
3041	-1.27062	-104.742	20.823	146.388
3041.18	-3.11675	-107.771	17.745	143.261
3041.35	-4.91084	-112.303	14.6112	141.526
3041.53	-6.62296	-118.393	11.3773	141.147
3041.7	-8.22455	-124.639	8.31587	141.271
3041.87	-9.68889	-129.721	5.76062	141.242
3042.05	-10.9916	-133.175	3.88826	140.952
3042.22	-12.1109	-135.224	2.67489	140.574
3042.4	-13.0281	-136.307	1.98107	140.27
3042.57	-13.7279	-136.799	1.6553	140.11
3042.74	-14.1987	-136.923	1.59377	140.111
3042.92	-14.4326	-136.771	1.7577	140.286
3043.09	-14.4257	-136.327	2.17355	140.674
3043.27	-14.1782	-135.477	2.93505	141.347
3043.44	-13.694	-133.981	4.2115	142.404
3043.61	-12.9814	-131.414	6.25215	143.918
3043.79	-12.0523	-127.089	9.361	145.81
3043.96	-10.922	-120.018	13.804	147.626
3044.14	-9.60947	-109.089	19.623	148.335
3044.31	-8.13661	-93.7274	26.3984	146.524
3044.49	-6.52797	-75.2253	33.1166	141.458
3044.66	-4.81039	-58.2608	38.3544	134.97
3044.83	-3.01252	-50.3518	40.841	132.034
3045.01	-1.16435	-55.7201	40.1166	135.953
3045.18	0.703305	-69.7618	36.8072	143.376
3045.36	2.55928	-84.4811	32.2593	149
3045.53	4.37262	-94.9486	27.7837	150.516
3045.7	6.11307	-100.34	24.0395	148.42
3045.88	7.75161	-102.755	20.9279	144.611
3046.05	9.2609	-105.381	17.963	141.307
3046.23	10.6158	-110.271	14.7829	139.836
3046.4	11.7936	-117.08	11.429	139.938
3046.57	12.7748	-123.991	8.25492	140.501
3046.75	13.5429	-129.498	5.63615	140.771
3046.92	14.0852	-133.159	3.75022	140.66
3047.1	14.3926	-135.281	2.55341	140.387
3047.27	14.46	-136.376	1.88595	140.148
3047.44	14.2863	-136.86	1.58412	140.028
3047.62	13.8742	-136.974	1.5397	140.053
3047.79	13.2309	-136.814	1.71367	140.242
3047.97	12.3668	-136.369	2.13348	140.636
3048.14	11.2966	-135.524	2.89319	141.31
3048.31	10.0379	-134.043	4.16031	142.364
3048.49	8.6119	-131.514	6.17833	143.871
3048.66	7.04228	-127.277	9.23872	145.754
3048.84	5.35525	-120.41	13.586	147.582
3049.01	3.57894	-109.929	19.2341	148.397
3049.19	1.74299	-95.4621	25.7423	146.947
3049.36	-0.121984	-78.5116	32.107	142.726
3049.53	-1.98487	-63.6462	36.9698	137.586
3049.71	-3.81459	-57.4012	39.1738	135.749
3049.88	-5.58063	-62.6957	38.3768	139.449
3050.06	-7.25353	-75.061	35.2605	145.582
3050.23	-8.80538	-87.4772	31.1273	149.732
3050.4	-10.2103	-95.67	27.1608	149.992
3050.58	-11.4449	-99.1696	23.868	146.906
3050.75	-12.4885	-100.375	21.0368	142.448
3050.93	-13.3237	-102.702	18.1498	139.002
3051.1	-13.9366	-108.101	14.8958	137.892
3051.27	-14.317	-115.75	11.4095	138.569
3051.45	-14.4586	-123.381	8.12583	139.633
3051.62	-14.3589	-129.324	5.45603	140.236
3051.8	-14.0196	-133.182	3.57156	140.325
3051.97	-13.4465	-135.364	2.40435	140.173
3052.14	-12.649	-136.462	1.77258	140.008
3052.32	-11.6404	-136.933	1.50055	139.934
3052.49	-10.4376	-137.033	1.47641	139.986
3052.67	-9.0607	-136.866	1.66163	140.189
3052.84	-7.53258	-136.42	2.08496	140.59
3053.02	-5.87876	-135.583	2.84069	141.264
3053.19	-4.12682	-134.124	4.09407	142.312
3053.36	-2.306	-131.643	6.08192	143.807
3053.54	-0.446656	-127.514	9.08227	145.678
3053.71	1.42019	-120.884	13.3178	147.52
3053.89	3.2634	-110.896	18.7762	148.449
3054.06	5.05223	-97.3691	25.0001	147.369
3054.23	6.75684	-81.9537	31.0038	143.961
3054.41	8.3488	-69.0108	35.5007	140.012
3054.58	9.80155	-64.1216	37.4502	139.022
3054.76	11.0909	-69.169	36.6208	142.411
3054.93	12.1952	-79.8634	33.7364	147.336
3055.1	13.0962	-90.0159	30.0421	150.1
3055.28	13.7788	-95.9462	26.5864	149.119
3055.45	14.2316	-97.5527	23.7238	145
3055.63	14.4471	-97.5896	21.1371	139.864
3055.8	14.4217	-99.7459	18.29	136.326
3055.97	14.1557	-105.82	14.9351	135.69
3056.15	13.6537	-114.43	11.3071	137.044
3056.32	12.9239	-122.829	7.92054	138.67
3056.5	11.9787	-129.207	5.21552	139.638
3056.67	10.8337	-133.248	3.34985	139.948
3056.85	9.50803	-135.477	2.22655	139.93
3057.02	8.02382	-136.568	1.64046	139.849
3057.19	6.40583	-137.018	1.4044	139.827
3057.37	4.68104	-137.102	1.40388	139.909
3057.54	2.87822	-136.926	1.60166	140.129
3057.72	1.02744	-136.479	2.02818	140.536
3057.89	-0.840416	-135.653	2.77789	141.208
3058.06	-2.6942	-134.22	4.01333	142.247
3058.24	-4.503	-131.799	5.96391	143.726
3058.41	-6.23663	-127.796	8.89342	145.583
3058.59	-7.86617	-121.431	13.0027	147.437
3058.76	-9.36445	-111.974	18.255	148.484
3058.93	-10.7065	-99.4103	24.1812	147.773
3059.11	-11.8699	-85.4855	29.8208	145.127
3059.28	-12.8352	-74.2766	33.9653	142.207
3059.46	-13.5864	-70.4687	35.6903	141.849
3059.63	-14.1109	-75.1246	34.8673	144.859
3059.8	-14.4	-84.1544	32.2491	148.653
3059.98	-14.4488	-92.0804	29.0105	150.101
3060.15	-14.2565	-95.7595	26.0588	147.877
3060.33	-13.8264	-95.4746	23.5977	142.67
3060.5	-13.1656	-94.3969	21.2141	136.825
3060.68	-12.2852	-96.5303	18.3669	133.264
3060.85	-11.1998	-103.463	14.8853	133.233
3061.02	-9.92748	-113.151	11.1099	135.371
3061.2	-8.48954	-122.352	7.63151	137.615
3061.37	-6.90993	-129.158	4.91049	138.979
3061.55	-5.21502	-133.361	3.08313	139.527
3061.72	-3.43305	-135.62	2.01921	139.658
3061.89	-1.59377	-136.692	1.48932	139.671
3062.07	0.272145	-137.116	1.29561	139.707
3062.24	2.13358	-137.179	1.32216	139.824
3062.42	3.95947	-136.993	1.5339	140.061
3062.59	5.71938	-136.547	1.96336	140.474
3062.76	7.38394	-135.733	2.70519	141.143
3062.94	8.92538	-134.333	3.91877	142.17
3063.11	10.318	-131.979	5.82548	143.63
3063.29	11.5386	-128.119	8.67427	145.467
3063.46	12.5667	-122.042	12.6444	147.331
3063.63	13.3853	-113.142	17.6768	148.495
3063.81	13.9806	-101.548	23.2957	148.14
3063.98	14.3429	-89.0467	28.5724	146.192
3064.16	14.4659	-79.3796	32.3814	144.142
3064.33	14.3477	-76.4106	33.9134	144.237
3064.5	13.9902	-80.5545	33.1335	146.822
3064.68	13.3994	-87.9277	30.8101	149.548
3064.85	12.5851	-93.6617	28.0366	149.735
3065.03	11.561	-95.0997	25.5735	146.247
3065.2	10.3441	-92.9271	23.4777	139.883
3065.38	8.95465	-90.8015	21.251	133.303
3065.55	7.41593	-93.0847	18.3625	129.81
3065.72	5.75356	-101.071	14.7309	130.533
3065.9	3.99527	-111.947	10.8067	133.561
3066.07	2.1704	-121.97	7.25196	136.473
3066.25	0.309371	-129.183	4.53753	138.258
3066.42	-1.55676	-133.524	2.77	139.064
3066.59	-3.39688	-135.794	1.78191	139.358
3066.77	-5.18027	-136.836	1.31911	139.474
3066.94	-6.87721	-137.226	1.17427	139.574
3067.12	-8.45938	-137.266	1.2314	139.729
3067.29	-9.90039	-137.068	1.45855	139.985
3067.46	-11.1762	-136.623	1.89084	140.404
3067.64	-12.2655	-135.823	2.62308	141.069
3067.81	-13.1502	-134.46	3.81121	142.082
3067.99	-13.8155	-132.183	5.66801	143.519
3068.16	-14.2503	-128.477	8.4272	145.332
3068.33	-14.4473	-122.708	12.247	147.202
3068.51	-14.4033	-114.381	17.0484	148.478
3068.68	-14.119	-103.747	22.3541	148.455
3068.86	-13.5991	-92.5839	27.273	147.13
3069.03	-12.8523	-84.2691	30.7665	145.802
3069.21	-11.8911	-81.9256	32.1374	146.2
3069.38	-10.7315	-85.4582	31.4344	148.327
3069.55	-9.39281	-91.1847	29.4286	150.042
3069.73	-7.8974	-94.7588	27.1211	149.001
3069.9	-6.27021	-93.9639	25.1232	144.21
3070.08	-4.53838	-89.9099	23.3494	136.609
3070.25	-2.73079	-86.8175	21.2294	129.276
3070.42	-0.877601	-89.4485	18.2584	125.965
3070.6	0.990283	-98.6944	14.4567	127.608
3070.77	2.8417	-110.853	10.3873	131.627
3070.95	4.64577	-121.699	6.77613	135.251
3071.12	6.3724	-129.29	4.09414	137.478
3071.29	7.99279	-133.74	2.40974	138.559
3071.47	9.47991	-136	1.51466	139.029
3071.64	10.809	-136.999	1.13006	139.259
3071.82	11.9578	-137.349	1.04063	139.43
3071.99	12.9071	-137.362	1.13184	139.625
3072.16	13.6413	-137.151	1.37589	139.902
3072.34	14.148	-136.706	1.81097	140.327
3072.51	14.4187	-135.923	2.53212	140.987
3072.69	14.4489	-134.599	3.69155	141.983
3072.86	14.2382	-132.406	5.49302	143.392
3073.04	13.7901	-128.867	8.15484	145.177
3073.21	13.112	-123.419	11.8149	147.048
3073.38	12.2152	-115.671	16.3771	148.425
3073.56	11.1147	-105.972	21.367	148.706
3073.73	9.82889	-96.051	25.9369	147.925
3073.91	8.37916	-88.9058	29.137	147.18
3074.08	6.78973	-87.0018	30.3784	147.759
3074.25	5.08709	-89.8419	29.7827	149.407
3074.43	3.29965	-93.9343	28.1105	150.155
3074.6	1.45722	-95.3785	26.2621	147.903
3074.78	-0.409459	-92.3577	24.6975	141.753
3074.95	-2.26926	-86.4312	23.1962	132.824
3075.12	-4.09115	-82.4687	21.1296	124.728
3075.3	-5.84475	-85.6726	18.0359	121.744
3075.47	-7.5008	-96.3871	14.048	124.483
3075.65	-9.03168	-109.903	9.84222	129.587
3075.82	-10.4119	-121.556	6.19951	133.955
3075.99	-11.6183	-129.484	3.57885	136.642
3076.17	-12.6309	-134.009	2.00237	138.013
3076.34	-13.4328	-136.237	1.21797	138.673
3076.52	-14.0105	-137.181	0.922696	139.027
3076.69	-14.3545	-137.484	0.895119	139.274
3076.86	-14.459	-137.466	1.02383	139.513
3077.04	-14.3222	-137.24	1.28627	139.812
3077.21	-13.9465	-136.795	1.72419	140.244
3077.39	-13.3381	-136.031	2.43294	140.896
3077.56	-12.5072	-134.751	3.5608	141.873
3077.74	-11.4676	-132.647	5.30218	143.252
3077.91	-10.2367	-129.283	7.86002	145.003
3078.08	-8.83492	-124.163	11.3529	146.869
3078.26	-7.28575	-116.993	15.6703	148.334
3078.43	-5.61499	-108.192	20.3452	148.883
3078.61	-3.85053	-99.4095	24.5779	148.565
3078.78	-2.02178	-93.2615	27.5086	148.279
3078.95	-0.159254	-91.6356	28.6509	148.937
3079.13	1.70598	-93.7181	28.1885	150.095
3079.3	3.54281	-96.1921	26.8592	149.91
3079.48	5.3206	-95.5353	25.4546	146.445
3079.65	7.00969	-90.2953	24.2837	138.863
3079.82	8.58191	-82.5082	22.9996	128.507
3080	10.011	-77.789	20.9312	119.651
3080.17	11.2732	-81.8186	17.6766	117.172
3080.35	12.3474	-94.2087	13.4915	121.192
3080.52	13.2157	-109.13	9.16397	127.458
3080.69	13.8636	-121.553	5.51905	132.591
3080.87	14.2803	-129.768	2.99135	135.751
3081.04	14.4589	-134.33	1.54868	137.428
3081.22	14.3963	-136.506	0.892798	138.291
3081.39	14.0936	-137.382	0.697822	138.777
3081.57	13.556	-137.63	0.738318	139.107
3081.74	12.7922	-137.578	0.907819	139.393
3081.91	11.8151	-137.336	1.1901	139.716
3082.09	10.641	-136.892	1.63097	140.154
3082.26	9.28944	-136.146	2.32621	140.798
3082.44	7.78299	-134.913	3.42001	141.753
3082.61	6.14676	-132.903	5.09726	143.098
3082.78	4.40806	-129.719	7.54567	144.811
3082.96	2.59588	-124.932	10.8657	146.663
3083.13	0.740454	-118.33	14.9353	148.2
3083.31	-1.12727	-110.381	19.2992	148.98
3083.48	-2.97614	-102.628	23.2092	149.047
3083.65	-4.77531	-97.3174	25.8953	149.108
3083.83	-6.49477	-95.8308	26.9673	149.765
3084	-8.10585	-97.1055	26.6593	150.424
3084.18	-9.58166	-97.9801	25.675	149.33
3084.35	-10.8976	-95.2516	24.6909	144.633
3084.52	-12.0317	-87.8004	23.8667	135.534
3084.7	-12.9651	-78.1678	22.7398	123.647
3084.87	-13.6821	-72.8234	20.6135	114.05
3085.05	-14.1709	-77.9596	17.1628	112.285
3085.22	-14.4232	-92.2207	12.7754	117.772
3085.4	-14.4349	-108.564	8.34674	125.258
3085.57	-14.2058	-121.698	4.73338	131.165
3085.74	-13.7396	-130.142	2.33259	134.807
3085.92	-13.0442	-134.704	1.05031	136.804
3086.09	-12.1312	-136.803	0.540662	137.885
3086.27	-11.0158	-137.599	0.456552	138.512
3086.44	-9.71655	-137.787	0.571004	138.929
3086.61	-8.25519	-137.697	0.784366	139.266
3086.79	-6.65608	-137.438	1.08785	139.613
3086.96	-4.9459	-136.994	1.53185	140.057
3087.14	-3.15315	-136.268	2.21268	140.693
3087.31	-1.30776	-135.084	3.27032	141.624
3087.48	0.559495	-133.171	4.88011	142.931
3087.66	2.41747	-130.171	7.21485	144.601
3087.83	4.23518	-125.716	10.3582	146.432
3088.01	5.9823	-119.665	14.1795	148.024
3088.18	7.62968	-112.515	18.239	148.993
3088.35	9.14984	-105.684	21.8429	149.369
3088.53	10.5174	-101.063	24.3096	149.682
3088.7	11.7097	-99.5981	25.3376	150.273
3088.88	12.7066	-100.028	25.1999	150.428
3089.05	13.4916	-99.3267	24.5553	148.437
3089.22	14.0517	-94.5581	23.9606	142.479
3089.4	14.3774	-84.907	23.4296	131.766
3089.57	14.4634	-73.4472	22.3961	118.239
3089.75	14.3081	-67.6275	20.1561	107.94
3089.92	13.9142	-74.1789	16.4787	107.136
3090.1	13.2883	-90.4839	11.8901	114.264
3090.27	12.4408	-108.229	7.38692	123.002
3090.44	11.3858	-121.996	3.84299	129.682
3090.62	10.141	-130.604	1.60484	133.813
3090.79	8.72705	-135.126	0.509769	136.145
3090.97	7.16759	-137.128	0.16357	137.455
3091.14	5.48862	-137.833	0.200301	138.233
3091.31	3.71814	-137.954	0.394122	138.743
3091.49	1.8857	-137.823	0.654135	139.132
3091.66	0.0218643	-137.545	0.980074	139.505
3091.84	-1.84229	-137.101	1.42741	139.956
3092.01	-3.67566	-136.396	2.09309	140.582
3092.18	-5.44766	-135.262	3.1129	141.488
3092.36	-7.12875	-133.449	4.65259	142.754
3092.53	-8.69086	-130.634	6.87059	144.375
3092.71	-10.108	-126.505	9.83532	146.176
3092.88	-11.3564	-120.984	13.41	147.804
3093.05	-12.4154	-114.575	17.1742	148.923
3093.23	-13.2672	-108.558	20.4901	149.539
3093.4	-13.8976	-104.496	22.7623	150.02
3093.58	-14.2962	-102.954	23.7696	150.493
3093.75	-14.4563	-102.515	23.8124	150.14
3093.93	-14.3752	-100.266	23.4953	147.257
3094.1	-14.0542	-93.4938	23.2513	139.996
3094.27	-13.4987	-81.6599	22.9539	127.568
3094.45	-12.7181	-68.394	21.9474	112.289
3094.62	-11.7252	-62.2683	19.5396	101.348
3094.8	-10.5367	-70.5683	15.61	101.788
3094.97	-9.17243	-89.0545	10.8283	110.711
3095.14	-7.65507	-108.14	6.28339	120.706
3095.32	-6.00997	-122.445	2.85032	128.145
3095.49	-4.26457	-131.149	0.811731	132.772
3095.67	-2.44798	-135.592	-0.0696047	135.453
3095.84	-0.590508	-137.477	-0.235958	137.005
3096.01	1.27687	-138.08	-0.0692283	137.941
3096.19	3.123	-138.13	0.208787	138.548
3096.36	4.91709	-137.956	0.51789	138.992
3096.54	6.62922	-137.657	0.867385	139.392
3096.71	8.23082	-137.213	1.31826	139.849
3096.88	9.69518	-136.529	1.96825	140.465
3097.06	10.9979	-135.446	2.94892	141.344
3097.23	12.1172	-133.733	4.41661	142.566
3097.41	13.0344	-131.103	6.51595	144.134
3097.58	13.7343	-127.292	9.30165	145.896
3097.76	14.2051	-122.273	12.6336	147.541
3097.93	14.439	-116.545	16.1135	148.772
3098.1	14.4321	-111.241	19.1608	149.563
3098.28	14.1846	-107.619	21.2623	150.143
3098.45	13.7005	-105.92	22.2687	150.457
3098.63	12.9879	-104.599	22.4965	149.592
3098.8	12.0587	-100.839	22.4872	145.813
3098.97	10.9285	-92.1067	22.5485	137.204
3099.15	9.61597	-78.1161	22.4203	122.957
3099.32	8.14312	-63.0667	21.3729	105.813
3099.5	6.53449	-56.8238	18.7462	94.3163
3099.67	4.81692	-67.2264	14.5454	96.3172
3099.84	3.01905	-87.9805	9.58591	107.152
3100.02	1.17088	-108.305	5.03766	118.38
3100.19	-0.696771	-123.039	1.75986	126.558
3100.37	-2.55275	-131.77	-0.0417202	131.686
3100.54	-4.36609	-136.097	-0.683621	134.73
3100.71	-6.10655	-137.846	-0.654922	136.536
3100.89	-7.7451	-138.339	-0.350055	137.639
3101.06	-9.25441	-138.313	0.0162734	138.346
3101.24	-10.6093	-138.094	0.376492	138.847
3101.41	-11.7872	-137.773	0.75045	139.274
3101.58	-12.7683	-137.328	1.20506	139.738
3101.76	-13.5365	-136.666	1.83897	140.344
3101.93	-14.0788	-135.634	2.77959	141.193
3102.11	-14.3862	-134.022	4.17404	142.37
3102.28	-14.4536	-131.573	6.1539	143.881
3102.46	-14.2799	-128.07	8.76174	145.594
3102.63	-13.8679	-123.524	11.8567	147.237
3102.8	-13.2245	-118.413	15.0651	148.543
3102.98	-12.3605	-113.728	17.8635	149.455
3103.15	-11.2903	-110.441	19.8167	150.075
3103.33	-10.0317	-108.521	20.838	150.197
3103.5	-8.60564	-106.317	21.2494	148.816
3103.67	-7.03603	-101.09	21.5215	144.133
3103.85	-5.34901	-90.4533	21.8365	134.126
3104.02	-3.57271	-74.3447	21.809	117.963
3104.2	-1.73676	-57.5344	20.6529	98.8402
3104.37	0.128214	-51.3829	17.7603	86.9036
3104.54	1.9911	-64.2537	13.2763	90.8064
3104.72	3.82082	-87.2975	8.16199	103.622
3104.89	5.58687	-108.721	3.6541	116.029
3105.07	7.25978	-123.766	0.578152	124.923
3105.24	8.81164	-132.457	-0.949168	130.559
3105.41	10.2166	-136.635	-1.3273	133.98
3105.59	11.4511	-138.233	-1.08988	136.053
3105.76	12.4948	-138.607	-0.639952	137.327
3105.94	13.33	-138.502	-0.181999	138.138
3106.11	13.9429	-138.235	0.230886	138.697
3106.29	14.3234	-137.893	0.629989	139.153
3106.46	14.4649	-137.447	1.0885	139.624
3106.63	14.3653	-136.806	1.70608	140.218
3106.81	14.026	-135.826	2.60609	141.038
3106.98	13.4529	-134.313	3.92671	142.166
3107.16	12.6554	-132.041	5.78728	143.615
3107.33	11.6469	-128.833	8.21987	145.272
3107.5	10.4441	-124.727	11.0852	146.897
3107.68	9.06718	-120.173	14.0358	148.245
3107.85	7.53907	-116.016	16.6051	149.226
3108.03	5.88526	-112.977	18.4306	149.839
3108.2	4.13333	-110.787	19.4785	149.744
3108.37	2.31251	-107.711	20.0662	147.843
3108.55	0.453171	-101.069	20.587	142.243
3108.72	-1.41368	-88.5993	21.0983	130.796
3108.9	-3.25689	-70.4286	21.1005	112.63
3109.07	-5.04573	-51.8776	19.7691	91.4157
3109.24	-6.75035	-46.0451	16.5691	79.1834
3109.42	-8.34232	-61.7476	11.798	85.3436
3109.59	-9.79508	-87.0254	6.5591	100.144
3109.77	-11.0844	-109.375	2.13993	113.655
3109.94	-12.1888	-124.612	-0.686195	123.24
3110.12	-13.0898	-133.2	-1.903	129.394
3110.29	-13.7724	-137.199	-1.99495	133.209
3110.46	-14.2252	-138.632	-1.53698	135.558
3110.64	-14.4407	-138.883	-0.936469	137.01
3110.81	-14.4153	-138.695	-0.384485	137.927
3110.99	-14.1494	-138.381	0.0820978	138.545
3111.16	-13.6474	-138.016	0.506772	139.029
3111.33	-12.9176	-137.568	0.969285	139.507
3111.51	-11.9724	-136.948	1.57043	140.089
3111.68	-10.8274	-136.019	2.42959	140.878
3111.86	-9.50178	-134.604	3.6764	141.956
3112.03	-8.01759	-132.503	5.4188	143.341
3112.2	-6.3996	-129.574	7.67997	144.934
3112.38	-4.67482	-125.875	10.3242	146.523
3112.55	-2.87201	-121.819	13.0318	147.883
3112.73	-1.02123	-118.111	15.3914	148.893
3112.9	0.846626	-115.244	17.1072	149.458
3113.07	2.70042	-112.749	18.1891	149.128
3113.25	4.50921	-108.823	18.9399	146.703
3113.42	6.24285	-100.833	19.6708	140.175
3113.6	7.8724	-86.6187	20.3168	127.252
3113.77	9.3707	-66.4644	20.2761	107.016
3113.95	10.7127	-46.1875	18.7055	83.5984
3114.12	11.8761	-40.9211	15.1633	71.2477
3114.29	12.8415	-59.7947	10.1095	80.0136
3114.47	13.5927	-87.1654	4.78351	96.7324
3114.64	14.1172	-110.246	0.505317	111.257
3114.82	14.4063	-125.556	-2.02264	121.511
3114.99	14.4551	-133.984	-2.89445	128.195
3115.16	14.2629	-137.781	-2.68025	132.42
3115.34	13.8328	-139.039	-1.99206	135.055
3115.51	13.1721	-139.162	-1.23698	136.688
3115.69	12.2916	-138.892	-0.589534	137.713
3115.86	11.2062	-138.528	-0.0687851	138.39
3116.03	9.93394	-138.14	0.381606	138.903
3116.21	8.49601	-137.691	0.848148	139.387
3116.38	6.91641	-137.091	1.43282	139.957
3116.56	5.2215	-136.213	2.25122	140.715
3116.73	3.43955	-134.892	3.42478	141.742
3116.9	1.60027	-132.956	5.05099	143.058
3117.08	-0.265649	-130.29	7.14564	144.581
3117.25	-2.12708	-126.965	9.57847	146.122
3117.43	-3.95299	-123.35	12.0582	147.467
3117.6	-5.7129	-120.018	14.2266	148.471
3117.77	-7.37746	-117.262	15.8481	148.958
3117.95	-8.91892	-114.441	16.9669	148.375
3118.12	-10.3115	-109.698	17.8624	145.423
3118.3	-11.5321	-100.44	18.7593	137.959
3118.47	-12.5603	-84.5939	19.475	123.544
3118.65	-13.3789	-62.563	19.3185	101.2
3118.82	-13.9743	-40.5678	17.4489	75.4656
3118.99	-14.3365	-36.1325	13.5374	63.2073
3119.17	-14.4595	-58.4618	8.21409	74.8899
3119.34	-14.3413	-87.6989	2.84529	93.3894
3119.52	-13.9839	-111.302	-1.23678	108.829
3119.69	-13.3931	-126.577	-3.41882	119.739
3119.86	-12.5788	-134.798	-3.91373	126.971
3120.04	-11.5547	-138.373	-3.37634	131.621
3120.21	-10.3378	-139.45	-2.45069	134.548
3120.39	-8.94843	-139.443	-1.53872	136.366
3120.56	-7.40972	-139.089	-0.795416	137.498
3120.73	-5.74736	-138.676	-0.220624	138.235
3120.91	-3.98908	-138.265	0.25533	138.776
3121.08	-2.1642	-137.815	0.725833	139.266
3121.26	-0.30318	-137.235	1.2941	139.824
3121.43	1.56295	-136.406	2.07207	140.55
3121.6	3.40307	-135.178	3.17345	141.524
3121.78	5.18647	-133.399	4.68616	142.771
3121.95	6.88342	-130.978	6.62009	144.218
3122.13	8.46559	-127.993	8.85188	145.697
3122.3	9.90661	-124.768	11.119	147.006
3122.48	11.1824	-121.748	13.1134	147.975
3122.65	12.2718	-119.052	14.6531	148.358
3122.82	13.1565	-115.898	15.8074	147.513
3123	13.8218	-110.382	16.824	144.03
3123.17	14.2566	-99.953	17.8386	135.63
3123.35	14.4536	-82.6133	18.5564	119.726
3123.52	14.4096	-58.8497	18.2126	95.2749
3123.69	14.1253	-35.1356	15.9897	67.115
3123.87	13.6055	-31.8132	11.6903	55.1937
3124.04	12.8587	-57.7863	6.11955	70.0254
3124.22	11.8975	-88.5882	0.758227	90.1047
3124.39	10.7379	-112.507	-3.07073	106.366
3124.56	9.39925	-127.65	-4.86079	117.928
3124.74	7.90386	-135.628	-4.95022	125.727
3124.91	6.27668	-138.969	-4.07599	130.817
3125.09	4.54485	-139.86	-2.90825	134.043
3125.26	2.73727	-139.723	-1.83884	136.045
3125.43	0.884078	-139.285	-1.00035	137.284
3125.61	-0.983806	-138.824	-0.372247	138.08
3125.78	-2.83523	-138.391	0.128804	138.649
3125.96	-4.6393	-137.939	0.603089	139.145
3126.13	-6.36594	-137.379	1.15507	139.689
3126.31	-7.98634	-136.597	1.89318	140.384
3126.48	-9.47347	-135.457	2.92387	141.305
3126.65	-10.8025	-133.827	4.32641	142.48
3126.83	-11.9513	-131.635	6.10611	143.847
3127	-12.9008	-128.958	8.14773	145.253
3127.18	-13.6349	-126.074	10.2172	146.508
3127.35	-14.1416	-123.312	12.0534	147.419
3127.52	-14.4123	-120.639	13.5208	147.681
3127.7	-14.4426	-117.155	14.7047	146.565
3127.87	-14.2319	-110.924	15.8143	142.552
3128.05	-13.7838	-99.4346	16.8946	133.224
3128.22	-13.1057	-80.7701	17.5458	115.862
3128.39	-12.2089	-55.4621	16.9458	89.3538
3128.57	-11.1085	-30.0256	14.3221	58.6698
3128.74	-9.82267	-28.1102	9.62546	47.3611
3128.92	-8.37296	-57.7682	3.83812	65.4444
3129.09	-6.78354	-89.7794	-1.46026	86.8589
3129.26	-5.08091	-113.819	-4.97848	103.862
3129.44	-3.29347	-128.752	-6.33324	116.086
3129.61	-1.45105	-136.46	-5.99267	124.474
3129.79	0.415631	-139.559	-4.7717	130.016
3129.96	2.27543	-140.264	-3.36006	133.544
3130.13	4.09733	-139.998	-2.13445	135.73
3130.31	5.85093	-139.479	-1.20254	137.074
3130.48	7.50699	-138.971	-0.522464	137.926
3130.66	9.03788	-138.516	0.00289827	138.522
3130.83	10.4181	-138.062	0.480665	139.024
3131.01	11.6245	-137.522	1.01652	139.555
3131.18	12.6371	-136.786	1.71554	140.217
3131.35	13.439	-135.731	2.67739	141.086
3131.53	14.0168	-134.241	3.9736	142.188
3131.7	14.3608	-132.259	5.6061	143.471
3131.88	14.4653	-129.861	7.46865	144.798
3132.05	14.3286	-127.274	9.35497	145.984
3132.22	13.9529	-124.724	11.0468	146.818
3132.4	13.3445	-122.047	12.4484	146.944
3132.57	12.5136	-118.247	13.6522	145.552
3132.75	11.474	-111.369	14.8225	141.014
3132.92	10.2431	-98.9494	15.9139	130.777
3133.09	8.84135	-79.1588	16.4299	112.019
3133.27	7.29219	-52.5472	15.5089	83.5649
3133.44	5.62144	-25.3976	12.4446	50.2868
3133.62	3.85698	-25.183	7.35131	39.8856
3133.79	2.02824	-58.3658	1.38648	61.1388
3133.96	0.165711	-91.2057	-3.78939	83.6269
3134.14	-1.69952	-115.196	-6.93991	101.317
3134.31	-3.53636	-129.861	-7.81983	114.221
3134.49	-5.31416	-137.283	-7.02943	123.224
3134.66	-7.00326	-140.139	-5.45589	129.227
3134.84	-8.57549	-140.659	-3.80141	133.057
3135.01	-10.0046	-140.267	-2.4227	135.422
3135.18	-11.2668	-139.669	-1.40019	136.868
3135.36	-12.341	-139.116	-0.670091	137.775
3135.53	-13.2094	-138.64	-0.121518	138.397
3135.71	-13.8573	-138.185	0.359301	138.903
3135.88	-14.274	-137.663	0.879197	139.422
3136.05	-14.4526	-136.972	1.54006	140.052
3136.23	-14.39	-135.997	2.43523	140.867
3136.4	-14.0874	-134.638	3.62934	141.897
3136.58	-13.5497	-132.85	5.12201	143.094
3136.75	-12.786	-130.701	6.8166	144.335
3136.92	-11.8089	-128.373	8.5334	145.44
3137.1	-10.6348	-125.998	10.093	146.184
3137.27	-9.28325	-123.3	11.432	146.164
3137.45	-7.77681	-119.209	12.6422	144.493
3137.62	-6.14059	-111.762	13.8378	139.438
3137.79	-4.4019	-98.5594	14.8838	128.327
3137.97	-2.58972	-77.8709	15.1976	108.266
3138.14	-0.7343	-50.2539	13.896	78.0459
3138.32	1.13342	-21.4504	10.3604	42.1713
3138.49	2.98229	-23.1967	4.88111	32.9589
3138.67	4.78147	-59.4971	-1.21441	57.0683
3138.84	6.50094	-92.7934	-6.20534	80.3827
3139.01	8.11202	-116.598	-8.93316	98.7314
3139.19	9.58785	-130.956	-9.3035	112.349
3139.36	10.9038	-138.086	-8.04869	121.989
3139.54	12.0379	-140.701	-6.12105	128.459
3139.71	12.9713	-141.041	-4.22772	132.586
3139.88	13.6883	-140.527	-2.70079	135.126
3140.06	14.1771	-139.853	-1.59155	136.67
3140.23	14.4295	-139.257	-0.813963	137.629
3140.41	14.4412	-138.761	-0.243587	138.274
3140.58	14.2121	-138.305	0.239723	138.784
3140.75	13.7459	-137.802	0.743835	139.289
3140.93	13.0506	-137.153	1.36759	139.888
3141.1	12.1376	-136.254	2.19847	140.651
3141.28	11.0222	-135.018	3.295	141.608
3141.45	9.72295	-133.408	4.65542	142.719
3141.62	8.26161	-131.483	6.19296	143.869
3141.8	6.66251	-129.38	7.75292	144.886
3141.97	4.95233	-127.149	9.19035	145.53
3142.15	3.15959	-124.422	10.467	145.356
3142.32	1.3142	-120.072	11.6669	143.406
3142.49	-0.553057	-112.147	12.8497	137.846
3142.67	-2.41104	-98.3226	13.7934	125.909
3142.84	-4.22875	-76.99	13.8404	104.671
3143.02	-5.97587	-48.7218	12.1054	72.9326
3143.19	-7.62326	-18.4439	8.07768	34.5992
3143.37	-9.14344	-22.2982	2.23294	26.764
3143.54	-10.5111	-61.0477	-3.93964	53.1685
3143.71	-11.7033	-94.4675	-8.68173	77.104
3143.89	-12.7002	-117.987	-10.9352	96.1163
3144.06	-13.4853	-132.02	-10.7668	110.486
3144.24	-14.0454	-138.862	-9.03874	120.784
3144.41	-14.3711	-141.241	-6.75986	127.721
3144.58	-14.4571	-141.407	-4.6346	132.138
3144.76	-14.3018	-140.776	-2.96608	134.844
3144.93	-13.908	-140.029	-1.77498	136.479
3145.11	-13.2821	-139.393	-0.952958	137.487
3145.28	-12.4346	-138.879	-0.362476	138.154
3145.45	-11.3797	-138.423	0.122633	138.668
3145.63	-10.1348	-137.937	0.611124	139.16
3145.8	-8.72089	-137.329	1.19891	139.727
3145.98	-7.16143	-136.503	1.96806	140.439
3146.15	-5.48247	-135.38	2.97174	141.324
3146.32	-3.712	-133.933	4.20752	142.348
3146.5	-1.87957	-132.208	5.59852	143.405
3146.67	-0.0157303	-130.301	7.01321	144.327
3146.85	1.84842	-128.191	8.33643	144.864
3147.02	3.6818	-125.435	9.54839	144.532
3147.2	5.45381	-120.869	10.7183	142.305
3147.37	7.1349	-112.563	11.8485	136.26
3147.54	8.69703	-98.2905	12.6334	123.557
3147.72	10.1141	-76.5856	12.3531	101.292
3147.89	11.3626	-48.0635	10.1397	68.343
3148.07	12.4216	-16.7162	5.60923	27.9347
3148.24	13.2734	-22.5625	-0.570472	21.4216
3148.41	13.9039	-62.8831	-6.76077	49.3616
3148.59	14.3025	-96.1576	-11.1901	73.7773
3148.76	14.4626	-119.333	-12.922	93.4888
3148.94	14.3814	-133.042	-12.1925	108.657
3149.11	14.0605	-139.603	-9.98823	119.626
3149.28	13.5051	-141.754	-7.36542	127.023
3149.46	12.7244	-141.753	-5.01797	131.717
3149.63	11.7316	-141.011	-3.2161	134.579
3149.81	10.5431	-140.197	-1.9489	136.3
3149.98	9.17882	-139.523	-1.08601	137.351
3150.15	7.66147	-138.993	-0.477387	138.038
3150.33	6.01638	-138.537	0.00870323	138.555
3150.5	4.27099	-138.069	0.481711	139.033
3150.68	2.4544	-137.499	1.03473	139.569
3150.85	0.596928	-136.741	1.74483	140.231
3151.03	-1.27045	-135.725	2.66047	141.046
3151.2	-3.11659	-134.425	3.77915	141.983
3151.37	-4.91068	-132.879	5.03362	142.946
3151.55	-6.62282	-131.144	6.31335	143.771
3151.72	-8.22443	-129.139	7.52834	144.196
3151.9	-9.6888	-126.361	8.67065	143.703
3152.07	-10.9915	-121.626	9.78882	141.203
3152.24	-12.1108	-113.045	10.8254	134.696
3152.42	-13.0281	-98.5056	11.3967	121.299
3152.59	-13.7279	-76.7073	10.7338	98.175
3152.77	-14.1988	-48.3451	8.00592	64.357
3152.94	-14.4327	-16.642	2.97282	22.5876
3153.11	-14.4259	-23.922	-3.50215	16.9177
3153.29	-14.1783	-64.8633	-9.64643	45.5704
3153.46	-13.6943	-97.8032	-13.7007	70.4019
3153.64	-12.9817	-120.615	-14.8697	90.8756
3153.81	-12.0525	-134.013	-13.5635	106.886
3153.98	-10.9223	-140.305	-10.8864	118.532
3154.16	-9.60981	-142.237	-7.93136	126.375
3154.33	-8.13698	-142.077	-5.3741	131.329
3154.51	-6.52836	-141.232	-3.44865	134.334
3154.68	-4.8108	-140.355	-2.1119	136.132
3154.86	-3.01294	-139.647	-1.21215	137.223
3155.03	-1.16476	-139.102	-0.587574	137.927
3155.2	0.702886	-138.648	-0.101431	138.445
3155.38	2.55886	-138.197	0.356201	138.909
3155.55	4.37221	-137.664	0.875683	139.415
3155.73	6.11268	-136.969	1.52948	140.028
3155.9	7.75124	-136.051	2.36191	140.775
3156.07	9.26055	-134.886	3.37082	141.628
3156.25	10.6154	-133.5	4.49812	142.496
3156.42	11.7933	-131.918	5.65195	143.222
3156.6	12.7745	-130.006	6.76273	143.532
3156.77	13.5427	-127.22	7.82826	142.876
3156.94	14.0851	-122.368	8.87112	140.111
3157.12	14.3925	-113.622	9.77329	133.169
3157.29	14.4599	-98.999	10.0788	119.156
3157.47	14.2862	-77.3801	8.98425	95.3486
3157.64	13.8742	-49.5693	5.71537	61.0001
3157.81	13.2309	-18.43	0.190724	18.8114
3157.99	12.3669	-26.1317	-6.53136	13.069
3158.16	11.2966	-66.8567	-12.5629	41.7308
3158.34	10.038	-99.3585	-16.1827	66.993
3158.51	8.61201	-121.821	-16.7544	88.3121
3158.68	7.04242	-134.93	-14.8637	105.203
3158.86	5.3554	-140.967	-11.7235	117.52
3159.03	3.5791	-142.689	-8.45199	125.785
3159.21	1.74316	-142.378	-5.69977	130.978
3159.38	-0.121813	-141.435	-3.66179	134.112
3159.56	-1.9847	-140.503	-2.26275	135.977
3159.73	-3.81443	-139.764	-1.33048	137.103
3159.9	-5.58048	-139.207	-0.692345	137.822
3160.08	-7.2534	-138.754	-0.20718	138.339
3160.25	-8.80527	-138.319	0.235149	138.79
3160.43	-10.2102	-137.822	0.722338	139.266
3160.6	-11.4448	-137.187	1.32258	139.832
3160.77	-12.4884	-136.359	2.07657	140.512
3160.95	-13.3237	-135.317	2.98278	141.283
3161.12	-13.9367	-134.075	3.99156	142.059
3161.3	-14.3171	-132.629	5.02723	142.684
3161.47	-14.4587	-130.805	6.03605	142.877
3161.64	-14.359	-128.028	7.01583	142.06
3161.82	-14.0198	-123.118	7.9588	139.035
3161.99	-13.4467	-114.317	8.68639	131.69
3162.17	-12.6492	-99.7892	8.67765	117.144
3162.34	-11.6407	-78.6008	7.10989	92.8206
3162.51	-10.438	-51.6685	3.28386	58.2362
3162.69	-9.06105	-21.8604	-2.71055	16.4393
3162.86	-7.53296	-28.8242	-9.62419	9.57579
3163.04	-5.87915	-68.7525	-15.475	37.8025
3163.21	-4.12723	-100.796	-18.6056	63.5845
3163.39	-2.30642	-122.949	-18.5534	85.8425
3163.56	-0.447075	-135.796	-16.0784	103.639
3163.73	1.41977	-141.589	-12.4906	116.607
3163.91	3.26299	-143.108	-8.92244	125.263
3164.08	5.05183	-142.653	-5.99226	130.669
3164.26	6.75646	-141.622	-3.85392	133.914
3164.43	8.34844	-140.638	-2.40038	135.837
3164.6	9.80121	-139.873	-1.44024	136.992
3164.78	11.0905	-139.305	-0.791082	137.723
3164.95	12.1949	-138.855	-0.308005	138.239
3165.13	13.096	-138.437	0.11906	138.675
3165.3	13.7786	-137.973	0.575188	139.123
3165.47	14.2314	-137.394	1.12461	139.643
3165.65	14.447	-136.65	1.80482	140.26
3165.82	14.4215	-135.72	2.615	140.95
3166	14.1556	-134.608	3.51316	141.635
3166.17	13.6536	-133.286	4.43717	142.16
3166.34	12.9239	-131.547	5.34469	142.237
3166.52	11.9787	-128.801	6.22831	141.258
3166.69	10.8338	-123.891	7.0464	137.984
3166.87	9.50813	-115.146	7.56096	130.268
3167.04	8.02395	-100.881	7.19434	115.269
3167.22	6.40597	-80.3385	5.11992	90.5784
3167.39	4.6812	-54.5134	0.731298	55.976
3167.56	2.87839	-26.3497	-5.70082	14.948
3167.74	1.02762	-31.6155	-12.7443	6.12688
3167.91	-0.840244	-70.4703	-18.3466	33.7772
3168.09	-2.69404	-102.108	-20.9391	60.2292
3168.26	-4.50284	-124.008	-20.2451	83.5177
3168.43	-6.23648	-136.615	-17.194	102.227
3168.61	-7.86605	-142.171	-13.1804	115.81
3168.78	-9.36435	-143.494	-9.33877	124.816
3168.96	-10.7064	-142.903	-6.24947	130.405
3169.13	-11.8698	-141.79	-4.02381	133.743
3169.3	-12.8352	-140.761	-2.52398	135.713
3169.48	-13.5864	-139.973	-1.54079	136.892
3169.65	-14.1109	-139.397	-0.883245	137.631
3169.83	-14.4001	-138.951	-0.403424	138.144
3170	-14.4489	-138.549	0.00838186	138.566
3170.17	-14.2567	-138.117	0.434657	138.986
3170.35	-13.8266	-137.59	0.935945	139.462
3170.52	-13.1659	-136.923	1.54685	140.017
3170.7	-12.2855	-136.096	2.2673	140.631
3170.87	-11.2001	-135.103	3.06193	141.226
3171.04	-9.92782	-133.894	3.8796	141.653
3171.22	-8.4899	-132.243	4.68509	141.613
3171.39	-6.91032	-129.552	5.46115	140.474
3171.57	-5.21541	-124.701	6.1296	136.96
3171.74	-3.43346	-116.115	6.39517	128.906
3171.92	-1.59419	-102.264	5.63268	113.529
3172.09	0.271727	-82.5374	3.02718	88.5917
3172.26	2.13316	-57.9339	-1.91862	54.0967
3172.44	3.95907	-31.2903	-8.74682	13.7967
3172.61	5.71898	-34.1836	-15.8538	2.47592
3172.79	7.38356	-71.9681	-21.1417	29.6847
3172.96	8.92502	-103.308	-23.1548	56.9988
3173.13	10.3177	-125.014	-21.8101	81.394
3173.31	11.5383	-137.396	-18.1992	100.998
3173.48	12.5664	-142.716	-13.7867	115.142
3173.66	13.385	-143.846	-9.69806	124.45
3173.83	13.9804	-143.127	-6.46996	130.188
3174	14.3427	-141.94	-4.17064	133.598
3174.18	14.4658	-140.871	-2.63293	135.605
3174.35	14.3476	-140.064	-1.63162	136.801
3174.53	13.9901	-139.482	-0.968384	137.546
3174.7	13.3994	-139.041	-0.493018	138.055
3174.87	12.5851	-138.655	-0.0964925	138.462
3175.05	11.561	-138.253	0.301101	138.855
3175.22	10.3441	-137.775	0.756849	139.289
3175.4	8.95476	-137.18	1.30273	139.786
3175.57	7.41606	-136.447	1.9393	140.325
3175.75	5.75371	-135.561	2.63674	140.835
3175.92	3.99544	-134.46	3.35228	141.165
3176.09	2.17057	-132.901	4.0539	141.008
3176.27	0.309543	-130.291	4.71045	139.712
3176.44	-1.55659	-125.557	5.20538	135.967
3176.62	-3.39671	-117.227	5.18931	127.606
3176.79	-5.18012	-103.917	3.99942	111.916
3176.96	-6.87707	-85.1217	0.847895	86.8175
3177.14	-8.45926	-61.7446	-4.63891	52.4668
3177.31	-9.90029	-36.2461	-11.8129	12.6203
3177.49	-11.1761	-36.2957	-18.914	-1.53242
3177.66	-12.2655	-73.2482	-23.8254	25.5973
3177.83	-13.1502	-104.433	-25.2258	53.9816
3178.01	-13.8155	-125.992	-23.2312	79.5294
3178.18	-14.2504	-138.149	-19.0846	99.9802
3178.36	-14.4474	-143.227	-14.3052	114.617
3178.53	-14.4034	-144.166	-9.99848	124.169
3178.7	-14.1192	-143.326	-6.65296	130.02
3178.88	-13.5993	-142.07	-4.29397	133.483
3179.05	-12.8526	-140.968	-2.7269	135.514
3179.23	-11.8914	-140.146	-1.71238	136.721
3179.4	-10.7318	-139.561	-1.04614	137.468
3179.58	-9.39315	-139.125	-0.576439	137.972
3179.75	-7.89777	-138.755	-0.195231	138.364
3179.92	-6.2706	-138.381	0.174813	138.731
3180.1	-4.53878	-137.95	0.587517	139.125
3180.27	-2.73121	-137.421	1.07242	139.565
3180.45	-0.878019	-136.773	1.63051	140.034
3180.62	0.989865	-135.988	2.23634	140.461
3180.79	2.84129	-134.99	2.85303	140.696
3180.97	4.64537	-133.528	3.44809	140.424
3181.14	6.37202	-131.025	3.97305	138.971
3181.32	7.99242	-126.462	4.2721	135.006
3181.49	9.47957	-118.474	3.94576	126.365
3181.66	10.8086	-105.806	2.30408	110.414
3181.84	11.9575	-88.0034	-1.39857	85.2063
3182.01	12.9069	-65.7672	-7.39982	50.9675
3182.19	13.6411	-40.9565	-14.862	11.2325
3182.36	14.1478	-37.8101	-21.8864	-5.96281
3182.53	14.4185	-74.3619	-26.3644	21.6331
3182.71	14.4488	-105.535	-27.1284	51.2783
3182.88	14.2382	-126.969	-24.4941	77.9808
3183.06	13.7901	-138.886	-19.8431	99.1994
3183.23	13.112	-143.708	-14.7333	114.242
3183.4	12.2152	-144.455	-10.2393	123.976
3183.58	11.1148	-143.498	-6.79842	129.901
3183.75	9.82898	-142.183	-4.39381	133.395
3183.93	8.37928	-141.052	-2.80578	135.44
3184.1	6.78987	-140.218	-1.78289	136.653
3184.28	5.08724	-139.632	-1.11627	137.399
3184.45	3.29981	-139.202	-0.65341	137.895
3184.62	1.45739	-138.848	-0.287565	138.273
3184.8	-0.409287	-138.502	0.0560175	138.614
3184.97	-2.26909	-138.113	0.428061	138.969
3185.15	-4.09099	-137.645	0.855791	139.357
3185.32	-5.8446	-137.078	1.34035	139.759
3185.49	-7.50067	-136.386	1.85947	140.105
3185.67	-9.03157	-135.487	2.37976	140.247
3185.84	-10.4118	-134.13	2.86499	139.86
3186.02	-11.6182	-131.759	3.24665	138.253
3186.19	-12.6309	-127.417	3.32952	134.076
3186.36	-13.4328	-119.843	2.66898	125.181
3186.54	-14.0105	-107.889	0.558789	109.006
3186.71	-14.3546	-91.0894	-3.69017	83.7091
3186.89	-14.4591	-69.8467	-10.1696	49.5076
3187.06	-14.3224	-45.2914	-17.8562	9.57901
3187.23	-13.9467	-38.682	-24.7336	-10.7852
3187.41	-13.3384	-75.4118	-28.728	17.9558
3187.58	-12.5075	-106.68	-28.8417	48.9964
3187.76	-11.4679	-127.975	-25.5878	76.7999
3187.93	-10.237	-139.615	-20.4705	98.6744
3188.11	-8.83527	-144.163	-15.0701	114.023
3188.28	-7.28612	-144.714	-10.4211	123.871
3188.45	-5.61539	-143.646	-6.90699	129.832
3188.63	-3.85093	-142.277	-4.4706	133.336
3188.8	-2.02219	-141.123	-2.86975	135.383
3188.98	-0.159672	-140.281	-1.8431	136.595
3189.15	1.70557	-139.695	-1.17862	137.338
3189.32	3.5424	-139.273	-0.723729	137.826
3189.5	5.3202	-138.935	-0.373286	138.188
3189.67	7.00931	-138.615	-0.055121	138.505
3189.85	8.58155	-138.266	0.278526	138.823
3190.02	10.0107	-137.855	0.65264	139.161
3190.19	11.2729	-137.362	1.06816	139.498
3190.37	12.3471	-136.758	1.50486	139.768
3190.54	13.2155	-135.957	1.93054	139.818
3190.72	13.8634	-134.712	2.30242	139.317
3190.89	14.2802	-132.497	2.52979	137.557
3191.06	14.4587	-128.42	2.37883	133.177
3191.24	14.3962	-121.316	1.36536	124.047
3191.41	14.0936	-110.119	-1.22201	107.675
3191.59	13.5559	-94.2887	-6.00266	82.2834
3191.76	12.7922	-73.8601	-12.915	48.03
3191.94	11.8152	-49.2166	-20.7579	7.70077
3192.11	10.6411	-39.0079	-27.4202	-15.8324
3192.28	9.28954	-76.5473	-30.8889	14.7695
3192.46	7.78311	-107.939	-30.349	47.2412
3192.63	6.1469	-129.039	-26.5045	76.0295
3192.81	4.40822	-140.348	-20.9649	98.4178
3192.98	2.59605	-144.594	-15.3166	113.96
3193.15	0.740626	-144.944	-10.5454	123.853
3193.33	-1.1271	-143.77	-6.98005	129.81
3193.5	-2.97597	-142.353	-4.52521	133.303
3193.68	-4.77515	-141.181	-2.91922	135.343
3193.85	-6.49463	-140.335	-1.89315	136.549
3194.02	-8.10572	-139.751	-1.23314	137.285
3194.2	-9.58156	-139.338	-0.787276	137.763
3194.37	-10.8975	-139.014	-0.452255	138.11
3194.55	-12.0317	-138.72	-0.158502	138.403
3194.72	-12.965	-138.409	0.13889	138.687
3194.89	-13.6821	-138.051	0.462694	138.976
3195.07	-14.1709	-137.626	0.813278	139.253
3195.24	-14.4233	-137.106	1.17128	139.448
3195.42	-14.435	-136.401	1.50366	139.409
3195.59	-14.2059	-135.278	1.75865	138.795
3195.76	-13.7398	-133.24	1.82192	136.884
3195.94	-13.0445	-129.462	1.42255	132.308
3196.11	-12.1315	-122.872	0.0431251	122.958
3196.29	-11.0161	-112.445	-3.02188	106.401
3196.46	-9.71689	-97.5181	-8.31016	80.8978
3196.64	-8.25556	-77.7198	-15.6025	46.5148
3196.81	-6.65647	-52.7758	-23.5308	5.71425
3196.98	-4.9463	-39.1908	-29.9137	-20.6365
3197.16	-3.15356	-77.9503	-32.8238	12.3026
3197.33	-1.30818	-109.382	-31.6377	46.1068
3197.51	0.559078	-130.181	-27.2402	75.7002
3197.68	2.41706	-141.089	-21.3273	98.434
3197.85	4.23478	-145.003	-15.4755	114.052
3198.03	5.9819	-145.148	-10.6151	123.918
3198.2	7.6293	-143.873	-7.01965	129.833
3198.38	9.14949	-142.414	-4.55889	133.296
3198.55	10.5171	-141.228	-2.95486	135.318
3198.72	11.7094	-140.38	-1.93331	136.513
3198.9	12.7063	-139.8	-1.2799	137.24
3199.07	13.4914	-139.395	-0.844008	137.707
3199.25	14.0515	-139.087	-0.524397	138.039
3199.42	14.3773	-138.817	-0.254086	138.309
3199.59	14.4632	-138.541	0.00907234	138.559
3199.77	14.308	-138.232	0.285633	138.804
3199.94	13.9142	-137.872	0.57499	139.022
3200.12	13.2883	-137.431	0.857555	139.146
3200.29	12.4409	-136.824	1.09763	139.019
3200.47	11.3859	-135.828	1.23246	138.293
3200.64	10.1411	-133.986	1.12333	136.232
3200.81	8.72717	-130.537	0.464487	131.466
3200.99	7.16772	-124.484	-1.28795	121.908
3201.16	5.48877	-114.818	-4.8228	105.173
3201.34	3.71831	-100.707	-10.5858	79.5352
3201.51	1.88588	-81.3745	-18.1986	44.9773
3201.68	0.0220369	-56.0792	-26.1403	3.79853
3201.86	-1.84212	-40.3313	-32.1852	-24.0392
3202.03	-3.67549	-79.8061	-34.5139	10.7782
3202.21	-5.44751	-111.065	-32.6995	45.6661
3202.38	-7.12861	-131.417	-27.7946	75.8274
3202.55	-8.69075	-141.842	-21.5612	98.7193
3202.73	-10.1079	-145.393	-15.5514	114.29
3202.9	-11.3563	-145.328	-10.634	124.06
3203.08	-12.4153	-143.955	-7.02851	129.898
3203.25	-13.2672	-142.459	-4.57331	133.313
3203.42	-13.8977	-141.263	-2.97758	135.308
3203.6	-14.2963	-140.416	-1.96403	136.488
3203.77	-14.4564	-139.841	-1.31908	137.203
3203.95	-14.3753	-139.447	-0.893964	137.659
3204.12	-14.0544	-139.154	-0.589707	137.974
3204.3	-13.499	-138.906	-0.341897	138.222
3204.47	-12.7183	-138.663	-0.111066	138.441
3204.64	-11.7255	-138.401	0.121089	138.643
3204.82	-10.5371	-138.101	0.352587	138.806
3204.99	-9.17278	-137.736	0.562604	138.862
3205.17	-7.65545	-137.226	0.711198	138.648
3205.34	-6.01036	-136.365	0.723103	137.811
3205.51	-4.26498	-134.732	0.435091	135.603
3205.69	-2.4484	-131.632	-0.490469	130.651
3205.86	-0.590926	-126.127	-2.61678	120.893
3206.04	1.27645	-117.193	-6.6056	103.982
3206.21	3.12259	-103.799	-12.8022	78.1943
3206.38	4.91669	-84.8068	-20.671	43.4648
3206.56	6.62883	-59.2912	-28.5551	2.181
3206.73	8.23045	-43.8712	-34.2105	-24.5498
3206.91	9.69484	-82.264	-35.9456	10.3728
3207.08	10.9976	-113.024	-33.5311	45.9621
3207.25	12.1169	-132.753	-28.171	76.4105
3207.43	13.0341	-142.608	-21.6731	99.2617
3207.6	13.734	-145.765	-15.5507	114.664
3207.78	14.2049	-145.486	-10.6071	124.272
3207.95	14.4389	-144.019	-7.00995	129.999
3208.13	14.432	-142.491	-4.57049	133.35
3208.3	14.1845	-141.288	-2.9885	135.311
3208.47	13.7005	-140.444	-1.98589	136.472
3208.65	12.9879	-139.876	-1.35095	137.174
3208.82	12.0588	-139.491	-0.937263	137.617
3209	10.9285	-139.213	-0.648244	137.917
3209.17	9.61606	-138.987	-0.422018	138.143
3209.34	8.14324	-138.776	-0.22172	138.332
3209.52	6.53463	-138.557	-0.0313479	138.494
3209.69	4.81708	-138.314	0.145354	138.605
3209.87	3.01922	-138.023	0.285411	138.594
3210.04	1.17105	-137.609	0.343322	138.296
3210.21	-0.696599	-136.888	0.230269	137.348
3210.39	-2.55258	-135.476	-0.241004	134.994
3210.56	-4.36593	-132.735	-1.43647	129.862
3210.74	-6.10641	-127.775	-3.93125	119.912
3210.91	-7.74497	-119.529	-8.35045	102.828
3211.08	-9.2543	-106.755	-14.9325	76.8899
3211.26	-10.6092	-88.0299	-22.9893	42.0512
3211.43	-11.7871	-62.6072	-30.7473	1.11267
3211.61	-12.7683	-49.5867	-35.97	-22.3534
3211.78	-13.5365	-85.3997	-37.1105	11.1787
3211.95	-14.0789	-115.271	-34.1338	47.003
3212.13	-14.3863	-134.185	-28.3767	77.4317
3212.3	-14.4538	-143.385	-21.6717	100.041
3212.48	-14.2801	-146.12	-15.4812	115.158
3212.65	-13.8681	-145.624	-10.5401	124.543
3212.83	-13.2248	-144.067	-6.96783	130.131
3213	-12.3608	-142.511	-4.55277	133.406
3213.17	-11.2906	-141.304	-2.98895	135.326
3213.35	-10.032	-140.464	-1.99959	136.465
3213.52	-8.606	-139.904	-1.37588	137.152
3213.7	-7.03641	-139.53	-0.974101	137.581
3213.87	-5.3494	-139.266	-0.70014	137.866
3214.04	-3.57311	-139.061	-0.494598	138.072
3214.22	-1.73717	-138.879	-0.323144	138.233
3214.39	0.127796	-138.7	-0.172131	138.356
3214.57	1.99068	-138.512	-0.0474343	138.417
3214.74	3.82042	-138.292	0.025032	138.342
3214.91	5.58647	-137.975	-0.00683194	137.962
3215.09	7.2594	-137.397	-0.245977	136.905
3215.26	8.81128	-136.213	-0.902597	134.407
3215.44	10.2162	-133.835	-2.36695	129.101
3215.61	11.4508	-129.404	-5.21863	118.967
3215.78	12.4945	-121.791	-10.0374	101.716
3215.96	13.3298	-109.553	-16.9508	75.651
3216.13	13.9427	-91.0822	-25.1258	40.8305
3216.31	14.3232	-66.2165	-32.6934	0.829804
3216.48	14.4648	-56.4186	-37.4499	-18.4812
3216.66	14.3652	-89.1996	-38.006	13.1876
3216.83	14.026	-117.789	-34.5139	48.7613
3217	13.4529	-135.703	-28.4225	78.8579
3217.18	12.6554	-144.168	-21.5684	101.031
3217.35	11.6469	-146.459	-15.3521	115.755
3217.53	10.4442	-145.744	-10.4399	124.865
3217.7	9.06729	-144.102	-6.9065	130.289
3217.87	7.5392	-142.521	-4.52275	133.476
3218.05	5.88541	-141.313	-2.98043	135.352
3218.22	4.1335	-140.478	-2.00598	136.466
3218.4	2.31268	-139.926	-1.39432	137.137
3218.57	0.453344	-139.562	-1.00475	137.553
3218.74	-1.41351	-139.313	-0.745593	137.822
3218.92	-3.25673	-139.127	-0.559849	138.008
3219.09	-5.04557	-138.973	-0.41565	138.142
3219.27	-6.75021	-138.832	-0.301762	138.229
3219.44	-8.3422	-138.695	-0.226521	138.242
3219.61	-9.79498	-138.545	-0.219437	138.106
3219.79	-11.0843	-138.325	-0.339954	137.645
3219.96	-12.1887	-137.891	-0.705274	136.48
3220.14	-13.0898	-136.937	-1.54689	133.843
3220.31	-13.7724	-134.918	-3.27484	128.368
3220.49	-14.2253	-130.992	-6.46587	118.06
3220.66	-14.4408	-123.954	-11.6469	100.66
3220.83	-14.4154	-112.185	-18.8327	74.5191
3221.01	-14.1495	-94.0202	-27.0561	39.9081
3221.18	-13.6476	-70.2597	-34.3749	1.50989
3221.36	-12.9179	-63.7641	-38.6421	-13.5202
3221.53	-11.9727	-93.5725	-38.635	16.3025
3221.7	-10.8277	-120.542	-34.6823	51.1775
3221.88	-9.50212	-137.287	-28.3224	80.6426
3222.05	-8.01795	-144.952	-21.3765	102.199
3222.23	-6.39999	-146.782	-15.1743	116.434
3222.4	-4.67522	-145.851	-10.3138	125.223
3222.57	-2.87242	-144.127	-6.8307	130.465
3222.75	-1.02165	-142.524	-4.4833	133.558
3222.92	0.846209	-141.314	-2.96456	135.385
3223.1	2.7	-140.485	-2.00596	136.473
3223.27	4.50881	-139.942	-1.40683	137.128
3223.44	6.24246	-139.589	-1.02955	137.53
3223.62	7.87203	-139.354	-0.784868	137.784
3223.79	9.37035	-139.187	-0.618051	137.951
3223.97	10.7124	-139.059	-0.499618	138.059
3224.14	11.8758	-138.954	-0.420805	138.112
3224.31	12.8412	-138.866	-0.392688	138.08
3224.49	13.5925	-138.782	-0.448887	137.884
3224.66	14.117	-138.658	-0.656643	137.344
3224.84	14.4061	-138.369	-1.14707	136.075
3225.01	14.455	-137.644	-2.1708	133.302
3225.19	14.2628	-135.974	-4.15283	127.668
3225.36	13.8328	-132.521	-7.66001	117.201
3225.53	13.1721	-126.001	-13.1601	99.6803
3225.71	12.2917	-114.657	-20.5562	73.5448
3225.88	11.2063	-96.9103	-28.7596	39.3911
3226.06	9.93403	-74.7978	-35.7788	3.24031
3226.23	8.49613	-71.3273	-39.5445	-7.76177
3226.4	6.91655	-98.3798	-39.0063	20.3672
3226.58	5.22166	-123.476	-34.6546	54.1667
3226.75	3.43971	-138.916	-28.0939	82.7283
3226.93	1.60044	-145.73	-21.1113	103.508
3227.1	-0.265476	-147.092	-14.9593	117.174
3227.27	-2.12691	-145.947	-10.1698	125.608
3227.45	-3.95282	-144.145	-6.74551	130.654
3227.62	-5.71275	-142.521	-4.43742	133.647
3227.8	-7.37733	-141.311	-2.94311	135.425
3227.97	-8.9188	-140.488	-2.00057	136.487
3228.14	-10.3115	-139.953	-1.41401	137.125
3228.32	-11.5321	-139.61	-1.04892	137.513
3228.49	-12.5603	-139.388	-0.8183	137.752
3228.67	-13.3789	-139.239	-0.669553	137.9
3228.84	-13.9743	-139.136	-0.575501	137.985
3229.02	-14.3366	-139.065	-0.529892	138.006
3229.19	-14.4597	-139.024	-0.546777	137.93
3229.36	-14.3415	-139.005	-0.664244	137.677
3229.54	-13.9841	-138.975	-0.957485	137.06
3229.71	-13.3933	-138.83	-1.57076	135.689
3229.89	-12.5791	-138.328	-2.77117	132.786
3230.06	-11.555	-136.992	-4.99366	127.004
3230.23	-10.3382	-133.975	-8.78854	116.398
3230.41	-8.94878	-127.921	-14.5599	98.8007
3230.58	-7.41009	-116.988	-22.1021	72.7834
3230.76	-5.74775	-99.8182	-30.2204	39.3773
3230.93	-3.98948	-79.8093	-36.8976	6.01405
3231.1	-2.16462	-78.9313	-40.1612	-1.39118
3231.28	-0.303597	-103.466	-39.1339	25.1986
3231.45	1.56254	-126.527	-34.4503	57.6264
3231.63	3.40266	-140.564	-27.7569	85.0504
3231.8	5.18608	-146.498	-20.7901	104.918
3231.97	6.88304	-147.39	-14.7199	117.95
3232.15	8.46523	-146.037	-10.0165	126.004
3232.32	9.90628	-144.159	-6.65623	130.847
3232.5	11.1821	-142.516	-4.38826	133.739
3232.67	12.2715	-141.304	-2.91788	135.469
3232.85	13.1562	-140.487	-1.99086	136.505
3233.02	13.8216	-139.96	-1.41652	137.127
3233.19	14.2564	-139.627	-1.06333	137.5
3233.37	14.4535	-139.418	-0.846288	137.725
3233.54	14.4095	-139.286	-0.714778	137.856
3233.72	14.1253	-139.206	-0.643835	137.918
3233.89	13.6054	-139.167	-0.629752	137.908
3234.06	12.8587	-139.171	-0.689726	137.791
3234.24	11.8976	-139.215	-0.866524	137.482
3234.41	10.738	-139.277	-1.24314	136.791
3234.59	9.39935	-139.273	-1.97576	135.321
3234.76	7.90398	-138.987	-3.34495	132.297
3234.93	6.27682	-137.963	-5.79035	126.382
3235.11	4.54501	-135.345	-9.83981	115.665
3235.28	2.73744	-129.711	-15.8307	98.0498
3235.46	0.884251	-119.199	-23.4544	72.2905
3235.63	-0.983634	-102.8	-31.4274	39.9453
3235.8	-2.83506	-85.2095	-37.73	9.74947
3235.98	-4.63915	-86.4498	-40.5024	5.44487
3236.15	-6.3658	-108.684	-39.0372	30.6094
3236.33	-7.98622	-129.631	-34.093	61.4446
3236.5	-9.47337	-142.208	-27.3342	87.5397
3236.67	-10.8025	-147.251	-20.4312	106.388
3236.85	-11.9513	-147.68	-14.4694	118.741
3237.02	-12.9007	-146.125	-9.86277	126.4
3237.2	-13.6349	-144.174	-6.56829	131.038
3237.37	-14.1417	-142.51	-4.33902	133.832
3237.55	-14.4124	-141.296	-2.89073	135.514
3237.72	-14.4428	-140.482	-1.97794	136.526
3237.89	-14.2321	-139.962	-1.41509	137.132
3238.07	-13.784	-139.639	-1.0733	137.493
3238.24	-13.106	-139.443	-0.869299	137.704
3238.42	-12.2092	-139.327	-0.754229	137.818
3238.59	-11.1088	-139.269	-0.705249	137.858
3238.76	-9.82301	-139.261	-0.721224	137.819
3238.94	-8.37333	-139.308	-0.82261	137.663
3239.11	-6.78392	-139.413	-1.0569	137.3
3239.29	-5.08131	-139.566	-1.51443	136.537
3239.46	-3.29388	-139.697	-2.36173	134.974
3239.63	-1.45146	-139.615	-3.88936	131.837
3239.81	0.415214	-138.88	-6.53653	125.807
3239.98	2.27502	-136.622	-10.8034	115.016
3240.16	4.09692	-131.375	-16.9594	97.4566
3240.33	5.85054	-121.319	-24.6009	72.1174
3240.5	7.50661	-105.894	-32.3745	41.1451
3240.68	9.03753	-90.88	-38.2806	14.3189
3240.85	10.4177	-93.7835	-40.5841	12.6152
3241.03	11.6242	-113.902	-38.7404	36.4213
3241.2	12.6369	-132.726	-33.6098	65.5064
3241.38	13.4388	-143.827	-26.8504	90.1261
3241.55	14.0166	-147.986	-20.0543	107.877
3241.72	14.3606	-147.965	-14.2218	119.522
3241.9	14.4652	-146.217	-9.7175	126.782
3242.07	14.3285	-144.194	-6.48716	131.219
3242.25	13.9528	-142.506	-4.2929	133.92
3242.42	13.3445	-141.287	-2.86353	135.56
3242.59	12.5136	-140.475	-1.96295	136.549
3242.77	11.4741	-139.962	-1.41047	137.141
3242.94	10.2432	-139.648	-1.07941	137.489
3243.12	8.84146	-139.463	-0.887863	137.687
3243.29	7.29232	-139.363	-0.788492	137.786
3243.46	5.62159	-139.326	-0.760484	137.805
3243.64	3.85714	-139.348	-0.805292	137.737
3243.81	2.02841	-139.436	-0.946688	137.542
3243.99	0.165885	-139.601	-1.23676	137.128
3244.16	-1.69935	-139.841	-1.77249	136.296
3244.33	-3.5362	-140.102	-2.72868	134.645
3244.51	-5.314	-140.211	-4.40219	131.407
3244.68	-7.00312	-139.74	-7.22666	125.286
3244.86	-8.57537	-137.804	-11.6702	114.464
3245.03	-10.0045	-132.92	-17.9353	97.0494
3245.21	-11.2668	-123.373	-25.5334	72.3065
3245.38	-12.341	-109.116	-33.0611	42.9937
3245.55	-13.2094	-96.6925	-38.5598	19.573
3245.73	-13.8573	-100.852	-40.4279	19.9967
3245.9	-14.2741	-119.015	-38.2724	42.4707
3246.08	-14.4527	-135.761	-33.0305	69.6996
3246.25	-14.3902	-145.404	-26.3321	92.7401
3246.42	-14.0876	-148.703	-19.6797	109.344
3246.6	-13.5499	-148.252	-13.9911	120.27
3246.77	-12.7862	-146.317	-9.58975	127.137
3246.95	-11.8092	-144.221	-6.41825	131.385
3247.12	-10.6351	-142.506	-4.25301	134
3247.29	-9.2836	-141.279	-2.83808	135.603
3247.47	-7.77718	-140.467	-1.94698	136.573
3247.64	-6.14098	-139.959	-1.40342	137.152
3247.82	-4.4023	-139.653	-1.08228	137.489
3247.99	-2.59014	-139.479	-0.902579	137.674
3248.16	-0.734717	-139.394	-0.818244	137.757
3248.34	1.13301	-139.377	-0.810407	137.756
3248.51	2.98188	-139.428	-0.883116	137.662
3248.69	4.78107	-139.556	-1.06346	137.43
3248.86	6.50055	-139.78	-1.40784	136.964
3249.03	8.11166	-140.104	-2.01882	136.066
3249.21	9.5875	-140.488	-3.07715	134.334
3249.38	10.9035	-140.774	-4.8819	131.01
3249.56	12.0376	-140.538	-7.85633	124.825
3249.73	12.971	-138.89	-12.4333	114.023
3249.91	13.6881	-134.355	-18.7509	96.8531
3250.08	14.1769	-125.383	-26.2481	72.8872
3250.25	14.4293	-112.458	-33.492	45.4742
3250.43	14.4411	-102.525	-38.5839	25.3571
3250.6	14.212	-107.593	-40.0605	27.472
3250.78	13.7459	-123.942	-37.6656	48.6107
3250.95	13.0506	-138.693	-32.3877	73.9179
3251.12	12.1376	-146.929	-25.8068	95.3157
3251.3	11.0222	-149.407	-19.3284	110.75
3251.47	9.72305	-148.546	-13.7916	120.963
3251.65	8.26173	-146.431	-9.48842	127.455
3251.82	6.66265	-144.261	-6.3668	131.527
3251.99	4.95248	-142.514	-4.22237	134.069
3252.17	3.15976	-141.273	-2.81612	135.641
3252.34	1.31437	-140.459	-1.93114	136.597
3252.52	-0.552883	-139.954	-1.39472	137.165
3252.69	-2.41087	-139.656	-1.08257	137.491
3252.86	-4.22859	-139.493	-0.914107	137.664
3253.04	-5.97572	-139.422	-0.844262	137.733
3253.21	-7.62313	-139.425	-0.856032	137.713
3253.39	-9.14333	-139.503	-0.95607	137.591
3253.56	-10.511	-139.672	-1.17472	137.322
3253.74	-11.7032	-139.952	-1.57227	136.808
3253.91	-12.7002	-140.358	-2.25552	135.847
3254.08	-13.4853	-140.857	-3.40837	134.041
3254.26	-14.0454	-141.302	-5.32794	130.646
3254.43	-14.3712	-141.273	-8.42246	124.429
3254.61	-14.4572	-139.881	-13.0876	113.706
3254.78	-14.302	-135.69	-19.4017	96.8868
3254.95	-13.9082	-127.364	-26.7455	73.8732
3255.13	-13.2823	-115.892	-33.6771	48.5379
3255.3	-12.4349	-108.269	-38.3745	31.5196
3255.48	-11.38	-113.956	-39.5134	34.9296
3255.65	-10.1352	-128.622	-36.956	54.7104
3255.82	-8.72125	-141.495	-31.7159	78.0632
3256	-7.16181	-148.397	-25.3032	97.7909
3256.17	-5.48286	-150.102	-19.0213	112.06
3256.35	-3.71241	-148.857	-13.6372	121.582
3256.52	-1.87998	-146.567	-9.42212	127.723
3256.69	-0.0161471	-144.316	-6.33778	131.641
3256.87	1.84801	-142.531	-4.20376	134.123
3257.04	3.68139	-141.272	-2.79927	135.673
3257.22	5.45341	-140.452	-1.91644	136.619
3257.39	7.13452	-139.949	-1.38513	137.178
3257.57	8.69667	-139.657	-1.08097	137.495
3257.74	10.1138	-139.504	-0.923177	137.657
3257.91	11.3623	-139.446	-0.867434	137.711
3258.09	12.4213	-139.469	-0.898545	137.672
3258.26	13.2732	-139.575	-1.02579	137.524
3258.44	13.9037	-139.784	-1.28264	137.219
3258.61	14.3023	-140.121	-1.73269	136.655
3258.78	14.4624	-140.604	-2.48531	135.634
3258.96	14.3814	-141.211	-3.72447	133.762
3259.13	14.0605	-141.797	-5.74086	130.315
3259.31	13.5051	-141.948	-8.92359	124.1
3259.48	12.7244	-140.782	-13.6304	113.521
3259.65	11.7316	-136.936	-19.8866	97.1626
3259.83	10.5432	-129.322	-27.0304	75.2611
3260	9.17892	-119.374	-33.6315	52.111
3260.18	7.6616	-113.834	-37.9585	37.9168
3260.35	6.01653	-119.909	-38.8221	42.2643
3260.52	4.27115	-133.019	-36.1823	60.6547
3260.7	2.45457	-144.149	-31.0508	82.0472
3260.87	0.597101	-149.81	-24.8502	100.11
3261.05	-1.27028	-150.798	-18.7793	113.239
3261.22	-3.11642	-149.191	-13.5417	122.108
3261.4	-4.91053	-146.729	-9.399	127.931
3261.57	-6.62268	-144.392	-6.33583	131.72
3261.74	-8.22431	-142.559	-4.19973	134.16
3261.92	-9.6887	-141.276	-2.78898	135.698
3262.09	-10.9914	-140.446	-1.90383	136.638
3262.27	-12.1108	-139.942	-1.37541	137.192
3262.44	-13.0281	-139.656	-1.07819	137.5
3262.61	-13.728	-139.513	-0.930584	137.652
3262.79	-14.1988	-139.469	-0.888768	137.692
3262.96	-14.4328	-139.512	-0.939331	137.633
3263.14	-14.426	-139.646	-1.09421	137.458
3263.31	-14.1785	-139.895	-1.38987	137.116
3263.48	-13.6945	-140.288	-1.89238	136.504
3263.66	-12.982	-140.848	-2.71178	135.424
3263.83	-12.0528	-141.553	-4.02859	133.496
3264.01	-10.9226	-142.262	-6.12256	130.016
3264.18	-9.61015	-142.562	-9.36001	123.842
3264.35	-8.13734	-141.596	-14.0615	113.473
3264.53	-6.52875	-138.099	-20.2079	97.6836
3264.7	-4.8112	-131.254	-27.1122	77.03
3264.88	-3.01335	-122.852	-33.3753	56.101
3265.05	-1.16518	-119.148	-37.367	44.4145
3265.22	0.70247	-125.43	-38.0259	49.3782
3265.4	2.55845	-137.114	-35.3855	66.3428
3265.57	4.37181	-146.65	-30.4292	85.7917
3265.75	6.11229	-151.175	-24.4768	102.221
3265.92	7.75087	-151.505	-18.6227	114.26
3266.1	9.2602	-149.56	-13.5178	122.524
3266.27	10.6151	-146.924	-9.42666	128.071
3266.44	11.793	-144.49	-6.36508	131.76
3266.62	12.7743	-142.601	-4.21251	134.176
3266.79	13.5425	-141.286	-2.78652	135.712
3266.97	14.0849	-140.442	-1.89418	136.653
3267.14	14.3923	-139.936	-1.36627	137.204
3267.31	14.4598	-139.655	-1.07497	137.505
3267.49	14.2861	-139.521	-0.937194	137.647
3267.66	13.8742	-139.492	-0.90941	137.673
3267.84	13.2308	-139.554	-0.980007	137.594
3268.01	12.3669	-139.718	-1.16365	137.391
3268.18	11.2967	-140.009	-1.49957	137.01
3268.36	10.0381	-140.46	-2.05539	136.349
3268.53	8.61213	-141.093	-2.93951	135.214
3268.71	7.04255	-141.887	-4.32514	133.237
3268.88	5.35555	-142.699	-6.47645	129.746
3269.05	3.57927	-143.122	-9.73396	123.654
3269.23	1.74333	-142.33	-14.3832	113.564
3269.4	-0.121639	-139.187	-20.3715	98.4436
3269.58	-1.98453	-133.152	-27.0045	79.1428
3269.75	-3.81427	-126.27	-32.933	60.4041
3269.93	-5.58033	-124.16	-36.6354	50.8889
3270.1	-7.25326	-130.515	-37.1668	56.1814
3270.27	-8.80516	-140.903	-34.608	71.687
3270.45	-10.2101	-149.005	-29.8881	89.2285
3270.62	-11.4447	-152.504	-24.2115	104.081
3270.8	-12.4884	-152.236	-18.5712	115.094
3270.97	-13.3237	-149.971	-13.5779	122.815
3271.14	-13.9367	-147.158	-9.51193	128.134
3271.32	-14.3172	-144.616	-6.42915	131.757
3271.49	-14.4588	-142.657	-4.24395	134.169
3271.67	-14.3592	-141.302	-2.79293	135.716
3271.84	-14.02	-140.441	-1.8882	136.664
3272.01	-13.4469	-139.931	-1.35839	137.214
3272.19	-12.6495	-139.654	-1.07204	137.51
3272.36	-11.641	-139.529	-0.943947	137.642
3272.54	-10.4383	-139.515	-0.930656	137.653
3272.71	-9.0614	-139.599	-1.02245	137.554
3272.88	-7.53333	-139.794	-1.23684	137.32
3273.06	-5.87954	-140.13	-1.61558	136.898
3273.23	-4.12764	-140.639	-2.22665	136.186
3273.41	-2.30683	-141.344	-3.1742	134.996
3273.58	-0.447491	-142.22	-4.6199	132.98
3273.76	1.41936	-143.115	-6.80765	129.5
3273.93	3.26258	-143.63	-10.0498	123.53
3274.1	5.05144	-142.988	-14.6008	113.787
3274.28	6.75608	-140.199	-20.3865	99.4264
3274.45	8.34807	-134.998	-26.7247	81.5484
3274.63	9.80087	-129.577	-32.3331	64.9112
3274.8	11.0902	-128.832	-35.8026	57.2273
3274.97	12.1947	-135.17	-36.2889	62.5924
3275.15	13.0957	-144.398	-33.8931	76.6121
3275.32	13.7784	-151.228	-29.4645	92.299
3275.5	14.2313	-153.816	-24.082	105.652
3275.67	14.4468	-153.006	-18.6432	115.72
3275.84	14.4215	-150.435	-13.7328	122.97
3276.02	14.1556	-147.436	-9.66078	128.114
3276.19	13.6536	-144.769	-6.53098	131.707
3276.37	12.924	-142.729	-4.29548	134.138
3276.54	11.9788	-141.326	-2.809	135.708
3276.71	10.8338	-140.442	-1.8865	136.669
3276.89	9.50823	-139.927	-1.35238	137.222
3277.06	8.02407	-139.654	-1.07017	137.514
3277.24	6.40612	-139.539	-0.95186	137.635
3277.41	4.68135	-139.539	-0.953973	137.631
3277.58	2.87855	-139.647	-1.06887	137.509
3277.76	1.02779	-139.877	-1.31703	137.243
3277.93	-0.840071	-140.261	-1.74245	136.776
3278.11	-2.69387	-140.832	-2.41214	136.008
3278.28	-4.50268	-141.61	-3.42291	134.764
3278.46	-6.23634	-142.557	-4.92027	132.716
3278.63	-7.86592	-143.515	-7.12309	129.269
3278.8	-9.36425	-144.093	-10.314	123.465
3278.98	-10.7063	-143.575	-14.7219	114.131
3279.15	-11.8698	-141.138	-20.2656	100.606
3279.33	-12.8352	-136.773	-26.2943	84.1845
3279.5	-13.5864	-132.729	-31.608	69.513
3279.67	-14.111	-133.147	-34.91	63.3274
3279.85	-14.4001	-139.415	-35.4382	68.5384
3280.02	-14.449	-147.623	-33.2843	81.054
3280.2	-14.2569	-153.343	-29.1944	94.9539
3280.37	-13.8269	-155.129	-24.1146	106.9
3280.54	-13.1661	-153.83	-18.8557	116.118
3280.72	-12.2858	-150.961	-13.9923	122.976
3280.89	-11.2004	-147.762	-9.87815	128.006
3281.07	-9.92816	-144.954	-6.67281	131.608
3281.24	-8.49026	-142.817	-4.36805	134.081
3281.41	-6.9107	-141.358	-2.83523	135.687
3281.59	-5.21581	-140.447	-1.88952	136.668
3281.76	-3.43387	-139.925	-1.34881	137.227
3281.94	-1.5946	-139.655	-1.07012	137.515
3282.11	0.27131	-139.55	-0.962035	137.626
3282.29	2.13275	-139.568	-0.981021	137.606
3282.46	3.95866	-139.702	-1.12179	137.458
3282.63	5.71859	-139.971	-1.40803	137.154
3282.81	7.38318	-140.408	-1.88563	136.637
3282.98	8.92467	-141.047	-2.619	135.809
3283.16	10.3173	-141.897	-3.69417	134.508
3283.33	11.538	-142.907	-5.23537	132.437
3283.5	12.5662	-143.908	-7.43172	129.044
3283.68	13.3848	-144.516	-10.5355	123.445
3283.85	13.9803	-144.094	-14.7572	114.58
3284.03	14.3425	-141.998	-20.0246	101.949
3284.2	14.4656	-138.457	-25.738	86.9807
3284.37	14.3475	-135.689	-30.7929	74.1036
3284.55	13.9901	-137.101	-34.0015	69.098
3284.72	13.3993	-143.278	-34.6614	73.9556
3284.9	12.5852	-150.609	-32.8249	84.9589
3285.07	11.5611	-155.378	-29.1128	97.152
3285.24	10.3442	-156.467	-24.334	107.799
3285.42	8.95487	-154.721	-19.2241	116.273
3285.59	7.41619	-151.556	-14.3648	122.827
3285.77	5.75386	-148.141	-10.1678	127.805
3285.94	3.9956	-145.169	-6.85606	131.457
3286.12	2.17074	-142.921	-4.46211	133.997
3286.29	0.309717	-141.396	-2.87181	135.653
3286.46	-1.55642	-140.455	-1.89756	136.66
3286.64	-3.39655	-139.924	-1.34816	137.228
3286.81	-5.17997	-139.658	-1.07266	137.513
3286.99	-6.87693	-139.565	-0.975666	137.614
3287.16	-8.45914	-139.602	-1.01368	137.575
3287.33	-9.9002	-139.766	-1.18416	137.397
3287.51	-11.1761	-140.079	-1.51433	137.051
3287.68	-12.2655	-140.578	-2.05155	136.475
3287.86	-13.1502	-141.291	-2.85573	135.579
3288.03	-13.8156	-142.215	-3.99816	134.219
3288.2	-14.2504	-143.282	-5.57622	132.129
3288.38	-14.4475	-144.301	-7.74455	128.812
3288.55	-14.4036	-144.907	-10.7254	123.456
3288.73	-14.1193	-144.549	-14.7197	115.11
3288.9	-13.5995	-142.776	-19.6821	103.412
3289.07	-12.8528	-140.029	-25.0836	89.8618
3289.25	-11.8917	-138.435	-29.9259	78.583
3289.42	-10.7321	-140.703	-33.1225	74.4582
3289.6	-9.3935	-146.8	-34.0055	78.7886
3289.77	-7.89814	-153.396	-32.5571	88.282
3289.94	-6.27099	-157.365	-29.2528	98.8593
3290.12	-4.53919	-157.852	-24.7629	108.326
3290.29	-2.73162	-155.694	-19.7616	116.171
3290.47	-0.878435	-152.228	-14.8568	122.514
3290.64	0.989449	-148.573	-10.5324	127.508
3290.82	2.84088	-145.416	-7.08131	131.254
3290.99	4.64497	-143.041	-4.57754	133.885
3291.16	6.37163	-141.442	-2.91863	135.604
3291.34	7.99206	-140.467	-1.91072	136.645
3291.51	9.47922	-139.926	-1.35084	137.224
3291.69	10.8083	-139.664	-1.07857	137.507
3291.86	11.9572	-139.584	-0.994045	137.596
3292.03	12.9066	-139.643	-1.05406	137.535
3292.21	13.6409	-139.843	-1.2594	137.324
3292.38	14.1476	-140.208	-1.64118	136.926
3292.56	14.4184	-140.777	-2.24777	136.282
3292.73	14.4487	-141.573	-3.13235	135.309
3292.9	14.2381	-142.577	-4.34692	133.883
3293.08	13.79	-143.691	-5.95591	131.779
3293.25	13.112	-144.706	-8.07478	128.556
3293.43	12.2153	-145.273	-10.897	123.479
3293.6	11.1148	-144.944	-14.6253	115.693
3293.77	9.82908	-143.467	-19.2596	104.948
3293.95	8.3794	-141.473	-24.3615	92.7504
3294.12	6.79001	-140.952	-29.0468	82.8587
3294.3	5.0874	-143.975	-32.3191	79.3371
3294.47	3.29998	-150.024	-33.517	82.9901
3294.65	1.45757	-156.03	-32.5217	90.9868
3294.82	-0.409113	-159.34	-29.6453	100.049
3294.99	-2.26892	-159.308	-25.4213	108.465
3295.17	-4.09083	-156.763	-20.4794	115.804
3295.34	-5.84445	-152.982	-15.473	122.036
3295.52	-7.50054	-149.06	-10.973	127.114
3295.69	-9.03146	-145.694	-7.34819	130.997
3295.86	-10.4117	-143.174	-4.71367	133.746
3296.04	-11.6182	-141.492	-2.97523	135.542
3296.21	-12.6309	-140.48	-1.92892	136.622
3296.39	-13.4328	-139.93	-1.35719	137.216
3296.56	-14.0106	-139.674	-1.08862	137.496
3296.73	-14.3546	-139.609	-1.01857	137.572
3296.91	-14.4592	-139.695	-1.10456	137.486
3297.08	-14.3225	-139.936	-1.35143	137.233
3297.26	-13.9469	-140.364	-1.79469	136.774
3297.43	-13.3386	-141.016	-2.48311	136.049
3297.6	-12.5077	-141.906	-3.46053	134.985
3297.78	-11.4682	-142.994	-4.75446	133.485
3297.95	-10.2373	-144.148	-6.38967	131.368
3298.13	-8.83563	-145.132	-8.43786	128.257
3298.3	-7.2865	-145.621	-11.0663	123.488
3298.48	-5.61578	-145.278	-14.4921	116.294
3298.65	-3.85134	-144.064	-18.7811	106.502
3298.82	-2.02261	-142.778	-23.6044	95.5689
3299	-0.160088	-143.241	-28.197	86.8464
3299.17	1.70515	-146.949	-31.6378	83.6731
3299.35	3.542	-153.003	-33.2415	86.5204
3299.52	5.31981	-158.558	-32.7573	93.0435
3299.69	7.00893	-161.336	-30.3185	100.699
3299.87	8.5812	-160.855	-26.3267	108.202
3300.04	10.0104	-157.936	-21.3859	115.165
3300.22	11.2726	-153.82	-16.2161	121.388
3300.39	12.3469	-149.602	-11.4893	126.623
3300.56	13.2152	-145.998	-7.65538	130.688
3300.74	13.8632	-143.318	-4.86922	133.58
3300.91	14.28	-141.547	-3.04081	135.465
3301.09	14.4586	-140.495	-1.95192	136.592
3301.26	14.3961	-139.936	-1.36744	137.201
3301.43	14.0935	-139.687	-1.10358	137.48
3301.61	13.5559	-139.641	-1.05076	137.54
3301.78	12.7922	-139.759	-1.16787	137.423
3301.96	11.8152	-140.05	-1.46477	137.121
3302.13	10.6412	-140.552	-1.98192	136.588
3302.3	9.28965	-141.302	-2.76779	135.767
3302.48	7.78324	-142.302	-3.85378	134.595
3302.65	6.14705	-143.482	-5.23693	133.008
3302.83	4.40838	-144.667	-6.89503	130.877
3303	2.59622	-145.593	-8.85148	127.891
3303.18	0.7408	-145.958	-11.2512	123.456
3303.35	-1.12692	-145.556	-14.3403	116.875
3303.52	-2.9758	-144.564	-18.2727	108.018
3303.7	-4.77499	-143.935	-22.8465	98.2417
3303.87	-6.49449	-145.308	-27.4188	90.4702
3304.05	-8.1056	-149.663	-31.1248	87.4134
3304.22	-9.58146	-155.792	-33.2227	89.3467
3304.39	-10.8974	-161.028	-33.2998	94.4287
3304.57	-12.0316	-163.388	-31.2971	100.794
3304.74	-12.965	-162.513	-27.4931	107.527
3304.92	-13.6821	-159.223	-22.4868	114.249
3305.09	-14.171	-154.744	-17.0868	120.57
3305.26	-14.4234	-150.194	-12.0795	126.035
3305.44	-14.4352	-146.327	-8.00056	130.326
3305.61	-14.2061	-143.47	-5.04234	133.386
3305.79	-13.74	-141.603	-3.11425	135.374
3305.96	-13.0447	-140.511	-1.97927	136.553
3306.13	-12.1318	-139.944	-1.38175	137.181
3306.31	-11.0164	-139.705	-1.12422	137.457
3306.48	-9.71723	-139.682	-1.09226	137.497
3306.66	-8.25592	-139.838	-1.24703	137.344
3306.83	-6.65685	-140.191	-1.60458	136.982
3307.01	-4.94669	-140.782	-2.21103	136.36
3307.18	-3.15397	-141.649	-3.11361	135.421
3307.35	-1.30859	-142.776	-4.32761	134.121
3307.53	0.558662	-144.056	-5.81277	132.431
3307.7	2.41665	-145.266	-7.49185	130.282
3307.88	4.23437	-146.102	-9.33559	127.431
3308.05	5.98151	-146.292	-11.4717	123.349
3308.22	7.62893	-145.777	-14.1922	117.392
3308.4	9.14914	-144.962	-17.762	109.438
3308.57	10.5168	-144.943	-22.1234	100.697
3308.75	11.7091	-147.172	-26.7546	93.6628
3308.92	12.7061	-152.163	-30.825	90.5131
3309.09	13.4912	-158.446	-33.5022	91.4418
3309.27	14.0513	-163.487	-34.1818	95.124
3309.44	14.3771	-165.525	-32.6026	100.32
3309.62	14.4631	-164.297	-28.9311	106.435
3309.79	14.308	-160.626	-23.7848	113.057
3309.96	13.9142	-155.751	-18.0831	119.585
3310.14	13.2883	-150.833	-12.7401	125.353
3310.31	12.4409	-146.675	-8.38039	129.914
3310.49	11.386	-143.627	-5.23056	133.165
3310.66	10.1412	-141.658	-3.19408	135.27
3310.84	8.72728	-140.527	-2.01033	136.506
3311.01	7.16786	-139.954	-1.40016	137.154
3311.18	5.48892	-139.729	-1.15131	137.426
3311.36	3.71847	-139.733	-1.14485	137.444
3311.53	1.88605	-139.936	-1.34544	137.246
3311.71	0.022212	-140.363	-1.77676	136.81
3311.88	-1.84195	-141.062	-2.49132	136.08
3312.05	-3.67533	-142.068	-3.53403	135
3312.23	-5.44736	-143.344	-4.89965	133.545
3312.4	-7.12847	-144.737	-6.50281	131.732
3312.58	-8.69064	-145.961	-8.20237	129.556
3312.75	-10.1078	-146.671	-9.91231	126.846
3312.92	-11.3563	-146.631	-11.7499	123.131
3313.1	-12.4153	-145.943	-14.072	117.798
3313.27	-13.2672	-145.257	-17.2784	110.701
3313.45	-13.8977	-145.808	-21.4715	102.865
3313.62	-14.2964	-148.858	-26.2466	96.3646
3313.79	-14.4565	-154.498	-30.782	92.9343
3313.97	-14.3755	-161.021	-34.1185	92.7839
3314.14	-14.0546	-165.979	-35.432	95.1152
3314.32	-13.4992	-167.775	-34.2521	99.2706
3314.49	-12.7186	-166.217	-30.6473	104.923
3314.67	-11.7258	-162.148	-25.2793	111.589
3314.84	-10.5374	-156.838	-19.2008	118.436
3315.01	-9.17313	-151.511	-13.4662	124.579
3315.19	-7.65582	-147.034	-8.79056	129.452
3315.36	-6.01075	-143.781	-5.43084	132.92
3315.54	-4.26538	-141.708	-3.27849	135.151
3315.71	-2.44881	-140.539	-2.04428	136.451
3315.88	-0.591341	-139.966	-1.42262	137.121
3316.06	1.27604	-139.758	-1.1856	137.387
3316.23	3.12218	-139.797	-1.21045	137.376
3316.41	4.9163	-140.057	-1.46691	137.123
3316.58	6.62845	-140.574	-1.98798	136.598
3316.75	8.23009	-141.403	-2.83344	135.736
3316.93	9.6945	-142.574	-4.04434	134.486
3317.1	10.9972	-144.025	-5.5898	132.845
3317.28	12.1166	-145.544	-7.33031	130.883
3317.45	13.0339	-146.772	-9.05121	128.669
3317.62	13.7338	-147.314	-10.6059	126.103
3317.8	14.2047	-146.981	-12.1095	122.762
3317.97	14.4387	-146.054	-14.0051	118.044
3318.15	14.4319	-145.45	-16.852	111.746
3318.32	14.1845	-146.538	-20.9273	104.684
3318.49	13.7004	-150.396	-25.9361	98.5236
3318.67	12.9879	-156.719	-31.0368	94.6452
3318.84	12.0588	-163.569	-35.1067	93.3554
3319.02	10.9286	-168.542	-37.075	94.3922
3319.19	9.61617	-170.156	-36.2579	97.6404
3319.37	8.14336	-168.28	-32.644	102.992
3319.54	6.53478	-163.784	-26.9663	109.852
3319.71	4.81724	-157.994	-20.4333	117.127
3319.89	3.01939	-152.219	-14.2509	123.717
3320.06	1.17123	-147.396	-9.22574	128.944
3320.24	-0.696424	-143.928	-5.63959	132.649
3320.41	-2.55241	-141.75	-3.36538	135.019
3320.58	-4.36577	-140.548	-2.08012	136.388
3320.76	-6.10626	-139.978	-1.44897	137.08
3320.93	-7.74484	-139.793	-1.22781	137.338
3321.11	-9.25419	-139.875	-1.29113	137.292
3321.28	-10.6091	-140.205	-1.61568	136.973
3321.45	-11.7871	-140.83	-2.24581	136.339
3321.63	-12.7683	-141.817	-3.2494	135.318
3321.8	-13.5365	-143.185	-4.66181	133.862
3321.98	-14.0789	-144.839	-6.42031	131.999
3322.15	-14.3864	-146.5	-8.32105	129.858
3322.32	-14.4539	-147.719	-10.0653	127.588
3322.5	-14.2802	-148.047	-11.4423	125.163
3322.67	-13.8683	-147.348	-12.5758	122.197
3322.85	-13.225	-146.113	-14.0179	118.077
3323.02	-12.3611	-145.542	-16.5137	112.514
3323.2	-11.2909	-147.148	-20.5272	106.094
3323.37	-10.0323	-151.82	-25.8628	100.095
3323.54	-8.60636	-158.875	-31.6277	95.6195
3323.72	-7.03679	-166.138	-36.4977	93.1426
3323.89	-5.3498	-171.208	-39.1303	92.9478
3324.07	-3.57352	-172.684	-38.6276	95.4284
3324.24	-1.73759	-170.486	-34.9194	100.647
3324.41	0.12738	-165.527	-28.8382	107.851
3324.59	1.99027	-159.209	-21.7713	115.667
3324.76	3.82001	-152.944	-15.086	122.772
3324.94	5.58608	-147.751	-9.67969	128.392
3325.11	7.25902	-144.06	-5.8527	132.354
3325.28	8.81093	-141.78	-3.45235	134.875
3325.46	10.2159	-140.55	-2.11663	136.317
3325.63	11.4505	-139.99	-1.4789	137.032
3325.81	12.4942	-139.836	-1.27866	137.279
3325.98	13.3295	-139.969	-1.38911	137.191
3326.15	13.9425	-140.383	-1.79646	136.79
3326.33	14.323	-141.141	-2.55871	136.024
3326.5	14.4647	-142.315	-3.75272	134.81
3326.68	14.3651	-143.918	-5.40571	133.107
3326.85	14.0259	-145.81	-7.41587	130.978
3327.03	13.4529	-147.628	-9.50326	128.621
3327.2	12.6554	-148.822	-11.2736	126.275
3327.37	11.647	-148.883	-12.4495	123.984
3327.55	10.4443	-147.738	-13.1751	121.388
3327.72	9.0674	-146.118	-14.1378	117.842
3327.9	7.53934	-145.536	-16.2943	112.948
3328.07	5.88556	-147.655	-20.3067	107.041
3328.24	4.13366	-153.169	-26.0646	101.039
3328.42	2.31285	-161.014	-32.5896	95.8353
3328.59	0.453519	-168.77	-38.3176	92.1349
3328.77	-1.41333	-174.002	-41.6119	90.778
3328.94	-3.25656	-175.364	-41.3633	92.6369
3329.11	-5.04542	-172.829	-37.4666	97.8957
3329.29	-6.75007	-167.365	-30.8839	105.597
3329.46	-8.34208	-160.469	-23.2032	114.062
3329.64	-9.79489	-153.672	-15.9617	121.748
3329.81	-11.0843	-148.087	-10.1453	127.796
3329.98	-12.1887	-144.168	-6.06559	132.037
3330.16	-13.0898	-141.791	-3.53674	134.718
3330.33	-13.7725	-140.542	-2.15244	136.238
3330.51	-14.2254	-140	-1.51199	136.976
3330.68	-14.4409	-139.885	-1.33878	137.208
3330.85	-14.4156	-140.082	-1.50677	137.068
3331.03	-14.1497	-140.598	-2.01447	136.569
3331.2	-13.6478	-141.515	-2.93617	135.642
3331.38	-12.9182	-142.914	-4.35848	134.197
3331.55	-11.973	-144.794	-6.29746	132.199
3331.73	-10.8281	-146.961	-8.60358	129.754
3331.9	-9.50247	-148.954	-10.9076	127.139
3332.07	-8.01832	-150.104	-12.7074	124.689
3332.25	-6.40038	-149.834	-13.6564	122.521
3332.42	-4.67562	-148.155	-13.9346	120.286
3332.6	-2.87283	-146.07	-14.3921	117.285
3332.77	-1.02207	-145.439	-16.2244	112.99
3332.94	0.845794	-148.078	-20.3	107.478
3333.12	2.69959	-154.477	-26.5766	101.324
3333.29	4.50841	-163.181	-33.9529	95.2752
3333.47	6.24208	-171.499	-40.5872	90.3242
3333.64	7.87167	-176.938	-44.5279	87.8818
3333.81	9.37	-178.195	-44.4613	89.2718
3333.99	10.7121	-175.297	-40.2738	94.7493
3334.16	11.8756	-169.28	-33.0884	103.104
3334.34	12.841	-161.753	-24.7146	112.324
[truncated: 28,001 more rows]

## Sheet: bplanetphasedmodel
Phase	RV
1.83087e-05	-0.00166375
0.000200599	-0.0182288
0.000233477	-0.0212164
0.000415767	-0.0377814
0.000448645	-0.0407691
0.000630935	-0.057334
0.000663813	-0.0603216
0.000846103	-0.0768865
0.00087898	-0.0798741
0.00106127	-0.0964388
0.00109415	-0.0994264
0.00127644	-0.115991
0.00130932	-0.118979
0.00149161	-0.135543
0.00152448	-0.13853
0.00170677	-0.155095
0.00173965	-0.158082
0.00192194	-0.174646
0.00195482	-0.177633
0.00213711	-0.194197
0.00216999	-0.197185
0.00235228	-0.213748
0.00238516	-0.216735
0.00256745	-0.233298
0.00260032	-0.236286
0.00278261	-0.252848
0.00281549	-0.255835
0.00299778	-0.272398
0.00303066	-0.275385
0.00321295	-0.291947
0.00324583	-0.294934
0.00342812	-0.311495
0.003461	-0.314482
0.00364329	-0.331043
0.00367616	-0.33403
0.00370904	-0.337017
0.00385845	-0.35059
0.00389133	-0.353577
0.00392421	-0.356564
0.00407362	-0.370137
0.0041065	-0.373123
0.00413938	-0.37611
0.00432167	-0.392669
0.00435454	-0.395656
0.00453684	-0.412214
0.00456971	-0.415201
0.004752	-0.431759
0.00478488	-0.434745
0.00496717	-0.451302
0.00500005	-0.454289
0.00518234	-0.470845
0.00521522	-0.473831
0.00539751	-0.490387
0.00543038	-0.493373
0.00561267	-0.509928
0.00564555	-0.512914
0.00582784	-0.529468
0.00586072	-0.532454
0.00604301	-0.549007
0.00607589	-0.551993
0.00625818	-0.568545
0.00629106	-0.571531
0.00647335	-0.588082
0.00650622	-0.591067
0.00668851	-0.607618
0.00672139	-0.610603
0.00690368	-0.627153
0.00693656	-0.630138
0.00711885	-0.646687
0.00715173	-0.649671
0.00733402	-0.666219
0.0073669	-0.669204
0.00754919	-0.685751
0.00758206	-0.688735
0.00776435	-0.705281
0.00779723	-0.708265
0.00797952	-0.72481
0.0080124	-0.727793
0.00804528	-0.730777
0.00819469	-0.744337
0.00822757	-0.747321
0.00826045	-0.750304
0.00840986	-0.763863
0.00844274	-0.766847
0.00847561	-0.76983
0.0086579	-0.786371
0.00869078	-0.789354
0.00887307	-0.805894
0.00890595	-0.808877
0.00908824	-0.825416
0.00912112	-0.828398
0.00930341	-0.844936
0.00933628	-0.847918
0.00951858	-0.864454
0.00955145	-0.867437
0.00973374	-0.883971
0.00976662	-0.886953
0.00994891	-0.903486
0.00998179	-0.906468
0.0101641	-0.923
0.010197	-0.925982
0.0103792	-0.942512
0.0104121	-0.945493
0.0105944	-0.962022
0.0106273	-0.965003
0.0108096	-0.981531
0.0108425	-0.984512
0.0110248	-1.00104
0.0110576	-1.00402
0.0112399	-1.02054
0.0112728	-1.02352
0.0114551	-1.04005
0.011488	-1.04303
0.0116703	-1.05955
0.0117031	-1.06253
0.0118854	-1.07905
0.0119183	-1.08203
0.0121006	-1.09854
0.0121335	-1.10152
0.0123158	-1.11804
0.0123486	-1.12102
0.0123815	-1.124
0.0125309	-1.13753
0.0125638	-1.14051
0.0125967	-1.14349
0.0127461	-1.15702
0.012779	-1.16
0.0128118	-1.16298
0.0129613	-1.17651
0.0129941	-1.17949
0.013027	-1.18247
0.0132093	-1.19898
0.0132422	-1.20195
0.0134245	-1.21846
0.0134574	-1.22144
0.0136396	-1.23794
0.0136725	-1.24092
0.0138548	-1.25742
0.0138877	-1.2604
0.01407	-1.2769
0.0141029	-1.27988
0.0142851	-1.29637
0.014318	-1.29935
0.0145003	-1.31585
0.0145332	-1.31882
0.0147155	-1.33532
0.0147484	-1.33829
0.0149307	-1.35479
0.0149635	-1.35776
0.0151458	-1.37425
0.0151787	-1.37723
0.015361	-1.39371
0.0153939	-1.39669
0.0155762	-1.41317
0.015609	-1.41615
0.0157913	-1.43263
0.0158242	-1.43561
0.0160065	-1.45209
0.0160394	-1.45506
0.0162217	-1.47154
0.0162545	-1.47451
0.0164368	-1.49099
0.0164697	-1.49396
0.016652	-1.51044
0.0166849	-1.51341
0.0168672	-1.52988
0.0169	-1.53285
0.0169329	-1.53582
0.0170823	-1.54932
0.0171152	-1.55229
0.0171481	-1.55526
0.0172975	-1.56876
0.0173304	-1.57173
0.0173633	-1.5747
0.0175455	-1.59117
0.0175784	-1.59414
0.0177607	-1.6106
0.0177936	-1.61357
0.0179759	-1.63003
0.0180088	-1.633
0.018191	-1.64946
0.0182239	-1.65242
0.0184062	-1.66888
0.0184391	-1.67185
0.0186214	-1.6883
0.0186543	-1.69127
0.0188366	-1.70772
0.0188694	-1.71068
0.0190517	-1.72713
0.0190846	-1.7301
0.0192669	-1.74654
0.0192998	-1.74951
0.0194821	-1.76595
0.0195149	-1.76892
0.0196972	-1.78536
0.0197301	-1.78832
0.0199124	-1.80476
0.0199453	-1.80772
0.0201276	-1.82416
0.0201604	-1.82712
0.0203427	-1.84355
0.0203756	-1.84651
0.0205579	-1.86294
0.0205908	-1.8659
0.0207731	-1.88233
0.0208059	-1.88529
0.0209882	-1.90171
0.0210211	-1.90468
0.0212034	-1.9211
0.0212363	-1.92406
0.0212692	-1.92702
0.0214186	-1.94047
0.0214514	-1.94343
0.0214843	-1.94639
0.0216337	-1.95985
0.0216666	-1.96281
0.0216995	-1.96577
0.0218489	-1.97922
0.0218818	-1.98218
0.0219147	-1.98514
0.0220969	-2.00154
0.0221298	-2.0045
0.0223121	-2.02091
0.022345	-2.02386
0.0225273	-2.04027
0.0225602	-2.04322
0.0227425	-2.05962
0.0227753	-2.06258
0.0229576	-2.07897
0.0229905	-2.08193
0.0231728	-2.09832
0.0232057	-2.10128
0.023388	-2.11766
0.0234208	-2.12062
0.0236031	-2.137
0.023636	-2.13996
0.0238183	-2.15634
0.0238512	-2.15929
0.0240335	-2.17567
0.0240663	-2.17863
0.0242486	-2.195
0.0242815	-2.19795
0.0244638	-2.21432
0.0244967	-2.21728
0.024679	-2.23364
0.0247118	-2.2366
0.0248941	-2.25296
0.024927	-2.25591
0.0251093	-2.27227
0.0251422	-2.27522
0.0253245	-2.29158
0.0253573	-2.29453
0.0255396	-2.31088
0.0255725	-2.31383
0.0257548	-2.33018
0.0257877	-2.33313
0.0258206	-2.33608
0.02597	-2.34948
0.0260028	-2.35243
0.0260357	-2.35537
0.0261851	-2.36877
0.026218	-2.37172
0.0262509	-2.37466
0.0264332	-2.391
0.0264661	-2.39395
0.0266484	-2.41028
0.0266812	-2.41323
0.0268635	-2.42956
0.0268964	-2.43251
0.0270787	-2.44883
0.0271116	-2.45178
0.0272939	-2.4681
0.0273267	-2.47105
0.027509	-2.48737
0.0275419	-2.49031
0.0277242	-2.50662
0.0277571	-2.50957
0.0279394	-2.52588
0.0279722	-2.52882
0.0281545	-2.54513
0.0281874	-2.54807
0.0283697	-2.56437
0.0284026	-2.56731
0.0285849	-2.58361
0.0286177	-2.58655
0.0288	-2.60285
0.0288329	-2.60579
0.0290152	-2.62208
0.0290481	-2.62502
0.0292304	-2.64131
0.0292632	-2.64424
0.0294455	-2.66053
0.0294784	-2.66347
0.0296607	-2.67975
0.0296936	-2.68268
0.0298759	-2.69896
0.0299087	-2.70189
0.030091	-2.71816
0.0301239	-2.7211
0.0301568	-2.72403
0.0303062	-2.73737
0.0303391	-2.7403
0.030372	-2.74323
0.0305214	-2.75656
0.0305543	-2.7595
0.0305871	-2.76243
0.0307694	-2.77869
0.0308023	-2.78162
0.0309846	-2.79787
0.0310175	-2.8008
0.0311998	-2.81705
0.0312326	-2.81998
0.0314149	-2.83623
0.0314478	-2.83916
0.0316301	-2.8554
0.031663	-2.85833
0.0318453	-2.87456
0.0318781	-2.87749
0.0320604	-2.89372
0.0320933	-2.89665
0.0322756	-2.91288
0.0323085	-2.91581
0.0324908	-2.93203
0.0325236	-2.93495
0.0327059	-2.95117
0.0327388	-2.9541
0.0329211	-2.97031
0.032954	-2.97323
0.0331363	-2.98944
0.0331691	-2.99237
0.0333514	-3.00857
0.0333843	-3.01149
0.0335666	-3.02769
0.0335995	-3.03062
0.0337818	-3.04681
0.0338146	-3.04973
0.0339969	-3.06592
0.0340298	-3.06884
0.0342121	-3.08503
0.034245	-3.08795
0.0344273	-3.10413
0.0344602	-3.10704
0.034493	-3.10996
0.0346424	-3.12322
0.0346753	-3.12614
0.0347082	-3.12906
0.0348576	-3.14231
0.0348905	-3.14523
0.0349234	-3.14814
0.0350728	-3.16139
0.0351057	-3.16431
0.0351385	-3.16722
0.0353208	-3.18338
0.0353537	-3.1863
0.035536	-3.20245
0.0355689	-3.20537
0.0357512	-3.22152
0.035784	-3.22443
0.0359663	-3.24058
0.0359992	-3.24349
0.0361815	-3.25963
0.0362144	-3.26254
0.0363967	-3.27868
0.0364295	-3.28159
0.0366118	-3.29772
0.0366447	-3.30063
0.036827	-3.31675
0.0368599	-3.31966
0.0370422	-3.33578
0.037075	-3.33869
0.0372573	-3.3548
0.0372902	-3.35771
0.0374725	-3.37382
0.0375054	-3.37672
0.0376877	-3.39283
0.0377205	-3.39573
0.0379028	-3.41183
0.0379357	-3.41474
0.038118	-3.43083
0.0381509	-3.43373
0.0383332	-3.44982
0.0383661	-3.45272
0.0385483	-3.46881
0.0385812	-3.47171
0.0387635	-3.48779
0.0387964	-3.49069
0.0389787	-3.50676
0.0390116	-3.50966
0.0390444	-3.51255
0.0391938	-3.52572
0.0392267	-3.52862
0.0392596	-3.53152
0.039409	-3.54468
0.0394419	-3.54758
0.0394748	-3.55048
0.0396571	-3.56653
0.0396899	-3.56943
0.0398722	-3.58548
0.0399051	-3.58837
0.0400874	-3.60442
0.0401203	-3.60731
0.0403026	-3.62335
0.0403354	-3.62624
0.0405177	-3.64228
0.0405506	-3.64517
0.0407329	-3.66119
0.0407658	-3.66408
0.0409481	-3.68011
0.0409809	-3.683
0.0411632	-3.69901
0.0411961	-3.7019
0.0413784	-3.71791
0.0414113	-3.7208
0.0415936	-3.7368
0.0416264	-3.73969
0.0418087	-3.75569
0.0418416	-3.75857
0.0420239	-3.77457
0.0420568	-3.77745
0.0422391	-3.79344
0.042272	-3.79632
0.0424542	-3.8123
0.0424871	-3.81519
0.0426694	-3.83116
0.0427023	-3.83404
0.0428846	-3.85001
0.0429175	-3.85289
0.0430997	-3.86886
0.0431326	-3.87173
0.0433149	-3.88769
0.0433478	-3.89057
0.0433807	-3.89345
0.0435301	-3.90652
0.043563	-3.9094
0.0435958	-3.91227
0.0437453	-3.92534
0.0437781	-3.92822
0.043811	-3.93109
0.0439604	-3.94416
0.0439933	-3.94703
0.0440262	-3.94991
0.0442085	-3.96584
0.0442413	-3.96871
0.0444236	-3.98464
0.0444565	-3.98751
0.0446388	-4.00343
0.0446717	-4.0063
0.044854	-4.02222
0.0448868	-4.02509
0.0450691	-4.04099
0.045102	-4.04386
0.0452843	-4.05977
0.0453172	-4.06263
0.0454995	-4.07853
0.0455324	-4.08139
0.0457146	-4.09728
0.0457475	-4.10015
0.0459298	-4.11603
0.0459627	-4.1189
0.046145	-4.13477
0.0461779	-4.13763
0.0463601	-4.1535
0.046393	-4.15637
0.0465753	-4.17223
0.0466082	-4.17509
0.0467905	-4.19095
0.0468234	-4.19381
0.0470056	-4.20966
0.0470385	-4.21252
0.0472208	-4.22836
0.0472537	-4.23122
0.047436	-4.24705
0.0474689	-4.24991
0.0476512	-4.26574
0.047684	-4.2686
0.0478663	-4.28442
0.0478992	-4.28727
0.0479321	-4.29013
0.0480815	-4.30309
0.0481144	-4.30594
0.0481472	-4.3088
0.0482967	-4.32175
0.0483295	-4.32461
0.0483624	-4.32746
0.0485447	-4.34326
0.0485776	-4.34611
0.0487599	-4.36191
0.0487927	-4.36475
0.048975	-4.38054
0.0490079	-4.38339
0.0491902	-4.39917
0.0492231	-4.40202
0.0494054	-4.4178
0.0494383	-4.42064
0.0496205	-4.43641
0.0496534	-4.43925
0.0498357	-4.45502
0.0498686	-4.45786
0.0500509	-4.47361
0.0500838	-4.47646
0.050266	-4.4922
0.0502989	-4.49504
0.0504812	-4.51079
0.0505141	-4.51362
0.0506964	-4.52936
0.0507293	-4.5322
0.0509115	-4.54792
0.0509444	-4.55076
0.0511267	-4.56648
0.0511596	-4.56931
0.0513419	-4.58503
0.0513748	-4.58786
0.0515571	-4.60357
0.0515899	-4.6064
0.0517722	-4.6221
0.0518051	-4.62493
0.0519874	-4.64062
0.0520203	-4.64345
0.0522026	-4.65914
0.0522354	-4.66197
0.0522683	-4.66479
0.0524177	-4.67764
0.0524506	-4.68047
0.0524835	-4.6833
0.0526329	-4.69614
0.0526658	-4.69897
0.0526986	-4.70179
0.0528481	-4.71463
0.0528809	-4.71745
0.0529138	-4.72028
0.0530961	-4.73593
0.053129	-4.73876
0.0533113	-4.7544
0.0533442	-4.75723
0.0535264	-4.77287
0.0535593	-4.77569
0.0537416	-4.79132
0.0537745	-4.79414
0.0539568	-4.80976
0.0539897	-4.81258
0.0541719	-4.8282
0.0542048	-4.83101
0.0543871	-4.84662
0.05442	-4.84944
0.0546023	-4.86504
0.0546352	-4.86786
0.0548174	-4.88345
0.0548503	-4.88626
0.0550326	-4.90185
0.0550655	-4.90466
0.0552478	-4.92024
0.0552807	-4.92305
0.055463	-4.93862
0.0554958	-4.94143
0.0556781	-4.957
0.055711	-4.9598
0.0558933	-4.97536
0.0559262	-4.97817
0.0561085	-4.99371
0.0561413	-4.99652
0.0563236	-5.01206
0.0563565	-5.01486
0.0565388	-5.0304
0.0565717	-5.0332
0.056754	-5.04872
0.0567868	-5.05152
0.0568197	-5.05432
0.0569691	-5.06704
0.057002	-5.06984
0.0570349	-5.07264
0.0571843	-5.08535
0.0572172	-5.08815
0.0572501	-5.09094
0.0574323	-5.10645
0.0574652	-5.10924
0.0576475	-5.12473
0.0576804	-5.12753
0.0578627	-5.14301
0.0578956	-5.14581
0.0580778	-5.16128
0.0581107	-5.16407
0.058293	-5.17954
0.0583259	-5.18233
0.0585082	-5.1978
0.0585411	-5.20058
0.0587233	-5.21604
0.0587562	-5.21882
0.0589385	-5.23427
0.0589714	-5.23705
0.0591537	-5.25249
0.0591866	-5.25527
0.0593689	-5.2707
0.0594017	-5.27349
0.059584	-5.28891
0.0596169	-5.29169
0.0597992	-5.3071
0.0598321	-5.30988
0.0600144	-5.32528
0.0600472	-5.32806
0.0602295	-5.34346
0.0602624	-5.34624
0.0604447	-5.36162
0.0604776	-5.3644
0.0606599	-5.37978
0.0606927	-5.38255
0.060875	-5.39792
0.0609079	-5.40069
0.0610902	-5.41606
0.0611231	-5.41883
0.061156	-5.4216
0.0613054	-5.43418
0.0613382	-5.43695
0.0613711	-5.43972
0.0615205	-5.4523
0.0615534	-5.45506
0.0615863	-5.45783
0.0617686	-5.47317
0.0618015	-5.47593
0.0619837	-5.49126
0.0620166	-5.49403
0.0621989	-5.50934
0.0622318	-5.51211
0.0624141	-5.52742
0.062447	-5.53018
0.0626292	-5.54548
0.0626621	-5.54824
0.0628444	-5.56353
0.0628773	-5.56629
0.0630596	-5.58158
0.0630925	-5.58433
0.0632748	-5.59961
0.0633076	-5.60237
0.0634899	-5.61763
0.0635228	-5.62039
0.0637051	-5.63565
0.063738	-5.6384
0.0639203	-5.65365
0.0639531	-5.6564
0.0641354	-5.67164
0.0641683	-5.67439
0.0643506	-5.68962
0.0643835	-5.69237
0.0645658	-5.70759
0.0645986	-5.71034
0.0647809	-5.72555
0.0648138	-5.7283
0.0649961	-5.7435
0.065029	-5.74624
0.0652113	-5.76144
0.0652441	-5.76418
0.0654264	-5.77937
0.0654593	-5.78211
0.0654922	-5.78485
0.0656416	-5.79729
0.0656745	-5.80003
0.0657074	-5.80276
0.0658568	-5.8152
0.0658896	-5.81793
0.0659225	-5.82067
0.0660719	-5.83309
0.0661048	-5.83583
0.0661377	-5.83856
0.06632	-5.85371
0.0663529	-5.85644
0.0665351	-5.87159
0.066568	-5.87432
0.0667503	-5.88945
0.0667832	-5.89218
0.0669655	-5.9073
0.0669984	-5.91003
0.0671807	-5.92514
0.0672135	-5.92787
0.0673958	-5.94298
0.0674287	-5.9457
0.067611	-5.9608
0.0676439	-5.96352
0.0678262	-5.97861
0.067859	-5.98133
0.0680413	-5.9964
0.0680742	-5.99912
0.0682565	-6.01419
0.0682894	-6.01691
0.0684717	-6.03197
0.0685045	-6.03468
0.0686868	-6.04973
0.0687197	-6.05245
0.068902	-6.06749
0.0689349	-6.0702
0.0691172	-6.08523
0.06915	-6.08794
0.0693323	-6.10296
0.0693652	-6.10567
0.0695475	-6.12068
0.0695804	-6.12339
0.0697627	-6.13839
0.0697955	-6.1411
0.0699778	-6.15609
0.0700107	-6.1588
0.0700436	-6.1615
0.070193	-6.17378
0.0702259	-6.17648
0.0702588	-6.17918
0.0704082	-6.19146
0.0704411	-6.19416
0.0704739	-6.19685
0.0706562	-6.21182
0.0706891	-6.21452
0.0708714	-6.22947
0.0709043	-6.23217
0.0710866	-6.24711
0.0711194	-6.2498
0.0713017	-6.26474
0.0713346	-6.26743
0.0715169	-6.28236
0.0715498	-6.28505
0.0717321	-6.29996
0.0717649	-6.30265
0.0719472	-6.31756
0.0719801	-6.32024
0.0721624	-6.33514
0.0721953	-6.33783
0.0723776	-6.35271
0.0724104	-6.35539
0.0725927	-6.37027
0.0726256	-6.37295
0.0728079	-6.38782
0.0728408	-6.3905
0.0730231	-6.40535
0.0730559	-6.40803
0.0732382	-6.42288
0.0732711	-6.42556
0.0734534	-6.44039
0.0734863	-6.44307
0.0736686	-6.45789
0.0737014	-6.46057
0.0738837	-6.47538
0.0739166	-6.47805
0.0740989	-6.49286
0.0741318	-6.49553
0.0743141	-6.51033
0.074347	-6.51299
0.0743798	-6.51566
0.0745292	-6.52778
0.0745621	-6.53045
0.074595	-6.53311
0.0747444	-6.54522
0.0747773	-6.54789
0.0748102	-6.55055
0.0749596	-6.56265
0.0749925	-6.56531
0.0750253	-6.56798
0.0752076	-6.58273
0.0752405	-6.58539
0.0754228	-6.60013
0.0754557	-6.60279
0.075638	-6.61753
0.0756708	-6.62018
0.0758531	-6.63491
0.075886	-6.63756
0.0760683	-6.65227
0.0761012	-6.65493
0.0762835	-6.66963
0.0763163	-6.67228
0.0764986	-6.68697
0.0765315	-6.68962
0.0767138	-6.7043
0.0767467	-6.70695
0.076929	-6.72162
0.0769618	-6.72427
0.0771441	-6.73893
0.077177	-6.74157
0.0773593	-6.75622
0.0773922	-6.75886
0.0775745	-6.7735
0.0776073	-6.77614
0.0777896	-6.79077
0.0778225	-6.79341
0.0780048	-6.80803
0.0780377	-6.81067
0.07822	-6.82528
0.0782529	-6.82791
0.0784351	-6.84251
0.078468	-6.84514
0.0786503	-6.85973
0.0786832	-6.86236
0.0788655	-6.87693
0.0788984	-6.87956
0.0789312	-6.88219
0.0790806	-6.89413
0.0791135	-6.89676
0.0791464	-6.89938
0.0792958	-6.91131
0.0793287	-6.91394
0.0793616	-6.91656
0.0795439	-6.9311
0.0795767	-6.93372
0.079759	-6.94826
0.0797919	-6.95088
0.0799742	-6.9654
0.0800071	-6.96802
0.0801894	-6.98253
0.0802222	-6.98515
0.0804045	-6.99965
0.0804374	-7.00226
0.0806197	-7.01675
0.0806526	-7.01936
0.0808349	-7.03384
0.0808677	-7.03645
0.08105	-7.05092
0.0810829	-7.05353
0.0812652	-7.06798
0.0812981	-7.07059
0.0814804	-7.08504
0.0815132	-7.08764
0.0816955	-7.10208
0.0817284	-7.10468
0.0819107	-7.1191
0.0819436	-7.1217
0.0821259	-7.13611
0.0821588	-7.13871
0.082341	-7.15311
0.0823739	-7.15571
0.0825562	-7.1701
0.0825891	-7.1727
0.0827714	-7.18708
0.0828043	-7.18967
0.0829865	-7.20404
0.0830194	-7.20663
0.0832017	-7.22099
0.0832346	-7.22357
0.0832675	-7.22616
0.0834169	-7.23792
0.0834498	-7.24051
0.0834826	-7.24309
0.083632	-7.25484
0.0836649	-7.25743
0.0836978	-7.26001
0.0838801	-7.27433
0.083913	-7.27691
0.0840953	-7.29122
0.0841281	-7.2938
0.0843104	-7.3081
0.0843433	-7.31068
0.0845256	-7.32497
0.0845585	-7.32755
0.0847408	-7.34182
0.0847736	-7.3444
0.0849559	-7.35866
0.0849888	-7.36123
0.0851711	-7.37549
0.085204	-7.37806
0.0853863	-7.3923
0.0854191	-7.39487
0.0856014	-7.4091
0.0856343	-7.41166
0.0858166	-7.42588
0.0858495	-7.42845
0.0860318	-7.44266
0.0860647	-7.44522
0.0862469	-7.45941
0.0862798	-7.46197
0.0864621	-7.47616
0.086495	-7.47872
0.0866773	-7.49289
0.0867102	-7.49544
0.0868924	-7.50961
0.0869253	-7.51216
0.0871076	-7.52631
0.0871405	-7.52886
0.0873228	-7.543
0.0873557	-7.54555
0.0875379	-7.55968
0.0875708	-7.56222
0.0876037	-7.56477
0.0877531	-7.57634
0.087786	-7.57888
0.0878189	-7.58143
0.0879683	-7.59299
0.0880012	-7.59553
0.088034	-7.59807
0.0881835	-7.60962
0.0882163	-7.61216
0.0882492	-7.6147
0.0884315	-7.62878
0.0884644	-7.63132
0.0886467	-7.64538
0.0886795	-7.64792
0.0888618	-7.66197
0.0888947	-7.66451
0.089077	-7.67855
0.0891099	-7.68108
0.0892922	-7.69511
0.089325	-7.69764
0.0895073	-7.71166
0.0895402	-7.71419
0.0897225	-7.72819
0.0897554	-7.73072
0.0899377	-7.74471
0.0899706	-7.74724
0.0901528	-7.76122
0.0901857	-7.76374
0.090368	-7.77771
0.0904009	-7.78023
0.0905832	-7.79419
0.0906161	-7.79671
0.0907983	-7.81065
0.0908312	-7.81317
0.0910135	-7.8271
0.0910464	-7.82961
0.0912287	-7.84354
0.0912616	-7.84605
0.0914438	-7.85996
0.0914767	-7.86247
0.091659	-7.87636
0.0916919	-7.87887
0.0918742	-7.89275
0.0919071	-7.89526
0.0920894	-7.90913
0.0921222	-7.91163
0.0921551	-7.91413
0.0923045	-7.92549
0.0923374	-7.92799
0.0923703	-7.93049
0.0925197	-7.94184
0.0925526	-7.94434
0.0925854	-7.94684
0.0927677	-7.96067
0.0928006	-7.96317
0.0929829	-7.97699
0.0930158	-7.97948
0.0931981	-7.99329
0.0932309	-7.99578
0.0934132	-8.00958
0.0934461	-8.01207
0.0936284	-8.02585
0.0936613	-8.02834
0.0938436	-8.04211
0.0938765	-8.04459
0.0940587	-8.05835
0.0940916	-8.06083
0.0942739	-8.07458
0.0943068	-8.07706
0.0944891	-8.0908
0.094522	-8.09327
0.0947042	-8.107
0.0947371	-8.10947
0.0949194	-8.12318
0.0949523	-8.12565
0.0951346	-8.13935
0.0951675	-8.14182
0.0953497	-8.15551
0.0953826	-8.15797
0.0955649	-8.17165
0.0955978	-8.17411
0.0957801	-8.18777
0.095813	-8.19023
0.0959953	-8.20388
0.0960281	-8.20634
0.0962104	-8.21998
0.0962433	-8.22243
0.0964256	-8.23606
0.0964585	-8.23851
0.0964913	-8.24097
0.0966408	-8.25212
0.0966736	-8.25457
0.0967065	-8.25703
0.0968559	-8.26817
0.0968888	-8.27062
0.0969217	-8.27307
0.0970711	-8.28421
0.097104	-8.28665
0.0971368	-8.2891
0.0973191	-8.30267
0.097352	-8.30512
0.0975343	-8.31867
0.0975672	-8.32112
0.0977495	-8.33466
0.0977824	-8.3371
0.0979646	-8.35063
0.0979975	-8.35307
0.0981798	-8.36659
0.0982127	-8.36903
0.098395	-8.38253
0.0984279	-8.38496
0.0986101	-8.39846
0.098643	-8.40089
0.0988253	-8.41437
0.0988582	-8.4168
0.0990405	-8.43026
0.0990734	-8.43269
0.0992557	-8.44614
0.0992885	-8.44857
0.0994708	-8.46201
0.0995037	-8.46443
0.099686	-8.47785
0.0997189	-8.48028
0.0999012	-8.49369
0.099934	-8.49611
0.100116	-8.50951
0.100149	-8.51192
0.100331	-8.52531
0.100364	-8.52772
0.100547	-8.54109
0.10058	-8.54351
0.100762	-8.55687
0.100795	-8.55927
0.100977	-8.57262
0.10101	-8.57503
0.101043	-8.57743
0.101192	-8.58836
0.101225	-8.59076
0.101258	-8.59317
0.101407	-8.60409
0.10144	-8.60649
0.101473	-8.60889
0.101655	-8.62219
0.101688	-8.62459
0.101871	-8.63788
0.101903	-8.64028
0.102086	-8.65356
0.102119	-8.65595
0.102301	-8.66922
0.102334	-8.67161
0.102516	-8.68486
0.102549	-8.68725
0.102731	-8.70049
0.102764	-8.70287
0.102946	-8.7161
0.102979	-8.71848
0.103162	-8.73169
0.103194	-8.73407
0.103377	-8.74727
0.10341	-8.74965
0.103592	-8.76283
0.103625	-8.76521
0.103807	-8.77838
0.10384	-8.78075
0.104022	-8.79391
0.104055	-8.79628
0.104237	-8.80943
0.10427	-8.8118
0.104453	-8.82493
0.104485	-8.82729
0.104668	-8.84041
0.104701	-8.84277
0.104883	-8.85587
0.104916	-8.85824
0.105098	-8.87132
0.105131	-8.87368
0.105313	-8.88676
0.105346	-8.88912
0.105379	-8.89147
0.105528	-8.90218
0.105561	-8.90453
0.105594	-8.90689
0.105744	-8.91758
0.105776	-8.91993
0.105809	-8.92228
0.105992	-8.93531
0.106024	-8.93766
0.106207	-8.95068
0.10624	-8.95303
0.106422	-8.96603
0.106455	-8.96837
0.106637	-8.98136
0.10667	-8.98371
0.106852	-8.99668
0.106885	-8.99902
0.107067	-9.01198
0.1071	-9.01432
0.107283	-9.02727
0.107315	-9.0296
0.107498	-9.04253
0.107531	-9.04487
0.107713	-9.05779
0.107746	-9.06011
0.107928	-9.07302
0.107961	-9.07535
0.108143	-9.08824
0.108176	-9.09056
0.108358	-9.10344
0.108391	-9.10576
0.108574	-9.11863
0.108607	-9.12094
0.108789	-9.13379
0.108822	-9.13611
0.109004	-9.14895
0.109037	-9.15126
0.109219	-9.16408
0.109252	-9.16639
0.109434	-9.1792
0.109467	-9.18151
0.109649	-9.1943
0.109682	-9.19661
0.109715	-9.19891
0.109865	-9.20939
0.109898	-9.21169
0.10993	-9.21399
0.11008	-9.22445
0.110113	-9.22675
0.110146	-9.22905
0.110295	-9.2395
0.110328	-9.2418
0.110361	-9.2441
0.110543	-9.25683
0.110576	-9.25913
0.110758	-9.27185
0.110791	-9.27414
0.110973	-9.28685
0.111006	-9.28914
0.111189	-9.30183
0.111221	-9.30411
0.111404	-9.31679
0.111437	-9.31907
0.111619	-9.33174
0.111652	-9.33402
0.111834	-9.34667
0.111867	-9.34895
0.112049	-9.36158
0.112082	-9.36386
0.112264	-9.37647
0.112297	-9.37875
0.11248	-9.39135
0.112512	-9.39362
0.112695	-9.40621
0.112728	-9.40848
0.11291	-9.42106
0.112943	-9.42332
0.113125	-9.43588
0.113158	-9.43815
0.11334	-9.45069
0.113373	-9.45295
0.113555	-9.46548
0.113588	-9.46774
0.113771	-9.48026
0.113803	-9.48252
0.113986	-9.49502
0.114019	-9.49727
0.114201	-9.50976
0.114234	-9.51201
0.114267	-9.51426
0.114416	-9.52448
0.114449	-9.52673
0.114482	-9.52898
0.114631	-9.53919
0.114664	-9.54143
0.114697	-9.54368
0.114879	-9.55612
0.114912	-9.55836
0.115094	-9.57078
0.115127	-9.57302
0.11531	-9.58543
0.115342	-9.58767
0.115525	-9.60007
0.115558	-9.6023
0.11574	-9.61468
0.115773	-9.61691
0.115955	-9.62928
0.115988	-9.63151
0.11617	-9.64386
0.116203	-9.64609
0.116385	-9.65842
0.116418	-9.66065
0.116601	-9.67297
0.116633	-9.67519
0.116816	-9.68749
0.116849	-9.68971
0.117031	-9.702
0.117064	-9.70422
0.117246	-9.71649
0.117279	-9.71871
0.117461	-9.73097
0.117494	-9.73318
0.117676	-9.74542
0.117709	-9.74763
0.117892	-9.75986
0.117924	-9.76207
0.118107	-9.77428
0.11814	-9.77649
0.118322	-9.78869
0.118355	-9.79089
0.118537	-9.80307
0.11857	-9.80527
0.118603	-9.80746
0.118752	-9.81744
0.118785	-9.81963
0.118818	-9.82182
0.118967	-9.83179
0.119	-9.83398
0.119033	-9.83617
0.119183	-9.84612
0.119215	-9.84831
0.119248	-9.85049
0.119431	-9.86262
0.119464	-9.8648
0.119646	-9.87691
0.119679	-9.87909
0.119861	-9.89118
0.119894	-9.89336
0.120076	-9.90544
0.120109	-9.90761
0.120291	-9.91968
0.120324	-9.92185
0.120506	-9.93389
0.120539	-9.93607
0.120722	-9.9481
0.120755	-9.95026
0.120937	-9.96228
0.12097	-9.96445
0.121152	-9.97644
0.121185	-9.97861
0.121367	-9.99059
0.1214	-9.99275
0.121582	-10.0047
0.121615	-10.0069
0.121798	-10.0188
0.12183	-10.021
0.122013	-10.0329
0.122046	-10.0351
0.122228	-10.047
0.122261	-10.0491
0.122443	-10.0611
0.122476	-10.0632
0.122658	-10.0751
0.122691	-10.0772
0.122873	-10.0891
0.122906	-10.0912
0.123089	-10.1031
0.123121	-10.1052
0.123154	-10.1074
0.123304	-10.1171
0.123337	-10.1192
0.123369	-10.1214
0.123519	-10.1311
0.123552	-10.1332
0.123585	-10.1353
0.123767	-10.1471
0.1238	-10.1493
0.123982	-10.161
0.124015	-10.1632
0.124197	-10.175
0.12423	-10.1771
0.124412	-10.1888
0.124445	-10.191
0.124628	-10.2027
0.12466	-10.2048
0.124843	-10.2166
0.124876	-10.2187
0.125058	-10.2304
0.125091	-10.2325
0.125273	-10.2442
0.125306	-10.2463
0.125488	-10.258
0.125521	-10.2601
0.125703	-10.2718
0.125736	-10.2739
0.125919	-10.2855
0.125951	-10.2876
0.126134	-10.2993
0.126167	-10.3014
0.126349	-10.313
0.126382	-10.3151
0.126564	-10.3267
0.126597	-10.3288
0.126779	-10.3404
0.126812	-10.3424
0.126994	-10.354
0.127027	-10.3561
0.12721	-10.3677
0.127242	-10.3697
0.127425	-10.3813
0.127458	-10.3834
0.127491	-10.3854
0.12764	-10.3949
0.127673	-10.397
0.127706	-10.399
0.127855	-10.4085
0.127888	-10.4105
0.127921	-10.4126
0.12807	-10.422
0.128103	-10.4241
0.128136	-10.4262
0.128318	-10.4376
0.128351	-10.4397
0.128533	-10.4512
0.128566	-10.4532
0.128749	-10.4647
0.128782	-10.4667
0.128964	-10.4782
0.128997	-10.4802
0.129179	-10.4916
0.129212	-10.4937
0.129394	-10.5051
0.129427	-10.5071
0.129609	-10.5185
0.129642	-10.5206
0.129824	-10.5319
0.129857	-10.534
0.13004	-10.5453
0.130073	-10.5474
0.130255	-10.5587
0.130288	-10.5607
0.13047	-10.572
0.130503	-10.5741
0.130685	-10.5854
0.130718	-10.5874
0.1309	-10.5987
0.130933	-10.6007
0.131115	-10.612
0.131148	-10.614
0.131331	-10.6253
0.131364	-10.6273
0.131546	-10.6385
0.131579	-10.6405
0.131761	-10.6517
0.131794	-10.6538
0.131976	-10.665
0.132009	-10.667
0.132042	-10.669
0.132191	-10.6782
0.132224	-10.6802
0.132257	-10.6822
0.132406	-10.6913
0.132439	-10.6933
0.132472	-10.6954
0.132655	-10.7065
0.132687	-10.7085
0.13287	-10.7196
0.132903	-10.7216
0.133085	-10.7328
0.133118	-10.7348
0.1333	-10.7458
0.133333	-10.7478
0.133515	-10.7589
0.133548	-10.7609
0.13373	-10.772
0.133763	-10.774
0.133946	-10.785
0.133978	-10.787
0.134161	-10.798
0.134194	-10.8
0.134376	-10.811
0.134409	-10.813
0.134591	-10.824
0.134624	-10.826
0.134806	-10.837
0.134839	-10.8389
0.135021	-10.8499
0.135054	-10.8519
0.135237	-10.8628
0.135269	-10.8648
0.135452	-10.8757
0.135485	-10.8777
0.135667	-10.8886
0.1357	-10.8906
0.135882	-10.9015
0.135915	-10.9034
0.136097	-10.9143
0.13613	-10.9163
0.136312	-10.9271
0.136345	-10.9291
0.136378	-10.931
0.136528	-10.9399
0.13656	-10.9419
0.136593	-10.9438
0.136743	-10.9527
0.136776	-10.9547
0.136808	-10.9566
0.136991	-10.9674
0.137024	-10.9694
0.137206	-10.9801
0.137239	-10.9821
0.137421	-10.9929
0.137454	-10.9948
0.137636	-11.0056
0.137669	-11.0075
0.137851	-11.0182
0.137884	-11.0202
0.138067	-11.0309
0.138099	-11.0328
0.138282	-11.0435
0.138315	-11.0455
0.138497	-11.0561
0.13853	-11.0581
0.138712	-11.0687
0.138745	-11.0707
0.138927	-11.0813
0.13896	-11.0832
0.139142	-11.0939
0.139175	-11.0958
0.139358	-11.1064
0.13939	-11.1083
0.139573	-11.1189
0.139606	-11.1208
0.139788	-11.1314
0.139821	-11.1333
0.140003	-11.1439
0.140036	-11.1458
0.140218	-11.1563
0.140251	-11.1582
0.140433	-11.1688
0.140466	-11.1707
0.140649	-11.1812
0.140682	-11.1831
0.140714	-11.185
0.140864	-11.1936
0.140897	-11.1955
0.14093	-11.1973
0.141079	-11.2059
0.141112	-11.2078
0.141145	-11.2097
0.141294	-11.2183
0.141327	-11.2202
0.14136	-11.2221
0.141542	-11.2325
0.141575	-11.2344
0.141757	-11.2448
0.14179	-11.2467
0.141973	-11.2571
0.142005	-11.259
0.142188	-11.2694
0.142221	-11.2712
0.142403	-11.2816
0.142436	-11.2835
0.142618	-11.2938
0.142651	-11.2957
0.142833	-11.306
0.142866	-11.3079
0.143048	-11.3182
0.143081	-11.3201
0.143264	-11.3304
0.143296	-11.3322
0.143479	-11.3425
0.143512	-11.3444
0.143694	-11.3546
0.143727	-11.3565
0.143909	-11.3667
0.143942	-11.3686
0.144124	-11.3788
0.144157	-11.3807
0.144339	-11.3909
0.144372	-11.3927
0.144555	-11.4029
0.144587	-11.4047
0.14477	-11.4149
0.144803	-11.4168
0.144985	-11.4269
0.145018	-11.4288
0.1452	-11.4389
0.145233	-11.4407
0.145266	-11.4426
0.145415	-11.4509
0.145448	-11.4527
0.145481	-11.4545
0.14563	-11.4628
0.145663	-11.4646
0.145696	-11.4664
0.145878	-11.4765
0.145911	-11.4783
0.146094	-11.4884
0.146126	-11.4902
0.146309	-11.5003
0.146342	-11.5021
0.146524	-11.5121
0.146557	-11.5139
0.146739	-11.5239
0.146772	-11.5257
0.146954	-11.5357
0.146987	-11.5375
0.147169	-11.5475
0.147202	-11.5493
0.147385	-11.5593
0.147417	-11.5611
0.1476	-11.571
0.147633	-11.5728
0.147815	-11.5828
0.147848	-11.5845
0.14803	-11.5945
0.148063	-11.5962
0.148245	-11.6061
0.148278	-11.6079
0.14846	-11.6178
0.148493	-11.6196
0.148676	-11.6294
0.148708	-11.6312
0.148891	-11.641
0.148924	-11.6428
0.149106	-11.6526
0.149139	-11.6544
0.149321	-11.6642
0.149354	-11.666
0.149536	-11.6757
0.149569	-11.6775
0.149602	-11.6793
0.149751	-11.6873
0.149784	-11.689
0.149817	-11.6908
0.149967	-11.6988
0.149999	-11.7005
0.150032	-11.7023
0.150182	-11.7103
0.150215	-11.712
0.150248	-11.7138
0.15043	-11.7235
0.150463	-11.7252
0.150645	-11.7349
0.150678	-11.7367
0.15086	-11.7463
0.150893	-11.7481
0.151075	-11.7577
0.151108	-11.7595
0.15129	-11.7691
0.151323	-11.7708
0.151506	-11.7805
0.151539	-11.7822
0.151721	-11.7918
0.151754	-11.7935
0.151936	-11.8031
0.151969	-11.8048
0.152151	-11.8144
0.152184	-11.8161
0.152366	-11.8257
0.152399	-11.8274
0.152581	-11.8369
0.152614	-11.8386
0.152797	-11.8481
0.15283	-11.8498
0.153012	-11.8593
0.153045	-11.861
0.153227	-11.8705
0.15326	-11.8722
0.153442	-11.8817
0.153475	-11.8834
0.153657	-11.8928
0.15369	-11.8945
0.153872	-11.9039
0.153905	-11.9056
0.154088	-11.915
0.154121	-11.9167
0.154153	-11.9184
0.154303	-11.9261
0.154336	-11.9278
0.154369	-11.9295
0.154518	-11.9371
0.154551	-11.9388
0.154584	-11.9405
0.154766	-11.9498
0.154799	-11.9515
0.154981	-11.9609
0.155014	-11.9625
0.155196	-11.9718
0.155229	-11.9735
0.155412	-11.9828
0.155444	-11.9845
0.155627	-11.9937
0.15566	-11.9954
0.155842	-12.0046
0.155875	-12.0063
0.156057	-12.0155
0.15609	-12.0172
0.156272	-12.0264
0.156305	-12.0281
0.156487	-12.0373
0.15652	-12.0389
0.156703	-12.0481
0.156735	-12.0497
0.156918	-12.0589
0.156951	-12.0605
0.157133	-12.0697
0.157166	-12.0713
0.157348	-12.0804
0.157381	-12.0821
0.157563	-12.0912
0.157596	-12.0928
0.157778	-12.1019
0.157811	-12.1035
0.157994	-12.1126
0.158026	-12.1142
0.158209	-12.1233
0.158242	-12.1249
0.158424	-12.1339
0.158457	-12.1355
0.15849	-12.1372
0.158639	-12.1445
0.158672	-12.1462
0.158705	-12.1478
0.158854	-12.1551
0.158887	-12.1568
0.15892	-12.1584
0.159102	-12.1673
0.159135	-12.169
0.159317	-12.1779
0.15935	-12.1795
0.159533	-12.1884
0.159565	-12.1901
0.159748	-12.199
0.159781	-12.2006
0.159963	-12.2095
0.159996	-12.2111
0.160178	-12.2199
0.160211	-12.2215
0.160393	-12.2304
0.160426	-12.232
0.160608	-12.2408
0.160641	-12.2424
0.160824	-12.2512
0.160857	-12.2528
0.161039	-12.2616
0.161072	-12.2632
0.161254	-12.2719
0.161287	-12.2735
0.161469	-12.2823
0.161502	-12.2838
0.161684	-12.2926
0.161717	-12.2942
0.161899	-12.3029
0.161932	-12.3044
0.162115	-12.3131
0.162148	-12.3147
0.16233	-12.3234
0.162363	-12.3249
0.162545	-12.3336
0.162578	-12.3352
0.16276	-12.3438
0.162793	-12.3454
0.162826	-12.3469
0.162975	-12.354
0.163008	-12.3555
0.163041	-12.3571
0.16319	-12.3641
0.163223	-12.3657
0.163256	-12.3672
0.163406	-12.3743
0.163439	-12.3758
0.163471	-12.3774
0.163654	-12.3859
0.163687	-12.3875
0.163869	-12.396
0.163902	-12.3975
0.164084	-12.4061
0.164117	-12.4076
0.164299	-12.4161
0.164332	-12.4176
0.164514	-12.4261
0.164547	-12.4277
0.16473	-12.4361
0.164762	-12.4376
0.164945	-12.4461
0.164978	-12.4476
0.16516	-12.456
0.165193	-12.4576
0.165375	-12.466
0.165408	-12.4675
0.16559	-12.4759
0.165623	-12.4774
0.165805	-12.4857
0.165838	-12.4872
0.166021	-12.4956
0.166053	-12.4971
0.166236	-12.5054
0.166269	-12.5069
0.166451	-12.5152
0.166484	-12.5167
0.166666	-12.525
0.166699	-12.5265
0.166881	-12.5348
0.166914	-12.5363
0.167096	-12.5445
0.167129	-12.546
0.167312	-12.5543
0.167344	-12.5557
0.167377	-12.5572
0.167527	-12.564
0.16756	-12.5654
0.167592	-12.5669
0.167742	-12.5736
0.167775	-12.5751
0.167808	-12.5766
0.16799	-12.5847
0.168023	-12.5862
0.168205	-12.5944
0.168238	-12.5958
0.16842	-12.604
0.168453	-12.6054
0.168635	-12.6136
0.168668	-12.615
0.168851	-12.6231
0.168883	-12.6246
0.169066	-12.6326
0.169099	-12.6341
0.169281	-12.6421
0.169314	-12.6436
0.169496	-12.6516
0.169529	-12.6531
0.169711	-12.6611
0.169744	-12.6625
0.169926	-12.6705
0.169959	-12.672
0.170142	-12.6799
0.170174	-12.6814
0.170357	-12.6893
0.17039	-12.6908
0.170572	-12.6987
0.170605	-12.7001
0.170787	-12.7081
0.17082	-12.7095
0.171002	-12.7174
0.171035	-12.7188
0.171217	-12.7267
0.17125	-12.7281
0.171433	-12.736
0.171465	-12.7374
0.171648	-12.7452
0.171681	-12.7466
0.171714	-12.748
0.171863	-12.7544
0.171896	-12.7558
0.171929	-12.7573
0.172078	-12.7636
0.172111	-12.7651
0.172144	-12.7665
0.172293	-12.7728
0.172326	-12.7742
0.172359	-12.7756
0.172541	-12.7834
0.172574	-12.7848
0.172756	-12.7925
0.172789	-12.7939
0.172972	-12.8016
0.173005	-12.803
0.173187	-12.8107
0.17322	-12.8121
0.173402	-12.8198
0.173435	-12.8212
0.173617	-12.8288
0.17365	-12.8302
0.173832	-12.8378
0.173865	-12.8392
0.174048	-12.8468
0.17408	-12.8482
0.174263	-12.8558
0.174296	-12.8572
0.174478	-12.8647
0.174511	-12.8661
0.174693	-12.8737
0.174726	-12.875
0.174908	-12.8826
0.174941	-12.8839
0.175123	-12.8914
0.175156	-12.8928
0.175339	-12.9003
0.175371	-12.9016
0.175554	-12.9091
0.175587	-12.9105
0.175769	-12.9179
0.175802	-12.9193
0.175984	-12.9267
0.176017	-12.928
0.176199	-12.9355
0.176232	-12.9368
0.176265	-12.9381
0.176414	-12.9442
0.176447	-12.9455
0.17648	-12.9469
0.17663	-12.9529
0.176662	-12.9542
0.176695	-12.9556
0.176878	-12.9629
0.17691	-12.9642
0.177093	-12.9716
0.177126	-12.9729
0.177308	-12.9802
0.177341	-12.9815
0.177523	-12.9888
0.177556	-12.9901
0.177738	-12.9974
0.177771	-12.9987
0.177953	-13.006
0.177986	-13.0073
0.178169	-13.0145
0.178201	-13.0158
0.178384	-13.023
0.178417	-13.0243
0.178599	-13.0315
0.178632	-13.0328
0.178814	-13.04
0.178847	-13.0413
0.179029	-13.0484
0.179062	-13.0497
0.179244	-13.0569
0.179277	-13.0581
0.17946	-13.0652
0.179492	-13.0665
0.179675	-13.0736
0.179708	-13.0749
0.17989	-13.082
0.179923	-13.0832
0.180105	-13.0903
0.180138	-13.0916
0.18032	-13.0986
0.180353	-13.0999
0.180535	-13.1069
0.180568	-13.1081
0.180601	-13.1094
0.180751	-13.1151
0.180783	-13.1164
0.180816	-13.1176
0.180966	-13.1234
0.180999	-13.1246
0.181032	-13.1259
0.181214	-13.1328
0.181247	-13.1341
0.181429	-13.141
0.181462	-13.1422
0.181644	-13.1491
0.181677	-13.1504
0.181859	-13.1573
0.181892	-13.1585
0.182074	-13.1654
0.182107	-13.1666
0.18229	-13.1735
0.182323	-13.1747
0.182505	-13.1815
0.182538	-13.1828
0.18272	-13.1896
0.182753	-13.1908
0.182935	-13.1976
0.182968	-13.1988
0.18315	-13.2056
0.183183	-13.2068
0.183365	-13.2135
0.183398	-13.2147
0.183581	-13.2215
0.183614	-13.2227
0.183796	-13.2294
0.183829	-13.2306
0.184011	-13.2373
0.184044	-13.2385
0.184226	-13.2451
0.184259	-13.2463
0.184441	-13.253
0.184474	-13.2542
0.184656	-13.2608
0.184689	-13.262
0.184872	-13.2686
0.184905	-13.2698
0.184937	-13.2709
0.185087	-13.2763
0.18512	-13.2775
0.185153	-13.2787
0.185302	-13.2841
0.185335	-13.2853
0.185368	-13.2864
0.185517	-13.2918
0.18555	-13.293
0.185583	-13.2941
0.185765	-13.3007
0.185798	-13.3018
0.18598	-13.3083
0.186013	-13.3095
0.186196	-13.316
0.186228	-13.3171
0.186411	-13.3236
0.186444	-13.3248
0.186626	-13.3312
0.186659	-13.3323
0.186841	-13.3388
0.186874	-13.3399
0.187056	-13.3463
0.187089	-13.3475
0.187271	-13.3538
0.187304	-13.355
0.187487	-13.3613
0.187519	-13.3625
0.187702	-13.3688
0.187735	-13.3699
0.187917	-13.3762
0.18795	-13.3774
0.188132	-13.3837
0.188165	-13.3848
0.188347	-13.3911
0.18838	-13.3922
0.188562	-13.3984
0.188595	-13.3996
0.188778	-13.4058
0.18881	-13.4069
0.188993	-13.4131
0.189026	-13.4142
0.189208	-13.4204
0.189241	-13.4215
0.189423	-13.4277
0.189456	-13.4288
0.189489	-13.4299
0.189638	-13.4349
0.189671	-13.436
0.189704	-13.4371
0.189853	-13.4422
0.189886	-13.4433
0.189919	-13.4444
0.190101	-13.4505
0.190134	-13.4516
0.190317	-13.4576
0.190349	-13.4587
0.190532	-13.4648
0.190565	-13.4659
0.190747	-13.4719
0.19078	-13.473
0.190962	-13.479
0.190995	-13.4801
0.191177	-13.4861
0.19121	-13.4872
0.191392	-13.4931
0.191425	-13.4942
0.191608	-13.5002
0.19164	-13.5012
0.191823	-13.5072
0.191856	-13.5082
0.192038	-13.5141
0.192071	-13.5152
0.192253	-13.5211
0.192286	-13.5222
0.192468	-13.528
0.192501	-13.5291
0.192683	-13.5349
0.192716	-13.536
0.192899	-13.5418
0.192932	-13.5428
0.193114	-13.5487
0.193147	-13.5497
0.193329	-13.5555
0.193362	-13.5565
0.193544	-13.5623
0.193577	-13.5633
0.193759	-13.5691
0.193792	-13.5701
0.193825	-13.5711
0.193974	-13.5758
0.194007	-13.5768
0.19404	-13.5779
0.19419	-13.5825
0.194223	-13.5836
0.194255	-13.5846
0.194405	-13.5893
0.194438	-13.5903
0.194471	-13.5913
0.194653	-13.5969
0.194686	-13.598
0.194868	-13.6036
0.194901	-13.6046
0.195083	-13.6102
0.195116	-13.6112
0.195298	-13.6168
0.195331	-13.6178
0.195514	-13.6234
0.195546	-13.6244
0.195729	-13.63
0.195762	-13.631
0.195944	-13.6365
0.195977	-13.6375
0.196159	-13.643
0.196192	-13.644
0.196374	-13.6495
0.196407	-13.6504
0.196589	-13.6559
0.196622	-13.6569
0.196805	-13.6623
0.196837	-13.6633
0.19702	-13.6687
0.197053	-13.6697
0.197235	-13.6751
0.197268	-13.6761
0.19745	-13.6815
0.197483	-13.6824
0.197665	-13.6878
0.197698	-13.6888
0.19788	-13.6941
0.197913	-13.6951
0.198096	-13.7004
0.198128	-13.7013
0.198311	-13.7066
0.198344	-13.7076
0.198376	-13.7085
0.198526	-13.7129
0.198559	-13.7138
0.198592	-13.7148
0.198741	-13.7191
0.198774	-13.72
0.198807	-13.7209
0.198989	-13.7262
0.199022	-13.7271
0.199204	-13.7323
0.199237	-13.7333
0.199419	-13.7384
0.199452	-13.7394
0.199635	-13.7445
0.199667	-13.7455
0.19985	-13.7506
0.199883	-13.7515
0.200065	-13.7567
[truncated: 8,001 more rows]

## Sheet: bplanetRVsphased
Phases	RVs	Unc	Spectrograph
0.575747	6.66803	3.93569	HARPS
0.82617	12.8558	2.3623	HARPS
0.0162838	-1.51274	2.89416	HARPS
0.572737	6.45376	3.75645	HARPS
0.685125	13.1239	3.77325	HARPS
0.2328	-14.3531	3.74814	HARPS
0.835371	11.0823	8.09161	HARPS
0.369447	-10.5162	3.06013	HARPS
0.310615	-13.2432	4.87986	HARPS
0.818203	13.7176	4.29588	HARPS
0.819465	12.0766	4.75192	HARPS
0.935136	7.66422	2.31165	HARPS
0.936423	1.72188	3.28713	HARPS
0.0610691	-4.2174	5.07106	HARPS
0.0623681	-6.39457	4.98215	HARPS
0.970887	4.95717	2.93663	HARPS
0.972064	0.341724	2.80398	HARPS
0.0887469	-8.19554	1.83853	HARPS
0.0904524	-7.1462	2.04821	HARPS
0.566592	5.79889	3.47135	HARPS
0.685174	13.27	3.47876	HARPS
0.918143	7.2671	3.23573	HARPS
0.464929	-8.08232	5.1267	HARPS
0.466112	0.766521	4.4278	HARPS
0.73932	14.584	3.35107	HARPS
0.740458	14.276	3.0325	HARPS
0.22833	-10.9646	5.75752	HARPS
0.229466	-16.6019	4.96062	HARPS
0.212424	-15.609	2.38298	HARPS
0.213685	-12.6768	2.25507	HARPS
0.159857	-12.0137	4.30863	HARPS
0.16113	-12.3537	3.88333	HARPS
0.600093	9.99004	2.44362	HARPS
0.601354	7.02515	2.52814	HARPS
0.713714	15.7473	7.07721	HARPS
0.714963	11.3628	7.63451	HARPS
0.259175	-13.5203	4.23785	HARPS
0.260424	-15.0485	3.82474	HARPS
0.158857	-11.9058	3.06255	HARPS
0.160132	-12.4639	3.13905	HARPS
0.391169	-7.45936	2.93853	HARPS
0.39237	-11.6934	3.6759	HARPS
0.404514	-8.56926	2.738	HARPS
0.405787	-7.78864	2.3261	HARPS
0.525013	2.40551	2.7237	HARPS
0.526286	2.26539	2.34002	HARPS
0.64232	12.0636	1.97949	HARPS
0.64363	10.5576	2.00918	HARPS
0.712972	14.3243	3.83016	iSHELL
0.365742	-13.2758	20.2035	iSHELL
0.4797	-1.92232	3.10932	iSHELL
0.253106	-12.9476	7.67198	iSHELL
0.962074	1.70951	14.053	iSHELL
0.876837	9.80227	7.29594	iSHELL
0.810921	9.20196	14.3457	iSHELL
0.871282	10.685	2.63473	iSHELL
0.942338	-0.0302099	23.3412	iSHELL
0.0597294	-15.345	17.4905	iSHELL
0.177329	-11.0251	7.69908	iSHELL
0.477945	-1.29495	9.17625	iSHELL
0.594812	8.55156	10.2574	iSHELL
0.713769	12.404	12.5049	iSHELL
0.831069	10.8275	16.0994	iSHELL
0.0297703	-3.34418	9.46272	iSHELL
0.955918	-4.53389	22.7593	iSHELL
0.763587	11.246	11.7266	iSHELL
0.897512	7.66584	9.39322	iSHELL
0.727655	17.9257	9.26857	iSHELL
0.389963	-3.29513	7.8931	iSHELL
0.845517	27.1715	10.7522	iSHELL
0.965867	2.87907	5.64177	iSHELL
0.0841291	-7.26216	5.59609	iSHELL
0.208072	-14.5364	3.61518	iSHELL
0.32476	-13.4481	3.44315	iSHELL
0.436372	-5.82632	1.25299	iSHELL
0.679161	13.2508	5	HIRES
0.320209	-13.3922	5	HIRES
0.586739	7.02897	5	HIRES
0.698891	14.0181	5	HIRES
0.810029	13.6589	5	HIRES
0.521804	2.25614	5	HIRES
0.638321	10.9001	5	HIRES
0.71187	14.2539	5	HIRES
0.840497	11.8314	5	HIRES
0.484321	-1.34561	5	HIRES
0.72282	14.0152	5	HIRES
0.881817	9.64329	5	HIRES
0.259886	-14.6246	5	HIRES
0.327453	-12.6525	5	HIRES
0.502689	0.27064	5	HIRES
0.11072	-8.76868	5.43	HIRES
