# Supplementary material for: A planet within the debris disk around the pre-main-sequence star AU Microscopii
Source: Springer Nature journal article supplement (doi:10.1038/s41586-020-2400-z), 2020-06-24
Supplement: MOESM11 [file 41586_2020_2400_MOESM11_ESM.xlsx]

## Sheet: chains
Corner plot made with corner.py: https://corner.readthedocs.io/en/latest/index.html
Chains:
K_b	eta_1_VIS	eta_1_NIR	eta_2	eta_3	eta_4	gamma_harps	gamma_iSHELL	gamma_HIRES
8.4252	144.823	80.7808	127.043	4.86628	0.370488	56.1922	-2.09709	-26.9699
18.1835	159.165	61.201	191.604	4.8535	0.359999	-21.0134	-2.6059	-20.804
19.8289	132.799	86.8197	173.41	4.85893	0.342011	-32.2692	-5.62949	-18.0767
13.127	103.119	67.531	80.0083	4.87182	0.335049	28.0027	-1.76581	-10.1397
14.2451	120.738	73.691	103.962	4.86113	0.3235	26.4083	-2.99698	-35.2002
6.03107	134.312	77.5527	124.76	4.86243	0.382817	15.6126	-0.856698	-20.9607
9.08174	127.875	136.808	165.742	4.85839	0.37972	-26.0386	-4.71387	-51.2925
13.4473	137.527	81.3366	134.134	4.86677	0.356456	18.9427	-2.14517	-27.2641
14.925	128.861	80.2898	120.966	4.86203	0.360282	7.55515	0.321369	22.9528
16.0428	140.244	73.6382	74.2986	4.86069	0.392055	22.6712	-1.66255	-37.9394
4.80765	160.321	73.7857	165.186	4.8569	0.38976	22.0741	0.684377	1.72797
15.8914	160.798	101.36	113.813	4.85292	0.432199	3.09234	1.6331	5.75113
6.97734	164.033	90.8583	167.627	4.85741	0.355993	25.0363	0.146145	-43.4613
17.6525	118.89	73.6787	118.159	4.84851	0.355259	24.8912	-0.326034	-1.42574
18.5529	152.767	91.198	60.1501	4.8647	0.406522	35.6682	-3.32137	-90.1891
14.5713	137.948	73.3588	134.98	4.86501	0.384555	1.54678	-1.43991	-12.6359
7.33665	125.736	65.0887	142.855	4.85769	0.364387	18.1477	-4.0337	-29.9274
12.9667	184.553	105.878	131.755	4.85053	0.388835	23.9921	0.536238	7.38573
11.5665	143.876	63.6299	154.818	4.86035	0.360131	22.5705	1.00715	26.2327
18.5073	162.117	83.8155	107.758	4.86015	0.346193	9.3494	-1.6319	-10.5139
12.0298	133.843	82.6928	114.886	4.85274	0.348145	24.6252	-1.84801	-24.8093
14.9881	127.373	101.851	92.9654	4.8625	0.388078	16.0176	-3.38604	-36.7467
12.8162	146.367	63.091	109.161	4.86324	0.328998	59.1841	-0.495584	-29.0317
14.1738	146.111	63.4061	87.5848	4.87004	0.335653	6.187	-0.709442	-2.38074
17.9446	137.218	67.0085	89.4366	4.87007	0.378789	13.7766	-1.40651	-16.9879
23.3386	140.661	111.914	138.061	4.85389	0.411251	-17.5314	-5.41414	-46.1737
9.71001	141.667	95.6832	160.137	4.85411	0.373256	-19.511	-2.7546	-11.4245
12.4032	136.475	69.485	97.5358	4.86126	0.34051	9.10423	-0.643282	-11.1445
9.34129	148.06	77.6637	59.5581	4.85987	0.355046	-6.71786	-0.890899	-5.03525
17.4295	114.632	91.7148	137.78	4.85861	0.356782	-36.0495	0.256623	35.8796
9.50371	115.919	81.2549	132.227	4.8586	0.366789	62.233	-5.15071	-45.8859
19.8241	157.467	82.982	133.39	4.85298	0.380916	-9.66701	-0.340309	-10.6662
15.5139	125.045	80.5058	155.411	4.85836	0.354028	2.15887	-5.64899	-29.51
16.4294	129.737	108.645	93.7992	4.86866	0.39031	7.80351	-0.0677555	-0.268498
17.2344	125.973	77.0356	85.8105	4.85527	0.282204	43.3142	-2.70133	-53.7093
0.436649	133.192	66.4778	113.523	4.86827	0.38216	25.9286	0.928704	-21.1443
12.6314	133.257	105.005	142.915	4.86105	0.354557	-10.7338	-2.71777	-18.29
13.194	122.147	80.0462	156.573	4.87045	0.358401	25.7132	-2.95593	-51.3986
16.5026	127.8	90.8857	145.616	4.86066	0.371045	1.69367	1.23037	38.776
16.1198	134.604	61.7405	79.8193	4.86935	0.388992	30.6843	-3.06481	-61.5324
11.7641	141.854	73.3484	158.641	4.8547	0.382856	-2.81328	-1.54445	22.6823
18.2139	155.209	94.2454	69.735	4.86133	0.410723	70.5708	6.23389	6.0341
9.05076	153.69	98.2254	160.434	4.85818	0.353612	18.6955	-0.494033	-40.8754
13.0335	114.876	73.1995	125.266	4.84649	0.363068	50.1777	0.630476	-5.61101
12.7656	157.697	66.9798	114.522	4.86265	0.32477	65.4949	1.77981	-18.1361
19.1007	156.459	75.9043	112.813	4.86247	0.402567	-34.1495	0.435432	11.8903
8.36943	117.211	66.2636	145.087	4.85486	0.360757	-1.5402	-6.95238	-40.9222
13.6664	169.245	96.5235	108.217	4.85494	0.383392	7.4139	4.4166	76.9809
10.6349	134.251	58.6448	158.288	4.86093	0.341874	31.7554	-0.303722	11.7347
25.7786	205.833	97.4185	130.532	4.86214	0.370172	-15.8614	-2.32142	13.1243
11.9509	125.182	87.4142	106.254	4.85707	0.330746	35.7724	-1.9668	-33.7269
10.3907	133.562	104.446	85.5074	4.85403	0.391871	36.5775	-6.64078	-83.689
14.2156	151.592	71.0397	147.542	4.86244	0.356345	61.8058	0.0503632	-26.7793
15.7865	144.803	74.8846	127.842	4.86336	0.346077	1.41875	-3.053	-8.41974
16.8113	140.892	67.6521	97.8215	4.86409	0.358662	35.3031	-3.3053	-67.7391
12.9347	123.566	98.0455	167.304	4.85633	0.389638	13.4077	-4.63305	-24.318
11.5362	135.284	81.7454	125.211	4.85034	0.376066	-25.9029	-2.08364	-4.16166
13.925	139.961	71.4175	56.7866	4.86621	0.331019	-3.88246	-1.9182	-35.303
12.764	141.029	75.8475	63.7062	4.85568	0.375739	-22.2613	-2.06175	-23.2873
13.9703	127.815	79.8944	102.992	4.86214	0.355718	-7.66949	-1.67718	-6.22859
6.0168	139.264	68.2185	119.533	4.85965	0.342352	55.3329	-2.3242	-51.0349
15.7197	132.446	78.7937	142.715	4.8501	0.348947	34.7786	-2.28844	-54.4759
18.4145	131.032	86.8374	167.919	4.85776	0.351518	28.5291	-6.95254	-67.2703
18.3183	142.47	90.7395	79.9545	4.86704	0.391663	14.8048	0.0437116	-17.6801
18.0033	146.341	75.6261	117.664	4.85705	0.334676	-19.5483	-0.201869	24.5812
4.30008	148.47	66.6669	99.8388	4.86409	0.383675	-14.4038	4.3606	40.6941
11.9109	161.954	157.266	156.451	4.85632	0.39259	-19.5274	-2.02459	-16.4092
14.4186	128.497	86.1616	146.31	4.87042	0.362331	26.2728	-3.3207	-68.6088
19.368	126.802	96.8546	152.904	4.86577	0.376419	10.9764	0.73403	34.7708
12.5815	128.297	63.0328	87.9492	4.86874	0.401179	32.9269	1.95214	-15.9144
13.1454	152.761	74.6972	152.4	4.85896	0.383872	-0.955291	0.0388958	22.7381
16.8168	150.306	96.2778	109.447	4.85922	0.378937	12.3823	2.88387	29.5761
5.25388	137.154	90.7237	156.427	4.8595	0.336984	-6.67105	-2.44208	-40.1481
11.8426	127.739	74.8374	142.576	4.85711	0.364526	29.8907	0.0499673	-4.25271
14.2075	153.019	68.8202	118.058	4.85957	0.329106	63.6443	0.968106	-25.3255
23.1135	170.508	71.3421	107.927	4.86837	0.395745	-9.75165	2.35495	9.65717
14.811	148.743	66.7511	137.208	4.85861	0.377121	14.4541	-3.11969	-5.66837
19.0399	196.969	81.2523	108.221	4.85728	0.39046	29.3822	8.1722	58.2423
12.3103	145.538	63.9834	153.128	4.86127	0.349387	7.18098	-2.02134	20.1366
12.5397	193.788	91.0005	127.817	4.86052	0.381669	29.6799	2.94125	5.85882
12.683	133.571	80.1393	85.1526	4.85732	0.354125	-3.50866	-3.11361	-27.8039
15.367	124.46	97.7223	128.846	4.86542	0.379017	41.3472	-3.34076	-46.7621
19.948	184.426	81.4286	133.318	4.86526	0.365178	53.3288	-1.71209	-64.2449
14.9985	151.567	93.0191	155.628	4.86203	0.382298	-9.22428	-6.3302	24.8893
15.2169	129.986	72.0975	75.2756	4.86679	0.382544	3.177	-4.21214	-71.1056
11.8781	129.903	101.806	154.335	4.86037	0.39522	17.0439	-1.91572	-13.0655
10.4171	134.329	78.7094	127.343	4.85384	0.365759	-17.7803	-2.74789	0.151025
15.945	146.22	64.7545	134.069	4.85803	0.344988	-25.129	-3.17944	-13.9761
12.7324	141.733	76.958	91.9319	4.85278	0.388222	-29.1586	-3.30664	-16.6788
12.8104	126.979	79.9212	102.379	4.86316	0.359225	-12.9424	-2.11893	-2.3152
9.35629	118.131	66.728	125.794	4.86496	0.3829	10.1407	-3.93376	-46.9454
11.7181	136.788	74.7895	137.9	4.85624	0.356943	-0.627521	-6.7548	-38.6108
24.1246	139.052	86.0256	146.773	4.85919	0.344003	42.8252	-6.59224	-88.0636
15.3784	159.298	94.3406	94.4303	4.86666	0.396499	27.0642	-2.08076	-19.644
17.9856	149.037	74.5412	128.835	4.85668	0.33097	-21.2438	-0.398119	37.6212
10.7161	142.886	75.0442	121.102	4.86264	0.372437	5.60829	0.774527	-6.45529
10.3518	148.608	94.6167	139.526	4.85535	0.364176	-5.8886	-2.73202	-13.2747
13.9981	131.011	70.4822	102.209	4.87106	0.384883	16.092	-1.13146	-20.2689
20.7855	137.384	96.5427	155.118	4.86611	0.374931	6.3213	-1.6956	16.9221
14.2695	141.699	71.4374	62.9154	4.86547	0.411319	28.5933	7.85245	38.6957
5.49647	158.044	85.1957	149.2	4.85619	0.389375	11.404	0.807407	32.0466
9.54962	140.446	90.3312	102.121	4.85112	0.367053	-4.47661	10.092	50.1941
12.8796	136.329	90.9524	146.603	4.8601	0.343453	37.8224	0.556025	-41.2702
10.8826	122.448	67.39	146.325	4.85407	0.365589	27.4475	-0.771071	5.42793
14.6895	146.587	52.7826	108.965	4.86193	0.320259	53.4552	-1.50686	-12.2376
22.0706	156.915	77.482	140.991	4.86501	0.387974	-72.2873	-6.26487	10.4284
10.6117	147.831	60.811	141.558	4.85786	0.377797	24.2673	-3.92807	-2.77677
15.8883	160.859	71.5947	76.6733	4.8563	0.402644	87.887	-0.647984	-22.67
13.4803	145.044	73.3547	122.504	4.86128	0.344451	-28.8729	-0.515953	35.1642
13.7303	185.944	85.8457	103.814	4.8624	0.368086	53.0153	2.77216	-10.4481
7.46391	149.804	68.3954	114.191	4.85703	0.340084	21.3011	-13.529	-79.6403
19.188	129.154	80.2358	124.872	4.85139	0.357716	70.1485	5.40675	-6.9817
24.6286	212.092	80.4738	136.088	4.86683	0.365365	88.7546	-2.77763	-99.424
12.7439	148.244	98.4633	140.057	4.85778	0.388885	-8.37099	-5.55219	26.4194
14.0483	127.387	60.7089	81.492	4.86224	0.380471	10.2211	-2.93123	-51.7349
10.5044	128.895	85.3392	145.3	4.85962	0.36236	4.49352	-2.3644	-28.2039
15.8214	169.826	88.5043	98.6367	4.85665	0.365967	6.31207	2.4888	-12.1563
14.7878	146.337	68.1166	115.133	4.85166	0.347897	-55.1351	-0.0987441	5.3335
10.2829	141.297	78.3855	81.0791	4.84863	0.376746	0.171125	0.651596	-11.9114
9.8405	127.769	90.8843	122.467	4.86041	0.346973	-17.7863	-4.59673	-11.0327
12.1125	103.524	88.294	114.73	4.86483	0.384689	-51.5715	4.58963	3.06975
10.6612	141.282	69.6351	137.751	4.85906	0.345013	2.32491	-11.5206	-62.4284
24.5785	133.178	76.8273	119.033	4.86364	0.372441	35.4491	-2.24573	-40.3143
16.9816	158.743	102.203	86.8362	4.87404	0.41755	34.4978	-2.00941	-23.9424
16.1491	151.162	91.5379	125.326	4.85965	0.359656	-42.3189	2.43558	60.5763
25.9845	152.23	66.0215	112.856	4.86162	0.358864	61.1089	3.30605	-15.2318
15.5392	143.773	124.941	125.636	4.8624	0.391217	-17.8515	11.0907	66.4133
14.3306	127.719	71.5718	91.402	4.87334	0.39531	10.1922	1.0272	-1.94451
12.8948	152.783	90.9667	144.648	4.8505	0.366262	4.50824	-8.06914	-11.4318
12.4007	140.377	73.2785	91.7715	4.86368	0.395122	36.5955	6.85745	22.4858
9.04527	151.808	81.6113	143.148	4.85736	0.378258	2.44626	-2.45191	-21.0614
13.2212	133.713	71.1212	99.1211	4.85864	0.349392	25.6296	9.36507	25.1694
9.46927	159.685	84.4061	102.628	4.85665	0.356167	32.3073	2.09157	-16.2056
13.6032	129.595	68.0867	121.536	4.85747	0.383819	28.3617	-2.19888	56.2921
11.9321	165.232	56.1151	107.062	4.86141	0.344807	58.5757	-4.61191	-21.2568
18.9544	162.237	81.2251	130.779	4.86564	0.369517	-58.5022	-8.90544	-41.6065
12.8032	170.105	70.504	147.36	4.86051	0.402036	78.9733	4.05058	49.1009
9.51832	154.357	63.8433	71.4062	4.86029	0.398525	36.4013	5.08916	59.8755
15.3965	136.584	64.2927	58.1118	4.86794	0.376627	21.6347	8.17631	63.6754
15.2455	170.403	104.612	125.594	4.86218	0.353173	19.2158	0.188749	-30.5272
9.18892	141.396	64.3402	98.8903	4.85552	0.353852	11.6132	-11.5723	-83.5207
19.48	118.09	74.1799	108.296	4.85313	0.370616	38.6838	6.20272	0.750799
15.972	170.231	93.8138	135.604	4.86106	0.378323	22.0355	-3.82788	-25.8611
10.8772	143.245	111.391	137.062	4.85469	0.401069	-38.2858	-10.2267	50.0115
16.6618	122.276	61.6397	81.9794	4.8645	0.391562	17.6461	0.729065	-41.013
5.92728	121.369	76.6246	180.743	4.85902	0.332929	10.1078	5.39835	1.51594
13.6804	164.791	88.8483	77.8533	4.85598	0.388721	64.4465	0.466544	-37.5022
14.9052	157.719	76.3584	136.914	4.85501	0.354107	-59.9379	-1.82483	-2.77248
8.48805	137.644	86.5807	74.1337	4.8484	0.390812	-39.8985	-5.78172	-20.7318
12.2623	123.05	87.8048	120.669	4.85967	0.360448	25.5396	-6.39176	-74.6723
10.3998	116.101	86.1088	109.774	4.8635	0.3946	-36.0773	4.1775	15.4087
9.29735	136.547	61.259	121.335	4.85537	0.347509	43.9592	-15.592	-78.1221
16.2474	137.007	79.9665	122.517	4.86834	0.363174	27.4408	-10.0622	-47.9376
18.3195	155.132	91.7349	162.745	4.86172	0.374934	-40.004	-8.36583	-38.3966
17.2057	142.927	70.4541	71.9717	4.85429	0.350078	-1.17889	13.8705	51.0497
26.6435	175.446	67.0236	137.507	4.85684	0.353306	66.1315	3.44247	-7.28635
16.726	156.011	76.0106	133.429	4.86127	0.382382	-19.2272	-0.923269	60.7802
14.3248	137.672	66.6249	85.8642	4.86858	0.37876	19.8256	-1.3659	-23.5519
11.1957	145.039	92.2145	154.161	4.85027	0.372486	30.8201	-14.4761	-31.3888
14.2506	138.62	73.0761	113.324	4.86241	0.383048	33.7214	0.0912453	-21.4622
9.6685	148.02	89.3405	137.612	4.85864	0.367926	10.6609	-6.07537	-43.819
17.2142	158.583	64.5159	75.6144	4.85453	0.365118	27.6727	10.8383	45.1579
2.94135	144.654	90.4914	76.6333	4.85064	0.338969	11.0511	9.04851	2.57838
8.77504	137.214	62.2886	100.316	4.85465	0.376273	12.6048	-1.65512	49.1177
13.0826	174.839	58.8765	143.164	4.85604	0.343549	42.1894	-7.47346	-46.2949
15.6373	136.269	77.7419	149.472	4.86235	0.354062	-45.8881	-6.24904	-45.3998
14.1404	164.388	66.1045	130.414	4.85977	0.393779	50.332	1.23547	27.4556
14.7002	165.081	72.2067	120.391	4.85462	0.398265	36.7691	2.21168	19.0351
15.5992	135.136	79.1598	71.236	4.86066	0.359953	-1.2325	3.51802	34.5454
11.6723	194.876	113.784	110.297	4.8662	0.352706	43.4656	6.06156	10.4587
8.48825	143.509	56.3648	70.4508	4.85717	0.371026	-4.1276	-7.54461	-41.8341
20.7194	123.409	79.0317	126.368	4.85188	0.353431	22.3035	1.75195	-62.07
28.182	170.365	95.0992	146.296	4.86256	0.377751	52.9382	1.86205	-142.104
10.7579	130.894	85.2459	154.424	4.86198	0.377463	-40.8264	-4.17772	67.5969
22.3189	119.11	70.7082	64.8639	4.86365	0.39364	40.1473	7.71087	-31.1041
7.3886	137.587	89.2209	159.253	4.85494	0.349157	7.93867	6.28111	9.3517
11.7477	141.501	78.6527	68.0311	4.86336	0.378667	37.3866	2.44075	-20.2767
9.61985	170.693	83.5747	145.391	4.85109	0.359789	-52.2645	-3.16739	-76.7015
15.3658	169.134	91.0623	117.446	4.85393	0.389838	27.1569	0.640643	-3.78733
8.32578	127.405	84.4389	102.873	4.86388	0.359453	11.5077	-9.13961	-58.8603
9.78578	124.802	83.8976	108.265	4.86547	0.384247	-25.8267	2.32534	15.2319
9.5841	127.563	63.6099	115.258	4.85536	0.354857	56.4354	-3.21802	-53.7848
4.21962	137.172	87.4443	110.36	4.85671	0.353721	57.659	-18.5567	-78.4964
18.1921	135.201	87.6063	135.432	4.86168	0.350709	-55.2578	1.76138	-33.7425
13.6167	125.756	70.7365	120.975	4.85391	0.32776	-8.79768	20.9961	17.6497
25.0678	153.142	68.9213	123.54	4.86184	0.360662	58.097	0.876941	-22.4598
21.8309	168.574	78.6062	147.585	4.86321	0.372697	11.935	5.9205	13.1816
7.82688	133.605	63.1926	72.4823	4.87226	0.389022	41.0886	16.2236	8.0178
11.5893	142.476	86.0669	147.048	4.85303	0.373384	-13.6858	-11.8691	-20.6645
6.41341	139.115	97.3722	130.825	4.862	0.405614	42.9378	11.2883	-68.2963
13.3726	153.127	79.9957	145.388	4.86316	0.358563	13.8908	-23.8299	-68.6445
11.5835	152.944	59.5246	93.871	4.85403	0.340979	-5.04438	-2.78967	27.8922
8.44656	160.368	90.3515	81.7403	4.86007	0.376051	17.7808	15.2494	51.6012
10.7094	141.92	63.9522	73.5326	4.86012	0.382724	15.9856	-3.13713	-4.55677
16.2486	169.198	55.0493	100.475	4.85408	0.348387	20.0667	9.18728	20.8537
16.704	151.205	77.1444	145.45	4.86489	0.351696	-33.8796	-0.270118	-19.2279
13.9015	168.39	64.9091	129.583	4.86417	0.394406	46.1803	1.50813	52.9905
20.1148	148.601	57.3476	124.74	4.85575	0.371027	48.9893	14.0989	62.5197
10.8943	147.831	77.231	100.414	4.85533	0.378003	-8.66125	-4.95168	7.74503
10.3499	170.545	96.4942	107.035	4.86986	0.346085	27.2515	-0.52728	-36.758
6.04729	125.949	52.431	104.469	4.86064	0.356479	-19.5587	-3.96599	-44.8212
19.3358	119.131	58.657	78.6883	4.86207	0.348633	-0.0641784	3.71217	-7.76482
25.1955	166.598	92.5283	135.788	4.86132	0.378781	44.5112	0.476094	-105.763
14.8643	140.695	78.7965	147.292	4.86169	0.373401	-46.2379	-11.7643	65.3549
17.0704	124.392	83.3935	90.4371	4.85343	0.375654	24.5785	8.32939	-22.6708
10.1075	136.544	87.3084	168.433	4.8566	0.35405	-25.1352	10.8135	17.7246
15.5381	116.457	82.155	129.385	4.86526	0.37891	63.6577	11.2969	-19.5283
10.6332	173.078	82.6675	145.152	4.85298	0.37692	-16.5327	-7.61851	-92.9278
13.5794	169.69	103.477	118.647	4.85616	0.400412	6.83829	2.0751	-26.9841
10.9468	159.84	98.6402	115.973	4.85434	0.335098	72.9142	15.7046	-59.4656
8.8312	125.414	79.9746	115.884	4.86297	0.371668	-36.2666	-11.0829	-37.0812
12.1511	125.091	62.3314	125.95	4.85709	0.353234	43.7073	-1.71991	-87.783
7.1059	147.624	97.5654	94.9029	4.85837	0.367948	42.3555	-21.5879	-60.6375
20.1509	132.846	71.57	110.583	4.86541	0.364377	-39.6489	2.04485	-36.7277
17.8028	159.443	85.5984	120.999	4.85758	0.358909	34.7925	11.2617	-25.5013
21.8425	150.69	68.8383	118.012	4.85978	0.365662	50.7819	-3.02395	-24.798
20.8346	165.149	74.161	138.046	4.86333	0.366154	7.4519	8.52252	9.18057
11.9828	130.188	65.7583	59.7225	4.86866	0.363216	10.7973	36.5727	9.53692
10.7554	139.821	68.2296	93.3967	4.85377	0.380611	23.9236	-14.8938	-32.8035
7.54372	139.964	81.0018	102.303	4.86141	0.396156	33.2375	18.8379	-38.2604
5.87508	152.492	90.902	167.419	4.86393	0.34902	-15.8497	-42.042	-85.1888
10.4975	142.667	70.9094	105.752	4.85407	0.349031	15.0213	-3.04156	9.48605
5.08258	160.04	100.286	70.8281	4.86004	0.369281	4.98602	26.8895	65.3668
6.46407	123.35	69.1208	58.8111	4.85793	0.367581	6.32442	-9.72932	-48.4288
18.2212	178.455	58.0737	110.816	4.85477	0.35267	20.9021	12.677	12.2305
9.75407	155.609	105.92	81.1049	4.87062	0.380409	5.21313	27.6903	-71.404
10.2517	159.383	70.307	122.998	4.85652	0.396475	28.1029	-1.70226	-9.03995
16.7833	143.338	67.7864	132.878	4.85805	0.384528	26.0935	7.33597	54.8409
11.9299	151.215	61.6923	38.1546	4.86086	0.396591	21.1823	2.82287	25.5085
14.1983	170.999	85.2423	122.392	4.86143	0.354855	44.7589	-11.707	23.8265
6.49316	140.144	58.1266	112.349	4.85962	0.376354	-7.08712	1.38201	-33.6969
13.907	129.248	57.9463	59.4187	4.86821	0.341288	-4.43478	-4.17986	41.0415
23.1183	174.897	94.5306	116.046	4.86002	0.390238	63.4229	13.9896	-78.1085
16.6064	138.926	66.655	117.279	4.8613	0.374418	-17.5864	-1.56676	9.56969
22.763	135.02	83.8179	109.459	4.85522	0.369519	37.8794	5.48309	-25.7983
7.38815	137.171	89.1584	159.145	4.85642	0.347763	-32.5185	1.60102	-5.77288
13.9655	133.154	74.5785	137.421	4.86194	0.372176	39.6535	15.6743	22.0062
15.0698	157.419	70.6303	125.507	4.85187	0.364072	6.38404	-3.53333	-69.4443
7.39663	150.183	89.8722	107.886	4.85741	0.390238	-19.3036	-0.642021	-7.02921
16.3033	140.277	76.696	73.747	4.85966	0.343719	15.2596	22.2273	-22.176
11.3237	128.616	78.412	125.31	4.85824	0.359719	-9.2027	-19.4731	-40.2398
10.8261	127.403	64.447	132.153	4.85596	0.356057	37.4862	-12.8809	-66.9302
6.95332	133.457	115.97	97.81	4.86195	0.387762	14.4024	-35.421	-69.9571
19.6989	135.108	76.2372	141.506	4.85945	0.362581	-5.37207	-8.71389	-35.1975
13.6057	160.299	83.558	182.493	4.85826	0.352188	-19.4013	35.0716	-61.7661
26.0441	171.157	77.3482	113.266	4.86224	0.373679	126.117	26.5194	32.5305
20.451	166.132	66.454	165.926	4.86338	0.345012	-1.56585	-18.198	-11.1507
14.2013	125.948	70.5475	82.085	4.8605	0.370481	48.4555	31.2087	38.8041
10.6575	141.853	67.8282	100.193	4.85484	0.377151	14.4283	-8.59468	-33.3414
5.24761	135.419	85.4138	119.274	4.86537	0.393047	55.153	26.6561	-79.1341
7.37573	143.597	77.8243	114.848	4.86226	0.36708	10.3963	-35.2327	-52.3914
11.1667	144.57	60.07	87.4641	4.858	0.320804	11.1923	0.414641	49.855
11.138	155.005	92.2799	89.4921	4.85909	0.36984	4.90042	26.8601	-0.299266
2.72579	130.212	73.0402	75.4995	4.86059	0.372113	-17.3812	-25.0922	-54.0827
6.78292	160.101	68.5601	89.9377	4.86376	0.379851	-35.1889	4.22118	-37.62
10.0565	167.434	97.8169	114.483	4.85834	0.396451	33.8289	26.2953	-5.96056
9.57599	139.414	57.5555	123.211	4.85623	0.386192	7.04275	-14.655	-36.264
12.9934	146.803	71.822	118.194	4.8564	0.38451	33.4731	7.33334	39.695
15.1301	169.534	73.8482	86.2099	4.86256	0.395717	37.0265	11.6409	8.62201
13.098	150.608	86.8159	105.56	4.87144	0.340057	-18.6861	20.0816	24.2411
6.99953	141.408	60.0551	111.074	4.85845	0.369658	-22.7482	-6.93628	-29.7627
13.2457	131.099	64.9903	51.9671	4.87278	0.363303	18.6775	18.1184	39.9368
22.0129	183.037	98.425	137.395	4.86044	0.384449	33.4144	3.94098	-65.2394
17.5316	141.527	52.1497	119.085	4.86415	0.366022	-36.7306	3.08054	22.2989
18.2838	133.186	78.4298	98.5587	4.85789	0.365696	24.0463	-0.613651	-26.9159
13.7902	144.169	84.9588	131.689	4.85615	0.357215	-34.2217	1.68773	-48.3379
11.3799	123.592	83.5482	141.968	4.86795	0.345164	10.3287	34.1292	-33.1565
20.5119	158.147	69.5883	113.265	4.8519	0.367228	-10.998	4.81612	-103.715
5.55557	158.104	85.8122	124.438	4.85322	0.416075	11.6686	-12.6876	14.3111
16.9864	140.863	84.3401	92.5148	4.85664	0.352984	30.2092	19.9167	-56.257
19.4063	118.535	79.845	100.978	4.86176	0.385877	-91.6831	16.4159	6.20574
14.8747	137.201	69.1387	133.275	4.85375	0.358216	33.5156	2.85319	-52.3754
5.01608	130.964	116.009	141.926	4.85862	0.384853	0.249011	-45.6111	-93.5064
23.7338	143.616	64.9254	125.529	4.86306	0.365291	22.3292	0.149773	-3.1073
13.3672	152.853	96.9912	138.898	4.85625	0.346721	-54.9728	60.1783	-27.6668
21.7593	151.798	69.557	115.805	4.86248	0.361976	78.551	8.40659	-20.5431
10.3106	168.815	86.2181	188.477	4.85242	0.391097	13.333	-22.1954	10.6286
14.6657	133.144	67.004	108.128	4.85753	0.372384	30.8146	26.8083	19.2347
13.3489	145.481	74.2727	102.528	4.85085	0.361265	8.5551	-4.82444	-54.8427
13.9023	148.778	68.1537	134.477	4.86051	0.371302	34.7514	8.85744	-103.365
8.75196	134.46	76.4355	135.098	4.85921	0.351067	41.3465	-53.1117	-50.3544
10.7338	147.724	64.6682	114.15	4.86143	0.337005	32.7139	2.86782	56.214
10.6311	165.614	82.6453	96.7638	4.86075	0.382964	-19.7748	-12.9356	18.3096
2.39265	129.161	71.3298	61.2838	4.86243	0.368926	18.1418	-14.2922	-41.1865
13.7236	187.797	81.9477	64.0574	4.86832	0.368878	-44.717	57.824	-152.252
0.319597	176.53	115.825	94.0275	4.86315	0.403545	33.5278	-3.873	-9.29486
11.1894	141.83	71.0259	125.835	4.86109	0.384329	17.1038	-7.81889	-10.2375
7.62885	158.862	81.084	153.305	4.85837	0.385752	-31.6343	-18.1965	60.0967
19.678	171.735	77.321	76.3842	4.86334	0.376938	45.2146	29.7918	-12.9781
9.41153	139.454	72.9459	121.023	4.86343	0.361406	28.9516	2.75454	-27.5905
4.3874	135.059	61.2658	105.75	4.8585	0.367969	-32.84	-6.95174	-22.4807
12.4396	129.911	70.768	65.5477	4.86729	0.373366	-29.0779	20.3403	15.3016
21.1167	176.785	86.748	134.505	4.86269	0.350014	40.8108	12.7157	-18.5524
12.7374	136.982	65.1804	113.219	4.86345	0.368888	-17.8476	-4.72485	4.68602
24.8095	145.827	67.54	94.6871	4.85247	0.376027	23.6389	-25.3345	-4.3826
13.9893	135.582	58.7346	99.1728	4.85225	0.3751	-49.7738	-12.8949	-27.0381
11.4602	108.468	88.0758	111.087	4.86282	0.359227	17.7042	7.12425	-41.0408
13.5814	145.259	82.5864	130.026	4.85387	0.36027	-60.9956	-27.724	-103.619
8.07073	141.072	73.6013	110.139	4.85214	0.409778	42.5839	10.0541	68.64
15.3654	147.666	90.1522	78.7484	4.86014	0.351931	30.1313	40.9306	-57.3634
20.0792	119.626	72.1857	128.309	4.85543	0.377009	-16.8976	-5.7746	-48.8875
9.96325	126.213	72.8298	129.401	4.84768	0.343744	-3.76845	-4.8533	7.225
12.3729	122.348	105.239	120.41	4.86562	0.376591	-28.3324	-4.32089	-35.1846
21.1701	144.53	68.7396	137.009	4.86222	0.360285	12.6003	-3.86902	-25.6899
16.6786	139.262	86.0881	124.353	4.85554	0.359466	-39.7894	35.5979	-24.8989
23.0858	131.55	73.8167	137.033	4.8616	0.361757	57.494	-1.59729	-20.7187
22.6717	150.198	79.8371	170.238	4.85295	0.376583	32.3575	4.87646	-31.2895
9.58849	139.267	65.6574	110.148	4.84645	0.369227	-14.8921	15.1788	-31.5404
13.4516	149.022	65.9699	85.6712	4.85575	0.372546	20.3972	14.196	-15.5575
19.1954	154.164	72.5323	137.417	4.85749	0.369932	28.7298	30.0065	-98.9177
7.40614	144.843	76.7849	118.02	4.8603	0.360124	19.1141	-43.5123	-76.235
18.4356	154.094	70.0644	121.318	4.85669	0.353605	56.0694	0.166951	49.0814
13.2598	160.001	81.6276	108.216	4.85943	0.375787	-18.1091	0.679918	-37.2626
7.94626	145.142	73.9442	78.9462	4.86055	0.376404	-21.9993	-14.1826	-62.3429
12.6866	176.392	84.2954	76.2716	4.86533	0.36989	-42.4295	42.4156	-112.828
6.77793	169.859	104.975	95.9299	4.85832	0.370854	-7.95843	38.3667	-35.3501
18.0586	151.94	71.5931	94.8558	4.86143	0.410844	30.8051	6.14097	-26.2289
10.7954	152.891	79.826	116.307	4.86323	0.376633	-16.7202	-4.37385	22.0094
17.1045	176.328	79.5503	107.607	4.85996	0.383306	3.19433	-0.0379772	-35.2922
7.76588	153.409	71.1596	108.39	4.86583	0.318295	45.4914	13.7547	49.8905
5.51261	133.15	88.5436	140.645	4.85563	0.375089	-5.11504	-38.7403	-55.789
12.5353	147.969	74.6702	82.2851	4.8655	0.378221	10.4428	2.64885	-39.4716
18.2093	159.108	81.8187	142.529	4.86102	0.351902	36.1723	-35.1044	-11.0964
18.2026	127.858	69.1821	107.41	4.86529	0.361368	-23.8628	5.94071	30.2835
23.1732	146.21	70.3243	94.4629	4.85349	0.382356	8.37052	-25.2157	-18.4949
5.48992	165.501	73.1503	111.699	4.85739	0.369601	-64.4211	1.4852	-25.7776
14.0361	110.104	82.6297	94.702	4.86707	0.372085	30.8966	25.4786	2.43471
14.8411	129.289	78.7505	119.5	4.85929	0.362471	-17.2897	-3.85611	-68.0066
11.3385	145.298	73.9273	100.931	4.85176	0.408164	38.2995	0.708938	50.1197
11.5634	143.767	87.2885	105.676	4.85441	0.332814	51.4876	24.732	-70.3658
20.475	139.52	71.8873	114.893	4.85862	0.388245	15.95	-17.6441	-71.9197
12.1007	144.419	80.7776	131.632	4.85236	0.3546	18.3736	-8.06185	-51.649
10.6026	148.507	93.0562	91.5865	4.86024	0.390607	-25.2275	-1.53316	55.4878
16.0469	138.91	75.6495	146.413	4.8664	0.364156	-24.9616	-37.4983	-49.9426
17.1411	134.99	82.986	127.77	4.85869	0.356313	-40.4439	27.8572	-34.7654
23.6348	141.93	71.4446	111.355	4.86027	0.37568	42.5398	32.9618	-17.7241
19.6898	149.239	79.9927	142.4	4.85839	0.377862	14.9085	14.1284	-48.5818
9.19521	157.388	60.3995	91.6056	4.85191	0.394679	-5.99656	0.730838	6.8609
12.0024	162.838	69.5913	134.191	4.85484	0.36933	36.0975	13.7576	60.4248
13.8318	175.288	76.8085	161.898	4.85478	0.369757	-9.29107	17.9037	-157.359
10.4178	143.503	85.0658	157.229	4.85642	0.360975	17.1711	-41.8192	-78.8732
16.5138	160.68	77.7384	132.882	4.85602	0.360226	20.4511	14.2467	-21.5571
11.0513	171.533	85.0502	66.071	4.86424	0.368229	-105.213	49.9272	-1.56558
8.02964	136.166	76.6823	89.6494	4.86013	0.383204	-21.9064	-28.8566	-88.7639
14.3013	165.945	71.1598	83.6897	4.86745	0.374319	22.6776	28.2395	-152.935
11.0523	152.193	96.1922	96.3946	4.85593	0.386555	-44.2922	39.618	-22.4663
16.3116	141.343	66.4601	61.3376	4.86198	0.429197	16.8152	9.48586	-55.1764
11.41	168.95	73.1145	146.319	4.86276	0.372209	13.5473	27.4746	50.4895
16.7557	181.426	87.4537	123.491	4.85873	0.390709	12.5532	-21.4215	-4.03806
13.0621	144.059	71.6116	108.104	4.86181	0.329408	-0.517617	24.4563	-3.47041
14.6869	137.103	108.374	168.842	4.86112	0.366448	16.0357	-35.2884	-2.89063
11.6879	137.172	71.0159	54.9302	4.86641	0.383739	-17.2888	-1.52051	-42.8528
17.8169	160.914	81.5587	143.69	4.86074	0.362425	39.8655	-30.4011	-8.80647
16.8212	131.491	68.5198	107.152	4.86364	0.353235	-43.5607	22.0061	36.2241
25.6476	167.637	71.0423	106.5	4.85685	0.37899	9.24247	-34.5103	-28.207
14.9355	142.647	79.5525	133.663	4.86064	0.365696	-61.1166	-5.61118	-84.6882
19.5988	138.952	79.856	130.822	4.8625	0.370866	30.4896	35.8253	-45.8189
9.88758	128.252	84.3228	119.167	4.85516	0.369777	17.2425	-12.1993	-79.7239
8.11219	157.018	75.2575	75.7558	4.85908	0.377027	2.66863	8.08247	56.3887
12.5067	157.255	91.1615	114.868	4.85996	0.345776	73.7947	0.246883	-52.5128
17.0462	140.212	74.1542	87.0552	4.86263	0.394685	23.6791	-33.7371	-117.833
4.94721	149.475	76.8227	77.0752	4.85092	0.374734	-34.9395	1.57379	-39.7935
16.3044	147.148	92.5561	114.126	4.86623	0.395918	-21.5321	-16.8156	13.0152
15.4786	137.516	63.8741	140.061	4.86538	0.362454	-22.1908	-46.4531	-78.2233
19.8829	126.566	96.0912	152.915	4.85616	0.364058	-28.7939	26.8467	-68.4139
23.4698	139.968	67.8801	98.8448	4.86072	0.377038	33.9643	44.5242	-11.806
21.0007	168.41	72.6041	146.59	4.86045	0.387887	44.7122	12.5656	-25.9016
15.1639	152.397	65.4137	84.4204	4.85639	0.392406	-65.6392	-1.65974	-64.9947
13.9852	145.076	73.2143	137.849	4.85625	0.371246	21.9883	26.0156	44.8561
11.5486	170.197	93.2203	117.059	4.85405	0.391081	-37.9326	34.8227	-47.3488
10.7712	135.426	77.451	114.225	4.8604	0.364527	20.9047	-32.3556	-74.2413
17.1638	151.672	76.2316	141.544	4.85465	0.388186	-9.04022	-9.86796	-1.24368
17.6237	143.95	80.0662	114.021	4.86474	0.356945	-11.762	17.6897	-27.6541
10.147	146.919	76.7774	73.6454	4.86431	0.377269	34.3028	-11.0477	-74.0544
19.743	161.768	64.095	99.7791	4.87078	0.360127	25.3822	11.7769	-75.3495
12.8743	151.683	80.0229	79.2553	4.85621	0.393815	-9.86793	22.9211	-40.386
12.8156	142.8	59.5633	91.4163	4.85875	0.400388	51.5494	-22.4591	-101.334
10.3127	153.244	73.1654	95.8011	4.86495	0.384483	-4.48876	10.3917	1.32901
9.32612	187.186	105.064	145.999	4.86255	0.397296	42.7027	5.22522	2.2811
16.2036	154.074	84.5145	134.156	4.8605	0.337198	68.6388	6.49564	-56.9516
1.624	124.954	109.263	164.281	4.86096	0.361902	-13.8883	-3.73788	-28.26
16.0314	134.659	79.6272	71.5958	4.86586	0.388371	-16.565	-1.00536	-30.1134
17.6316	146.928	92.2605	174.541	4.86306	0.359993	44.1303	-57.3213	-24.4279
15.2875	142.469	63.3251	124.878	4.86001	0.354447	-43.0041	-10.3158	44.7509
25.2267	167.344	70.9589	110.01	4.8551	0.381118	15.2352	-38.6347	-28.709
11.384	144.41	76.6211	166.656	4.85552	0.362834	-119.982	-24.4304	-78.9408
22.406	142.796	78.7636	110.373	4.86277	0.373059	46.2147	12.4021	-48.4897
7.86475	136.445	78.8017	134.495	4.85419	0.35882	29.5791	-4.60322	-26.1348
10.2187	154.456	82.6398	60.1793	4.86333	0.382638	-29.6737	-13.7486	-9.79301
13.9465	171.039	58.8953	73.6726	4.86169	0.402474	32.0532	-13.1281	-95.7599
23.2303	143.888	72.2451	110.206	4.85898	0.386016	32.7536	-1.36902	-84.9005
2.64362	151.739	78.3477	93.8128	4.85431	0.377114	-41.0339	-32.4467	-31.0524
14.5995	134.833	83.7434	110.459	4.86509	0.382756	-12.9427	-8.69829	34.6677
20.0485	135.051	72.1768	139.986	4.85987	0.364753	-19.577	8.08698	-60.8259
21.2024	126.092	91.7091	150.558	4.85592	0.36383	-21.5699	23.8132	-68.5172
27.3033	149.313	64.8919	103.356	4.8586	0.394008	24.2214	51.7988	3.06701
15.9423	163.498	72.687	134.267	4.85936	0.368154	-17.9603	-9.31327	-21.8296
18.624	144.004	61.4595	71.7828	4.85858	0.379669	-74.4214	-1.15418	-65.9043
10.2828	133.442	77.4274	127.079	4.85362	0.364586	-10.4141	27.1982	54.2115
15.9248	169.01	85.0573	124.772	4.85362	0.396664	-31.1865	22.4726	-17.8357
11.4824	132.804	73.0454	83.1487	4.86623	0.360372	88.1181	-13.0121	-89.3477
12.5797	155.518	98.3273	153.039	4.85541	0.40361	3.98465	14.2482	75.8235
15.2962	158.207	92.5244	103.74	4.86645	0.356528	-18.0689	28.0861	1.29321
10.5119	128.217	81.3171	77.3638	4.86678	0.369058	-11.8745	-12.7334	-39.4312
19.3529	163.456	74.5886	152.695	4.86048	0.373538	-2.66609	-27.6545	-24.1219
17.5253	150.111	91.0055	98.9629	4.85973	0.398355	7.80069	-0.0616848	-87.7145
10.6627	136.698	84.4984	169.563	4.86461	0.361428	66.5073	-32.4307	-63.4035
6.73229	143.467	82.6912	65.7408	4.86947	0.361612	0.0293726	20.9894	9.95211
9.09405	175.734	92.1049	111.119	4.8665	0.373314	37.0321	25.5183	23.8963
17.7996	158.636	87.0469	127.739	4.85867	0.343925	64.6979	11.1694	-20.5499
9.36388	113.162	94.6096	129.059	4.85632	0.375296	-48.3748	24.4988	-44.2405
15.4895	131.064	76.0152	60.4894	4.8683	0.382379	39.4678	-3.95905	-47.2607
19.0901	146.602	91.0377	175.838	4.85941	0.361943	2.51414	-57.4961	-22.6594
12.4907	131.027	64.462	130.527	4.85611	0.352809	-48.4106	-22.9984	18.0748
22.1711	161.965	80.1571	148.299	4.8551	0.37259	26.4311	-12.0897	28.8144
23.3195	146.056	74.3695	124.641	4.86093	0.390423	-74.8309	9.65558	-4.08391
23.5587	143.118	64.823	131.762	4.85797	0.357772	29.9554	17.6762	-12.6758
9.89594	118.472	77.9761	117.11	4.86219	0.337659	-24.0325	-28.6587	-33.4576
5.68927	154.621	90.2145	47.539	4.86273	0.370491	-23.0387	-14.1649	-27.9903
12.9452	157.303	73.0907	63.1399	4.86392	0.391834	25.8872	6.16878	-37.6284
24.295	152.819	86.1797	82.794	4.86118	0.397398	56.302	10.3966	-90.3083
9.72388	164.274	79.2288	132.901	4.85266	0.370265	-8.97635	-5.48024	-61.0537
11.4833	123.828	86.8997	85.4667	4.86807	0.379542	-43.4769	-5.24646	53.7461
14.5993	121.915	70.4169	131.136	4.86217	0.35189	-5.83692	-11.6672	-76.1467
21.4669	123.187	97.0229	148.293	4.85853	0.371803	-30.2828	29.4173	-23.7411
19.9827	162.598	78.6952	157.049	4.86084	0.373206	6.93884	1.16418	80.4235
16.9153	172.665	67.8926	155.409	4.86154	0.363798	24.1546	10.5496	50.6271
25.2894	136.567	60.0431	95.7345	4.86269	0.361838	-17.8654	3.71431	-46.7381
11.7138	122.885	78.1028	158.614	4.85285	0.37258	15.7967	14.5218	-3.44393
17.3999	182	88.4576	127.273	4.85521	0.410034	-65.4215	17.6662	-45.0937
20.8678	133.267	87.2806	135.591	4.85639	0.362425	93.2555	-45.1256	-61.5976
10.2907	121.561	85.7615	136.617	4.85641	0.355949	58.1844	5.59464	35.8462
18.1892	171.966	91.0928	136.937	4.86183	0.35494	-71.3114	36.2503	54.8312
6.29873	145.032	95.2133	73.3941	4.87175	0.400927	-0.171596	17.7728	-35.1615
19.5793	165.545	75.4832	138.909	4.85984	0.384108	-31.3513	-17.3657	-15.0745
22.3867	170.853	97.1944	147.539	4.85553	0.382847	18.5344	-17.0369	-96.3294
9.74562	132.096	84.3414	149.734	4.86181	0.366501	75.8946	-23.5051	-91.2348
9.22007	125.39	79.6886	87.7366	4.86735	0.352855	11.9465	-4.34113	-35.469
9.23406	189.988	94.491	120.512	4.86798	0.387243	19.2629	23.679	51.3968
22.8749	155.061	76.8982	147.194	4.85454	0.362458	36.4478	12.1231	-48.6547
10.1209	148.396	100.658	88.0701	4.85927	0.390612	3.56922	25.837	-39.5789
18.551	167.69	92.8731	73.7529	4.86307	0.413144	49.5095	12.3101	-39.0779
18.3336	139.758	90.3622	184.478	4.86261	0.361738	-22.0633	-46.6108	-58.7453
16.0517	162.229	73.2265	116.838	4.85866	0.39139	-5.71631	-2.60383	-15.8001
24.9186	156.384	80.0177	163.526	4.85358	0.372169	40.419	-17.7306	44.7653
19.2991	146.013	76.3686	109.121	4.86108	0.381356	-44.6678	20.7787	-52.7064
16.0402	150.912	76.8081	146.681	4.8545	0.357967	-12.8956	-22.7579	-69.6659
16.7906	128.168	77.0657	116.587	4.861	0.352982	3.94499	-23.3069	-52.8889
12.8077	135.729	72.0766	78.1481	4.86004	0.359333	-33.7977	-18.2797	35.4794
11.3619	164.498	78.9634	111.891	4.86442	0.39054	61.0842	-10.3272	-61.2794
26.329	149.876	101.149	112.927	4.85527	0.407788	68.598	14.2848	-82.571
6.70931	175.255	66.1773	100.018	4.85384	0.378867	0.540989	25.6266	-39.5023
10.6229	143.657	113.423	130.602	4.86331	0.395665	-14.9329	-24.062	-3.57146
14.1185	125.866	72.9077	148.865	4.86482	0.343719	-42.5841	-7.67579	28.6826
21.7824	140.55	99.7336	144.146	4.85912	0.373749	-10.354	26.3091	6.83401
17.0175	156.078	86.4558	144.75	4.86045	0.376803	-8.03675	-4.88386	19.9913
12.9536	183.12	77.8119	170.55	4.8642	0.37609	11.0128	3.33314	27.3772
25.9181	135.59	58.7366	94.6303	4.86217	0.367551	-8.26628	17.9415	-65.3769
11.3447	138.864	82.3918	138.844	4.85653	0.37985	18.8784	-5.19946	-9.63219
13.5249	142.032	80.2006	122.242	4.85361	0.387629	-39.9769	26.4786	12.6334
16.8987	151.619	87.9787	149.018	4.85196	0.368679	46.3324	-23.7801	-30.8168
11.0637	146.752	93.2114	152.121	4.85251	0.381628	75.613	10.246	40.8654
14.9258	134.149	89.8993	82.7918	4.86169	0.365507	-33.0329	19.8636	-8.0179
10.3768	128.307	58.8504	115.268	4.86367	0.373646	-14.3771	-18.9408	4.07926
15.0645	175.801	96.1486	167.445	4.86183	0.39278	-61.9799	-50.0327	9.91974
16.0112	180.083	93.8194	120.161	4.86075	0.393891	38.9279	-1.49734	-81.6077
5.05286	146.679	89.1539	164.79	4.86192	0.37647	101.301	-42.5158	-98.9994
12.5879	122.008	79.7147	120.614	4.86584	0.347049	-12.0008	-15.8177	-0.0894104
18.8194	165.499	105.446	139.458	4.8608	0.38053	-22.2996	-23.3585	-81.171
18.5711	150.801	67.8866	100.241	4.85895	0.382307	55.9696	27.8301	-66.3783
7.86863	149.522	105.766	70.2374	4.86037	0.398219	1.68953	29.2249	-47.7132
10.069	168.688	73.0493	73.9734	4.86061	0.381965	16.3159	-6.89263	-8.6103
22.8059	182.009	82.3567	146.266	4.85738	0.371423	-47.6733	-87.9301	-26.4619
12.0929	160.113	80.7099	120.561	4.85889	0.392227	12.2016	-10.6756	-6.14716
17.4213	163.393	82.2387	91.1101	4.8629	0.390284	35.5483	-19.2775	-38.654
13.4607	138.232	78.8809	141.539	4.86357	0.36933	-53.6459	-3.71492	-41.4379
12.6333	136.895	80.5247	147.59	4.85592	0.355223	-21.1988	-18.6284	-43.1925
23.3549	146.003	68.6136	104.721	4.86189	0.365999	39.816	-12.0646	9.6875
13.1819	116.676	60.423	62.8208	4.86253	0.361412	-32.8399	-8.29237	35.1084
12.9624	184.213	69.0725	97.4206	4.86776	0.394877	78.6424	-14.6587	-73.9269
20.3638	143.091	91.1361	117.611	4.86513	0.369309	29.0472	-3.46784	-40.9201
15.2491	141.253	74.1238	154.582	4.8518	0.350936	-46.5796	1.8935	-116.977
14.6591	123.607	100.82	124.348	4.8702	0.371218	-3.30104	-42.855	1.12705
19.6914	161.642	73.8073	164.049	4.8615	0.365568	6.1045	19.8986	56.3778
21.5652	147.428	101.498	180.156	4.86236	0.378611	75.5239	3.89236	18.4016
19.6008	126.412	82.2099	84.447	4.87033	0.357784	4.49146	28.249	26.8655
13.2524	162.775	83.2819	143	4.86023	0.37315	12.6977	9.24151	9.34005
18.4447	139.39	67.5397	105.473	4.85432	0.366168	-49.7121	7.42599	-27.8859
10.5386	135.215	83.4359	112.053	4.86349	0.386434	50.8143	-12.1732	-7.45634
10.7117	146.414	100.008	115.032	4.85625	0.394422	-22.4124	27.249	-7.63275
17.515	133.678	81.0961	130.078	4.85358	0.359439	42.97	-19.364	-13.6942
3.66695	150.732	76.4749	134.814	4.85196	0.395378	42.4969	4.32239	32.2527
18.4955	134.192	125.538	84.7681	4.86738	0.375836	-23.0936	56.0608	53.2961
16.9323	122.098	70.1275	123.724	4.86303	0.370224	15.0914	-15.2309	-3.41344
16.2996	176.892	97.4783	139.7	4.864	0.390879	-69.5609	-34.0991	23.1792
8.39348	156.478	92.3776	138.443	4.86179	0.386371	22.9912	-2.12346	-92.7696
10.8831	145.511	76.2039	118.301	4.86083	0.366762	7.62878	-21.7188	-43.5434
15.2994	144.102	94.2469	151.409	4.86645	0.353914	32.0322	-8.74923	-27.8202
22.3608	198.125	128.09	93.6765	4.86882	0.397322	-50.6261	-19.2779	-131.781
28.3773	151.067	81.1798	107.504	4.85451	0.379251	9.56538	40.4217	-29.7033
10.7216	135.607	134.54	81.0157	4.86156	0.392622	27.7738	42.3466	-44.1219
8.50114	200.553	63.6227	78.499	4.86167	0.378031	38.8101	-28.5133	-4.16327
20.1952	177.562	79.3714	137.41	4.85471	0.380703	-33.3971	-47.9352	-40.5012
13.6903	166.503	78.7316	143.397	4.86196	0.396627	48.7416	-14.167	-19.7941
18.3181	143.974	74.8716	69.0921	4.86353	0.37635	5.13095	-17.4568	-24.9502
17.8119	137.502	80.9475	133.004	4.86207	0.371001	-54.178	9.5946	-53.2291
12.4634	130.673	69.6284	151.325	4.8513	0.349933	-32.8715	0.585231	-69.392
23.0399	132.343	78.5862	115.561	4.86154	0.360018	21.4329	-1.23515	27.4744
15.1532	125.092	60.3259	38.1549	4.86003	0.370061	-26.0979	4.02747	-1.83828
22.1149	178.717	85.2105	119.365	4.86105	0.406838	75.1367	5.05575	-40.261
19.3473	132.272	104.413	142.02	4.86743	0.373068	11.3201	-7.07723	-96.167
15.1061	150.437	84.707	127.911	4.86194	0.372023	-23.9929	9.85607	-115.047
12.1587	125.008	89.6771	127.631	4.86562	0.368157	8.82689	-36.5676	-8.54609
19.0143	179.274	71.5728	140.794	4.86641	0.367369	-20.2549	9.28754	119.19
18.8419	140.493	87.0666	147.475	4.86011	0.373912	28.4617	-6.77091	-4.20651
15.2851	144.682	84.3856	91.4043	4.86692	0.374428	15.4055	8.1762	-19.2349
8.57316	163.63	81.6087	132.871	4.86054	0.377378	13.5615	3.43329	18.8445
15.7533	136.069	72.1849	70.506	4.86315	0.361236	3.96232	13.0884	-46.6522
9.09461	120.822	87.3043	132.127	4.86113	0.367032	50.0727	-17.5073	-16.2114
5.99931	122.179	101.762	113.64	4.8545	0.357545	-38.0663	54.1095	-26.6357
14.1839	148.779	82.1353	118.43	4.85447	0.365222	7.95345	-38.2584	-35.3508
10.2578	139.738	82.1718	80.8981	4.85944	0.388218	-13.8224	24.0707	1.92303
20.0934	132.634	96.9067	81.3202	4.86673	0.363335	42.973	22.5751	-27.6298
14.9303	135.998	72.329	141.953	4.8626	0.366378	32.0686	-27.9738	-21.3298
17.8482	150.261	93.1543	135.685	4.86379	0.384133	-27.484	-27.8107	16.6247
8.61969	153.731	91.0807	123.623	4.86103	0.393198	13.5061	3.12059	-89.3326
10.1447	137.551	64.9613	93.3276	4.86447	0.347918	9.02148	-34.3563	-73.5342
11.3705	138.455	81.4757	161.932	4.86234	0.351307	4.42614	-17.2585	19.5388
22.9123	170.401	97.2564	102.316	4.86074	0.38146	8.12449	-11.3456	-33.3312
25.6181	150.643	61.4958	109.876	4.8549	0.369547	25.3803	5.65572	-43.6212
14.4612	131.337	86.6854	113.483	4.85674	0.362241	20.1716	-15.7106	-50.6562
16.3767	163.846	55.5606	65.2496	4.857	0.367853	30.9357	-22.5932	8.62834
17.0219	141.132	72.6614	100.516	4.86061	0.375516	-26.0224	-31.2505	-25.5606
12.8655	162.111	65.8539	129.303	4.85964	0.380371	47.6921	3.44415	-22.4926
22.6659	147.519	77.5843	60.0145	4.86629	0.364941	30.3342	-4.17902	30.9561
26.9061	149.414	71.1243	160.538	4.85981	0.363515	-66.2616	43.0388	-106.488
10.0285	145.567	95.164	118.403	4.85839	0.382544	-55.4568	-34.6096	2.11242
22.003	147.539	74.809	78.1584	4.8627	0.358357	49.5272	17.994	67.7909
17.1196	131.809	62.2465	50.4219	4.86021	0.373274	-12.0439	-10.611	-18.6683
20.2487	187.614	83.0274	125.52	4.86258	0.413396	93.5181	-26.3139	-26.4965
22.5695	134.644	100.081	120.454	4.8661	0.377287	13.1483	13.1185	-103.652
15.1514	156.917	84.4263	125.751	4.86079	0.374909	-48.172	15.0689	-139.035
11.2786	135.198	95.1232	147.206	4.86387	0.375502	32.4459	-39.7814	-9.56755
9.42958	156.7	86.94	143.542	4.86708	0.35038	-22.0383	0.750892	41.5081
23.1599	148.038	99.0588	135.933	4.86092	0.379877	14.1799	-0.336734	-45.2756
15.4848	144.71	89.0414	74.4099	4.87477	0.375401	19.9815	26.4879	-6.74319
8.79349	146.038	90.8419	125.842	4.85666	0.371364	-37.397	29.8641	29.3911
20.318	136.162	67.6416	49.9177	4.85785	0.373057	-24.1264	26.7675	-38.9571
17.8658	126.396	85.6146	138.682	4.85883	0.369332	53.9316	-5.00446	-3.06731
8.46424	130.351	99.7378	129.656	4.85259	0.352294	-15.7489	28.0654	-50.5587
8.76144	173.303	103.565	139.337	4.85354	0.374266	39.3631	-28.3326	-61.9398
5.95831	135.325	75.5789	84.6736	4.86301	0.404598	27.6062	22.3584	5.08324
21.3908	155.726	89.4486	80.2766	4.86467	0.384352	82.1248	-10.3037	-42.628
13.5285	133.098	70.3908	139.041	4.8619	0.369696	12.698	-37.3841	-43.7021
21.8098	147.793	88.0994	119.034	4.8602	0.388918	-76.0371	-40.0411	-2.93986
12.5013	162.421	89.6251	96.8453	4.86084	0.405001	17.4789	-5.56818	-111.347
10.8545	140.465	60.6408	94.59	4.86256	0.350685	22.1577	-20.7151	-82.7685
12.4562	148.501	93.819	165.569	4.86325	0.343505	43.9885	-6.69287	70.0204
12.1678	180.846	112.229	88.198	4.85926	0.38162	-106.647	8.03627	-40.6846
19.9458	153.738	73.314	120.073	4.85612	0.376424	5.08093	-5.55842	-55.6744
16.4592	148.147	105.369	117.342	4.85418	0.35669	-6.74028	-29.708	-70.6274
16.1039	159.902	81.5134	89.5982	4.8641	0.377551	34.8349	-10.06	-2.4178
14.9804	131.222	73.6667	102.754	4.86744	0.372084	-19.9821	-36.5882	-24.6353
15.0182	152.112	75.675	106.53	4.86221	0.384364	40.2613	13.6963	-35.0346
21.4968	142.5	75.7567	58.7124	4.86685	0.362331	22.7399	0.936862	21.3415
16.9932	142.281	83.1805	140.027	4.8586	0.369819	-38.8299	41.1665	-95.5546
7.09504	118.392	73.4168	129.914	4.86346	0.370129	13.6599	-3.36062	-61.8035
23.1232	135.702	76.998	81.6386	4.86205	0.37101	16.1037	20.5295	38.236
21.1851	122.212	57.0948	66.5573	4.8641	0.376598	-22.0192	28.8411	2.71018
17.0436	184.838	75.7669	132.616	4.86088	0.410392	83.1269	-36.8186	-18.4785
19.1383	139.187	101.151	121.337	4.86425	0.378824	20.6333	-8.28819	-66.5004
12.8345	162.625	67.2086	101.678	4.85988	0.380494	-36.4187	-0.318077	-150.651
12.5058	129.663	114.357	146.922	4.86863	0.359578	27.8042	-31.544	-34.6962
16.1129	148.125	74.787	113.511	4.86574	0.355993	15.1609	0.38911	75.688
27.9441	155.139	88.7246	176.844	4.85522	0.359847	3.41277	-11.0932	-73.5645
10.6104	144.389	80.4983	96.9315	4.86557	0.372001	-1.08581	14.3982	-8.30594
14.0013	154.827	87.1289	134.298	4.85986	0.392978	-71.6186	30.478	19.6474
15.9569	140.94	71.7809	74.5941	4.85955	0.379977	-14.3754	17.9288	20.6359
19.1732	124.319	94.6088	160.412	4.85912	0.363445	2.61211	11.8933	-41.6574
5.44968	135.954	98.44	127.541	4.85497	0.350387	-14.1278	29.8611	-3.70014
1.7756	186.181	89.2329	134.393	4.85215	0.379204	44.6495	-2.79272	-77.7815
6.80664	156.354	56.7067	70.5635	4.85311	0.390663	41.2621	7.79736	-23.9297
23.0933	139.491	72.2023	79.1171	4.86505	0.382169	64.6105	-9.82432	-55.6293
12.5066	140.878	64.2421	142.25	4.85759	0.380252	1.61258	-46.1914	-17.359
21.6931	141.275	83.5368	112.189	4.86119	0.385655	-30.4207	-17.1273	16.4426
13.8144	158.97	93.7284	106.339	4.86547	0.394404	35.9275	2.15913	-38.5839
8.60232	143.16	71.5467	79.9891	4.8683	0.365809	53.5534	-37.9903	-119.839
11.145	167.184	87.5114	125.97	4.86508	0.33504	72.0434	-14.0947	98.0769
14.4563	176.482	121.358	132.362	4.86218	0.369481	-23.5326	-32.7017	34.8652
19.0101	174.932	70.5172	110.567	4.8514	0.383254	24.233	-14.7384	-40.3477
12.6519	131.857	82.6442	140.683	4.85403	0.367782	-37.3732	-27.1117	-69.733
20.1056	163.287	90.4834	110.931	4.86051	0.347105	28.2804	-27.7785	-26.3236
13.5167	145.522	80.0505	118.67	4.86462	0.370169	-19.2444	-18.4364	-25.838
7.78718	133.702	82.688	95.9138	4.87284	0.382759	54.1532	66.7777	9.03454
19.8191	142.735	85.0956	78.2475	4.86564	0.347193	45.4336	8.8205	-18.0385
23.5164	122.759	100.358	150.223	4.86066	0.35877	4.96567	25.1218	7.88299
1.81012	138.257	111.707	174.42	4.86474	0.387134	18.9222	-5.66493	-80.8173
21.5474	131.346	83.4828	133.842	4.85622	0.368063	28.6632	5.0677	11.153
15.0245	125.699	53.5309	92.9995	4.86112	0.352378	13.2556	15.438	-65.6518
12.8745	161.414	86.9631	130.377	4.85464	0.361593	35.9579	5.41657	47.3228
17.429	130.299	89.7218	122.089	4.86375	0.357441	38.6921	4.21765	-82.3554
17.6343	137.915	76.1094	108.892	4.8676	0.361522	-45.3626	3.60509	-73.021
12.1425	137.484	106.279	110.654	4.86663	0.362815	19.9252	-24.1373	-25.2384
16.2275	141.281	75.605	131.876	4.86154	0.35177	22.8961	7.05877	51.6451
23.1933	152.727	75.7943	141.19	4.85663	0.380698	5.96446	-15.7228	-107.857
15.3792	137.432	77.7377	120.928	4.86541	0.373996	2.80283	10.37	-22.0978
15.8696	152.388	91.5702	134.097	4.85983	0.385309	-72.4412	27.5785	16.0657
14.5484	135.917	71.8611	84.5658	4.862	0.365355	-26.4392	20.9538	35.5687
19.1005	122.911	94.4328	156.751	4.86065	0.377412	-7.41907	13.4537	-31.8274
1.3806	134.033	104.023	133.142	4.85316	0.341215	-24.591	46.4776	30.5561
22.9736	168.654	106.108	140.66	4.85619	0.36789	46.9248	-5.32502	-22.3216
14.6934	156.13	64.7778	135.76	4.85356	0.398635	26.2507	-12.2631	-43.034
20.9236	125.087	64.3744	87.5559	4.86291	0.372145	50.5985	-4.1916	-90.2335
14.6891	138.521	70.9853	127.11	4.86191	0.372095	-10.8718	-25.1793	-48.014
21.8481	136.608	84.4755	124.675	4.86159	0.383589	-39.7768	-29.4005	10.767
14.6123	151.235	91.3075	95.3986	4.86284	0.378769	18.191	-9.50342	-59.6453
11.5321	147.753	96.3382	106.289	4.86216	0.372486	67.2391	-39.2995	-42.1621
9.20618	143.857	76.9477	150.527	4.86063	0.357351	41.4445	-18.2636	-1.11765
17.8233	158.682	96.7271	110.626	4.86261	0.373353	-27.4794	-21.9557	5.1808
15.9458	154.964	84.9487	121.561	4.86044	0.370431	8.26979	-39.2083	-68.4812
21.9338	125.809	76.3206	132.076	4.85708	0.374619	-32.5214	-29.2331	-52.6495
15.3107	137.371	96.4786	119.269	4.85794	0.344066	3.68946	-12.1294	-51.6838
9.44411	151.503	71.6649	116.908	4.86505	0.388286	9.27527	-38.7113	-71.8874
13.2627	143.848	64.9465	80.4001	4.86277	0.379566	37.9814	32.6186	-39.745
18.2637	146.426	81.3903	87.3962	4.86555	0.360646	28.6783	17.6376	-30.0864
16.8964	130.914	92.1427	149.797	4.85874	0.363311	16.6102	17.5802	-16.1415
2.94837	150.563	86.9611	155.583	4.85843	0.380129	30.4789	-4.85271	-83.004
23.1434	134.626	91.0352	125.098	4.85569	0.379088	21.9114	2.67811	-19.8962
13.0853	131.886	56.4692	88.6727	4.86097	0.358479	13.076	11.406	-54.732
12.1781	155.326	74.9321	132.531	4.85641	0.361162	11.697	-10.495	23.5423
22.6182	120.437	71.889	100.373	4.87043	0.389532	45.3993	42.2759	-95.605
13.8075	154.477	73.3708	99.3879	4.86614	0.36719	-46.6273	21.6024	-32.5717
12.4513	140.625	104.488	107.469	4.86744	0.366885	27.5655	-19.3042	-57.7416
19.2583	129.907	66.9284	139.183	4.86196	0.374325	50.389	4.79723	-44.1661
23.5878	156.032	59.0743	113.283	4.85748	0.371559	15.0493	-14.387	-142.865
16.5814	134.67	86.3258	123.263	4.85906	0.379958	16.8395	-6.23977	-10.7575
11.3491	161.909	94.6406	149.833	4.85776	0.345877	-5.23013	21.1713	15.7532
11.9624	158.267	81.4922	77.2859	4.86773	0.36154	31.828	-1.5754	-0.60142
17.2656	129.507	93.2365	149.506	4.86037	0.378291	-0.865332	12.329	-14.3364
12.226	130.261	97.3311	106.547	4.85652	0.360904	-29.4638	25.5696	10.0743
20.7656	162.41	103.214	147.147	4.85756	0.360811	36.4622	-3.66248	-0.698439
15.2879	153.888	67.6967	142.378	4.85886	0.382192	24.5638	-18.5715	-64.9934
21.2532	135.173	65.6722	75.533	4.8601	0.368301	35.43	-12.3062	-84.2291
10.2513	125.618	74.0595	134.07	4.86629	0.360651	-15.1278	-38.6563	-63.7885
23.3071	126.959	80.4557	118.376	4.85837	0.389172	-25.4917	-22.1955	8.41665
14.2308	164.539	76.5306	59.6395	4.86059	0.392049	33.9166	-11.7282	-72.9303
14.0323	153.717	89.947	113.319	4.861	0.388264	64.4973	-32.235	-51.8905
8.79886	147.821	77.9171	160.43	4.85798	0.349955	35.7982	-57.8576	11.5702
16.8845	133.239	83.0504	83.9695	4.86669	0.369381	-44.6798	-33.2102	-41.9788
18.8743	148.609	75.8665	128.162	4.86235	0.328024	-13.3274	-16.5705	42.4671
12.0863	134.565	93.0522	116.2	4.85818	0.364215	2.85567	-39.1622	-73.3961
14.7147	131.114	88.3	139.096	4.85717	0.320706	14.5974	-11.0988	-43.5391
11.0712	153.628	79.9546	97.377	4.86255	0.403757	24.0774	-61.2301	-89.8019
16.7397	141.922	58.8101	83.3649	4.86225	0.367132	35.1707	21.1469	-30.3607
21.4985	147.727	82.6709	104.492	4.86637	0.358324	50.7917	8.06668	-63.2785
14.6371	120.62	84.7154	157.94	4.85714	0.377978	21.9953	20.8981	14.2444
8.49559	154.052	80.9428	112.394	4.86339	0.366228	32.4941	-0.432006	-56.7165
24.2166	134.374	80.4923	121.059	4.8558	0.376675	14.6409	14.1446	-21.0727
13.8938	143.203	59.1009	61.6914	4.86205	0.350689	-20.9935	22.6282	-64.8754
13.8948	151.604	62.9477	90.0735	4.85831	0.356202	22.8374	-18.2702	-25.6848
15.8024	128.1	97.3022	157.447	4.86825	0.359494	32.173	-45.2966	-68.6894
20.8483	195.248	80.441	143.897	4.86205	0.381068	-31.4923	15.4572	-8.35834
12.4	143.78	105.203	93.4947	4.86665	0.366454	19.942	-56.1515	-35.9285
11.5438	130.715	61.6132	133.725	4.86676	0.369593	70.5833	5.00546	-22.6487
20.3045	143.734	74.6482	97.4814	4.86336	0.379072	0.602935	-30.5181	-178.473
25.7515	131.752	96.2228	107.085	4.85595	0.39638	21.3147	17.3394	7.15545
7.85271	166.714	72.0436	103.804	4.86259	0.340399	-7.95154	27.0577	-21.9311
9.3668	172.043	94.0916	89.7373	4.87102	0.369076	55.7464	-38.0429	57.7833
14.7314	127.215	90.9968	132.112	4.86202	0.391454	-13.8454	13.1971	-44.5993
1.91884	156.518	102.602	136.109	4.85735	0.382311	-19.1638	31.9334	-70.6703
20.6551	161.758	85.2491	106.61	4.85768	0.36469	45.0529	-17.1243	-39.9173
14.9144	149.921	74.8463	137.87	4.85967	0.377862	23.8196	-20.9325	-57.6066
24.1831	137.576	74.4178	145.831	4.85616	0.344725	52.4349	-52.9692	-48.5919
15.4825	124.549	83.9126	130.47	4.86533	0.364671	-7.19674	-38.7601	-46.576
28.0038	116.582	79.736	105.024	4.85876	0.368029	-37.6483	-16.5159	15.7534
5.18391	158.956	95.3773	88.4432	4.85718	0.409641	-19.5842	6.37755	-73.1778
12.1139	151.69	70.7633	102.681	4.85861	0.370649	73.5995	-19.1445	-21.8591
17.1081	139.879	78.8128	153.834	4.8606	0.373636	77.7008	-30.5088	42.8192
19.0207	131.309	88.173	99.1164	4.86669	0.372002	-32.0382	-40.6159	-25.9943
21.8717	155.317	62.7694	85.7669	4.86818	0.331693	29.6712	22.0706	35.2517
8.22244	139.48	97.4405	122.256	4.85203	0.369402	-59.714	-33.1475	-71.5738
16.971	143.306	76.1971	97.1692	4.8576	0.352172	31.6034	-5.74138	-70.0367
6.5217	157.19	77.3486	89.8391	4.86282	0.389395	14.3238	-53.0551	-37.8483
16.5658	137.392	76.1357	90.646	4.87062	0.388912	23.8658	5.94533	-17.684
18.7768	157.978	83.0419	58.0591	4.87167	0.35741	56.7514	7.30286	-72.2116
14.4508	122.61	81.3266	172.98	4.85833	0.376997	29.2002	23.6273	39.2565
4.9673	140.603	86.1725	107.012	4.86369	0.37578	28.6001	-0.663899	-0.608006
26.6112	130.115	92.9934	115.349	4.85068	0.381886	-14.9072	21.8846	-12.9982
15.3246	141.969	61.1439	61.7624	4.86231	0.366584	-3.06432	37.1918	-68.2415
18.3971	142.383	53.7743	115.483	4.85593	0.346832	22.4321	5.57098	14.6234
11.2428	122.566	107.539	147.795	4.86524	0.378057	12.117	-41.0636	-108.43
17.8824	200.03	70.6435	119.716	4.86393	0.375876	-32.175	5.7525	-66.657
5.60695	164.653	110.108	136.303	4.85385	0.37822	36.4564	-47.284	-67.1606
17.0126	148.772	69.2696	104.898	4.86055	0.369053	77.7915	11.0932	-16.181
17.8925	140.582	73.0588	114.786	4.86623	0.38548	24.7952	-31.9343	-123.966
11.0254	153.815	83.5299	110.448	4.86315	0.380232	18.1668	35.7366	55.2676
9.19108	165.063	77.3659	106.664	4.86735	0.383445	-2.10508	37.4377	5.14
7.71008	168.897	112.122	129.267	4.86374	0.368957	59.1596	-41.3936	116.887
11.9961	132.163	79.2431	135.039	4.85978	0.379048	11.2941	3.20104	-33.7716
12.5131	130.91	64.6865	118.635	4.84959	0.342126	-7.24105	41.6284	-52.1558
25.1706	172.967	61.1432	87.103	4.86242	0.383643	70.213	1.85312	-51.7347
13.7849	170.435	78.7469	169.485	4.8578	0.398155	-31.8347	-62.1263	-110.04
22.3838	142.238	79.3699	101.827	4.86394	0.362958	9.68148	-37.4892	-70.1271
14.6873	126.049	87.0157	160.241	4.86371	0.34786	-2.67241	-50.0532	-13.4904
25.2629	130.601	77.3852	98.3373	4.86596	0.356188	1.473	-43.2492	58.126
5.27591	150.351	91.7189	65.9299	4.86329	0.399598	-13.3618	15.2188	-51.0233
11.1516	142.306	61.2112	108.904	4.85366	0.359134	105.07	8.85873	-51.1043
16.9425	135.355	75.9935	150.813	4.86236	0.3699	80.4322	-5.17975	45.7077
19.8927	132.307	82.3311	101.726	4.86637	0.378489	-12.044	-16.5627	-16.3395
19.9469	151.567	67.7374	111.296	4.86859	0.354348	18.3088	-8.1061	-33.4812
11.3128	141.368	101.2	107.125	4.85302	0.369966	-12.4878	-35.0285	-55.1082
18.825	141.99	74.0295	102.423	4.85307	0.328865	12.0991	2.19124	-91.1807
11.0992	157.294	63.362	109.146	4.86053	0.38239	14.2139	-42.875	-28.9788
12.6814	137.404	70.6549	82.635	4.87221	0.383298	-1.83552	2.43844	-50.118
17.1501	157.629	88.6692	62.9489	4.87004	0.36807	3.7511	-36.712	-45.3215
14.5778	116.454	74.1988	139.461	4.86208	0.386547	17.6245	52.8633	-16.7096
9.21168	136.703	91.3899	90.3729	4.86162	0.373348	56.3881	-1.16662	74.4609
22.2608	144.473	89.9804	125.743	4.85328	0.377342	18.6446	33.7334	-14.0303
11.8358	148.497	74.7635	68.2231	4.86002	0.365737	-8.71242	25.07	-63.9893
20.3721	137.321	62.6436	122.446	4.85941	0.354347	17.4264	3.91153	-25.344
10.8799	139.08	99.0188	144.364	4.86091	0.406698	33.5473	-47.1884	-106.892
14.4496	184.417	80.3078	127.549	4.86556	0.375857	-40.1137	-0.1696	-64.6841
8.07907	153.023	107.908	136.548	4.85268	0.379714	39.9525	-23.2344	-49.0874
16.804	132.205	73.4971	110.8	4.86079	0.368241	89.5976	2.75179	-20.6283
22.1552	123.38	80.6485	104.729	4.86367	0.382148	15.2355	-26.8225	-85.6643
5.20892	163.431	84.5882	92.5584	4.86757	0.387157	24.2117	25.5191	136.292
12.2193	145.277	82.2672	130.485	4.86493	0.374162	4.23428	-0.922691	-12.4702
18.6719	163.62	75.5677	106.795	4.85885	0.382374	44.6092	-0.51791	68.4455
8.85784	132.236	82.1264	108.876	4.86239	0.381509	26.3208	5.97216	1.70304
12.442	155.794	70.3467	120.367	4.85583	0.356284	-15.3603	17.45	-68.8877
25.0907	166.935	62.2815	81.061	4.86055	0.378989	62.0901	-6.26062	-14.705
5.62491	163.027	85.7789	140.413	4.85632	0.412545	-57.4727	-49.2379	-79.2522
12.7372	136.657	87.7853	82.6657	4.86397	0.388111	-4.34089	5.3736	-76.7358
13.3203	125.303	84.0502	137.722	4.86311	0.359435	10.4902	-36.5332	-37.2769
16.787	127.999	74.1371	90.0651	4.86538	0.361239	-16.245	-8.91667	49.5913
10.9354	139.35	90.3594	102.545	4.86601	0.394868	16.703	-17.1848	-35.4051
10.1996	142.91	51.9892	90.1335	4.85741	0.355295	96.225	28.6387	21.1148
12.4501	124.772	80.1171	159.974	4.86058	0.376677	52.2853	-16.8609	50.3395
18.6266	151.41	87.1202	88.0577	4.86719	0.389635	-40.7707	-56.854	11.5072
21.7496	151.028	72.4653	124.432	4.86399	0.343453	64.5005	0.589869	-14.1436
13.0269	147.021	99.8768	125.806	4.85534	0.368419	19.7506	-21.4472	-87.2534
16.9011	140.535	76.5165	94.0681	4.86366	0.334013	15.0306	29.552	-99.6369
14.7784	160.937	70.6704	71.0749	4.86387	0.357597	11.7627	-9.62215	-39.9782
16.9704	121.689	59.0419	130.835	4.86803	0.355698	13.841	-7.15266	-39.54
12.1235	151.898	88.0434	79.2038	4.86662	0.362776	-2.37215	-9.30459	-40.1168
16.8082	123.458	78.6722	119.833	4.86257	0.373773	13.5508	26.887	22.1275
16.4173	145.037	91.5616	97.2977	4.85936	0.369186	44.5063	12.0604	53.6931
18.1976	154.899	70.4384	107.62	4.85277	0.361585	43.405	27.2638	36.2083
9.32739	153.907	71.5395	87.2006	4.85785	0.375467	-15.0825	13.3937	-69.0913
15.4268	142.54	77.9321	130.36	4.85913	0.346004	20.2686	-30.6747	-86.8145
19.895	134.436	109.407	116.688	4.86439	0.405686	25.9177	-52.042	-38.528
13.5693	172.236	63.2767	102.352	4.86392	0.355944	-31.7665	-6.0023	-5.73469
14.9006	131.032	104.395	144.549	4.85913	0.368755	13.3254	-2.9766	-25.0549
14.2702	133.243	66.2944	106.49	4.86609	0.364225	73.9729	-43.4916	-17.2196
18.9203	123.702	83.852	101.771	4.86408	0.386338	17.9644	-15.1127	-86.3241
8.55851	143.245	70.8359	164.262	4.86152	0.346508	28.8313	35.8043	101.587
6.18414	138.735	88.2616	164.534	4.86224	0.378907	15.3069	28.6551	-18.8972
20.75	160.4	80.5771	104.153	4.85885	0.381603	52.5913	18.9955	63.1133
9.69394	127.229	79.2951	115.154	4.85671	0.346412	2.41314	-34.1003	13.0153
9.78245	134.81	70.704	161.005	4.85465	0.37205	6.38559	-10.8119	-42.9399
17.5676	142.383	77.3592	83.3122	4.86398	0.385776	36.7312	-8.66743	-23.231
15.9912	178.329	70.5363	129.93	4.85701	0.4101	37.3035	-36.1587	-36.3463
12.0253	153.064	91.0404	65.1214	4.86248	0.429984	28.1415	16.3785	-32.1811
12.9886	128.176	90.1913	164.128	4.85623	0.367856	5.10749	-49.9952	-28.2261
16.4293	140.864	66.8071	107.998	4.85639	0.352477	-29.8671	17.9778	99.3044
4.63583	125.535	100.378	77.0132	4.8693	0.413104	28.6148	-10.4326	-38.0255
9.24375	136.24	71.0392	121.37	4.85878	0.348442	42.1773	11.2826	1.08184
7.93557	126.206	65.883	142.225	4.86262	0.360547	51.3272	7.91652	24.7654
12.5109	164.092	77.406	63.82	4.85632	0.384522	36.0172	-13.9893	-4.96843
12.5777	146.363	83.7948	149.473	4.86402	0.349545	58.9005	14.3918	5.46446
14.3089	140.076	95.7382	134.88	4.85721	0.366914	15.3779	-12.4497	-76.0742
13.9881	141.942	81.7979	117.43	4.86292	0.350638	14.9394	25.9089	-71.6486
16.3264	155.023	78.9645	56.9481	4.86323	0.367765	28.4213	-7.90166	-86.6302
10.8286	127.39	81.6775	129.267	4.85919	0.361339	-7.55575	-26.0946	-82.0491
14.522	135.777	82.1621	81.4832	4.86812	0.368095	11.9847	-8.4669	-55.6158
18.6597	119.968	77.4327	127.905	4.86167	0.378094	6.68987	6.66827	-30.974
13.5783	131.187	98.1934	125.595	4.85155	0.366573	37.832	7.2217	2.76956
17.7104	151.86	68.9679	104.864	4.85352	0.361007	27.2114	36.0963	13.6909
9.11651	160.631	65.5331	71.1806	4.85789	0.386805	-31.0297	3.7227	-69.3127
15.0505	124.612	80.3803	129.65	4.85882	0.339333	52.614	-16.5176	-56.9707
16.4652	153.079	125.396	120.07	4.86283	0.4167	23.3937	-92.6957	-10.7767
13.7653	159	71.4705	89.0987	4.86402	0.360459	-15.8749	-2.53595	-2.00758
17.8702	113.719	111.488	124.608	4.8575	0.37045	-26.3814	1.55562	-22.8312
14.2596	136.65	69.5195	117.626	4.86169	0.365529	29.8895	-26.0577	29.0631
20.7512	129.57	74.5553	79.9837	4.86784	0.393479	50.2084	0.04574	-70.0607
15.845	152.937	74.0379	127.056	4.84676	0.399392	9.71599	12.2647	41.3999
10.0472	135.229	101.231	156.817	4.86181	0.377576	26.5541	1.55672	-24.3313
19.3004	153.7	75.4265	100.057	4.85639	0.366506	44.1076	14.8258	62.2035
8.04773	124.878	81.1751	103.581	4.85935	0.340156	-18.5838	-25.5869	-0.403721
8.57306	136.556	66.2832	174.333	4.85305	0.366549	11.2204	-12.6054	-34.2301
10.2755	151.313	69.591	95.8678	4.8675	0.380346	41.6173	-20.3015	-28.2291
13.3446	148.99	68.2807	132.202	4.85548	0.370418	31.4314	-25.8136	-39.8138
13.4052	156.24	87.9541	65.0677	4.86333	0.40759	3.53995	10.0018	-49.944
14.0023	138.478	86.6957	167.144	4.85614	0.385665	-9.09441	-51.1495	-42.8331
12.3812	131.946	57.5241	112.935	4.85931	0.34913	-12.3742	-13.6251	14.8732
4.08966	137.5	93.1286	87.9484	4.86402	0.397263	10.8497	-15.2374	-32.5549
13.1092	125.115	82.3282	88.9009	4.8569	0.382357	60.5152	10.5108	-51.7212
8.50656	119.3	69.7987	142.827	4.86268	0.379239	48.6973	-26.0594	3.53748
20.2636	155.727	93.177	60.9882	4.86068	0.364679	19.7782	-3.73598	-57.7771
11.8355	136.124	90.5765	177.937	4.86186	0.356382	31.3676	-13.5944	-17.2707
18.6136	124.998	96.0678	133.374	4.86134	0.364083	18.0101	7.71415	-77.5943
4.63387	130.45	88.0768	119.954	4.86195	0.357664	-75.8666	33.5523	-111.866
13.6114	160.568	79.6195	138.892	4.85857	0.363498	40.3026	-31.244	-46.1967
12.0359	128.316	78.7659	123.276	4.8585	0.35884	-3.86292	-18.6212	-55.5672
18.2569	130.857	72.7776	74.4381	4.87715	0.35813	63.6189	6.8986	-43.1227
16.2571	127.506	80.5963	133.971	4.86626	0.355264	34.1691	24.0314	-33.7624
21.5175	149.259	100.64	100.046	4.85301	0.374497	35.3495	56.4054	43.0036
16.8347	140.505	81.0274	82.0119	4.8625	0.364186	14.3102	32.8283	7.84601
12.8532	148.233	67.0859	83.3101	4.85954	0.37165	-19.5844	7.14897	-30.7663
14.2002	124.996	74.002	130.642	4.86008	0.334449	50.8708	-22.1332	-64.3728
15.1076	150.349	123.302	114.46	4.85925	0.380961	23.5933	-29.3895	30.1286
11.1093	150.23	72.786	99.883	4.86517	0.366003	-34.2222	-25.798	-79.3145
14.1084	129.131	104.282	136.813	4.85592	0.378156	-23.0852	6.73334	15.7387
14.2978	131.169	71.8212	135.171	4.85735	0.368542	8.08944	-17.8776	42.8809
21.6277	124.81	74.1941	67.6833	4.8698	0.413836	50.631	17.6923	-85.1463
16.0156	174.63	93.1973	137.992	4.85058	0.413301	35.6364	17.5958	46.2268
11.2275	143.221	100.248	151.974	4.86303	0.377559	21.3032	5.52466	11.3662
16.7022	149.062	53.9065	108.613	4.86683	0.340888	10.1156	-4.17494	67.0054
9.80709	133.878	83.8275	148.973	4.86031	0.35522	21.4685	-36.3994	-16.3202
9.08913	134.627	65.1768	152.842	4.85561	0.362336	7.58194	-8.07471	-36.7701
11.8471	161.548	73.332	81.527	4.8643	0.371574	27.9872	-22.8483	-27.7943
13.4742	156.004	60.8566	160.5	4.85594	0.357623	39.449	-56.5558	-53.3298
10.3501	135.796	96.0085	96.6975	4.86222	0.416516	15.3689	8.35167	-24.4479
18.366	137.365	106.576	169.131	4.85132	0.363595	-37.4622	-14.821	-56.9558
17.5685	139.628	50.5436	105.07	4.86005	0.345114	9.23864	-6.59278	-12.6386
9.13176	123.942	121.817	108.05	4.85686	0.393734	31.6322	-10.9096	-6.16112
19.6439	122.467	63.8402	74.7401	4.85479	0.373257	63.5813	12.5915	-52.2393
12.4612	117.094	69.8783	90.9487	4.86446	0.395913	1.51573	-17.8594	-34.2801
19.3535	168.136	91.1601	49.8036	4.86129	0.365224	-17.0641	5.2156	-19.5891
12.5791	150.497	111.685	193.913	4.86559	0.398278	36.5404	6.49465	-23.9699
22.4578	118.877	124.542	127.929	4.85791	0.360493	20.1093	18.4675	-66.8165
10.4244	129.01	61.8554	96.443	4.86252	0.35033	-1.49182	5.31285	-44.0202
13.7268	157.766	97.5454	144.655	4.85759	0.362788	63.5775	-40.1274	-28.6326
14.4628	125.33	67.3688	89.7229	4.86276	0.364259	12.7348	18.5821	-4.44582
16.5231	153.375	74.7849	73.4783	4.86381	0.382539	45.8406	-3.36289	-10.1426
17.2156	124.985	81.1876	141.773	4.86709	0.352299	41.5419	34.1672	-34.305
18.6696	150.021	90.3053	89.8684	4.85944	0.368813	48.9727	37.6454	18.6302
12.2803	152.212	77.4769	84.5668	4.85993	0.347933	-19.5435	11.5637	25.9821
16.1748	159.659	70.069	81.2088	4.85784	0.389171	0.432617	6.82029	-41.1949
13.2777	123.105	78.4237	136.259	4.86215	0.32501	34.5353	-37.9427	-68.7815
17.1866	147.897	141.693	96.2492	4.87011	0.397149	67.0577	-34.6214	-43.8233
12.8031	146.727	76.0261	94.0319	4.86683	0.364976	-29.0318	-4.43373	-76.1176
16.5697	131.859	109.02	132.098	4.85453	0.388896	-34.6149	21.2256	22.5455
16.8949	135.926	77.5588	143.461	4.85761	0.380069	16.2042	-29.1149	31.1322
18.8464	146.747	75.4724	74.7315	4.87134	0.416858	32.1567	11.5284	-64.6685
18.1498	148.42	89.2949	146.309	4.84833	0.399991	12.5696	30.4618	26.7513
10.6817	183.199	96.0623	152.189	4.8608	0.379003	30.9803	29.8428	50.4762
16.5638	138.805	77.6526	114.68	4.86892	0.387636	33.9775	14.3004	59.359
9.94114	145.369	82.4505	158.36	4.85727	0.376525	27.1481	-30.9102	-20.7733
8.52108	130.106	69.363	118.575	4.86299	0.367015	-8.82205	19.0648	-36.9218
13.1151	188.357	74.9354	96.5341	4.85648	0.35428	52.7098	-20.0549	33.5816
14.5881	159.033	79.4053	102.384	4.85545	0.374582	32.3582	0.507693	-68.4658
9.00319	150.896	73.3313	70.1946	4.86963	0.44456	10.677	14.9756	-40.855
18.6346	132.465	83.6401	104.826	4.86269	0.369049	-59.3555	26.9854	-71.5024
13.9408	152.911	66.9553	98.3285	4.86382	0.396759	12.9397	0.897106	-48.2935
12.4208	137.786	110.646	109.586	4.85782	0.383223	18.9265	6.63837	-1.14637
17.3257	123.508	77.6526	78.765	4.86039	0.368868	70.3036	5.96997	-95.3058
12.274	133.288	70.5456	100.84	4.86544	0.395884	13.2716	-26.0214	-44.2841
14.1298	159.471	88.9786	62.9524	4.85998	0.371192	-12.8101	8.82202	-8.45866
14.5489	164.249	102.888	133.881	4.86171	0.383539	21.1508	17.3278	-10.7778
20.0903	128.917	111.731	119.262	4.85929	0.366498	25.8582	20.051	-36.4048
5.55918	127.416	50.4609	91.3668	4.85595	0.308544	13.082	15.6423	-18.9717
11.4124	161.576	94.5209	167.269	4.85975	0.378323	37.4389	-43.1503	-24.0876
11.4046	119.916	53.6325	77.91	4.86637	0.368101	-0.900195	10.7317	17.7057
12.5886	154.12	74.7797	101.183	4.86394	0.38638	55.2556	-31.9576	4.12393
17.9575	127.329	81.0082	138.484	4.86602	0.352407	52.8102	22.2465	-52.8554
15.6699	181.838	78.5226	132.224	4.86133	0.366378	56.021	45.7046	14.525
15.0478	154.35	74.4395	70.3627	4.86285	0.375209	7.94808	4.42697	28.562
16.6054	185.733	82.6236	134.89	4.85735	0.373363	4.71732	45.5607	0.845076
15.7005	121.269	101.59	143.952	4.85989	0.339465	42.4764	-39.8905	-12.4264
19.3331	127.27	128.226	111.188	4.86572	0.394398	36.8951	-46.76	-36.1006
17.8467	169.557	85.9696	79.766	4.86507	0.385609	-44.6339	5.69079	-40.783
13.689	128.219	96.6653	103.677	4.85833	0.386429	-29.6444	18.834	8.4856
13.6709	127.4	75.2735	135.873	4.85791	0.378642	24.3819	-20.5128	32.1678
15.3211	150.929	88.9414	116.353	4.86053	0.399301	-12.3688	-34.8218	-104.112
15.1238	137.493	83.5139	140.997	4.84634	0.404148	-25.6253	16.494	-31.354
9.28479	195.008	98.7049	189.599	4.85502	0.375764	58.8401	33.0434	53.29
14.9206	159.762	77.6037	130.377	4.86822	0.394831	62.973	20.7452	76.2098
11.2171	134.442	79.8851	150.096	4.85728	0.378728	12.4282	-25.0822	-37.0766
8.78188	117.484	63.4027	111.779	4.86156	0.366415	-20.388	21.3383	-55.0456
9.21544	159.233	66.5198	101.176	4.85925	0.365389	34.7358	-4.9473	5.18968
14.4847	150.169	71.2255	81.592	4.85606	0.368444	2.36797	-21.0522	-111.464
11.3873	140.762	76.1067	79.7843	4.87108	0.40766	27.469	-2.91812	-6.2701
15.8273	142.195	79.7597	128.025	4.85896	0.377944	-43.7859	40.5791	-71.6713
17.0751	134.242	73.8132	83.6938	4.87143	0.407311	2.44144	6.58946	-42.0158
8.59942	132.702	152.587	110.832	4.85824	0.35223	58.923	-31.915	-15.7913
19.7218	130.082	70.939	75.8682	4.86104	0.367678	110.489	5.77544	-108.243
12.3091	124.641	71.3748	101.51	4.86343	0.400985	8.17879	-23.7521	-30.8333
14.0543	148.78	88.4643	102.092	4.85799	0.367291	-9.41915	6.22519	-38.6022
15.4527	162.119	85.164	149.624	4.86487	0.385376	21.7723	-10.5702	-77.786
21.0652	131.244	105.892	109.658	4.8691	0.374291	65.0885	31.1552	21.0579
9.58249	135.044	72.1727	126.709	4.85665	0.344647	16.714	-10.8541	-0.241575
10.4601	149.844	93.7767	159.483	4.85992	0.371232	16.0931	-53.0623	-65.2673
16.3478	169.299	68.9025	85.5879	4.85758	0.357825	40.899	22.1079	57.4722
12.8766	175.331	73.5578	106.84	4.86349	0.381304	90.7063	-24.5565	20.053
16.6196	145.527	76.3384	91.6957	4.86567	0.384402	39.5988	45.2993	-47.1599
13.3458	155.463	92.0537	135.676	4.86057	0.394126	44.9521	28.1504	-12.7134
18.407	132.612	103.968	72.0184	4.86443	0.363568	3.36523	-26.3929	21.3743
16.7246	164.213	76.6286	135.599	4.85966	0.375409	31.0045	19.0995	-25.0109
17.8758	127.095	86.1571	144.921	4.86388	0.349276	61.4968	-19.7834	-32.7305
13.7876	142.888	108.039	116.774	4.86301	0.391935	58.9534	-17.8854	-43.2378
14.0091	180.224	80.5035	97.7612	4.85809	0.362212	-41.2109	-0.0342232	1.94255
7.04432	131.66	82.2329	97.7701	4.86016	0.377967	-8.65385	31.9675	-13.4838
13.3413	116.054	75.8019	125.936	4.8546	0.394132	15.7719	-27.8379	3.90927
18.3209	142.489	92.4566	107.639	4.85932	0.412372	-29.1939	-38.3218	-129.776
14.9382	143.887	90.2912	140.354	4.85115	0.389545	2.83995	5.15477	-31.3781
11.3027	144.197	85.3897	122.504	4.85916	0.391902	74.3947	-7.06126	30.62
12.2052	158.997	73.1996	143.824	4.86299	0.412291	19.4882	7.57036	41.4934
15.2645	133.089	64.0556	180.503	4.85348	0.354695	-14.8513	-34.0446	1.96751
6.94413	109.323	83.784	95.2192	4.86275	0.361133	-2.80324	7.94233	-64.6921
6.90867	164.524	72.1004	55.9633	4.8622	0.379245	59.6486	6.0595	-8.85985
17.6925	146.569	78.6232	88.0897	4.86319	0.3399	61.4647	-4.76446	-5.93849
8.97151	137.652	73.946	77.1179	4.86758	0.395023	0.599287	-1.7216	7.75001
15.8268	143.753	78.8199	133.096	4.85854	0.374859	-29.2586	31.5039	-61.1598
17.288	152.178	68.8647	74.6249	4.86327	0.414978	4.21883	24.591	-70.5234
11.7658	140.812	121.855	128.782	4.85612	0.374537	26.5687	-13.9088	-44.5269
14.07	132.204	85.6362	98.1303	4.86112	0.383242	59.5201	-11.0485	-61.265
12.9503	142.158	99.5292	115.787	4.85796	0.388766	43.2925	-32.6272	-16.7638
16.9121	175.509	111.731	112.79	4.86092	0.408745	37.3664	7.94275	3.65913
9.71974	156.049	106.834	119.516	4.86151	0.369309	55.8818	-30.1178	-15.6366
15.6766	150.914	105.549	111.384	4.86333	0.366343	41.2156	-22.6722	-1.76936
14.548	136.779	84.3318	124.817	4.85719	0.377257	-14.9336	-18.1028	-52.2333
16.6507	186.407	99.4315	201.095	4.85963	0.396441	26.3329	-63.6126	-77.4694
23.1301	153.262	111.254	127.786	4.85562	0.358255	77.1357	-9.87648	20.0891
14.1499	165.293	75.0287	115.296	4.85956	0.370173	38.7647	-23.6635	0.808552
18.0074	146.594	86.2553	94.5947	4.86557	0.383908	38.9191	39.7457	-30.5904
9.04211	135.968	83.3211	141.151	4.85989	0.391427	63.5267	7.31752	-21.6375
20.4685	138.239	133.804	105.156	4.86307	0.393522	-58.8588	-47.4866	-14.6618
13.8685	157.302	66.4157	133.986	4.85955	0.380205	-6.41895	36.3774	-43.8137
13.1276	128.47	94.1126	98.0691	4.86418	0.341561	23.3746	-48.0011	-20.3831
12.0594	145.641	88.3807	83.3893	4.8678	0.39617	17.1062	14.0583	-26.2374
13.4733	154.573	74.8146	132.522	4.85646	0.357957	-19.1044	-4.1191	-15.2606
6.25478	118.876	71.4724	119.152	4.85492	0.339929	-13.4672	54.3077	7.39848
12.0206	124.367	72.3247	140.788	4.85301	0.389873	-26.4435	6.97693	-27.2004
15.6249	145.151	87.7927	103.364	4.86001	0.394794	-9.04885	-21.0889	-106.05
20.7181	153.195	94.7669	132.832	4.84845	0.372635	-21.1245	19.7256	-17.2038
11.5594	136.09	89.0803	137.082	4.85802	0.388415	52.8129	1.49777	26.3116
17.5916	160.005	95.5475	128.684	4.85845	0.388888	-22.9902	-10.3203	-10.2526
17.0984	137.304	65.071	168.251	4.85631	0.340134	2.91706	-30.1949	5.7822
11.9677	113.207	83.3135	87.0748	4.86336	0.360554	20.0994	-11.0649	-54.5888
8.62456	164.759	73.8559	58.9992	4.86666	0.37814	43.731	27.4989	-22.2446
15.8564	116.506	65.9857	107.567	4.86075	0.35767	20.5064	-5.04715	-45.6193
9.45134	145.348	69.2576	73.3965	4.86686	0.410568	-2.15981	9.9058	-4.29902
15.2428	115.528	81.6027	159.828	4.86169	0.357805	-15.6739	20.0987	-58.329
16.5966	141.666	60.135	84.5475	4.86307	0.393587	19.4017	15.626	-69.7602
13.027	139.639	107.258	125.017	4.85712	0.352314	33.5953	-33.891	-39.6723
17.1547	118.393	86.9713	100.983	4.86268	0.390838	28.5467	-18.2782	-86.3733
19.8781	150.139	86.5257	73.6686	4.86491	0.37388	13.1912	0.397024	-58.0088
16.7944	166.167	95.5143	130.135	4.85779	0.37673	16.2214	5.20178	-15.7192
9.1861	171.675	106.582	135.332	4.85945	0.368182	66.6907	-24.6108	-10.919
14.9196	128.891	83.9793	135.057	4.86069	0.330558	17.1755	-47.4298	-7.12772
19.2458	156.184	83.6493	106.441	4.85477	0.376152	25.7198	-42.851	31.9744
17.3102	166.229	86.7587	154.824	4.8599	0.401411	25.1614	-5.48166	-52.1795
18.4685	145.268	102.31	106.81	4.85997	0.350697	72.5096	-9.54404	18.907
12.6265	184.356	69.9529	94.7272	4.85954	0.397567	79.7037	-18.2339	39.4766
21.4182	141.706	73.6811	113.662	4.86312	0.377701	42.7586	57.1304	-13.9701
7.21051	140.969	83.4176	159.588	4.85983	0.394217	99.0717	11.897	-3.16498
19.139	146.518	104.629	129.524	4.85855	0.379086	8.97695	-12.5346	2.62962
12.1731	174.482	84.6016	151.044	4.85541	0.378966	-12.8631	31.1363	-46.5013
12.4156	122.274	62.6356	56.5281	4.86747	0.347734	44.1523	-21.2705	-75.6239
10.1411	143.75	119.312	116.214	4.87072	0.391715	14.1516	7.89192	-49.5684
6.24253	149.01	61.9646	100.846	4.86159	0.363752	-51.2986	-7.16131	-8.86615
12.8246	137.254	75.3929	111.98	4.85823	0.354244	-8.86957	75.0015	12.8327
12.1286	124.788	70.3411	140.713	4.85186	0.374325	-21.4633	32.6379	-17.5987
16.8016	146.563	83.8004	106.559	4.86062	0.388701	23.6135	-2.77211	-59.9904
14.7506	130.521	72.5457	102.222	4.84992	0.40269	37.2591	3.59769	-2.97295
18.2187	128.948	111.416	176.068	4.85579	0.3607	49.6921	-7.68698	5.94938
21.909	165.351	90.1739	160.696	4.85623	0.408722	-77.8877	-24.9278	-12.0508
18.8576	133.218	74.195	146.54	4.85691	0.364765	3.59973	-44.5161	-35.7819
6.47435	104.776	80.9849	69.6484	4.86049	0.374521	32.8807	19.3506	-6.18602
6.57348	156.062	84.5766	91.9846	4.85943	0.386104	31.0224	54.9521	23.1614
21.0704	123.859	75.7779	67.4322	4.86971	0.375568	36.725	-18.3121	-113.802
6.12826	118.704	64.9535	55.0146	4.87521	0.414368	9.445	21.0267	-35.4655
17.0858	131.646	85.8827	175.802	4.85689	0.36106	-26.0594	-4.91416	-79.354
15.1478	155.452	57.1255	59.0427	4.8622	0.396857	27.7872	16.3048	-50.7063
14.1859	162.073	103.688	100.11	4.85796	0.382903	34.0058	-27.0923	-48.7084
15.6469	155.214	86.2584	126.353	4.85615	0.402279	84.5296	-39.7404	-14.9745
20.8399	144.8	91.8809	93.6078	4.86114	0.363076	-19.0938	15.3951	-39.3141
15.008	198.992	118.451	158.717	4.85436	0.339694	15.4555	31.1393	9.48466
7.18341	152.656	71.6965	143.169	4.86446	0.356804	68.3362	-17.4936	-11.932
16.7843	134.671	57.5432	116.414	4.86277	0.327594	23.5881	-26.9544	-16.023
13.3572	144.287	75.1968	117.146	4.85414	0.396156	51.8836	-11.1985	38.3743
21.659	163.392	77.2576	149.055	4.85624	0.374551	6.96585	-44.3799	-94.7554
19.0164	159.243	113.448	118.192	4.8599	0.358099	59.5574	-29.2791	-27.8048
18.9615	178.482	75.8525	159.857	4.8581	0.412604	40.5732	-40.9675	33.7176
18.4531	139.52	68.7107	114.293	4.86326	0.370261	39.4124	42.1564	-10.143
11.1897	142.091	78.6161	141.626	4.8619	0.383771	97.7508	12.0781	1.08134
23.341	160.425	124.914	129.879	4.86121	0.372083	31.769	-23.4926	20.6531
11.5738	175.436	72.7343	125.883	4.85887	0.356483	-15.2694	48.1298	-85.0233
15.2358	144.537	81.7415	107.141	4.8609	0.358322	12.0035	-5.9444	-42.5078
2.993	135.429	143.409	191.433	4.86315	0.364601	-40.7499	-28.2716	-69.1595
14.1316	139.878	59.2746	121.003	4.85491	0.350633	-41.5442	-12.2817	-9.53815
15.2523	129.137	78.4794	118.183	4.85945	0.34939	2.51976	32.213	8.51878
15.3938	139.81	87.541	144.137	4.85334	0.389665	16.0517	-10.1165	-9.69626
14.9985	141.154	101.267	111.633	4.8632	0.400343	65.869	-7.17203	-59.7967
16.7012	130.985	75.5921	96.5262	4.85286	0.405816	36.671	-1.39912	-27.7392
15.7134	133.968	102.283	145.679	4.85596	0.370025	86.972	-3.26513	6.13461
15.6227	154.379	86.894	130.549	4.85933	0.391979	-18.9339	-4.93316	-9.78479
18.895	136.085	79.6748	142.931	4.85735	0.36056	6.09771	-45.2596	-35.095
14.2362	145.255	89.3597	80.2177	4.86271	0.404789	-39.2041	-17.0458	-62.0357
6.90273	153.755	85.5094	84.8046	4.86373	0.388523	31.3069	44.9981	5.45663
17.7374	129.004	73.0851	114.491	4.86388	0.375788	13.261	-15.1228	-99.8981
7.16806	145.157	78.703	66.2183	4.87424	0.386042	15.2024	3.06296	-70.1403
14.4271	134.349	83.9471	154.948	4.85363	0.372907	3.49547	-7.53202	12.0988
15.9992	153.393	57.3013	45.8529	4.86268	0.406446	41.1722	15.1741	-49.6869
11.123	186.941	102.592	132.278	4.85451	0.359002	-6.63812	-40.2836	-12.3519
13.3045	150.753	77.0463	115.639	4.85891	0.383646	68.4663	-26.1812	-17.5753
14.8905	127.68	64.1985	75.7513	4.86459	0.356126	-14.8047	18.8344	-40.5613
14.1502	153.53	85.7502	138.573	4.85758	0.359394	5.82511	22.4311	-11.0325
6.83404	152.568	71.9018	145.56	4.86417	0.35723	29.6749	26.4895	-93.5925
7.81898	149.078	64.5811	126.359	4.8646	0.326341	16.9958	3.38424	-15.922
12.6968	144.287	83.2386	116.824	4.85185	0.398776	44.685	-16.7114	38.7556
22.3733	161.731	72.8756	149.488	4.85617	0.371507	4.88258	-47.4572	-102.85
13.7518	154.083	96.1667	109.005	4.85958	0.364801	43.3573	-22.5679	-4.50546
23.3648	181.931	84.6452	127.351	4.86217	0.392244	41.9987	-49.8355	-48.3806
14.1587	147.408	63.258	106.118	4.86813	0.384151	25.0658	20.3486	-8.47105
13.5828	153.591	71.3464	153.251	4.86498	0.377305	110.845	-3.53009	-10.5669
16.3035	157.801	91.0442	123.131	4.86505	0.367766	13.9051	23.0085	-57.6092
13.4357	181.093	72.6729	129.391	4.86544	0.370187	23.8856	62.5486	-99.079
16.4281	148.031	58.8755	109.403	4.8575	0.323746	2.01598	-16.7061	-27.5502
9.12228	155.378	106.026	143.559	4.86268	0.372045	27.7124	-7.27091	-26.5623
13.4854	129.54	80.0632	76.3742	4.85847	0.390235	-0.714467	-2.51306	-5.76256
13.4803	132.917	79.3679	104.287	4.85822	0.364031	-13.8597	25.2235	6.27165
13.8707	142.453	77.5431	115.197	4.85747	0.38568	39.8185	-2.83438	-6.2983
16.0354	155.774	99.3513	100.179	4.86699	0.397284	27.2637	5.05557	-95.738
14.469	123.06	77.9589	79.7296	4.85175	0.380407	65.2334	16.1687	-17.0519
12.4964	116.446	85.1802	132.124	4.85975	0.361662	56.083	27.6147	0.946615
15.2161	147.952	77.7433	122.922	4.8579	0.398226	-12.322	-7.68456	-17.5573
15.9822	134.137	75.4926	113.871	4.86785	0.349168	24.9062	-43.9734	22.3589
15.5136	144.755	86.5238	83.0768	4.86185	0.403644	-29.1551	-17.8058	-56.2247
5.41916	150.453	99.6355	91.4199	4.86025	0.387324	17.3836	12.8473	34.8274
20.3174	136.85	107.858	132.262	4.85989	0.382954	13.7404	-54.2636	-93.8594
7.44932	143.502	72.5033	62.1867	4.87195	0.38859	21.056	17.9996	-44.7521
11.1111	130.85	70.5854	156.456	4.85659	0.337239	-7.14942	3.3207	-0.753539
13.5718	155.082	67.5236	80.6154	4.86103	0.389599	30.9887	12.5025	-48.7552
12.8562	151.083	82.8349	93.6019	4.85817	0.366663	27.3798	-3.48593	-21.4384
12.9026	145.766	84.6907	123.885	4.86019	0.359445	100.587	-38.0002	6.77709
17.2068	116.829	61.8551	47.4142	4.86482	0.363819	-23.5636	17.2848	-33.4734
11.6672	145.09	92.7822	123.107	4.86102	0.365524	27.8439	30.1799	11.5053
7.15818	151.941	81.6282	174.076	4.86009	0.359927	28.5715	10.2984	-66.4691
8.92204	137.157	58.0261	116.239	4.86537	0.329583	28.941	-4.29389	-76.0959
12.6783	128.161	69.479	83.2526	4.85692	0.390132	57.5719	5.02952	-4.29464
19.8419	131.829	77.792	127.634	4.86274	0.385758	32.093	-10.6896	-100.03
13.5195	133.698	90.5322	97.8551	4.8598	0.377665	76.1319	-23.7265	6.34883
11.702	159.365	63.2643	99.7483	4.86324	0.367844	39.6517	21.094	-58.4474
16.3018	143.444	70.7752	111.789	4.86557	0.380537	18.7856	-2.03918	-3.6374
14.3075	155.624	58.1831	94.9936	4.86792	0.381379	71.4085	-12.5594	-98.0391
15.9607	181.551	89.6713	127.728	4.8671	0.341609	11.5203	17.2666	-66.5434
19.1373	178.314	85.2016	107.982	4.86074	0.381308	-18.6853	-14.1479	-23.9424
15.6029	152.609	63.5801	91.0709	4.85894	0.354036	12.3622	-4.50943	-31.784
7.90907	155.528	109.362	143.41	4.86469	0.362782	39.0981	-3.85115	-5.11287
15.4591	120.283	72.4902	74.5097	4.85413	0.387925	-0.65237	-6.44012	47.3906
18.1074	138.373	82.0562	137.282	4.85888	0.351945	-4.58252	13.7025	-15.5635
16.1644	140.7	75.7967	106.102	4.85639	0.427855	77.604	-14.8516	8.72889
19.4248	125.11	113.636	116.026	4.85929	0.370706	-12.1862	43.0611	-30.4761
18.1172	113.539	79.9658	62.4286	4.85291	0.399478	27.2008	2.57286	-35.0438
15.0324	127.934	69.8465	109.348	4.86193	0.358991	52.7667	15.1192	-6.19292
15.6238	154.896	72.6754	148.031	4.85965	0.374669	-68.6784	9.05794	-7.94385
15.0578	131.489	81.2934	90.8897	4.86027	0.35252	37.0412	-36.5063	24.6533
15.8174	152.561	89.1008	99.5366	4.8629	0.39306	-16.4392	-19.7997	-52.0589
4.90083	159.881	111.132	126.74	4.85927	0.376952	30.7496	-10.9135	-7.21143
16.8624	149.78	103.835	119.3	4.85722	0.356146	22.5529	-42.6912	-66.7581
8.93175	132.017	74.8675	68.5641	4.86858	0.376992	22.104	5.8263	-33.1937
13.0767	124.509	67.7283	119.921	4.85292	0.357577	-11.1449	8.57572	14.0676
13.2714	168.239	60.463	55.4465	4.86578	0.382973	23.8213	30.4314	-98.267
12.202	146.578	78.9269	97.4423	4.85904	0.340415	21.7512	8.21854	-14.0507
9.54378	161.24	91.7554	150.473	4.85857	0.370201	82.9132	-15.232	-17.086
16.3239	127.213	56.0363	57.4089	4.86489	0.371898	0.614738	16.03	-40.573
12.7325	152.487	97.1123	97.6742	4.85915	0.383257	9.2512	26.6413	37.9135
12.6672	130.305	65.8429	129.346	4.86577	0.355288	-3.88619	9.53392	-49.3279
10.1013	136.765	68.387	113.125	4.86581	0.339064	29.1736	3.36677	-74.665
11.267	134.223	67.3734	88.4615	4.8601	0.393941	34.1388	30.5976	-10.9129
21.2944	125.898	77.1796	141.1	4.86021	0.380013	76.3068	-12.2575	-101.232
12.191	148.332	97.2258	98.1099	4.86103	0.392606	93.1088	-11.1275	-33.2607
12.9003	167.406	79.4255	116.075	4.8587	0.37976	33.1731	-6.89737	-44.2658
18.4776	143.126	64.8247	83.2799	4.86738	0.373969	51.6522	-12.2011	-2.33445
14.2074	148.924	77.3578	106.177	4.86535	0.384848	46.3351	-2.33341	-74.5448
15.2529	151.501	84.471	113.35	4.86009	0.357559	6.37424	16.7012	-19.7444
16.6673	182.19	89.983	118.744	4.85888	0.371818	12.2395	-24.593	-26.2645
14.8993	153.37	69.6102	100.796	4.85819	0.353907	16.5992	2.36415	-16.531
3.98468	136.497	101.706	107.11	4.86629	0.347126	-4.26859	23.5255	16.6493
14.7903	129.799	65.3886	108.518	4.85655	0.368555	-23.8885	11.2399	-1.27891
18.4433	134.434	74.2178	144.222	4.85993	0.350673	-12.591	16.9038	-34.6263
15.5794	170.311	78.053	125.46	4.85347	0.412878	27.4135	-43.0305	-50.6829
20.0139	130.327	95.6773	117.38	4.86212	0.367949	24.7202	27.7973	-80.0693
17.5759	125.157	67.0072	74.6969	4.85837	0.367231	18.6869	-2.74578	-46.2106
15.934	135.375	63.135	128.529	4.86941	0.371583	78.3359	20.4792	26.9068
17.0816	174.186	83.1712	142.344	4.86178	0.376074	-27.3713	-13.0567	-18.2165
13.1965	123.67	85.58	108.868	4.85549	0.355065	5.79703	-38.0263	-14.0995
14.9887	166.371	101.247	104.425	4.86495	0.411992	-18.0656	-35.0458	-63.6055
7.44509	138.825	96.9769	84.1686	4.86098	0.350104	15.4979	-3.80782	3.19643
19.6645	143.994	85.6446	108.728	4.85755	0.363954	16.5216	-42.4304	-66.2989
5.85278	128.995	74.5619	42.5798	4.87314	0.358837	-4.39206	27.4757	-24.2461
14.2838	127.423	67.7992	115.583	4.85395	0.366033	-5.69166	3.57937	12.993
11.8481	145.349	63.4055	78.032	4.86525	0.371144	2.38175	24.4378	-55.0944
16.014	135.147	82.441	78.2779	4.85606	0.357878	63.2784	-2.45701	-10.27
10.2157	169.683	88.1183	150.179	4.86296	0.378211	76.4534	2.87172	-27.2012
12.8376	128.76	62.2228	97.6321	4.86639	0.360543	53.8165	-17.8187	-76.0979
14.3416	141.484	78.9328	79.7982	4.86523	0.390515	9.72647	34.2651	-28.8559
5.38134	124.526	78.0553	125.883	4.86373	0.345289	48.9891	12.6035	-22.7766
12.5642	131.299	66.9119	107.4	4.86336	0.360326	12.4526	6.40492	-51.0651
19.5117	128.269	69.4786	83.7644	4.86048	0.422457	35.0527	24.1994	7.93404
27.6323	152.07	69.6332	172.717	4.85603	0.37368	33.218	-26.013	-153.84
10.8022	155.48	89.0999	127.606	4.86023	0.377284	88.3655	-19.889	-41.6464
14.0822	166.031	70.9995	95.1769	4.85803	0.389246	47.2191	-25.9547	-77.5029
18.406	130.558	62.0573	85.8439	4.8622	0.362459	1.7936	-5.85731	13.9366
11.0665	138.905	66.8913	88.7546	4.86704	0.384956	23.8666	24.9059	-85.3837
16.1237	181.966	72.1606	128.18	4.85498	0.351557	50.3473	-20.1458	-26.7511
17.4964	190.336	83.4983	141.711	4.85745	0.366768	5.49142	-31.5622	-36.3699
13.2599	147.001	67.4539	88.0937	4.85591	0.342659	6.698	11.7236	-37.4587
7.03857	143.878	111.256	108.376	4.86756	0.380548	-63.8925	112.693	6.93511
10.5468	120.114	79.8619	118.38	4.85328	0.361773	-18.3683	15.2166	15.7983
17.6437	156.468	84.4329	155.968	4.8562	0.359688	-50.8691	39.6017	-56.747
5.79242	143.884	84.0605	148.224	4.85989	0.389095	47.7349	-27.8152	-77.9107
19.9562	128.648	87.7161	127.709	4.8587	0.36473	2.06298	27.8051	-64.9962
18.4236	126.78	57.3197	87.6217	4.85743	0.370941	21.8219	0.652612	-127.808
14.7493	126.528	77.1887	129.703	4.86152	0.354783	39.4027	-19.7451	-6.32024
9.33423	142.365	104.999	141.899	4.86108	0.33055	1.95888	-19.1303	1.0158
13.2376	129.349	92.1666	111.021	4.86129	0.355812	10.9624	-34.6743	-37.5
13.4894	167.957	107.348	159.03	4.85842	0.357403	-23.914	4.57401	-18.6588
4.78774	141.983	95.7992	106.612	4.86274	0.354144	5.23533	-39.824	18.1243
19.5643	151.405	89.5615	130.761	4.8593	0.369037	34.6308	-51.835	-87.6921
16.4641	167.347	52.1407	57.0444	4.86901	0.363418	20.7857	21.1171	-42.9437
5.36797	145.19	81.5062	128.976	4.84513	0.382017	-23.144	15.0993	41.106
11.467	147.05	75.5571	117.452	4.86275	0.378745	23.961	2.65282	-66.3587
20.2778	143.244	75.7483	90.6704	4.85556	0.378078	74.3797	-14.8036	-45.8557
7.51491	151.748	84.4818	164.694	4.8544	0.386594	-31.7109	26.0646	25.6787
11.9943	126.198	62.6739	89.8181	4.86728	0.36281	49.1854	-10.2867	-67.4743
11.2664	137.405	85.8418	84.2704	4.86009	0.387735	11.9111	20.3074	-1.23144
7.24819	140.931	97.2882	122.757	4.86106	0.351829	24.3469	13.6161	-13.4892
14.097	133.903	61.6461	101.191	4.86071	0.354015	28.5378	-8.39221	-66.5765
15.4847	133.9	76.7729	89.9946	4.86123	0.399121	31.0534	31.5622	4.02025
23.3752	142.541	68.9821	107.982	4.86191	0.391296	41.5149	-2.78355	-69.452
13.8247	133.895	93.0789	180.658	4.86669	0.372576	13.8161	-30.7793	-40.9614
3.31828	159.574	80.8705	116.204	4.85292	0.380785	8.90475	-25.5334	-35.4507
18.4681	142.414	65.6306	77.1133	4.86091	0.368613	-8.95258	-5.93244	6.70764
12.4137	139.465	64.959	58.8246	4.87008	0.407014	6.3923	41.0727	-24.2988
13.8158	166.572	69.919	132.199	4.85663	0.372471	41.7333	-12.953	16.9906
13.5302	169.266	73.3677	105.959	4.86158	0.364224	37.2644	-29.8744	-53.761
9.07901	153.434	70.5764	86.1705	4.85484	0.338337	-0.418089	34.9918	-27.5392
7.64591	153.052	101.523	146.447	4.86299	0.357838	-11.0595	26.7748	16.2429
17.6782	127.639	93.366	151.503	4.85485	0.36738	-15.8041	-39.3794	17.0271
19.2353	148.167	79.4109	155.901	4.85604	0.367196	-49.3983	30.8802	-49.698
6.19612	137.203	73.3296	125.474	4.86329	0.345238	37.304	-1.10259	-34.081
15.3748	148.71	79.7352	143.951	4.85198	0.392207	-9.80365	56.2401	-61.9056
15.1394	119.881	72.4151	94.9465	4.85596	0.373911	3.50248	6.34456	-82.4551
15.1872	133.435	63.1843	116.639	4.86141	0.366936	52.6166	-15.9559	-4.25783
13.4455	140.625	93.2359	123.099	4.86127	0.34449	-1.47615	-12.9388	-59.0047
14.0642	141.799	89.1302	114.275	4.86147	0.364534	23.0984	-4.76907	-52.2924
6.79269	159.247	90.6882	123.945	4.85414	0.380269	-6.14352	9.63392	3.66651
5.09945	145.366	94.1125	114.144	4.86186	0.374454	9.98545	-15.0318	-10.3124
19.2068	152.158	95.7309	137.087	4.86277	0.361402	47.7992	-65.9677	-97.8862
20.445	172.753	57.0251	85.5997	4.86596	0.374695	3.08825	-3.69802	-49.2527
8.23816	159.282	80.8777	153.959	4.84845	0.371084	-48.6818	36.4246	-1.68765
12.9411	163.747	74.3252	116.133	4.86074	0.371709	23.5564	6.15482	-56.5947
19.1605	148.759	66.3766	77.047	4.8594	0.373117	70.272	-18.8711	-54.3476
6.35588	158.094	94.6368	107.221	4.85839	0.365763	11.813	-16.1256	65.0444
7.81049	148.159	73.0544	92.1011	4.86402	0.343139	21.5511	17.3227	-54.9067
8.63351	128.315	98.1216	78.2728	4.85847	0.40665	10.4	22.6844	20.1336
5.4965	132.568	108.723	147.459	4.8553	0.382484	19.3579	10.2712	0.818651
11.585	142.396	61.407	90.8828	4.85764	0.340547	10.8182	14.0797	-34.0356
14.428	134.117	75.4419	103.321	4.85897	0.383577	-3.33537	34.9161	-14.9452
10.4975	140.814	76.5974	100.508	4.85612	0.372664	23.5822	18.1097	-26.0442
5.18387	133.786	99.698	160.429	4.86378	0.39392	40.5828	-48.3208	-6.43393
9.40068	153.774	75.2499	114.319	4.85425	0.394444	-1.47443	2.06546	-28.6059
21.9473	140.588	72.1405	121.205	4.85453	0.351537	-50.3785	-0.0173087	5.50674
9.04801	138.78	68.6711	64.4652	4.87126	0.399199	-13.6229	40.6157	-27.6296
15.411	184.156	54.4343	127.575	4.85282	0.362816	57.4188	-5.29226	71.6736
22.097	173.171	57.1363	91.5473	4.86186	0.383644	44.6061	-4.23032	-84.2516
5.5616	158.936	69.853	52.423	4.86365	0.322508	15.124	27.2358	-52.1605
7.94298	162.219	112.058	163.2	4.86813	0.358054	26.4083	18.0104	35.5876
22.5856	135.292	71.4367	124.578	4.85674	0.369736	-22.6368	-18.9945	-26.014
23.2879	167.556	64.6101	135.638	4.85641	0.364884	-44.3637	18.7577	-45.6929
7.1167	128.449	76.1252	102.289	4.86232	0.366367	36.4066	17.6545	-11.0834
19.5225	154.043	83.1095	143.161	4.85167	0.40808	10.6644	37.7078	-139.737
16.2119	122.782	73.3951	99.8397	4.85517	0.379825	-4.90111	6.19444	-55.8403
9.76671	114.785	81.9067	142.704	4.85622	0.38816	11.3512	-12.0683	33.2729
10.3545	131.069	112.595	149.856	4.85851	0.361353	3.76643	-23.3446	-55.1526
4.195	155.098	73.6259	107.457	4.85247	0.361581	-19.6972	-7.94412	-54.3535
12.2679	150.374	62.2782	148.624	4.85244	0.394058	13.6592	-20.3196	30.6936
3.17492	155.943	114.357	128.248	4.85839	0.407705	3.66314	-70.9937	-7.75718
22.0515	152.505	95.2543	144.022	4.86107	0.374456	27.4244	-56.3631	-114.201
21.0671	134.378	62.555	87.3076	4.86715	0.374835	17.1194	-2.31074	-64.4759
16.3578	154.955	75.3591	115.588	4.85393	0.36822	-17.395	18.447	-44.3607
12.6398	182.33	76.9994	111.518	4.86312	0.399454	18.4364	-1.99857	-56.9774
11.9774	192.306	76.798	115.249	4.85915	0.387894	36.9221	-24.4434	-4.06441
12.1968	127.932	92.7543	110.257	4.8553	0.377192	-14.1674	-6.4378	3.7758
11.7184	140.252	79.856	98.2832	4.86509	0.340789	8.69343	9.1688	-99.4209
6.28018	130.482	91.7205	97.9563	4.86117	0.403391	29.3963	25.5559	20.8193
5.29683	165.392	130.778	150.446	4.85775	0.367582	31.7592	7.89988	-67.136
13.4067	149.18	65.6885	91.9977	4.86056	0.339431	45.6839	-11.2711	4.309
15.7994	130.198	83.4777	120.221	4.86061	0.379822	15.3706	2.28772	4.56953
2.84671	148.642	85.9634	104.08	4.85885	0.344762	22.9182	10.9223	73.5397
6.15651	159.585	86.5647	195.609	4.85892	0.39005	37.7776	4.32761	-59.3971
9.66542	180.199	73.0463	108.124	4.85234	0.395218	-35.8183	22.5691	-0.0264665
14.9219	138.334	69.1552	117.176	4.85746	0.35433	-15.2439	-7.88007	-16.0953
11.3364	139.975	80.8525	97.7595	4.86535	0.385784	-8.19183	22.4931	-35.2414
14.9507	166.108	70.976	133.416	4.85903	0.352513	15.2334	4.67192	22.152
20.4354	160.355	64.423	91.3001	4.86304	0.371868	34.9143	-2.38088	-68.6414
4.31447	166.344	78.7701	107.81	4.85797	0.347044	36.9543	7.53356	-27.0175
10.6115	152.835	125.544	171.142	4.87014	0.370109	40.4796	-12.2129	17.9319
26.7448	137.934	74.5629	70.4757	4.85464	0.363221	-39.9017	0.757121	-9.27396
16.9764	153.11	75.1006	142.981	4.86169	0.357514	-17.0539	10.9649	-40.1874
8.66699	140.027	71.0315	149.079	4.86217	0.385671	44.2721	-8.66399	-8.53917
17.3985	145.581	89.1129	156.271	4.84926	0.414995	-5.9869	18.327	-86.1432
18.2235	124.775	70.1801	113.89	4.85419	0.393806	-6.36506	26.7194	-61.1152
9.75683	135.718	76.2359	154.494	4.85434	0.364966	19.9941	4.01858	37.0763
11.8069	130.221	113.04	158.868	4.85458	0.364004	-11.5033	-27.7825	-71.2795
8.3657	154.429	70.8244	100.284	4.85433	0.350313	-13.0383	-10.0938	-77.6594
10.8824	161.483	86.4023	135.178	4.85526	0.383799	9.33579	-22.5912	-55.1724
8.53598	151.679	105.421	123.667	4.86134	0.382486	8.58104	-30.9139	5.94483
20.0758	143.647	79.9864	100.877	4.86633	0.372219	36.0199	-31.7786	-104.038
20.9653	140.036	59.8752	90.2985	4.86395	0.371126	6.27647	-0.749463	-58.7563
19.3047	159.37	73.6578	115.645	4.85292	0.364815	-25.3708	16.847	-50.8355
5.41167	147.748	90.3591	86.9193	4.86805	0.381899	58.1123	-25.3764	10.6892
16.6137	167.892	63.0993	89.9196	4.85688	0.391798	2.45923	-23.9476	-29.1564
13.0598	139.459	75.8946	82.2595	4.85671	0.379887	2.05687	1.56031	5.52498
13.9094	141.403	85.6318	97.2755	4.8642	0.345633	8.04319	9.98241	-108.292
17.8285	151.64	77.9441	92.041	4.85813	0.399868	-19.7637	43.6681	-35.5872
10.1761	151.932	104.536	136.432	4.85901	0.361023	27.0237	3.03099	-52.4939
19.9206	137.78	51.3521	90.0119	4.8607	0.369529	42.822	-15.0231	-3.25403
26.4184	136.938	93.911	150.724	4.86855	0.354807	36.4621	-44.4486	-54.2468
8.57656	161.605	79.2209	117.977	4.85721	0.355134	13.7776	3.87503	72.156
21.1916	162.62	70.3606	188.857	4.85909	0.38203	-7.76864	39.1601	-115.076
13.3992	174.28	70.8056	113.467	4.85293	0.390302	-30.4431	24.1274	-34.5604
16.1393	122.271	60.9965	121.635	4.856	0.340764	-12.7984	-36.3576	-6.08715
10.2301	133.57	83.3097	82.5508	4.86728	0.389684	-6.02655	24.513	-37.7762
17.1688	167.859	66.4807	104.917	4.86633	0.356127	39.6746	-4.68866	-3.85299
22.9139	150.472	73.5369	123.09	4.86033	0.359482	16.1299	-26.3251	-40.0827
7.32057	167.407	68.4998	84.8129	4.85489	0.37313	30.7356	28.9621	-73.8985
7.14678	166.471	110.657	149.261	4.86404	0.393762	31.6193	19.6067	17.9342
27.3008	160.396	73.7737	74.0915	4.85939	0.375142	4.63749	9.02725	-14.9483
15.8402	156.284	80.0922	154.335	4.85957	0.345904	-37.7581	15.0619	-52.497
9.38898	133.891	85.6778	141.846	4.85806	0.39204	20.4076	8.71326	-12.7748
8.43043	140.354	62.4603	73.4501	4.85898	0.414078	23.5392	30.9748	-66.1502
18.8715	123.799	62.1313	128.519	4.85765	0.372149	23.3419	-8.36098	-22.3328
9.77507	138.989	94.2024	140.114	4.85564	0.367776	31.456	-1.99781	-5.3358
14.6151	127.648	92.3303	145.012	4.85536	0.370676	-28.3583	-6.62215	-25.743
3.80798	161.153	81.9514	117.925	4.8541	0.362819	-7.58396	-27.1029	-42.7859
5.70916	153.14	93.7834	134.456	4.85717	0.394557	31.5487	-8.95162	0.763734
6.65987	149.094	120.128	156.285	4.85686	0.372598	-10.4819	-40.5191	53.5715
18.9147	146.983	78.717	114.613	4.86682	0.363269	33.2991	-26.197	-58.8338
23.2534	150.912	52.5999	76.8259	4.86892	0.37571	26.3008	3.16046	-14.2234
19.6067	165.12	82.2762	119.452	4.85077	0.362891	-29.2806	7.87956	-90.3398
8.12592	153.786	92.9124	87.3839	4.86664	0.377737	40.3558	-10.5723	-14.3889
13.0551	157.872	59.6337	110.897	4.85341	0.401022	14.5347	-17.6169	-33.5219
15.4352	134.501	89.6411	91.9814	4.85142	0.404278	23.4221	-22.5205	104.175
11.9448	141.608	89.0552	112.57	4.8596	0.353968	-19.3172	20.344	-103.785
7.24334	140.522	86.9492	137.66	4.85315	0.383385	-32.2705	25.424	14.0939
10.6466	139.816	101.923	152.341	4.85352	0.357649	18.093	8.93795	-55.3347
19.6271	136.807	53.3371	93.7046	4.85879	0.378746	25.5075	-5.67764	-26.243
20.5511	143.751	98.9153	147.144	4.86589	0.358773	27.2484	-38.7421	-47.9382
13.1995	162.951	69.0832	123.208	4.8649	0.357742	35.6282	4.23785	44.7907
17.3379	149.241	88.2598	157.1	4.86503	0.369745	14.1747	16.2521	-59.0994
4.63349	187.366	74.1272	90.9836	4.85838	0.396522	-20.1675	26.0699	78.716
11.9703	122.715	69.9057	128.851	4.85605	0.347063	-13.4999	-32.5672	-10.7006
7.95495	130.836	84.758	74.0377	4.86464	0.399392	-5.79569	29.7615	8.85384
23.0344	147.729	65.8336	110.355	4.87441	0.358316	41.5402	-1.01981	-47.9311
24.7215	164.532	72.4311	161.055	4.85523	0.351662	-7.25896	-9.55738	4.03639
4.76825	157.588	56.5405	58.468	4.85474	0.352488	4.14019	0.253712	-13.1052
20.7587	162.644	93.872	130.104	4.86108	0.384045	3.02605	7.9064	-21.4877
20.822	175.492	76.6375	74.6127	4.85378	0.391992	6.23951	22.7504	-43.6044
20.1145	168.479	80.2663	119.949	4.85729	0.36955	-6.12454	21.1119	-47.0461
7.73775	144.421	92.3912	145.083	4.85606	0.393324	12.6609	1.48605	-27.197
12.2957	151.646	62.0997	83.7528	4.85993	0.395921	-7.18523	32.4116	-60.0936
17.279	138.061	65.0203	121.286	4.85936	0.371112	23.0207	-5.4799	-0.752674
4.19949	147.62	95.6896	134.225	4.85248	0.346376	12.5191	7.73407	-16.3881
18.2609	147.245	104.244	184.312	4.85368	0.380169	-38.4093	-1.1976	33.2502
4.18124	182.467	78.9729	97.3522	4.85552	0.360266	-32.0953	-20.0808	-49.6155
7.31131	146.094	61.6625	86.1788	4.86291	0.427377	73.5893	26.7516	-52.4085
7.63357	156.72	113.49	151.006	4.85765	0.372035	-12.2924	-30.8548	67.266
14.4994	147.444	99.5216	144.034	4.86791	0.365673	50.6661	-16.6594	-68.5484
21.5348	156.884	68.3974	96.6587	4.86407	0.361678	-3.82372	9.62093	-16.8824
18.3766	186.105	87.5061	163.856	4.85215	0.357998	-24.682	6.61756	-36.5569
11.0955	155.76	86.3541	91.0999	4.85997	0.388965	21.2752	9.43623	5.11967
15.3342	163.716	83.0667	130.976	4.85832	0.394028	21.0064	-69.4975	14.6918
20.8009	143.543	94.1073	117.656	4.85163	0.411863	10.5198	-36.5085	3.84579
18.1878	150.732	78.5033	87.1764	4.86003	0.356179	-4.33204	16.0801	-88.8406
19.9211	119.706	57.0599	68.8029	4.85718	0.366592	4.41793	12.5169	-85.1648
16.4182	148.523	89.1068	138.247	4.85997	0.375069	17.4724	18.9742	-76.8841
14.7811	128.564	69.3658	120.351	4.85916	0.386544	46.0138	-19.0137	-24.2599
14.4766	153.003	91.2215	144.604	4.86425	0.359129	34.8021	-34.6842	25.2064
11.6334	169.844	53.9519	87.7485	4.86523	0.368003	57.2026	1.52165	83.1774
13.52	139.988	93.8239	148.372	4.86394	0.380572	50.1758	4.3445	-13.8107
9.81484	177.362	85.108	144.089	4.85557	0.395074	-33.1189	41.8465	33.4348
12.5975	137.818	68.0766	132.819	4.85515	0.32333	-25.6911	-27.6476	-11.6019
11.7528	132.786	90.9312	97.1258	4.86562	0.386498	-3.08298	3.87157	-2.29722
17.2283	145.382	75.8136	98.3743	4.86953	0.372933	2.81127	13.0216	-40.4828
18.6866	170.283	63.5454	103.782	4.85477	0.355631	26.2322	3.81498	10.5917
12.0904	136.185	61.694	81.4094	4.85927	0.346141	15.4894	2.84603	-9.49896
22.7404	168.499	109.552	142.449	4.86387	0.39743	-19.2241	9.21219	-21.58
22.4626	158.747	81.2002	88.1358	4.85502	0.394894	14.7649	18.9074	-42.9966
13.164	178.409	83.6317	132.696	4.85937	0.364115	-10.4229	16.5204	-40.8658
12.3982	131.246	96.7158	118.55	4.85475	0.400803	-2.30857	20.0814	-26.2164
12.4172	144.879	71.4742	67.1126	4.86386	0.377739	-13.2284	8.98409	-41.4985
24.8619	144.388	66.4878	101.85	4.85802	0.386401	55.738	-3.49068	-7.27836
17.4465	131.694	90.6911	138.748	4.85808	0.367936	22.9189	19.9424	-32.8771
5.58156	156.635	102.222	94.4809	4.85241	0.417196	-20.3952	15.7572	34.0955
2.35491	196.342	88.335	138.805	4.8557	0.352019	-11.3894	-28.1082	-27.7416
19.3088	157.121	81.9282	149.479	4.86247	0.416644	6.70225	23.9222	-21.0638
10.0932	160.421	92.3553	197.54	4.85713	0.354314	-6.92564	-2.19094	66.047
16.7063	148.118	92.3636	146.148	4.86697	0.378254	35.5911	-3.35824	-56.3241
27.7397	171.122	77.7967	121.933	4.86632	0.38573	-16.6316	22.0843	-23.8737
21.3062	167.346	73.1673	124.262	4.85347	0.379062	21.8848	14.2092	-70.5827
13.1125	175.246	84.3968	72.4523	4.86403	0.392404	-0.285267	28.2115	19.4804
17.5579	169.066	79.2211	109.558	4.85805	0.39637	20.0516	-59.3537	1.78867
12.9646	149.819	86.9504	133.083	4.85351	0.388561	31.128	-38.5174	61.3796
14.5878	140.267	78.9549	93.589	4.85843	0.400298	58.3323	19.8886	-81.6959
16.8841	126.272	62.7256	65.6081	4.8574	0.369919	8.15986	16.3016	-64.123
20.1371	135.251	94.6956	136.708	4.85691	0.397034	16.274	2.80825	-60.1425
10.5538	131.023	86.4998	145.892	4.85463	0.41298	48.6098	-21.5253	3.04886
15.1361	150.397	95.6846	144.8	4.86604	0.369307	40.3387	-35.139	7.22972
18.7446	148.157	65.4329	116.297	4.86434	0.374097	26.0454	-2.80618	0.910689
11.8931	139.739	98.3369	153.38	4.86361	0.37588	58.0655	9.95187	-20.5922
15.9651	160.261	51.7945	140.603	4.86442	0.358329	-37.811	15.6022	-29.6235
14.5928	144.539	70.5913	133.971	4.85429	0.328648	-31.4436	-21.9573	-28.7738
12.107	131.912	88.5078	90.6072	4.86447	0.386435	-9.82605	6.00575	-5.92684
15.6728	163.466	77.1531	112.001	4.86512	0.38766	5.58673	0.104952	-47.6732
16.206	151.697	51.6154	75.9149	4.86107	0.347681	41.3499	36.7633	-38.0778
9.34998	127.789	58.5682	79.0181	4.86106	0.340213	23.1316	-11.4105	7.07034
12.9315	135.324	109.91	105.051	4.86823	0.374381	-27.2477	-34.5749	-9.04679
21.7637	167.549	80.0236	104.714	4.85135	0.369935	-2.85118	7.96398	-44.5849
13.5368	187.769	64.6412	89.4822	4.85633	0.363269	8.99535	0.286641	-102.866
10.2653	122.308	108.583	113.603	4.85532	0.393003	4.08345	23.1898	-11.4002
11.121	146.432	71.3678	76.5996	4.86484	0.369785	-21.5174	9.44504	-29.0167
22.272	137.186	76.4099	93.9525	4.86145	0.395628	40.987	-12.7379	75.2365
26.3861	129.073	96.1929	134.856	4.86036	0.384908	37.6302	19.7524	54.5444
9.72878	138.691	72.3105	122.726	4.85705	0.378681	0.733801	19.2937	26.4748
15.6832	166.121	92.2359	155.613	4.85855	0.369399	19.7987	-13.8341	-13.6876
18.598	159.03	90.217	157.284	4.86591	0.395807	2.25302	20.775	45.0298
13.3856	165.976	75.3069	166.2	4.85603	0.334174	-19.4167	13.2335	7.92248
16.2583	154.838	98.7524	146.035	4.86886	0.377505	27.2094	-11.647	-38.4159
22.9524	173.518	70.7724	87.987	4.8662	0.374725	-11.2533	3.82004	-68.22
19.5676	162.532	85.0815	153.408	4.85417	0.362472	13.3998	9.09996	-34.783
14.3252	187.722	66.9648	71.3966	4.86407	0.371139	-38.0988	5.23734	8.05628
12.7084	165.546	91.1013	103.951	4.85709	0.407098	21.1138	-31.21	-24.9513
16.4581	143.361	75.811	96.0308	4.8535	0.389459	26.2633	-12.7295	20.8946
10.219	139.612	77.8008	115.246	4.85163	0.386356	66.5269	13.7759	-71.8433
21.626	121.794	79.3861	139.649	4.85687	0.368849	47.6738	3.09345	-68.8183
21.1996	140.64	100.926	157.259	4.85865	0.400892	36.0482	-1.36363	-61.7604
13.6976	152.431	82.1259	153.589	4.85637	0.385135	13.9692	-0.560059	-26.2717
17.003	135.542	94.12	102.022	4.86805	0.385761	42.4009	-18.8924	55.3659
10.181	130.533	68.2353	137.168	4.86216	0.40208	55.6989	-12.7236	68.1453
9.39816	142.327	100.431	161.248	4.86599	0.36832	69.3463	11.9018	-13.6172
15.338	150.742	81.0328	167.738	4.85686	0.377043	-22.2755	-6.90791	-44.7548
14.4019	140.523	69.8426	130.489	4.85585	0.337526	-7.4063	-21.2625	-32.3147
13.8364	147.537	89.8385	55.9042	4.8664	0.410858	-21.6822	-1.00392	-14.0136
14.8228	182.613	84.2616	94.5005	4.86936	0.38176	-11.4463	-20.0394	-81.8566
17.3409	160.392	68.9309	76.5223	4.86264	0.381963	43.6494	32.1881	-29.2193
10.1721	138.501	68.2315	88.263	4.8624	0.348308	13.9768	-26.4087	-6.78017
14.7701	152.842	74.6261	114.042	4.8642	0.393745	11.5728	-1.42213	-19.5368
15.7144	135.729	87.046	102.884	4.85488	0.366781	11.0234	-1.57538	-16.6513
15.5539	164.897	82.6554	115.076	4.88147	0.375844	12.2589	-1.46908	-14.9529
16.7521	119.875	65.0481	102.656	4.85658	0.346474	14.1802	-1.32465	-19.6553
16.4488	173.142	89.5741	116.205	4.84939	0.334967	11.5449	-1.80494	-14.7248
13.5554	181.011	69.0847	106.687	4.87491	0.370999	12.1875	-1.46032	-16.7276
12.1128	137.635	66.9441	109.336	4.85718	0.313456	12.7185	-1.29155	-21.7956
15.5865	149.397	80.2596	114.58	4.91946	0.385038	11.0659	-1.50874	-18.5985
15.9622	153.467	77.366	125.587	4.85905	0.419514	9.97882	-1.62039	-21.8898
15.4629	153.399	76.6582	114.93	4.8663	0.405007	11.519	-1.45196	-20.2741
16.2669	153.508	83.3966	121.255	4.85067	0.420333	10.3516	-1.54036	-19.8739
17.249	150.972	83.6418	106.663	4.85794	0.410428	12.441	-1.50404	-21.7443
11.0126	137.83	72.3899	124.035	4.86668	0.332679	10.2266	-1.29441	-17.6034
14.8994	141.782	75.9579	115	4.89897	0.374375	12.1726	-1.39821	-19.4369
14.712	145.762	80.1291	116.494	4.94605	0.372513	11.2954	-1.44062	-18.647
15.0736	151.214	72.7582	118.69	4.92158	0.400687	11.6425	-1.31988	-19.8253
15.0248	141.603	81.362	112.667	4.90016	0.401029	13.3193	-1.04864	-12.9962
16.4082	139.847	85.9176	103.264	4.87578	0.403513	13.3332	-1.58088	-19.9286
14.9297	151.529	74.7035	110.725	4.85316	0.389906	10.9144	-1.36822	-19.6384
13.3433	173.515	101.846	126.235	4.86792	0.339503	7.76549	-1.75988	-14.7107
14.9206	153.622	72.3247	114.686	4.86893	0.403458	11.0712	-1.49473	-16.3386
15.2056	149.531	69.2801	116.876	4.97594	0.371809	11.531	-1.403	-20.3212
14.9898	160.993	62.7638	129.543	4.85856	0.425873	10.278	-1.44392	-26.5463
15.5723	150.733	78.2079	116.212	5.04531	0.387822	11.3165	-1.53008	-19.5121
14.638	151.623	59.4654	119.417	4.84206	0.335948	10.7411	-1.32062	-20.3281
15.4088	145.056	81.3504	110.227	4.90345	0.386537	11.8148	-1.49768	-19.5908
11.576	158.851	76.3074	126.264	4.86367	0.312525	9.19236	-1.50526	-17.7105
13.7016	141.6	77.9816	112.066	4.86619	0.393776	14.3051	-0.775576	-13.1935
14.2097	131.048	83.439	119.558	4.86627	0.371216	10.4822	-1.43345	-20.654
14.8972	151.275	78.5348	118.642	4.7935	0.396513	12.5159	-1.14898	-18.4172
15.8944	151.753	71.1775	113.892	4.85964	0.40079	10.3198	-1.792	-25.2845
15.0274	114.211	82.097	117.47	4.86111	0.350692	9.04899	-1.62066	-19.0655
15.5212	178.143	73.5306	125.04	4.86741	0.401165	10.2104	-1.73161	-24.104
16.1011	130.603	62.3232	98.8322	4.85614	0.341207	14.5533	-1.31527	-19.6922
15.4742	168.741	90.5514	133.746	4.85367	0.347804	8.77899	-1.82416	-13.2651
13.1906	179.349	64.4149	105.911	4.86221	0.359215	11.4876	-1.53372	-16.7125
12.9458	148.09	69.3967	113.866	4.85938	0.345645	12.9666	-1.13903	-19.1319
12.1697	150.705	67.3389	107.223	4.87614	0.349368	13.0784	-1.07052	-17.8207
15.4088	137.404	86.3725	105.394	4.85745	0.432328	17.1201	-0.208133	-8.49757
15.3757	145.328	130.946	78.6849	4.86462	0.412439	18.3799	-0.516879	10.8591
18.5121	174.108	66.1212	121.254	4.85897	0.403302	7.67372	-2.77298	-37.6266
16.3945	196.855	88.7744	71.4897	4.85835	0.365913	16.0123	-1.48432	-14.3999
12.0813	137.511	69.4189	122.753	4.84956	0.370802	9.38527	-1.57478	-22.0985
14.7943	142.983	76.2232	114.317	4.87051	0.372543	11.6	-1.41089	-19.1559
15.5018	159.588	77.3213	115.273	4.86923	0.354189	11.1825	-1.72389	-21.1117
9.02456	178.145	77.4499	174.396	4.85094	0.351827	0.175421	-1.90126	-27.6397
6.19349	133.82	77.1824	140.379	4.86798	0.3452	11.4646	-0.145819	-0.00866208
15.8808	171.803	90.6658	123.392	4.86269	0.38402	3.83896	-2.77839	-29.0881
15.3147	159.255	85.332	115.678	4.85645	0.401979	7.62197	-2.00042	-23.0604
10.3444	157.376	106.484	124.601	4.85749	0.355588	9.65044	-1.0785	-9.40257
14.1222	133.355	63.8776	115.458	4.86016	0.366328	8.80849	-1.6785	-17.3318
15.1454	150.928	81.2592	108.866	4.89263	0.37662	12.1944	-1.37251	-16.3432
15.3454	157.055	52.157	115.149	4.86205	0.345703	10.0328	-2.16372	-36.4273
18.0959	168.627	89.4076	110.112	4.8649	0.404587	8.49631	-2.45586	-28.2989
14.246	143.647	60.1674	109.413	4.85416	0.32591	12.7741	-1.23465	-20.2486
17.3543	126.16	54.3787	104.159	4.85282	0.381914	12.7181	-1.37447	-19.1257
7.52186	143.185	68.9586	171.891	4.85765	0.326518	2.3234	-1.6057	-23.3419
11.6831	131.16	83.5194	108.46	4.86449	0.381348	16.2926	-0.2242	-6.31483
15.0548	120.357	81.9976	109.71	4.86138	0.378833	15.5902	-0.733392	-12.1682
15.1189	154.805	72.0262	116.621	4.8345	0.374777	11.5297	-1.54056	-23.1425
16.0341	142.869	62.8286	109.585	4.85938	0.3987	11.2529	-1.67106	-26.1912
18.5542	119.205	71.0782	131.488	4.85713	0.350901	0.717498	-3.17681	-35.1706
12.5491	168.339	73.6407	142.904	4.86595	0.389779	7.88298	-1.5274	-23.3367
16.557	136.15	55.4436	94.6102	4.85689	0.330906	13.5341	-1.51201	-22.6383
15.7331	157.685	82.9825	122.217	4.85649	0.366658	9.76487	-1.83191	-18.0342
11.2691	163.223	71.453	85.959	4.86506	0.353386	16.9986	-0.697561	-1.40977
15.4464	203.345	73.5844	167.787	4.86182	0.358101	-2.67443	-3.96609	-52.2571
10.2484	128.981	83.2406	94.8579	4.87212	0.376552	17.0806	0.1226	0.840991
16.6347	158.474	94.8296	110.982	4.85956	0.441481	13.3289	-0.781335	-7.97405
15.1043	153.658	102.187	91.0725	4.8653	0.384685	15.2924	-1.08371	-5.47009
15.1853	168.899	74.1393	139.371	4.85745	0.387293	3.34209	-2.74348	-33.3988
16.6206	211.037	84.5264	78.0921	4.86069	0.385109	12.2352	-2.11218	-21.929
13.9851	156.751	57.5605	89.3088	4.8528	0.411063	6.66011	-2.9986	-37.907
14.8751	128.353	58.309	127.615	4.86983	0.345082	8.91279	-1.80849	-29.2853
20.4915	175.576	75.4599	123.37	4.86882	0.322618	6.98568	-3.06715	-31.3866
3.65687	153.513	112.373	187.778	4.86339	0.362216	-1.83735	-0.468156	-3.15869
8.78411	146.551	78.519	163.434	4.86189	0.365155	1.16937	-1.82137	-16.4413
16.2466	175.109	73.0261	138.18	4.855	0.368663	0.255305	-3.37215	-41.4578
9.26213	129.021	106.484	135.88	4.85342	0.415504	5.3381	-0.832867	-4.76883
8.11625	158.015	123.364	119.049	4.85716	0.33902	12.9937	-0.230829	4.39009
11.1832	129.898	93.4752	157.147	4.85423	0.379081	-0.644517	-1.99706	-6.2914
11.3968	139.658	82.177	133.569	4.86343	0.403135	6.25638	-1.44768	-12.0476
16.2219	158.296	68.1155	113.39	4.85674	0.353474	10.8193	-2.0106	-27.5816
13.4475	140.709	96.5587	106.752	4.86701	0.359227	24.7831	0.487817	10.8006
14.8755	126.899	61.9932	100.892	4.86132	0.343737	14.7598	-0.756621	-21.7394
16.8261	131.983	66.4032	114.632	4.85692	0.391144	10.041	-1.69952	-22.4996
11.3456	133.359	59.0234	129.545	4.85666	0.330035	10.0716	-1.21865	-22.97
5.52794	117.226	73.8743	98.251	4.8588	0.366878	20.5548	1.35179	10.87
15.8812	114.148	75.4911	88.8264	4.85708	0.386555	19.3385	-0.733179	-16.7853
16.3938	138.886	59.9624	85.6234	4.84988	0.374532	17.6061	-1.11722	-20.0342
20.604	162.582	58.6338	104.38	4.85851	0.405356	10.6212	-2.87187	-43.8021
18.2952	132.994	94.2267	163.356	4.86146	0.358005	-2.49945	-3.14689	-35.7621
8.25482	151.059	87.0045	147.683	4.86476	0.372608	10.3071	-0.3643	-15.1698
14.1297	151.186	58.5785	105.416	4.85195	0.342349	8.80206	-2.55078	-22.2474
12.4663	126.757	87.4186	152.244	4.85481	0.359216	3.66257	-1.40023	19.7043
12.9282	154.183	70.1732	76.5819	4.86249	0.373179	15.0105	-1.10792	-10.3709
21.8967	196.718	83.6791	146.698	4.85634	0.37731	-2.47881	-5.03891	-67.0754
18.0711	133.296	56.0281	62.4264	4.86263	0.362171	21.01	-1.12747	-17.1398
16.8098	160.881	69.9229	67.9821	4.85346	0.391618	20.3634	0.0263859	-2.02681
13.6532	147.226	96.0369	89.9532	4.85879	0.394064	12.6	-1.09562	-9.7497
24.8497	173.75	81.1926	144.355	4.85722	0.372302	-0.95312	-5.21438	-68.9406
17.0773	194.369	77.5856	75.3417	4.86055	0.384335	13.8689	-1.91999	-21.7236
9.79616	134.984	70.2174	101.757	4.86306	0.415057	9.91327	-1.57564	-13.8508
9.69295	147.619	61.7919	118.208	4.8659	0.354859	7.99005	-1.26617	-21.1822
19.0353	180.16	111.14	159.284	4.85769	0.423814	7.54894	-1.99104	-17.2635
5.50262	152.083	111.328	177.21	4.86295	0.368952	-1.32042	-0.680075	-7.16914
6.87501	150.554	91.8631	154.695	4.86673	0.374452	1.92957	-1.41181	-4.36178
16.1449	176.705	82.4806	91.7142	4.85546	0.408665	15.8185	-1.54248	-27.0481
11.6629	136.048	82.6637	124.328	4.85604	0.396706	9.7423	-1.06884	-15.992
10.6895	154.642	88.1824	118.446	4.86111	0.348214	13.6369	-1.18248	-31.1315
16.2111	134.597	68.3607	117.099	4.85874	0.380821	7.32593	-1.66418	-11.8627
6.38253	119.655	81.0126	113.432	4.86713	0.374145	20.4226	1.17569	14.5456
13.9749	163.041	60.1274	133.053	4.85872	0.338388	7.44312	-2.04525	-21.5373
12.9734	147.798	90.0542	101.444	4.867	0.359704	22.7912	0.13677	3.41374
15.9344	127.812	78.756	112.859	4.84883	0.361713	17.7033	0.214768	-32.9128
15.4233	114.468	62.4812	107.115	4.8575	0.396812	12.6856	-0.939327	-15.1957
5.47167	120.151	88.8739	164.359	4.85841	0.376589	2.23409	-0.176254	-4.7293
4.33573	120.756	74.4171	108.827	4.8609	0.37514	21.217	1.76201	13.3127
14.3227	128.046	90.2566	83.7209	4.86338	0.360012	26.9364	-0.271569	-29.8834
8.44646	127.789	72.0319	97.5903	4.84782	0.362117	17.7251	0.424081	-5.42523
16.9068	119.831	72.5479	127.622	4.86486	0.353311	10.8694	-1.32706	-23.2497
22.3672	139.157	69.2946	157.426	4.86055	0.365298	-3.48686	-4.79756	-75.5363
9.50857	151.315	96.3324	139.508	4.87016	0.378817	17.1078	0.315734	-20.9819
9.88213	154.444	62.7283	115.896	4.85569	0.352357	6.96965	-2.06561	24.0371
12.6326	124.83	89.8762	147.295	4.85511	0.364219	5.53226	-1.27147	15.8312
9.33447	137.66	63.7474	65.4431	4.87224	0.345026	22.2638	1.5137	-22.9366
20.9367	204.125	80.8082	165.14	4.86619	0.369356	-9.89013	-6.95753	-93.0429
22.0402	127.314	57.5843	56.4373	4.86613	0.367451	18.2983	-2.25054	-29.2568
8.44959	130.138	100.552	106.416	4.85891	0.379459	25.649	2.51294	14.2839
16.795	149.793	109.857	108.559	4.858	0.404377	7.06786	-2.06961	-9.45779
21.4902	188.414	91.4721	177.946	4.85951	0.38496	-6.44818	-5.27059	-63.8407
16.582	157.877	66.145	91.8424	4.86266	0.382255	12.8306	-1.25028	-3.16856
19.6564	177.27	65.5818	141.236	4.86744	0.372063	-3.03226	-5.48063	-81.3478
8.90792	140.175	68.6938	134.347	4.86553	0.361159	5.61191	-1.47392	-16.9723
13.9574	165.425	99.5745	148.962	4.86056	0.404577	4.85997	-1.80879	-13.5284
11.3293	158.808	107.86	155.067	4.86331	0.367796	2.82479	-1.69751	-8.28345
10.2963	141.895	87.1084	130.271	4.86227	0.36664	4.77114	-1.13072	-12.0908
13.072	187.228	90.2694	97.3441	4.85578	0.409984	14.2166	-1.6518	-20.8879
13.6729	124.461	84.8495	112.369	4.8576	0.401738	6.6626	-1.62162	-20.8848
9.79603	169.855	96.9894	103.06	4.84806	0.37033	8.61739	-2.80242	-70.8946
21.7979	122.973	64.7144	132.668	4.85178	0.317124	-4.06467	-1.38732	16.6795
10.0961	128.294	74.3342	80.136	4.86564	0.396106	21.7391	0.397459	-5.14045
12.5212	172.333	66.8322	109.104	4.85932	0.355285	16.764	-0.574008	-18.4019
15.7757	154.22	98.5757	123.996	4.86674	0.360083	18.9256	-0.928606	-12.0457
18.8744	122.576	71.6469	118.079	4.85237	0.366564	15.0283	-0.963434	-44.1422
14.5312	134.864	82.0902	120.604	4.85674	0.404567	11.6822	-0.931035	-12.6184
7.74062	123.229	87.5061	155.313	4.86312	0.361662	8.96542	-0.334938	-10.631
5.12184	117.705	71.0472	74.7973	4.86088	0.387311	26.2532	2.23536	12.0646
20.204	123.401	104.808	92.3056	4.85924	0.370266	28.3459	-1.60894	-36.618
9.03338	124.172	93.245	73.0425	4.85488	0.337809	29.4822	0.429466	-22.037
9.62287	156.713	84.885	125.392	4.87021	0.385276	11.7317	-1.3217	-18.9982
17.9401	136.651	59.3218	140.8	4.85946	0.355356	-0.00033366	-3.14451	-75.2364
13.1273	136.943	82.9981	157.626	4.86325	0.355649	6.1593	-1.72774	-62.1644
15.846	148.573	71.2054	92.3197	4.85809	0.370925	12.9877	-2.60019	-15.1717
19.4497	119.384	81.2698	124.907	4.85739	0.356339	8.61114	-1.94208	15.8716
11.7334	136.055	68.091	56.3697	4.87159	0.358391	30.0283	2.10105	-18.7787
27.4293	160.976	76.6388	117.767	4.86728	0.384378	4.76526	-5.22114	-62.4767
22.6545	108.961	67.9597	118.827	4.86211	0.339263	-1.68045	-4.85779	-31.9154
3.24952	134.055	119.047	125.09	4.85538	0.391228	23.1688	4.29126	12.4021
20.6565	134.56	113.746	125.886	4.86042	0.366254	-0.605823	-3.39935	-42.2976
16.5902	167.273	88.2443	165.629	4.86041	0.379338	-6.73121	-3.67715	-47.7892
19.3783	151.311	59.12	66.4503	4.86312	0.383247	21.097	0.151569	4.88641
17.3542	179.102	71.9085	126.352	4.8642	0.36916	0.428046	-4.53803	-41.8989
4.53054	127.296	58.2626	124.329	4.85994	0.333052	8.32467	-1.14922	-25.553
19.0974	167.623	85.752	124.24	4.85923	0.408518	3.34628	-2.95547	-14.4459
7.54565	149.332	98.6135	167.203	4.85808	0.386161	-13.2896	-2.3226	-0.400452
1.84091	122.526	107.453	199.122	4.85945	0.38031	-25.3016	-1.49916	-44.1145
8.35887	169	82.2937	111.45	4.86311	0.384265	16.8562	-1.28705	-39.2181
16.6683	118.452	73.5055	116.619	4.85839	0.40423	-2.25662	-3.53745	-52.5013
15.6671	165.987	60.4703	66.3742	4.85522	0.36074	11.0712	-4.64267	-83.7632
22.2173	160.102	82.674	164.842	4.85572	0.375822	-7.2995	-3.04981	-19.4787
9.54921	124.585	71.0486	91.4342	4.86294	0.365317	23.1412	0.0357905	9.77834
8.29429	164.593	54.6452	77.1536	4.86118	0.341346	34.0582	2.18539	-21.4028
12.3777	158.886	64.8474	45.1652	4.86301	0.37487	49.4647	0.490904	40.3142
23.2966	119.964	73.961	109.317	4.85353	0.364251	18.0324	-0.653348	-55.5477
12.3456	148.68	85.9564	116.466	4.85637	0.413138	18.9669	0.927147	12.0967
18.0407	117.799	117.584	160.057	4.86389	0.36744	18.927	-1.96293	-37.6272
13.5271	132.559	64.843	97.6108	4.86609	0.381424	14.7168	-0.665809	-13.7993
20.7357	138.719	88.1814	73.6795	4.86028	0.371373	23.8154	-2.33202	-39.9735
10.8317	136.273	77.8933	96.2485	4.85769	0.350919	22.5457	0.0815979	-35.0788
9.42999	142.8	101.271	145.853	4.86708	0.419542	5.65547	-0.220133	15.9494
16.6957	133.139	74.1593	108.621	4.86392	0.360335	2.15223	-4.1858	-87.222
10.7136	135.151	67.948	169.754	4.85843	0.339678	9.87571	-1.1655	-76.5059
17.1532	171.041	67.7022	104.235	4.85225	0.400519	-25.9651	-6.37135	24.0315
14.5849	115.108	90.4995	146.436	4.85781	0.356609	-0.32226	-1.80004	23.2325
14.0754	134.325	67.8061	66.2328	4.86904	0.357824	25.3148	1.08982	-43.2681
22.6311	159.477	89.2827	149.176	4.86417	0.385425	-8.67162	-5.41947	-48.1207
19.3221	117.588	73.8429	72.268	4.86363	0.371776	11.9507	-3.2512	-13.0744
14.5049	149.506	67.5805	51.1018	4.8595	0.381152	14.2809	0.94399	-12.7945
17.1065	136.148	107.728	127.544	4.86067	0.384315	-12.8609	-5.97394	-7.44672
23.5108	145.66	86.697	132.621	4.86339	0.400228	-6.16523	-2.49132	-13.9298
17.6581	156.819	55.6876	73.4019	4.86559	0.370961	23.3824	0.710356	32.2461
19.2638	178.268	67.2546	121.302	4.8632	0.368318	6.08356	-4.55255	-87.382
19.5209	174.696	62.4873	122.386	4.86304	0.338604	-34.1501	-11.3708	-63.5061
13.9029	149.001	66.2695	127.316	4.86151	0.376992	2.11927	-1.75727	-26.951
7.41301	150.381	95.1398	180.595	4.85557	0.375556	-25.6295	-2.99334	33.3502
2.9907	146.037	84.4293	152.758	4.86193	0.391179	-25.8663	-3.15734	-41.4639
14.1445	173.541	69.7346	79.1955	4.866	0.388189	25.8611	-2.21655	-16.8354
19.1558	128.353	67.4574	113.135	4.85975	0.390218	0.281394	-4.91713	-67.698
15.4455	153.77	78.6323	60.6167	4.86213	0.400441	15.7473	-2.062	8.55005
19.7992	155.216	70.969	150.856	4.85333	0.369714	4.04905	-1.01987	-14.354
5.40154	121.305	73.8231	147.571	4.86288	0.370685	-6.90495	-3.67018	37.7845
11.096	175.09	57.7083	93.404	4.8626	0.34745	23.5535	-0.291961	-51.6406
11.8322	166.812	94.8092	76.16	4.86293	0.406727	41.2108	-0.889344	63.9746
23.5639	134.753	67.8315	87.1169	4.86003	0.363835	17.8475	0.25947	-98.146
16.5678	137.862	90.1887	108.658	4.85369	0.416984	34.8771	1.6725	6.40369
18.4456	122.97	106.856	140.514	4.86344	0.365156	23.1097	-1.21357	-24.5971
15.4966	134.705	65.2956	103.022	4.86362	0.376918	13.4161	-1.2641	-2.97853
18.2445	136.414	85.8796	103.745	4.85707	0.368249	32.855	-0.712037	-56.8001
6.14137	119.629	80.0825	78.1464	4.85711	0.361575	20.9834	2.0816	-13.6674
11.8278	134.286	107.352	152.085	4.85843	0.375078	36.8535	8.34221	55.5231
19.2132	122.904	76.9189	131.671	4.86046	0.366132	6.44807	-5.19205	-132.337
12.4504	135.824	70.6567	158.989	4.86045	0.336903	14.9253	-0.476785	-55.1469
19.0869	144.261	82.773	79.9126	4.84964	0.386319	-20.2041	-5.86343	28.1274
6.63833	127.078	88.3543	139.469	4.85724	0.326233	6.40391	3.75767	15.6823
15.2189	133.844	80.3655	95.5235	4.86696	0.367089	21.9367	-0.410876	-47.1759
17.2551	144.871	88.0033	159.636	4.8588	0.377695	-18.2922	-6.42134	-7.62234
15.062	115.001	79.3777	97.1883	4.86292	0.354978	12.5261	-0.782453	0.240523
12.5194	168.94	62.8854	87.9547	4.86044	0.365835	1.30615	-1.15817	-30.9143
13.6185	135.674	118.304	106.313	4.86028	0.394507	-4.53078	-4.54503	44.4722
19.8496	153.525	82.8913	133.578	4.86348	0.419309	-26.1031	-4.73703	56.6913
20.1249	148.969	67.5077	77.3129	4.86908	0.369465	65.4968	6.37323	3.37941
17.9857	182.349	74.1179	133.445	4.85848	0.412957	2.63553	-2.88601	-126.253
20.4344	183.032	68.8441	147.673	4.86181	0.328481	-84.1213	-20.3055	-109.499
9.69513	156.311	49.6353	90.9817	4.86517	0.383819	33.6412	3.46651	-84.9082
6.513	149.93	82.1098	177.318	4.85718	0.362659	-43.7657	-7.88366	-0.618972
4.29917	145.346	79.4919	149.047	4.86413	0.38273	-15.2504	-3.09657	-45.6236
12.8508	151.225	84.1322	100.216	4.86248	0.393102	38.638	-3.09214	13.5737
21.4165	133.461	72.0846	118.564	4.85646	0.402881	-12.4722	-8.59155	-101.678
16.5315	157.191	78.2029	68.2114	4.86393	0.390004	9.74848	-0.961511	43.0185
17.2394	154.13	57.5802	65.8894	4.85594	0.368534	24.1765	5.5988	40.5113
14.1591	145.021	82.7717	130.464	4.86574	0.388	-7.33825	-4.94182	2.46788
12.6759	147.667	79.4812	123.859	4.86723	0.361167	26.5899	-1.98452	-62.8413
16.4243	158.538	83.1036	74.348	4.86366	0.384528	37.5436	0.299882	28.8909
23.3869	123.883	78.888	94.5964	4.86076	0.369301	11.6043	-1.05796	-56.496
9.51657	147.769	81.3558	135.721	4.86077	0.380994	5.26002	-1.58694	-34.1404
17.5397	131.558	113.352	139.865	4.86695	0.370277	21.8025	-2.16264	-49.6302
14.611	134.923	70.9455	115.553	4.86018	0.389293	6.50614	-1.83802	33.3954
14.5103	146.48	108.58	133.657	4.85109	0.375197	49.6127	0.672799	-61.7064
11.4594	120.168	81.653	75.9306	4.85465	0.370315	12.7881	2.16473	-11.0536
13.869	140.201	104.425	167.62	4.85117	0.347599	33.6833	11.6715	36.1725
12.3999	150.696	64.3135	121.997	4.85906	0.372722	23.3909	-3.00265	-145.558
16.5294	144.77	70.616	153.624	4.86304	0.33642	42.0988	3.03922	-28.1971
16.4099	163.686	75.1381	94.3498	4.85919	0.385603	-39.214	-8.16399	49.2728
2.79282	125.765	88.0327	155.677	4.85339	0.305241	0.321541	7.09103	23.8824
3.63059	118.318	102.263	104.962	4.87567	0.379732	32.7285	1.74562	-42.3205
21.0735	133.319	81.8347	171.04	4.85469	0.390753	-17.5894	-5.6556	-41.9216
16.0257	124.623	66.2644	78.5332	4.86934	0.361097	5.57543	-1.96435	-53.5131
7.52706	170.348	54.0446	104.812	4.85594	0.357187	-55.6413	-5.53054	-70.1037
14.2813	133.854	129.249	121.07	4.86532	0.401126	15.9971	-5.70418	4.08089
20.2329	150.458	77.0063	128.94	4.85774	0.421767	-18.6118	-8.25175	-30.5467
20.6022	151.003	72.1831	90.3898	4.87308	0.372961	85.3054	7.62681	-6.43875
16.5066	173.438	75.6747	116.073	4.86182	0.407406	-4.70939	-6.87612	-72.3507
12.4149	164.555	79.9183	132.791	4.85985	0.360811	-53.9986	-11.7516	-10.22
10.7766	169.897	59.3896	88.2422	4.86024	0.376778	35.2302	0.292986	-81.7848
12.1443	153.975	69.4758	107.008	4.86317	0.362752	-85.3748	-9.64354	108.45
6.75508	137.022	76.2323	97.0207	4.86042	0.369567	-17.3916	0.276533	-71.0276
10.4672	154.412	74.3579	117.253	4.85832	0.412758	17.8231	-15.4532	32.6325
18.7913	134.139	76.2117	122.68	4.85702	0.381587	-25.7243	-8.21656	-32.3616
14.7078	153.92	67.3007	66.8389	4.86486	0.371475	22.299	1.38083	13.1269
20.2953	156.794	54.9146	100.255	4.86264	0.353745	21.4177	1.30637	-53.9642
18.6802	155.032	72.5172	146.332	4.86012	0.360442	-18.3408	-1.0082	-39.1323
12.665	157.004	81.032	128.099	4.86582	0.366369	8.24775	-3.74858	-33.7562
17.4984	175.477	66.1507	70.4054	4.86142	0.385474	30.2336	-2.52747	-14.0896
19.2736	132.629	83.861	84.0376	4.85983	0.359967	-2.11639	0.767389	14.6084
5.47252	170.543	84.1015	155.413	4.86041	0.391626	-13.4329	-0.937672	-50.7551
18.7747	141.523	104.709	111.727	4.86341	0.388581	18.2647	-5.15818	-43.7988
14.7569	122.79	72.7624	111.45	4.85825	0.382744	13.3652	0.496682	57.3283
22.2673	165.457	105.391	102.812	4.85866	0.374519	49.2576	0.208915	-32.5932
4.89972	121.736	76.7607	95.5688	4.85407	0.362409	20.9292	1.731	-12.0128
16.5993	133.948	99.6362	142.343	4.85449	0.355827	15.3164	6.04235	18.4825
14.3065	149.698	72.8202	121.225	4.85343	0.373847	55.5484	2.92742	-59.5641
13.1479	131.757	61.3795	135.157	4.85783	0.357907	19.9171	-1.60597	-3.86054
18.6512	162.772	85.1791	90.7581	4.85602	0.415401	48.5449	-9.03391	-2.54464
5.23221	131.075	106.818	78.8101	4.85957	0.348981	35.6568	5.30665	16.8157
6.98336	134.018	93.4618	134.57	4.86444	0.389342	29.325	-1.8337	-20.5906
20.7533	135.623	98.2811	163.327	4.86094	0.362296	14.9063	-7.82455	15.3212
18.2799	133.738	61.8073	88.8456	4.86812	0.355702	2.48967	-0.248954	-73.6489
3.12538	135.3	71.197	104.404	4.86478	0.360703	-50.8825	-5.06473	-44.7686
12.8057	143.481	98.4184	108.021	4.86135	0.386873	4.50445	-5.50229	13.8572
17.3918	156.856	63.8545	111.713	4.85673	0.407199	-16.5871	-1.93202	-44.7308
19.2702	159.453	83.6025	124.002	4.86818	0.380033	101.741	7.61306	-5.99133
21.1055	141.445	77.1469	95.955	4.84869	0.394017	9.60361	-7.36935	18.54
12.5375	167.076	86.004	143.943	4.85885	0.355522	-42.7025	-16.2954	22.578
11.7016	156.907	72.2568	82.1049	4.85692	0.36523	32.6246	0.984651	-73.4432
17.0565	163.681	71.1847	118.897	4.86416	0.357476	-13.8894	-1.14872	55.9663
10.3987	134.832	75.1042	77.597	4.86219	0.359696	6.0585	4.34724	-50.6489
9.86098	173.252	90.4925	135.386	4.85469	0.39841	17.7856	-14.8741	65.031
15.033	124.296	72.8842	116.044	4.86017	0.364269	-28.9794	-10.7243	-24.2319
7.45067	156.76	66.7748	95.2182	4.85688	0.382799	-8.21901	-2.1329	6.51512
13.2154	147.334	67.8634	111.3	4.85882	0.382166	60.1774	-1.04391	-66.5152
9.62309	156.69	70.9055	101.333	4.8604	0.385179	-31.4578	-0.903045	-33.3131
13.6189	185.139	78.3666	133.213	4.86513	0.398065	11.1621	0.0339387	-92.7827
17.9363	153.616	81.2949	69.7047	4.86594	0.412817	18.6268	-12.5684	-56.4509
19.3263	136.635	85.4542	70.5234	4.85785	0.36477	-4.92729	1.42694	28.0157
11.0069	166.134	82.1552	137.89	4.86271	0.377947	-7.13307	-1.10337	-10.5284
19.0097	136.898	93.1419	146.866	4.86078	0.377233	18.1808	-2.2742	-60.2042
12.9574	121.179	58.1087	83.4482	4.86118	0.399902	22.4063	-3.58202	78.5246
23.7423	162.296	101.2	115.401	4.85749	0.364253	49.7457	5.94785	-28.9259
4.00308	116.369	70.4231	118.133	4.85304	0.340736	38.9701	3.7635	-47.2733
16.9111	142.45	92.83	106.308	4.8487	0.386219	-16.8284	10.7803	5.96918
12.9992	140.733	71.2963	127.351	4.85211	0.357411	19.3691	7.83005	-14.6524
7.14409	138.878	65.0882	129.902	4.85787	0.362804	40.3181	10.0906	24.8517
23.6369	155.491	75.9485	111.567	4.85396	0.4003	8.28519	-11.4343	1.37439
2.68609	157.726	101.091	140.287	4.86009	0.341806	-13.5701	-11.6079	13.4578
5.16746	143.922	84.3129	109.747	4.86064	0.372251	35.4914	-1.17209	-70.1238
24.7136	139.367	118.289	175.598	4.8638	0.357697	5.63159	-16.059	-8.09744
22.0705	160.229	71.6732	78.492	4.86313	0.364544	47.1589	11.9774	-48.0302
2.75794	129.618	75.6648	107.672	4.8645	0.356609	-26.6031	-7.73578	-54.9275
10.1827	153.115	112.341	123.237	4.86068	0.391936	16.6473	-5.34273	-23.7868
17.7553	153.546	70.607	115.211	4.85871	0.407038	-13.4508	2.19108	-4.14118
11.6286	146.59	108.617	110.66	4.86701	0.378936	82.7051	-1.31634	16.7815
22.4301	144.807	74.9672	110.121	4.85377	0.385755	-7.18065	1.25115	2.53595
9.62602	179.122	80.1051	146.054	4.8595	0.355773	-48.6198	-26.6575	62.371
11.5397	148.107	64.124	66.0107	4.85361	0.344404	74.8782	9.19484	-55.4468
16.7259	154.373	63.3778	113.806	4.86711	0.369956	28.1079	10.2769	1.74487
13.6622	144.278	89.7537	106.909	4.86387	0.373129	34.2895	-7.83613	4.52807
11.1904	186.865	76.7588	136.904	4.85271	0.386528	25.1012	-22.4486	34.0543
15.6569	127.051	61.0344	96.6244	4.86678	0.335607	-13.2807	-9.63128	-79.6218
8.79738	146.108	65.6783	84.8371	4.8551	0.376779	31.9908	-8.71444	-1.15399
14.9949	140.671	81.7276	125.986	4.86186	0.371103	65.3276	-3.35479	-63.3454
13.8394	172.939	72.496	79.1963	4.86128	0.38756	2.54353	7.85501	-18.6685
12.7875	168.673	79.8498	127.361	4.86667	0.372792	-1.15301	3.18355	-44.0839
10.8417	162.594	77.5063	54.6922	4.86309	0.409073	12.4095	-20.4028	-55.029
19.8557	172.574	88.9632	110.774	4.86614	0.340062	-10.8462	18.8913	98.8822
14.3757	178.007	66.0697	142.346	4.86159	0.363131	-34.9892	11.8938	4.67872
11.1094	143.204	84.7342	150.781	4.85759	0.381568	1.49278	-2.02492	-42.3163
15.9486	122.068	61.9247	99.0109	4.86103	0.383347	24.8842	0.939917	67.2649
17.0323	167.393	81.2437	109.05	4.85488	0.364285	1.42994	5.92619	3.09569
3.5615	137.521	61.2402	130.515	4.85753	0.353005	20.0205	-12.6765	-34.566
14.0592	151.584	97.6523	89.9431	4.85354	0.37843	8.60691	12.1782	-11.1973
17.9842	144.405	62.4429	144.195	4.85278	0.351282	34.0669	18.5613	-30.6462
13.2795	161.386	73.6097	128.096	4.85772	0.342072	2.28124	41.5106	40.8209
16.5417	141.59	75.1062	122.268	4.85902	0.385626	7.28025	-13.5662	18.5897
1.58801	141.825	98.6135	145.801	4.86213	0.360364	-9.83131	-23.4082	56.2445
8.02628	148.985	86.9357	102.342	4.86134	0.385259	62.5849	-7.80042	-36.1124
20.096	137.787	97.14	136.77	4.86253	0.360503	-12.0381	-7.34761	-4.9246
18.5223	167.936	69.6808	76.5608	4.86472	0.352708	56.5455	9.36696	-65.0839
7.68956	118.666	75.1013	116.498	4.8658	0.370543	-24.6543	-4.52071	-42.7475
9.96453	165.175	112.414	117.848	4.86292	0.397694	4.01371	7.04135	-61.5194
13.2355	157.431	71.3564	123.331	4.85892	0.39274	3.57908	-5.23963	-7.53892
8.40312	155.362	108.734	65.6742	4.87271	0.424062	124.414	30.8445	-27.5044
21.6722	133.586	73.7171	115.43	4.85898	0.358833	-14.9687	-0.25368	12.5535
8.08362	163.513	87.2751	138.034	4.86295	0.356275	-16.9794	-25.0531	28.0753
13.6927	132.396	73.3643	89.1289	4.85196	0.322719	28.1194	18.4337	27.7279
17.0143	147.32	73.1087	108.302	4.86896	0.374135	53.2206	7.70122	1.13224
12.1998	123.853	88.9427	108.811	4.86383	0.361462	59.4053	-4.36413	30.0059
5.60352	193.466	86.749	128.903	4.85937	0.401176	20.5073	-37.8688	11.6818
10.7709	134.209	59.6848	87.0164	4.86132	0.345448	7.74675	-10.1891	-60.4173
11.619	119.395	64.9324	107.692	4.85775	0.358058	44.974	7.37593	-42.755
15.9167	143.102	71.3654	165.051	4.86068	0.377256	25.1152	1.22108	-82.5268
11.8432	161.961	75.9831	97.5103	4.86231	0.396413	-31.968	-3.63538	-20.8447
13.1086	154.759	80.5795	98.2404	4.8628	0.390802	3.39293	-10.2725	-40.3251
12.266	158.015	69.3347	47.1836	4.85077	0.386165	-39.149	-9.41266	4.07069
13.0449	142.301	92.0117	121.617	4.86098	0.360593	31.3662	-29.153	4.98462
14.3172	166.649	99.3159	199.823	4.86251	0.34748	-41.5765	-23.6935	92.4759
12.2433	142.554	82.8159	161.439	4.85923	0.387389	4.4256	-6.08322	-52.2841
20.6161	166.136	64.7527	101.456	4.85718	0.386282	17.7664	16.695	49.6285
20.8162	234.081	92.4063	79.7016	4.85307	0.38002	25.7729	25.5225	-55.3096
3.71699	124.5	74.3323	149.644	4.85704	0.341986	74.5466	-45.0695	-60.069
19.1768	163.791	120.336	86.0101	4.85241	0.393956	36.7986	31.3658	13.8869
15.6519	137.536	61.6301	168.241	4.85401	0.32915	65.2254	15.238	-36.6029
9.36905	183.724	80.9457	105.679	4.8611	0.367121	-24.4292	39.1012	31.4394
14.689	146.042	71.357	74.8894	4.85957	0.407075	-15.7091	4.12136	-30.8271
7.01802	133.86	91.3931	68.5055	4.86226	0.371318	-38.5044	13.2953	-24.4687
6.93376	145.86	85.6057	81.7202	4.86165	0.392219	55.5845	-12.0909	-36.3415
25.5594	146.003	92.1066	115.907	4.85743	0.366395	-31.3158	-20.7158	5.642
17.7452	156.211	67.9947	75.0909	4.86594	0.365917	19.5201	-5.68079	-34.9778
11.3316	113.481	69.23	121.892	4.86346	0.346488	-52.0623	-8.64777	-19.5381
9.72036	158.261	102.377	122.587	4.86122	0.405225	-25.6443	10.0106	-96.1131
16.4766	149.941	66.9322	94.1877	4.8596	0.399695	19.4034	-3.45478	-30.9553
10.0912	141.953	118.492	93.5802	4.86924	0.411225	97.9108	23.8854	-22.2549
23.5631	136.624	84.1007	127.825	4.85707	0.360963	-26.7709	6.46506	28.3579
5.64288	153.413	79.8054	126.219	4.86309	0.350903	-34.0632	-22.1656	22.8988
13.0107	132.218	64.8923	108.303	4.85391	0.341116	39.3044	12.4191	-13.4721
12.5476	152.138	78.1422	114.288	4.86979	0.391905	34.3944	0.146916	18.954
15.1881	133.682	68.6844	143.509	4.85918	0.36411	25.6714	3.34402	33.776
5.26978	195.66	87.278	124.052	4.85329	0.396409	13.8142	-44.6965	-11.4019
15.3155	130.141	68.098	94.8954	4.86117	0.359964	-51.9099	-30.303	-28.083
7.65606	135.21	68.1264	105.321	4.85905	0.381165	33.0491	-2.82283	-68.8243
9.25442	144.083	80.7919	153.867	4.86367	0.389579	57.6753	-14.3101	-44.6861
10.6958	165.422	80.4888	95.62	4.86086	0.390744	-49.1745	3.92547	1.35257
11.9557	159.632	79.9595	104.588	4.86198	0.394459	9.42047	-15.495	-57.3077
12.9056	154.559	71.8863	61.8411	4.8608	0.39677	20.226	-10.8055	-35.9899
19.7988	152.467	69.7426	76.9109	4.85575	0.381722	57.8982	14.1703	-16.5575
8.06599	171.282	95.6844	133.271	4.85962	0.38198	-39.8996	-20.1894	36.1692
19.4169	156.807	84.7993	177.147	4.85117	0.374644	13.6333	27.6639	4.45084
15.3187	177.743	63.381	56.9822	4.8606	0.412005	-18.2565	0.61647	71.4191
20.2488	183.075	86.4932	107.837	4.85889	0.365608	13.7243	0.125962	-32.6451
14.2231	131.634	82.9643	160.002	4.85668	0.340684	20.2731	9.09105	-8.10106
18.8591	121.277	82.1731	105.603	4.8553	0.372986	99.1321	64.3736	21.4933
10.4118	149.502	76.3376	149.906	4.86041	0.358424	64.6481	17.8247	-60.9124
13.9002	134.781	73.351	73.6821	4.8649	0.340634	-21.7679	24.9714	-0.957969
12.9648	133.221	64.5228	59.7085	4.86104	0.411536	-3.62309	14.0833	-49.5177
7.55928	135.02	92.0207	65.2924	4.86324	0.37519	-30.6778	12.9456	-27.3992
1.89912	129.074	87.7901	86.0617	4.86884	0.363332	14.0351	-24.7487	-20.9969
19.9523	147.775	97.1388	114.546	4.86499	0.358093	-28.6622	-27.2752	-6.32695
21.3543	152.63	65.3415	81.6318	4.86577	0.369232	-34.6429	-11.575	-3.24029
15.053	135.487	81.3081	149.01	4.86133	0.348236	3.41334	-4.78162	-10.7791
13.3272	160.877	81.8864	121.636	4.86116	0.38935	-105.517	-21.6206	-52.5064
24.8741	161.796	64.7663	79.5135	4.85984	0.410159	2.84323	-2.06061	3.87786
11.1432	150.473	95.9819	83.731	4.87035	0.393449	47.4766	-1.07022	-30.4954
20.8324	142.343	71.2445	146.29	4.85472	0.373282	-26.2788	13.4294	11.4144
5.97799	152.012	78.9598	85.045	4.86456	0.364329	-20.8939	-26.6492	-1.55841
10.2765	144.303	68.7159	81.2889	4.85599	0.362986	17.386	3.1932	-33.5055
11.5606	142.006	94.5768	118.584	4.86971	0.389205	6.01378	3.32145	-12.7585
17.4571	144.546	63.6991	127.743	4.85729	0.378817	14.2581	-11.4929	60.9919
8.06741	179.166	106.243	155.713	4.85669	0.383999	64.6532	-10.4723	-18.2594
16.5788	139.967	74.9899	101.116	4.85811	0.375705	-44.3458	-26.2192	-28.7617
6.41906	128.341	81.6378	136.758	4.86265	0.367433	51.1976	-13.1709	-35.1487
9.33355	152.806	66.573	135.335	4.8603	0.388074	25.5549	-9.34724	-34.1548
13.5288	165.089	81.7768	115.311	4.8594	0.394513	-51.7998	10.634	2.99461
16.7747	149.075	77.9706	94.2337	4.86131	0.389218	4.45165	-2.13124	-118.991
10.7998	141.132	74.0739	61.0289	4.86283	0.372404	27.0549	-29.7547	-62.0645
21.7131	157.334	68.7252	74.937	4.85482	0.382107	63.6905	17.5773	-15.2855
7.72111	176.652	100.655	158.13	4.86284	0.385771	-71.904	-27.0132	55.5184
17.6319	155.572	84.9015	141.134	4.85306	0.387997	6.67866	-26.2578	-16.6588
15.0417	192.983	78.2631	76.3477	4.86063	0.388175	-28.3446	2.58526	60.3646
18.3748	192.291	90.2319	116.028	4.8574	0.354656	2.67447	-4.41151	11.7458
12.0294	140.019	75.3854	129.802	4.86344	0.319811	66.2011	11.609	-41.8761
18.3224	143.985	80.6108	104.746	4.85909	0.389709	64.958	30.2936	-0.411969
6.85888	145.223	82.2299	151.286	4.85848	0.36236	30.6066	10.5636	-17.2986
13.4657	131.568	72.0935	59.6974	4.86139	0.357383	-4.98527	30.8788	43.1748
9.92318	140.161	62.6259	70.4047	4.85999	0.404379	1.49682	7.38777	2.3859
4.80239	125.992	106.645	76.7319	4.87345	0.360742	16.5686	14.2909	-46.9216
3.91409	126.887	81.007	91.1487	4.86653	0.362625	29.1375	-36.9174	-26.8982
18.828	148.404	114.317	138.412	4.86634	0.357244	-5.88134	-50.5421	-50.4562
16.4923	153.932	94.2058	117.925	4.871	0.379292	36.6106	-17.9123	-2.83822
10.7451	137.053	84.4989	165.128	4.85917	0.358207	-43.7132	18.9452	32.3587
10.7346	166.913	83.0035	134.151	4.86448	0.376101	-81.2151	-18.881	-94.2877
21.7657	145.984	72.7829	67.9935	4.86174	0.392626	8.70237	1.00292	-3.58059
15.0252	158.076	83.7984	98.802	4.87457	0.382422	41.8493	12.7438	-49.2313
20.5413	143.331	70.9555	149.293	4.8539	0.368698	-21.1348	12.3022	28.3092
2.14571	179.207	80.616	108.165	4.86657	0.384098	-31.3286	-26.3192	-55.2871
3.0477	132.304	66.8488	105.888	4.85738	0.333724	-64.4036	3.28079	-36.787
12.1113	136.31	100.424	108.611	4.87195	0.39029	-0.390128	6.17174	-8.38923
18.8848	151.501	77.1852	128.098	4.85737	0.376266	10.5765	-4.36815	79.898
4.75752	162.276	100.341	134.024	4.85922	0.385288	56.7625	-13.4933	-30.5445
9.60843	140.66	74.842	96.4456	4.85658	0.357667	-51.482	-20.3667	-33.4791
5.43014	126.598	87.9963	108.458	4.86705	0.382862	47.9941	-15.851	-41.8317
10.9802	167.43	76.4622	134.707	4.85948	0.386968	46.1914	-1.33578	-27.0658
13.7027	163.827	92.6599	127.862	4.85833	0.371776	-77.4631	24.753	42.9705
11.6388	129.45	70.6836	70.128	4.86187	0.425232	7.26669	18.827	-111.704
12.8149	161.931	67.8306	78.6376	4.85556	0.365558	-1.57778	-21.08	55.4909
22.8718	158.02	75.5604	70.8246	4.85316	0.377089	35.2814	24.0359	9.83154
15.4584	177.909	99.9512	130.95	4.86319	0.378784	-14.8998	-29.4735	-2.27428
13.6015	158.999	76.915	72.9582	4.85402	0.407158	15.7535	-12.5594	-55.3641
12.5965	180.138	76.5665	80.3194	4.86068	0.386889	-25.6076	2.55313	63.2732
14.7071	202.544	93.597	102.34	4.86132	0.394385	-55.5385	-4.13837	52.4548
17.3618	138.9	75.0586	126.25	4.86132	0.323474	34.3871	15.1734	-30.5019
18.5406	130.531	90.1904	83.0085	4.86004	0.377307	17.4544	66.0352	-26.511
4.90693	136.838	101.15	165.659	4.8629	0.353875	2.11068	-14.834	-34.9574
15.5834	146.175	99.4728	85.5055	4.86775	0.384159	-47.6458	20.7345	65.314
9.85714	138.617	58.6214	47.2458	4.863	0.413937	15.9512	9.02658	18.8805
12.058	134.079	92.9152	118.429	4.86526	0.368016	-8.59169	3.90767	8.34835
15.9247	138.631	84.0583	113.053	4.86008	0.350705	23.4223	-9.74269	19.0943
19.117	142.47	81.2005	92.8475	4.86194	0.356981	26.1658	-28.5457	-47.7932
18.1445	151.627	70.6657	80.1643	4.86654	0.382846	81.1307	-14.5613	-28.1165
22.1155	123.359	78.3628	150.434	4.85675	0.365941	-1.99189	24.6212	-13.6604
13.8171	174.033	96.1278	178.216	4.86779	0.372713	0.460999	-65.8043	-77.1709
20.9866	144.679	79.2158	96.0683	4.8608	0.374585	-15.1861	16.6357	-14.218
14.7639	147.506	84.7312	102.987	4.87515	0.377409	47.4356	24.2367	-31.7744
15.6644	147.144	78.6862	137.714	4.86022	0.380484	-23.3795	-9.31009	12.4637
19.4781	190.488	72.7571	101.396	4.86415	0.375451	-40.7095	-15.9339	-62.7112
11.0155	146.35	73.0178	115.156	4.85451	0.362621	-33.1617	-5.8246	38.2245
12.179	122.447	98.141	104.274	4.87137	0.345677	-1.49128	-3.59139	-15.7115
21.2117	147.204	67.8059	146.13	4.85788	0.376531	76.8232	-12.3724	48.9294
12.9166	182.455	101.035	128.578	4.85162	0.387858	15.5646	17.994	-21.2005
12.7916	138.437	73.7175	97.6939	4.86032	0.359746	-46.154	-0.876249	-44.8137
6.41592	142.01	102.87	110.372	4.85865	0.369904	19.2322	-2.8198	9.42292
12.7046	154.686	76.4171	125.645	4.86294	0.379536	65.2157	-3.33101	-38.2764
15.7216	133.967	87.9648	141.042	4.8616	0.349024	-36.7833	31.8843	-33.244
16.4178	139.304	81.6969	118.556	4.86462	0.392688	-4.29314	6.06556	-155.434
3.96222	161.525	66.8257	98.4591	4.85144	0.351366	0.054676	-42.158	5.81219
18.5055	159.271	70.5136	73.942	4.859	0.370119	21.1097	12.3081	10.4689
17.1319	194.202	106.088	150.389	4.85857	0.400257	49.6782	-39.8759	-40.7168
11.9413	143.181	77.8995	92.0634	4.85474	0.391416	24.5803	-15.4105	-73.2381
7.98455	163.692	81.0672	97.1002	4.87154	0.369192	15.8992	-4.42409	48.0974
18.9647	176.089	92.012	131.775	4.85829	0.369855	-58.1601	19.6406	-11.2151
17.4948	156.25	62.7722	109.351	4.86059	0.336882	30.6513	10.1944	-60.4969
18.7258	130.07	95.3644	89.7187	4.85772	0.366116	6.20425	48.0568	-46.1074
9.10285	147.727	91.2463	143.861	4.8609	0.352278	15.9107	-11.5669	-12.8686
12.131	140.591	102.016	134.772	4.86582	0.383417	-39.4104	-24.5451	48.907
9.28853	146.86	68.2958	72.3344	4.86115	0.402961	8.98393	3.10364	6.90315
16.1875	140.514	89.3517	64.2183	4.86391	0.379493	-25.8116	6.63359	33.1171
20.6333	143.576	81.0809	158.82	4.85799	0.361218	30.5673	-6.70064	25.7331
15.6765	137.925	81.2925	83.6604	4.86145	0.363992	21.3576	-26.9192	-49.2185
18.6163	137.544	77.3816	101.392	4.86271	0.372343	60.3795	-4.10064	-23.5325
21.5928	130.429	77.4513	149.194	4.85573	0.360035	11.1498	21.254	-4.73741
17.1544	170.044	87.6495	137.89	4.86701	0.3805	-10.5778	-37.715	-62.9965
26.2844	158.218	73.0551	101.488	4.86157	0.382277	-44.8166	-11.1948	12.7727
17.5586	146.351	93.3333	119.101	4.87367	0.356605	20.4402	17.8707	-38.8768
25.3439	155.041	67.1498	135.917	4.86241	0.371018	0.346193	-28.2603	-38.9321
22.8315	195.546	78.3649	126.997	4.86228	0.364198	-27.5164	-15.9564	-63.4731
13.7935	157.867	58.4555	81.6927	4.85816	0.352652	-13.7544	-8.40753	-21.3407
5.66424	121.933	95.9021	92.4395	4.86889	0.348693	-18.735	-9.36028	31.5344
15.2698	152.382	76.7438	145.886	4.85731	0.382142	62.2773	2.83286	25.7877
11.6117	162.586	86.2994	134.469	4.8573	0.38666	28.4299	31.2479	5.49975
8.82375	143.76	80.4106	74.5878	4.86204	0.348564	-26.9871	11.9841	-90.2473
9.11854	143.423	98.9966	127.854	4.85452	0.364504	39.7024	-6.35023	14.8929
15.372	154.669	78.5232	131.89	4.85908	0.390281	54.0102	-3.28698	-68.9319
12.5588	120.833	68.8271	118.775	4.86317	0.334245	19.4381	-4.38049	-23.5775
8.94636	123.961	75.0515	99.563	4.87067	0.371141	-23.1789	-9.66768	-79.4716
7.66087	152.095	72.5354	110.754	4.85421	0.341231	9.69858	-44.1454	5.05639
14.0079	158.968	75.6048	97.2756	4.85836	0.37007	22.4466	22.6177	19.6979
14.1041	187.387	133.276	129.212	4.85913	0.384674	10.9709	-72.8994	-29.4045
12.9139	153.909	99.076	99.0802	4.85256	0.383031	23.3645	-2.56804	-94.7228
9.2597	148.858	82.079	109.547	4.86905	0.368319	36.6092	-1.30296	52.6578
22.031	173.703	91.9252	134.104	4.86056	0.370736	-34.7386	21.6904	-21.0425
20.4416	167.526	80.4291	111.065	4.85647	0.379069	18.9228	20.9447	-12.1987
9.74422	129.803	78.1814	68.4477	4.85552	0.376282	46.5488	8.55661	-52.4689
16.4846	149.423	77.3091	146.482	4.86168	0.353041	30.4139	-23.896	47.9581
12.5007	144.358	107.554	134.489	4.86305	0.383515	-44.8591	-5.04976	64.8528
13.4279	172.293	68.2714	110.224	4.85472	0.401412	4.48949	-18.6108	-35.2461
15.0434	142.394	86.095	77.8099	4.8675	0.365007	-32.1408	-1.21497	2.4591
22.709	131.56	72.6343	113.799	4.86443	0.329279	33.7073	-22.6069	-15.7123
12.1849	136.653	94.8482	82.245	4.8704	0.359997	26.174	-24.3651	-61.3664
18.965	134.196	74.8831	89.7267	4.86253	0.36923	64.3348	19.0234	-17.1374
15.5261	123.628	77.3867	135.425	4.85717	0.35428	3.94986	4.78706	6.97599
17.9648	185.446	86.5997	162.504	4.86232	0.387329	9.95967	-75.1095	-86.7624
30.2485	154.84	77.9338	106.953	4.86114	0.380187	-53.0818	-0.743077	10.3448
18.948	164.905	91.3653	122.228	4.86462	0.381768	15.9085	29.8957	11.1223
20.929	149.225	68.0087	116.025	4.85779	0.373707	46.4648	11.39	-35.8086
21.7882	193.566	89.7942	136.521	4.86252	0.365437	-27.895	-4.43405	-50.3259
13.7818	170.428	64.9131	93.7042	4.85987	0.352407	-12.5965	-24.6809	-31.706
11.076	141.194	90.4664	107.122	4.86297	0.363457	7.29773	-6.25832	-19.891
10.4698	142.345	83.2412	113.628	4.86419	0.387622	48.7705	-56.1608	21.5632
2.01137	148.993	85.9082	125.464	4.85623	0.379471	20.7599	48.3984	29.6353
10.0135	145.01	95.1112	110.919	4.86016	0.368035	20.8893	10.4864	-34.1
11.7063	162.357	97.6732	132.373	4.85557	0.397388	51.4559	-22.2281	22.8872
9.65623	136.112	71.8223	117.38	4.86359	0.372042	35.2497	-24.3406	-60.1572
14.0447	127.005	62.8484	106.13	4.86575	0.328515	-0.751632	1.76976	-25.9272
3.32499	123.838	108.771	141.466	4.86536	0.367152	-14.3155	-4.64253	-63.4619
12.8172	139.137	90.9765	114.53	4.86201	0.367494	36.1549	-46.6608	-47.7532
8.52676	161.891	101.371	119.883	4.86089	0.376318	-1.7865	33.3072	30.3459
5.95124	147.256	124.095	112.009	4.86179	0.382818	21.615	-74.8952	-55.5798
17.6837	160.449	97.1341	89.8596	4.85533	0.364805	50.3735	26.8728	-148.98
11.9686	154.733	75.1225	103.612	4.86504	0.380768	30.7526	15.2562	43.8251
24.7022	171.535	107.873	186.785	4.86052	0.380388	-30.1028	27.5418	-11.5377
16.5918	180.117	92.2626	133.851	4.84726	0.400583	52.6542	49.3278	-30.793
14.9327	132.237	63.3919	64.5941	4.85086	0.382498	34.1867	45.1571	-44.2905
15.7194	146.535	74.683	131.109	4.86281	0.352991	12.2565	-26.0523	35.417
9.42695	137.968	89.2125	93.3842	4.85849	0.376386	-37.7059	-10.0063	-2.34379
6.28681	155.566	86.4662	96.5778	4.85513	0.406446	2.12703	-22.2756	-7.85541
13.5129	137.592	82.2282	81.8461	4.86679	0.358449	-29.8202	-10.4749	5.828
13.9517	137.103	72.3733	97.1492	4.8612	0.36516	21.8761	-18.8069	25.225
13.8317	143.768	132.409	138.58	4.86547	0.36912	4.37517	-8.99215	-87.7458
18.4231	120.21	69.4417	89.9892	4.86201	0.360552	70.9865	7.42667	-15.2244
10.3039	124.249	86.3938	143.432	4.85626	0.358054	-3.97298	-8.54322	19.8257
21.5592	170.55	89.0683	148.883	4.85938	0.376965	11.5555	-40.0048	-77.783
12.7399	116.054	94.294	120.045	4.85747	0.370287	-3.99664	-19.6161	6.2567
10.1077	128.401	97.452	109.699	4.86831	0.367718	8.54267	-20.6707	-22.9177
22.2906	144.249	65.5874	125.253	4.85618	0.375182	58.5706	14.8608	-37.4461
21.0889	185.397	99.0339	125.987	4.86392	0.367408	-21.3294	13.6544	-55.6863
13.4654	176.999	67.3282	99.9177	4.85396	0.363565	11.4575	-4.39629	-45.6723
10.4735	135.163	99.0934	94.4325	4.86294	0.370901	37.3855	-15.4619	60.4155
17.5888	142.294	81.843	105.86	4.87002	0.375431	47.3231	-45.0538	22.6498
2.29407	129.623	81.6799	121.62	4.85838	0.362793	10.1737	20.3873	-13.7305
4.91982	152.435	114.206	148.103	4.85489	0.387362	66.0803	48.5208	-30.3882
13.919	151.327	107.344	151.687	4.85432	0.380592	34.1845	-54.4328	55.8325
6.96487	138.781	75.8348	142.549	4.86645	0.36422	15.0323	-38.0251	-23.6654
10.3429	123.7	64.6032	100.717	4.86492	0.31618	-14.6638	-2.52858	-76.1856
6.39325	122.547	111.725	119.382	4.86233	0.372439	10.2455	26.4815	-72.9971
7.99292	132.351	95.6524	126.337	4.86109	0.364715	23.3681	-54.1238	-61.2375
19.8629	158.469	73.3999	113.445	4.86124	0.366764	42.3394	14.3547	11.7104
2.57207	138.875	136.321	91.9657	4.85917	0.388194	36.923	-42.075	-66.5544
18.4345	148.089	81.2634	105.564	4.8609	0.348395	62.0155	7.62796	-90.0525
15.5385	149.938	68.4391	104.586	4.86358	0.371361	22.4846	22.1124	21.8888
29.2319	149.78	90.5191	118.127	4.85691	0.35745	-16.524	27.4039	-69.4411
7.93251	169.189	93.3662	128.111	4.85462	0.390833	-0.703513	4.62578	-48.6283
17.3986	136.207	76.1224	70.9712	4.85529	0.380223	21.3074	42.573	-28.2444
22.9336	147.692	80.6393	126.604	4.86601	0.33059	22.9884	-3.83739	11.5815
12.2647	136.009	77.2139	94.9724	4.85782	0.36321	-48.4369	-15.6841	-14.0381
8.32292	152.4	83.1406	91.9948	4.8558	0.397118	7.36072	-14.3661	11.2038
10.2453	138.124	82.2324	79.9423	4.86996	0.353728	-25.6782	-25.4889	-23.8634
17.6716	143.591	61.822	74.186	4.86206	0.369266	17.8957	-6.02324	73.7775
17.1423	137.851	122.928	145.561	4.86392	0.366733	-25.5471	17.0792	-76.9304
19.4823	145.42	85.5096	100.12	4.86547	0.374704	25.5053	9.32023	26.5058
20.6635	137.344	64.2958	135.643	4.8631	0.348785	17.0988	-18.6263	9.00238
15.0715	154.443	93.7953	132.541	4.85837	0.382813	4.53833	-11.1923	-47.9721
16.5165	119.914	83.9267	118.818	4.85271	0.374362	-1.31147	2.55392	10.1227
13.3582	132.989	123.964	118.567	4.86272	0.370047	15.4935	-78.9915	-20.3218
21.0063	159.709	63.2729	105.256	4.86362	0.369144	103.416	13.7793	-16.6346
9.47408	159.725	120.957	165.377	4.8654	0.399103	-51.518	-67.1605	-7.62608
17.88	194.132	74.3069	115.167	4.85554	0.33788	-2.54741	10.5401	-71.8034
16.2682	158.263	88.6606	83.8041	4.86295	0.349947	14.6126	-16.778	-1.99125
9.60291	160.293	101.404	140.078	4.85868	0.377117	84.3243	9.01177	-22.227
6.82833	140.137	67.6343	121.447	4.85805	0.369063	36.3924	19.5967	-20.3691
10.2803	158.776	103.191	141.057	4.85688	0.348178	28.03	43.4273	-51.4775
19.1122	157.512	103.805	184.929	4.85261	0.378266	32.6192	-48.3903	60.6599
7.27246	130.16	73.5584	144.115	4.86153	0.361119	19.9613	-9.56834	-36.0891
8.14139	123.486	67.3831	109.666	4.86279	0.331829	-25.9852	6.53717	-56.2901
9.49704	130.862	95.442	104.138	4.85659	0.377806	-6.3843	24.4288	-24.815
11.4857	144.178	88.8135	111.891	4.8596	0.375509	32.6256	-36.4977	-32.2058
20.1206	151.135	74.9798	131.566	4.86301	0.358663	56.2127	5.68747	22.7867
8.75481	133.826	107.74	87.3508	4.85759	0.37017	54.0948	-16.7394	-47.2888
18.0769	149.692	74.5629	96.4218	4.863	0.362309	73.3798	-2.80598	-25.5138
10.7801	146.735	74.6401	122.564	4.86814	0.402779	21.4065	27.5171	66.3068
18.4555	122.731	93.2338	97.4549	4.86566	0.39333	4.74867	80.2397	-47.3654
7.55836	168.878	82.0262	122.612	4.8558	0.397201	-26.1453	5.30555	-64.6004
16.6888	130.474	88.7131	76.1925	4.85659	0.363681	30.3491	16.6537	-32.5276
25.3629	132.388	95.2418	107.736	4.8653	0.344331	69.1177	-48.6196	-26.9524
11.245	143.905	66.6856	95.3364	4.85729	0.35317	-45.3476	-24.2567	-1.20243
11.0537	147.233	68.8048	87.2486	4.85491	0.389722	-9.02911	-33.8541	21.2056
16.0306	139.287	85.4584	98.5494	4.86935	0.353601	-20.6127	-12.0835	34.4792
17.2855	147.295	69.3017	88.2891	4.86177	0.368495	43.0045	-9.50562	36.1299
22.0394	145.736	108.169	119.699	4.86438	0.376534	-2.15857	-0.600256	11.2179
18.5675	142.467	74.5987	135.712	4.86612	0.367701	35.3257	-26.0234	-15.0108
24.0681	150.672	62.8529	133.382	4.85658	0.360173	49.7672	-12.7822	43.2454
13.0161	147.447	96.5066	136.81	4.8571	0.399269	2.42176	-15.5419	-50.3984
17.9655	118.038	49.7811	82.4276	4.85367	0.359535	6.44463	0.225665	-9.10788
14.6586	139.202	126.063	131.552	4.86487	0.364535	34.1781	-79.2217	-67.7922
21.3899	156.378	64.8917	107.868	4.86338	0.358934	50.6197	-4.44748	6.18241
15.9246	161.637	103.93	153.841	4.86376	0.387077	20.8635	-68.1656	-14.9024
13.7833	170.716	91.2415	119.906	4.85945	0.363597	-19.7828	-0.670321	-64.5221
11.6936	167.909	88.5119	56.7296	4.8581	0.347072	-2.73657	-9.6472	-47.7377
13.2267	158.26	109.298	146.133	4.86174	0.367709	112.9	13.8477	-19.7396
6.32397	148.863	72.7528	133.04	4.85332	0.356207	-3.27518	4.84123	4.43363
4.8919	156.972	74.4461	114.195	4.8568	0.325452	20.3662	55.206	-34.8834
19.5219	164.489	84.8089	161.82	4.85855	0.350162	13.5237	4.567	108.527
15.6513	137.027	79.545	121.252	4.8637	0.344807	38.9906	-15.2464	-49.0512
12.0368	131.796	74.527	106.375	4.86032	0.357545	-7.27472	0.502139	-44.9692
9.46066	143.509	106.382	122.149	4.8527	0.36679	47.1648	68.7308	-47.4455
13.821	152.669	76.4555	117.408	4.86153	0.369343	40.1809	-43.387	-19.9245
16.925	171.329	84.8307	138.472	4.85852	0.386487	32.0156	-14.3802	-2.17598
4.2432	140.594	107.532	93.4196	4.85836	0.383095	48.5103	-31.7831	-57.3724
15.6845	146.753	74.0351	89.138	4.86185	0.361213	54.8105	3.73203	-65.4703
7.69425	153.873	87.395	114.21	4.86379	0.398058	5.18188	21.6693	42.3244
12.4971	135.677	98.5653	124.097	4.8637	0.393969	-3.86704	-6.76517	-75.59
13.328	175.59	82.0194	103.205	4.85701	0.386502	-24.8784	0.0522859	-59.3941
18.6135	122.015	87.9477	95.7775	4.8584	0.369957	14.9206	0.788014	-17.9247
20.3114	135.135	106.305	136.98	4.86246	0.371587	45.0189	-55.6477	-60.6365
13.4124	157.503	65.6757	126.488	4.8589	0.337457	-37.3369	-1.85336	5.08155
12.6491	143.235	88.785	104.371	4.85932	0.379146	-6.24775	-37.0663	-20.9138
19.679	139.874	111.609	115.514	4.86694	0.346271	27.1528	-7.0632	3.96107
17.5029	134.788	72.8274	89.6043	4.86396	0.370014	41.5238	-0.516348	16.8045
13.9854	129.676	64.8347	76.1025	4.85918	0.370754	-65.2414	14.3718	-32.753
18.0868	141.897	71.0159	146.561	4.86333	0.369966	36.711	-23.1151	-33.3502
16.126	155.668	69.7578	123.528	4.85834	0.371244	20.8677	-0.597626	-5.39802
13.3756	138.213	111.873	170.986	4.85787	0.39271	31.116	-5.4523	-70.7779
18.0064	135.013	62.163	70.0297	4.86145	0.358503	13.1663	2.97886	1.84285
15.2047	147.879	123.765	127.343	4.86333	0.357198	24.416	-37.1128	-44.5214
18.626	137.683	72.5083	143.221	4.86344	0.368691	17.4313	-16.5445	-9.3703
15.9699	158.588	112.869	134.394	4.86325	0.377438	77.039	-13.0085	-15.5749
12.9143	179.34	88.4066	128.436	4.85838	0.363392	-48.6987	3.17357	-83.3833
13.8087	145.641	84.0968	88.3279	4.85955	0.360928	11.7986	-11.3488	-39.4522
22.912	182.134	94.0266	133.186	4.85777	0.370998	123.211	3.94353	25.1145
[truncated: 50,353 more rows]
