# Supplementary material for: A planet within the debris disk around the pre-main-sequence star AU Microscopii
Source: Springer Nature journal article supplement (doi:10.1038/s41586-020-2400-z), 2020-06-24
Supplement: MOESM12 [file 41586_2020_2400_MOESM12_ESM.xlsx]

## Sheet: Data
Wavelength (nm)	Photometric variability amplitude (mag)	Bandpass (nm)	Photometric variability uncertainty
452	0.051	10	1
549.7	0.047	12	1
656.3	0.035	7.5	1
660	0.039	7.5	1

## Sheet: Model
wavelength (nm)	photometric variability amplitude model (mag)
400	0.0605
422.723	0.0572479
445.445	0.0543276
468.168	0.0516908
490.891	0.0492981
513.614	0.0471171
536.336	0.0451209
559.059	0.043287
581.782	0.0415964
604.505	0.0400328
627.227	0.0385825
649.95	0.0372336
672.673	0.0359759
695.395	0.0348003
718.118	0.0336992
740.841	0.0326656
763.564	0.0316935
786.286	0.0307776
809.009	0.0299131
831.732	0.0290959
854.454	0.0283222
877.177	0.0275885
899.9	0.0268919
922.623	0.0262296
945.345	0.0255991
968.068	0.0249982
990.791	0.0244249
1013.51	0.0238773
1036.24	0.0233537
1058.96	0.0228526
1081.68	0.0223726
1104.4	0.0219123
1127.13	0.0214705
1149.85	0.0210462
1172.57	0.0206384
1195.3	0.020246
1218.02	0.0198683
1240.74	0.0195045
1263.46	0.0191537
1286.19	0.0188153
1308.91	0.0184887
1331.63	0.0181732
1354.35	0.0178683
1377.08	0.0175735
1399.8	0.0172882
1422.52	0.017012
1445.25	0.0167446
1467.97	0.0164854
1490.69	0.0162341
1513.41	0.0159903
1536.14	0.0157538
1558.86	0.0155242
1581.58	0.0153011
1604.3	0.0150844
1627.03	0.0148738
1649.75	0.0146689
1672.47	0.0144696
1695.2	0.0142756
1717.92	0.0140868
1740.64	0.0139029
1763.36	0.0137238
1786.09	0.0135492
1808.81	0.013379
1831.53	0.013213
1854.25	0.0130511
1876.98	0.0128931
1899.7	0.0127389
1922.42	0.0125883
1945.15	0.0124412
1967.87	0.0122976
1990.59	0.0121572
2013.31	0.01202
2036.04	0.0118858
2058.76	0.0117547
2081.48	0.0116263
2104.2	0.0115008
2126.93	0.0113779
2149.65	0.0112576
2172.37	0.0111399
2195.1	0.0110246
2217.82	0.0109116
2240.54	0.010801
2263.26	0.0106925
2285.99	0.0105862
2308.71	0.010482
2331.43	0.0103799
2354.15	0.0102797
2376.88	0.0101814
2399.6	0.010085
2422.32	0.00999041
2445.05	0.00989757
2467.77	0.00980643
2490.49	0.00971696
2513.21	0.00962911
2535.94	0.00954283
2558.66	0.00945808
2581.38	0.00937483
2604.1	0.00929302
2626.83	0.00921264
2649.55	0.00913363
2672.27	0.00905596
2694.99	0.00897961
2717.72	0.00890453
2740.44	0.0088307
2763.16	0.00875808
2785.89	0.00868664
2808.61	0.00861637
2831.33	0.00854722
2854.05	0.00847917
2876.78	0.00841219
2899.5	0.00834627
2922.22	0.00828137
2944.94	0.00821747
2967.67	0.00815455
2990.39	0.00809259
3013.11	0.00803156
3035.84	0.00797145
3058.56	0.00791222
3081.28	0.00785388
3104	0.00779638
3126.73	0.00773972
3149.45	0.00768388
3172.17	0.00762884
3194.89	0.00757458
3217.62	0.00752109
3240.34	0.00746835
3263.06	0.00741634
3285.79	0.00736506
3308.51	0.00731447
3331.23	0.00726458
3353.95	0.00721536
3376.68	0.00716681
3399.4	0.0071189
3422.12	0.00707164
3444.84	0.00702499
3467.57	0.00697896
3490.29	0.00693352
3513.01	0.00688867
3535.74	0.0068444
3558.46	0.0068007
3581.18	0.00675755
3603.9	0.00671494
3626.63	0.00667287
3649.35	0.00663132
3672.07	0.00659028
3694.79	0.00654975
3717.52	0.00650972
3740.24	0.00647017
3762.96	0.0064311
3785.69	0.0063925
3808.41	0.00635436
3831.13	0.00631667
3853.85	0.00627943
3876.58	0.00624262
3899.3	0.00620624
3922.02	0.00617029
3944.74	0.00613474
3967.47	0.00609961
3990.19	0.00606487
4012.91	0.00603053
4035.64	0.00599658
4058.36	0.005963
4081.08	0.0059298
4103.8	0.00589697
4126.53	0.0058645
4149.25	0.00583238
4171.97	0.00580061
4194.69	0.00576919
4217.42	0.00573811
4240.14	0.00570736
4262.86	0.00567694
4285.59	0.00564684
4308.31	0.00561705
4331.03	0.00558758
4353.75	0.00555842
4376.48	0.00552956
4399.2	0.005501
4421.92	0.00547273
4444.64	0.00544475
4467.37	0.00541706
4490.09	0.00538965
4512.81	0.00536251
4535.54	0.00533564
4558.26	0.00530905
4580.98	0.00528271
4603.7	0.00525664
4626.43	0.00523082
4649.15	0.00520525
4671.87	0.00517994
4694.59	0.00515486
4717.32	0.00513003
4740.04	0.00510544
4762.76	0.00508108
4785.49	0.00505696
4808.21	0.00503306
4830.93	0.00500939
4853.65	0.00498593
4876.38	0.0049627
4899.1	0.00493968
4921.82	0.00491688
4944.54	0.00489428
4967.27	0.00487189
4989.99	0.00484971
5012.71	0.00482773
5035.44	0.00480594
5058.16	0.00478435
5080.88	0.00476295
5103.6	0.00474175
5126.33	0.00472073
5149.05	0.0046999
5171.77	0.00467925
5194.49	0.00465878
5217.22	0.00463849
5239.94	0.00461837
5262.66	0.00459843
5285.39	0.00457866
5308.11	0.00455906
5330.83	0.00453963
5353.55	0.00452036
5376.28	0.00450126
5399	0.00448231
5421.72	0.00446353
5444.44	0.0044449
5467.17	0.00442642
5489.89	0.0044081
5512.61	0.00438993
5535.34	0.00437191
5558.06	0.00435404
5580.78	0.00433631
5603.5	0.00431873
5626.23	0.00430128
5648.95	0.00428398
5671.67	0.00426682
5694.39	0.00424979
5717.12	0.0042329
5739.84	0.00421615
5762.56	0.00419952
5785.29	0.00418303
5808.01	0.00416666
5830.73	0.00415042
5853.45	0.00413431
5876.18	0.00411832
5898.9	0.00410246
5921.62	0.00408672
5944.34	0.0040711
5967.07	0.00405559
5989.79	0.00404021
6012.51	0.00402494
6035.24	0.00400979
6057.96	0.00399475
6080.68	0.00397982
6103.4	0.003965
6126.13	0.00395029
6148.85	0.0039357
6171.57	0.00392121
6194.29	0.00390682
6217.02	0.00389254
6239.74	0.00387837
6262.46	0.00386429
6285.19	0.00385032
6307.91	0.00383645
6330.63	0.00382268
6353.35	0.00380901
6376.08	0.00379544
6398.8	0.00378196
6421.52	0.00376858
6444.24	0.00375529
6466.97	0.00374209
6489.69	0.00372899
6512.41	0.00371598
6535.14	0.00370306
6557.86	0.00369023
6580.58	0.00367749
6603.3	0.00366483
6626.03	0.00365226
6648.75	0.00363978
6671.47	0.00362739
6694.19	0.00361507
6716.92	0.00360284
6739.64	0.0035907
6762.36	0.00357863
6785.09	0.00356665
6807.81	0.00355474
6830.53	0.00354292
6853.25	0.00353117
6875.98	0.0035195
6898.7	0.00350791
6921.42	0.00349639
6944.14	0.00348495
6966.87	0.00347358
6989.59	0.00346229
7012.31	0.00345107
7035.04	0.00343993
7057.76	0.00342885
7080.48	0.00341785
7103.2	0.00340691
7125.93	0.00339605
7148.65	0.00338526
7171.37	0.00337453
7194.09	0.00336387
7216.82	0.00335328
7239.54	0.00334275
7262.26	0.00333229
7284.98	0.0033219
7307.71	0.00331157
7330.43	0.00330131
7353.15	0.00329111
7375.88	0.00328097
7398.6	0.00327089
7421.32	0.00326087
7444.04	0.00325092
7466.77	0.00324103
7489.49	0.00323119
7512.21	0.00322142
7534.93	0.00321171
7557.66	0.00320205
7580.38	0.00319245
7603.1	0.00318291
7625.83	0.00317343
7648.55	0.003164
7671.27	0.00315463
7693.99	0.00314531
7716.72	0.00313605
7739.44	0.00312684
7762.16	0.00311769
7784.88	0.00310859
7807.61	0.00309954
7830.33	0.00309055
7853.05	0.0030816
7875.78	0.00307271
7898.5	0.00306387
7921.22	0.00305508
7943.94	0.00304635
7966.67	0.00303766
7989.39	0.00302902
8012.11	0.00302043
8034.83	0.00301189
8057.56	0.00300339
8080.28	0.00299495
8103	0.00298655
8125.73	0.0029782
8148.45	0.00296989
8171.17	0.00296163
8193.89	0.00295342
8216.62	0.00294525
8239.34	0.00293713
8262.06	0.00292905
8284.78	0.00292102
8307.51	0.00291303
8330.23	0.00290508
8352.95	0.00289718
8375.68	0.00288932
8398.4	0.0028815
8421.12	0.00287373
8443.84	0.00286599
8466.57	0.0028583
8489.29	0.00285065
8512.01	0.00284304
8534.73	0.00283547
8557.46	0.00282794
8580.18	0.00282045
8602.9	0.002813
8625.63	0.00280559
8648.35	0.00279822
8671.07	0.00279089
8693.79	0.00278359
8716.52	0.00277634
8739.24	0.00276912
8761.96	0.00276194
8784.68	0.00275479
8807.41	0.00274769
8830.13	0.00274062
8852.85	0.00273358
8875.58	0.00272658
8898.3	0.00271962
8921.02	0.00271269
8943.74	0.0027058
8966.47	0.00269895
8989.19	0.00269212
9011.91	0.00268533
9034.63	0.00267858
9057.36	0.00267186
9080.08	0.00266517
9102.8	0.00265852
9125.53	0.0026519
9148.25	0.00264532
9170.97	0.00263876
9193.69	0.00263224
9216.42	0.00262575
9239.14	0.00261929
9261.86	0.00261287
9284.58	0.00260647
9307.31	0.00260011
9330.03	0.00259378
9352.75	0.00258747
9375.48	0.0025812
9398.2	0.00257496
9420.92	0.00256875
9443.64	0.00256257
9466.37	0.00255642
9489.09	0.0025503
9511.81	0.00254421
9534.53	0.00253814
9557.26	0.00253211
9579.98	0.0025261
9602.7	0.00252012
9625.43	0.00251417
9648.15	0.00250825
9670.87	0.00250236
9693.59	0.00249649
9716.32	0.00249066
9739.04	0.00248484
9761.76	0.00247906
9784.48	0.0024733
9807.21	0.00246757
9829.93	0.00246187
9852.65	0.00245619
9875.38	0.00245054
9898.1	0.00244491
9920.82	0.00243931
9943.54	0.00243374
9966.27	0.00242819
9988.99	0.00242267
10011.7	0.00241717
10034.4	0.0024117
10057.2	0.00240625
10079.9	0.00240082
10102.6	0.00239542
10125.3	0.00239005
10148	0.0023847
10170.8	0.00237937
10193.5	0.00237406
10216.2	0.00236878
10238.9	0.00236353
10261.7	0.00235829
10284.4	0.00235308
10307.1	0.00234789
10329.8	0.00234273
10352.6	0.00233759
10375.3	0.00233247
10398	0.00232737
10420.7	0.0023223
10443.4	0.00231724
10466.2	0.00231221
10488.9	0.0023072
10511.6	0.00230222
10534.3	0.00229725
10557.1	0.00229231
10579.8	0.00228738
10602.5	0.00228248
10625.2	0.0022776
10647.9	0.00227274
10670.7	0.0022679
10693.4	0.00226308
10716.1	0.00225828
10738.8	0.0022535
10761.6	0.00224874
10784.3	0.00224401
10807	0.00223929
10829.7	0.00223459
10852.5	0.00222991
10875.2	0.00222525
10897.9	0.00222061
10920.6	0.00221599
10943.3	0.00221139
10966.1	0.00220681
10988.8	0.00220224
11011.5	0.0021977
11034.2	0.00219317
11057	0.00218867
11079.7	0.00218418
11102.4	0.00217971
11125.1	0.00217526
11147.8	0.00217082
11170.6	0.00216641
11193.3	0.00216201
11216	0.00215763
11238.7	0.00215327
11261.5	0.00214892
11284.2	0.00214459
11306.9	0.00214028
11329.6	0.00213599
11352.4	0.00213172
11375.1	0.00212746
11397.8	0.00212322
11420.5	0.00211899
11443.2	0.00211479
11466	0.00211059
11488.7	0.00210642
11511.4	0.00210226
11534.1	0.00209812
11556.9	0.00209399
11579.6	0.00208989
11602.3	0.00208579
11625	0.00208172
11647.7	0.00207765
11670.5	0.00207361
11693.2	0.00206958
11715.9	0.00206557
11738.6	0.00206157
11761.4	0.00205758
11784.1	0.00205362
11806.8	0.00204967
11829.5	0.00204573
11852.3	0.00204181
11875	0.0020379
11897.7	0.00203401
11920.4	0.00203013
11943.1	0.00202627
11965.9	0.00202242
11988.6	0.00201859
12011.3	0.00201477
12034	0.00201096
12056.8	0.00200717
12079.5	0.0020034
12102.2	0.00199964
12124.9	0.00199589
12147.6	0.00199216
12170.4	0.00198844
12193.1	0.00198473
12215.8	0.00198104
12238.5	0.00197736
12261.3	0.0019737
12284	0.00197004
12306.7	0.00196641
12329.4	0.00196278
12352.2	0.00195917
12374.9	0.00195558
12397.6	0.00195199
12420.3	0.00194842
12443	0.00194486
12465.8	0.00194132
12488.5	0.00193778
12511.2	0.00193427
12533.9	0.00193076
12556.7	0.00192726
12579.4	0.00192378
12602.1	0.00192031
12624.8	0.00191686
12647.5	0.00191341
12670.3	0.00190998
12693	0.00190656
12715.7	0.00190316
12738.4	0.00189976
12761.2	0.00189638
12783.9	0.00189301
12806.6	0.00188965
12829.3	0.0018863
12852.1	0.00188297
12874.8	0.00187964
12897.5	0.00187633
12920.2	0.00187303
12942.9	0.00186974
12965.7	0.00186647
12988.4	0.0018632
13011.1	0.00185995
13033.8	0.00185671
13056.6	0.00185347
13079.3	0.00185025
13102	0.00184705
13124.7	0.00184385
13147.4	0.00184066
13170.2	0.00183749
13192.9	0.00183432
13215.6	0.00183117
13238.3	0.00182802
13261.1	0.00182489
13283.8	0.00182177
13306.5	0.00181866
13329.2	0.00181556
13352	0.00181247
13374.7	0.00180939
13397.4	0.00180632
13420.1	0.00180326
13442.8	0.00180021
13465.6	0.00179718
13488.3	0.00179415
13511	0.00179113
13533.7	0.00178812
13556.5	0.00178513
13579.2	0.00178214
13601.9	0.00177916
13624.6	0.0017762
13647.3	0.00177324
13670.1	0.00177029
13692.8	0.00176735
13715.5	0.00176443
13738.2	0.00176151
13761	0.0017586
13783.7	0.0017557
13806.4	0.00175281
13829.1	0.00174993
13851.9	0.00174706
13874.6	0.0017442
13897.3	0.00174135
13920	0.0017385
13942.7	0.00173567
13965.5	0.00173285
13988.2	0.00173003
14010.9	0.00172723
14033.6	0.00172443
14056.4	0.00172164
14079.1	0.00171886
14101.8	0.00171609
14124.5	0.00171333
14147.2	0.00171058
14170	0.00170784
14192.7	0.0017051
14215.4	0.00170238
14238.1	0.00169966
14260.9	0.00169695
14283.6	0.00169425
14306.3	0.00169156
14329	0.00168888
14351.8	0.00168621
14374.5	0.00168354
14397.2	0.00168088
14419.9	0.00167823
14442.6	0.00167559
14465.4	0.00167296
14488.1	0.00167034
14510.8	0.00166772
14533.5	0.00166511
14556.3	0.00166252
14579	0.00165992
14601.7	0.00165734
14624.4	0.00165477
14647.1	0.0016522
14669.9	0.00164964
14692.6	0.00164709
14715.3	0.00164455
14738	0.00164201
14760.8	0.00163948
14783.5	0.00163696
14806.2	0.00163445
14828.9	0.00163195
14851.7	0.00162945
14874.4	0.00162696
14897.1	0.00162448
14919.8	0.001622
14942.5	0.00161954
14965.3	0.00161708
14988	0.00161463
15010.7	0.00161218
15033.4	0.00160975
15056.2	0.00160732
15078.9	0.00160489
15101.6	0.00160248
15124.3	0.00160007
15147	0.00159767
15169.8	0.00159528
15192.5	0.00159289
15215.2	0.00159051
15237.9	0.00158814
15260.7	0.00158578
15283.4	0.00158342
15306.1	0.00158107
15328.8	0.00157872
15351.6	0.00157639
15374.3	0.00157406
15397	0.00157174
15419.7	0.00156942
15442.4	0.00156711
15465.2	0.00156481
15487.9	0.00156251
15510.6	0.00156022
15533.3	0.00155794
15556.1	0.00155566
15578.8	0.0015534
15601.5	0.00155113
15624.2	0.00154888
15646.9	0.00154663
15669.7	0.00154438
15692.4	0.00154215
15715.1	0.00153992
15737.8	0.0015377
15760.6	0.00153548
15783.3	0.00153327
15806	0.00153106
15828.7	0.00152887
15851.5	0.00152667
15874.2	0.00152449
15896.9	0.00152231
15919.6	0.00152014
15942.3	0.00151797
15965.1	0.00151581
15987.8	0.00151366
16010.5	0.00151151
16033.2	0.00150936
16056	0.00150723
16078.7	0.0015051
16101.4	0.00150297
16124.1	0.00150086
16146.8	0.00149874
16169.6	0.00149664
16192.3	0.00149454
16215	0.00149244
16237.7	0.00149036
16260.5	0.00148827
16283.2	0.0014862
16305.9	0.00148412
16328.6	0.00148206
16351.4	0.00148
16374.1	0.00147795
16396.8	0.0014759
16419.5	0.00147386
16442.2	0.00147182
16465	0.00146979
16487.7	0.00146776
16510.4	0.00146574
16533.1	0.00146373
16555.9	0.00146172
16578.6	0.00145972
16601.3	0.00145772
16624	0.00145572
16646.7	0.00145374
16669.5	0.00145176
16692.2	0.00144978
16714.9	0.00144781
16737.6	0.00144584
16760.4	0.00144388
16783.1	0.00144193
16805.8	0.00143998
16828.5	0.00143803
16851.3	0.0014361
16874	0.00143416
16896.7	0.00143223
16919.4	0.00143031
16942.1	0.00142839
16964.9	0.00142648
16987.6	0.00142457
17010.3	0.00142267
17033	0.00142077
17055.8	0.00141888
17078.5	0.00141699
17101.2	0.00141511
17123.9	0.00141323
17146.6	0.00141135
17169.4	0.00140949
17192.1	0.00140762
17214.8	0.00140577
17237.5	0.00140391
17260.3	0.00140206
17283	0.00140022
17305.7	0.00139838
17328.4	0.00139655
17351.2	0.00139472
17373.9	0.0013929
17396.6	0.00139108
17419.3	0.00138926
17442	0.00138745
17464.8	0.00138565
17487.5	0.00138385
17510.2	0.00138205
17532.9	0.00138026
17555.7	0.00137847
17578.4	0.00137669
17601.1	0.00137491
17623.8	0.00137314
17646.5	0.00137137
17669.3	0.00136961
17692	0.00136785
17714.7	0.0013661
17737.4	0.00136435
17760.2	0.0013626
17782.9	0.00136086
17805.6	0.00135912
17828.3	0.00135739
17851.1	0.00135566
17873.8	0.00135394
17896.5	0.00135222
17919.2	0.00135051
17941.9	0.00134879
17964.7	0.00134709
17987.4	0.00134539
18010.1	0.00134369
18032.8	0.001342
18055.6	0.00134031
18078.3	0.00133862
18101	0.00133694
18123.7	0.00133527
18146.4	0.00133359
18169.2	0.00133193
18191.9	0.00133026
18214.6	0.0013286
18237.3	0.00132695
18260.1	0.0013253
18282.8	0.00132365
18305.5	0.00132201
18328.2	0.00132037
18351	0.00131873
18373.7	0.0013171
18396.4	0.00131548
18419.1	0.00131385
18441.8	0.00131223
18464.6	0.00131062
18487.3	0.00130901
18510	0.0013074
18532.7	0.0013058
18555.5	0.0013042
18578.2	0.0013026
18600.9	0.00130101
18623.6	0.00129942
18646.3	0.00129784
18669.1	0.00129626
18691.8	0.00129469
18714.5	0.00129311
18737.2	0.00129155
18760	0.00128998
18782.7	0.00128842
18805.4	0.00128686
18828.1	0.00128531
18850.9	0.00128376
18873.6	0.00128222
18896.3	0.00128067
18919	0.00127914
18941.7	0.0012776
18964.5	0.00127607
18987.2	0.00127454
19009.9	0.00127302
19032.6	0.0012715
19055.4	0.00126998
19078.1	0.00126847
19100.8	0.00126696
19123.5	0.00126546
19146.2	0.00126396
19169	0.00126246
19191.7	0.00126096
19214.4	0.00125947
19237.1	0.00125798
19259.9	0.0012565
19282.6	0.00125502
19305.3	0.00125354
19328	0.00125207
19350.8	0.0012506
19373.5	0.00124913
19396.2	0.00124767
19418.9	0.00124621
19441.6	0.00124475
19464.4	0.0012433
19487.1	0.00124185
19509.8	0.0012404
19532.5	0.00123896
19555.3	0.00123752
19578	0.00123608
19600.7	0.00123465
19623.4	0.00123322
19646.1	0.00123179
19668.9	0.00123037
19691.6	0.00122895
19714.3	0.00122753
19737	0.00122612
19759.8	0.00122471
19782.5	0.0012233
19805.2	0.0012219
19827.9	0.0012205
19850.7	0.0012191
19873.4	0.00121771
19896.1	0.00121632
19918.8	0.00121493
19941.5	0.00121355
19964.3	0.00121217
19987	0.00121079
20009.7	0.00120941
20032.4	0.00120804
20055.2	0.00120667
20077.9	0.00120531
20100.6	0.00120394
20123.3	0.00120258
20146	0.00120123
20168.8	0.00119987
20191.5	0.00119852
20214.2	0.00119718
20236.9	0.00119583
20259.7	0.00119449
20282.4	0.00119315
20305.1	0.00119182
20327.8	0.00119049
20350.6	0.00118916
20373.3	0.00118783
20396	0.00118651
20418.7	0.00118519
20441.4	0.00118387
20464.2	0.00118256
20486.9	0.00118124
20509.6	0.00117993
20532.3	0.00117863
20555.1	0.00117733
20577.8	0.00117603
20600.5	0.00117473
20623.2	0.00117343
20645.9	0.00117214
20668.7	0.00117085
20691.4	0.00116957
20714.1	0.00116829
20736.8	0.00116701
20759.6	0.00116573
20782.3	0.00116445
20805	0.00116318
20827.7	0.00116191
20850.5	0.00116065
20873.2	0.00115938
20895.9	0.00115812
20918.6	0.00115686
20941.3	0.00115561
20964.1	0.00115436
20986.8	0.00115311
21009.5	0.00115186
21032.2	0.00115061
21055	0.00114937
21077.7	0.00114813
21100.4	0.0011469
21123.1	0.00114566
21145.8	0.00114443
21168.6	0.0011432
21191.3	0.00114198
21214	0.00114076
21236.7	0.00113953
21259.5	0.00113832
21282.2	0.0011371
21304.9	0.00113589
21327.6	0.00113468
21350.4	0.00113347
21373.1	0.00113227
21395.8	0.00113106
21418.5	0.00112986
21441.2	0.00112867
21464	0.00112747
21486.7	0.00112628
21509.4	0.00112509
21532.1	0.0011239
21554.9	0.00112272
21577.6	0.00112153
21600.3	0.00112035
21623	0.00111918
21645.7	0.001118
21668.5	0.00111683
21691.2	0.00111566
21713.9	0.00111449
21736.6	0.00111333
21759.4	0.00111217
21782.1	0.001111
21804.8	0.00110985
21827.5	0.00110869
21850.3	0.00110754
21873	0.00110639
21895.7	0.00110524
21918.4	0.00110409
21941.1	0.00110295
21963.9	0.00110181
21986.6	0.00110067
22009.3	0.00109953
22032	0.0010984
22054.8	0.00109727
22077.5	0.00109614
22100.2	0.00109501
22122.9	0.00109389
22145.6	0.00109277
22168.4	0.00109165
22191.1	0.00109053
22213.8	0.00108941
22236.5	0.0010883
22259.3	0.00108719
22282	0.00108608
22304.7	0.00108497
22327.4	0.00108387
22350.2	0.00108277
22372.9	0.00108167
22395.6	0.00108057
22418.3	0.00107947
22441	0.00107838
22463.8	0.00107729
22486.5	0.0010762
22509.2	0.00107512
22531.9	0.00107403
22554.7	0.00107295
22577.4	0.00107187
22600.1	0.00107079
22622.8	0.00106972
22645.5	0.00106864
22668.3	0.00106757
22691	0.0010665
22713.7	0.00106544
22736.4	0.00106437
22759.2	0.00106331
22781.9	0.00106225
22804.6	0.00106119
22827.3	0.00106013
22850.1	0.00105908
22872.8	0.00105803
22895.5	0.00105698
22918.2	0.00105593
22940.9	0.00105488
22963.7	0.00105384
22986.4	0.0010528
23009.1	0.00105176
23031.8	0.00105072
23054.6	0.00104968
23077.3	0.00104865
23100	0.00104762
